# Supplementary material for: Potent and selective anticancer activity of half-sandwich ruthenium and osmium complexes with modified curcuminoid ligands
Source: Royal Society of Chemistry journal article supplement (doi:10.1039/d2dt02328h), 2022-01-01
Supplement: d2dt02328h1.pdf [file d2dt02328h1.pdf]

# Potent and Selective Anticancer Activity of Half-Sandwich Ruthenium and Osmium Complexes with Modified Curcuminoid Ligands

*Noemi Pagliaricci,<sup>a</sup> Riccardo Pettinari,<sup>a\*</sup> Fabio Marchetti,<sup>b</sup> Claudio Pettinari,<sup>a</sup> Loredana Cappellacci,<sup>a</sup> Alessia Tombesi,<sup>a</sup> Massimiliano Cuccioloni,<sup>c</sup> Mouna Hadiji,<sup>d</sup> Paul J. Dyson.<sup>d\*</sup>*

<sup>a</sup>School of Pharmacy, <sup>b</sup>School of Science and Technology and <sup>c</sup>School of Biosciences and Veterinary Medicine, University of Camerino, via Madonna delle Carceri (ChIP), 62032 Camerino, Italy. <sup>d</sup>Institut des Sciences et Ingénierie Chimiques, École Polytechnique Fédérale de Lausanne (EPFL), 1015 Lausanne, Switzerland.

**Supporting Information**

## Index

|                                                                                                          |    |
|----------------------------------------------------------------------------------------------------------|----|
| <b>Figure S1.</b> $^1\text{H}$ -NMR of p-curcH in $\text{CDCl}_3$ at 293 K.....                          | 5  |
| <b>Figure S2.</b> $^1\text{H}$ -NMR of p-bdcureH in $\text{CDCl}_3$ at 293 K.....                        | 6  |
| <b>Figure S3.</b> $^1\text{H}$ -NMR of <b>1</b> in $\text{CDCl}_3$ at 298 K.....                         | 8  |
| <b>Figure S4.</b> $^{13}\text{C}$ -NMR of <b>1</b> in $\text{CDCl}_3$ at 293 K.....                      | 11 |
| <b>Figure S5.</b> $\{^1\text{H}-^1\text{H}\}$ -COSY NMR of <b>1</b> in $\text{CDCl}_3$ at 293 K.....     | 12 |
| <b>Figure S6.</b> $\{^1\text{H}-^{13}\text{C}\}$ -HSQC NMR of <b>1</b> in $\text{CDCl}_3$ at 293 K.....  | 15 |
| <b>Figure S7.</b> $\{^1\text{H}-^{13}\text{C}\}$ -HMBC NMR of <b>1</b> in $\text{CDCl}_3$ at 293 K.....  | 16 |
| <b>Figure S8.</b> $^1\text{H}$ -NMR of <b>2</b> in $\text{CDCl}_3$ at 293 K.....                         | 18 |
| <b>Figure S9.</b> $^{13}\text{C}$ -NMR of <b>2</b> in $\text{CDCl}_3$ at 293 K.....                      | 21 |
| <b>Figure S10.</b> $\{^1\text{H}-^1\text{H}\}$ -COSY NMR of <b>2</b> in $\text{CDCl}_3$ at 293 K.....    | 22 |
| <b>Figure S11.</b> $\{^1\text{H}-^{13}\text{C}\}$ -HSQC NMR of <b>2</b> in $\text{CDCl}_3$ at 293 K..... | 25 |
| <b>Figure S12.</b> $\{^1\text{H}-^{13}\text{C}\}$ -HMBC NMR of <b>2</b> in $\text{CDCl}_3$ at 293 K..... | 26 |
| <b>Figure S13.</b> $^1\text{H}$ -NMR of <b>3</b> in $\text{CDCl}_3$ at 293 K.....                        | 28 |
| <b>Figure S14.</b> $^{13}\text{C}$ -NMR of <b>3</b> in $\text{CDCl}_3$ at 293 K.....                     | 31 |
| <b>Figure S15.</b> $\{^1\text{H}-^1\text{H}\}$ -COSY NMR of <b>3</b> in $\text{CDCl}_3$ at 293 K.....    | 32 |
| <b>Figure S16.</b> $\{^1\text{H}-^{13}\text{C}\}$ -HSQC NMR of <b>3</b> in $\text{CDCl}_3$ at 293 K..... | 35 |
| <b>Figure S17.</b> $\{^1\text{H}-^{13}\text{C}\}$ -HMBC NMR of <b>3</b> in $\text{CDCl}_3$ at 293 K..... | 37 |
| <b>Figure S18.</b> $^1\text{H}$ -NMR of <b>4</b> in $\text{CDCl}_3$ at 298 K.....                        | 39 |
| <b>Figure S19.</b> $^{13}\text{C}$ -NMR of <b>4</b> in $\text{CDCl}_3$ at 298 K.....                     | 42 |
| <b>Figure S20.</b> $\{^1\text{H}-^1\text{H}\}$ -COSY NMR of <b>4</b> in $\text{CDCl}_3$ at 293 K.....    | 43 |
| <b>Figure S21.</b> $\{^1\text{H}-^{13}\text{C}\}$ -HSQC NMR of <b>4</b> in $\text{CDCl}_3$ at 293 K..... | 46 |
| <b>Figure S22.</b> $\{^1\text{H}-^{13}\text{C}\}$ -HMBC NMR of <b>4</b> in $\text{CDCl}_3$ at 293 K..... | 48 |
| <b>Figure S23.</b> $^1\text{H}$ -NMR of <b>5</b> in DMSO at 293 K.....                                   | 50 |
| <b>Figure S24.</b> $^{13}\text{C}$ -NMR of <b>5</b> in DMSO at 293 K.....                                | 54 |
| <b>Figure S25.</b> $^{31}\text{P}$ -NMR of <b>5</b> in DMSO at 293 K.....                                | 55 |
| <b>Figure S26.</b> $\{^1\text{H}-^1\text{H}\}$ - COSY NMR of <b>5</b> in DMSO at 293 K.....              | 56 |
| <b>Figure S27.</b> $\{^1\text{H}-^{13}\text{C}\}$ -HSQC NMR of <b>5</b> in DMSO at 293 K.....            | 59 |
| <b>Figure S28.</b> $\{^1\text{H}-^{13}\text{C}\}$ -HMBC NMR of <b>5</b> in DMSO at 293 K.....            | 60 |
| <b>Figure S29.</b> $^1\text{H}$ -NMR of <b>6</b> in DMSO at 293 K.....                                   | 62 |
| <b>Figure S30.</b> $^{13}\text{C}$ -NMR of <b>6</b> in DMSO at 293 K.....                                | 66 |
| <b>Figure S31.</b> $^{31}\text{P}$ -NMR of <b>6</b> in DMSO at 293 K.....                                | 67 |
| <b>Figure S32.</b> $\{^1\text{H}-^1\text{H}\}$ - COSY NMR of <b>6</b> in DMSO at 293 K.....              | 68 |

|                                                                                                                                                                                                                         |     |
|-------------------------------------------------------------------------------------------------------------------------------------------------------------------------------------------------------------------------|-----|
| <b>Figure S33.</b> $\{^1\text{H}-^{13}\text{C}\}$ -HSQC NMR of <b>6</b> in DMSO at 293 K.....                                                                                                                           | 71  |
| <b>Figure S34.</b> $\{^1\text{H}-^{13}\text{C}\}$ -HMBC NMR of <b>6</b> in DMSO at 293 K.....                                                                                                                           | 72  |
| <b>Figure S35.</b> $^1\text{H}$ -NMR of <b>7</b> in DMSO at 293 K.....                                                                                                                                                  | 74  |
| <b>Figure S36.</b> $^{13}\text{C}$ -NMR of <b>7</b> in DMSO at 293 K.....                                                                                                                                               | 78  |
| <b>Figure S37.</b> $^{31}\text{P}$ -NMR of <b>7</b> in DMSO at 293 K.....                                                                                                                                               | 79  |
| <b>Figure S38.</b> $\{^1\text{H}-^1\text{H}\}$ - COSY NMR of <b>7</b> in DMSO at 293 K.....                                                                                                                             | 81  |
| <b>Figure S39.</b> $\{^1\text{H}-^{13}\text{C}\}$ -HSQC NMR of <b>7</b> in DMSO at 293 K.....                                                                                                                           | 84  |
| <b>Figure S40.</b> $\{^1\text{H}-^{13}\text{C}\}$ -HMBC NMR of <b>7</b> in DMSO at 293 K.....                                                                                                                           | 85  |
| <b>Figure S41.</b> $^1\text{H}$ -NMR of <b>8</b> in DMSO at 293 K.....                                                                                                                                                  | 87  |
| <b>Figure S42.</b> $^{13}\text{C}$ -NMR of <b>8</b> in DMSO at 293 K.....                                                                                                                                               | 91  |
| <b>Figure S43.</b> $^{31}\text{P}$ -NMR of <b>8</b> in DMSO at 293 K.....                                                                                                                                               | 92  |
| <b>Figure S44.</b> $\{^1\text{H}-^1\text{H}\}$ - COSY NMR of <b>8</b> in DMSO at 293 K.....                                                                                                                             | 94  |
| <b>Figure S45.</b> $\{^1\text{H}-^{13}\text{C}\}$ - HSQC NMR of <b>8</b> in DMSO at 293 K.....                                                                                                                          | 97  |
| <b>Figure S46.</b> $\{^1\text{H}-^{13}\text{C}\}$ - HMBC NMR of <b>8</b> in DMSO at 293 K.....                                                                                                                          | 98  |
| <b>Figure S47.</b> UV-vis spectrum of <b>1</b> in DMSO at 293 K.....                                                                                                                                                    | 99  |
| <b>Figure S48.</b> UV-vis spectrum of <b>1</b> in DMSO-PBS (5%) at : 277 K ( <b>a</b> ), room temperature ( <b>b</b> ) and 310 K( <b>c</b> ). .....                                                                     | 100 |
| <b>Figure S49.</b> UV-vis spectrum of <b>3</b> in DMSO-PBS (5%) at : 277 K ( <b>a</b> ), room temperature ( <b>b</b> ) and 310 K( <b>c</b> ). .....                                                                     | 101 |
| <b>Figure S50.</b> UV-vis spectrum of <b>5</b> in DMSO-PBS (5%) at : 277 K ( <b>a</b> ), room temperature ( <b>b</b> ) and 310 K( <b>c</b> ). .....                                                                     | 102 |
| <b>Table S1.</b> IC <sub>50</sub> values of all curcuminoid complexes for A2780, A2780R and HEK.....                                                                                                                    | 103 |
| <b>Figure S51.</b> Changes in fluorescence emission spectra of DAPI-DNA complex upon excitation at 338 nm in the presence of increasing concentrations of complexes <b>1</b> , <b>2</b> , <b>4</b> and <b>5</b> . ..... | 104 |
| <b>Figure S52.</b> Decrease in absorbance at 600 nm of the MethylGreen-DNA complex in the presence of increasing concentrations of complexes <b>1</b> , <b>2</b> , <b>4</b> and <b>5</b> . .....                        | 105 |
| <b>Figure S53.</b> Comparative changes in emission anisotropy with time observed upon cell membrane passage of <b>1</b> (Panel A), <b>2</b> (Panel B), <b>3</b> (Panel C) and <b>4</b> (Panel D).....                   | 106 |
| <b>Figure S54.</b> Detailed kinetic analyses of individual membrane entry/release stages of complex <b>1</b> (Panel A), complex <b>2</b> (Panel B) and complex <b>4</b> (Panel C). .....                                | 107 |
| <b>Table S2 -</b> Kinetic rate constants corresponding to the main steps of the drug internalization event for complexes <b>1</b> , <b>2</b> , <b>4</b> and <b>5</b> . .....                                            | 107 |
| <b>Figure S55.</b> Effect of pH on the serum albumin binding. Representative comparison of the kinetics of binding of complex <b>5</b> to surface blocked BSA under different pH conditions. ....                       | 108 |
| <b>Figure S56.</b> Decrease in intrinsic emission of BSA at 360 nm upon quenching of Trp fluorescence in the presence of increasing concentrations of complexes <b>1</b> , <b>2</b> , <b>4</b> and <b>5</b> . .....     | 109 |

**Figure S57.** Comparison of the computed binding modes of complexes 1, 2, 4 and 5 to crystallographic structure of HSA. Trp residue responsible for the intrinsic fluorescence of HSA is rendered as red stick..... 110

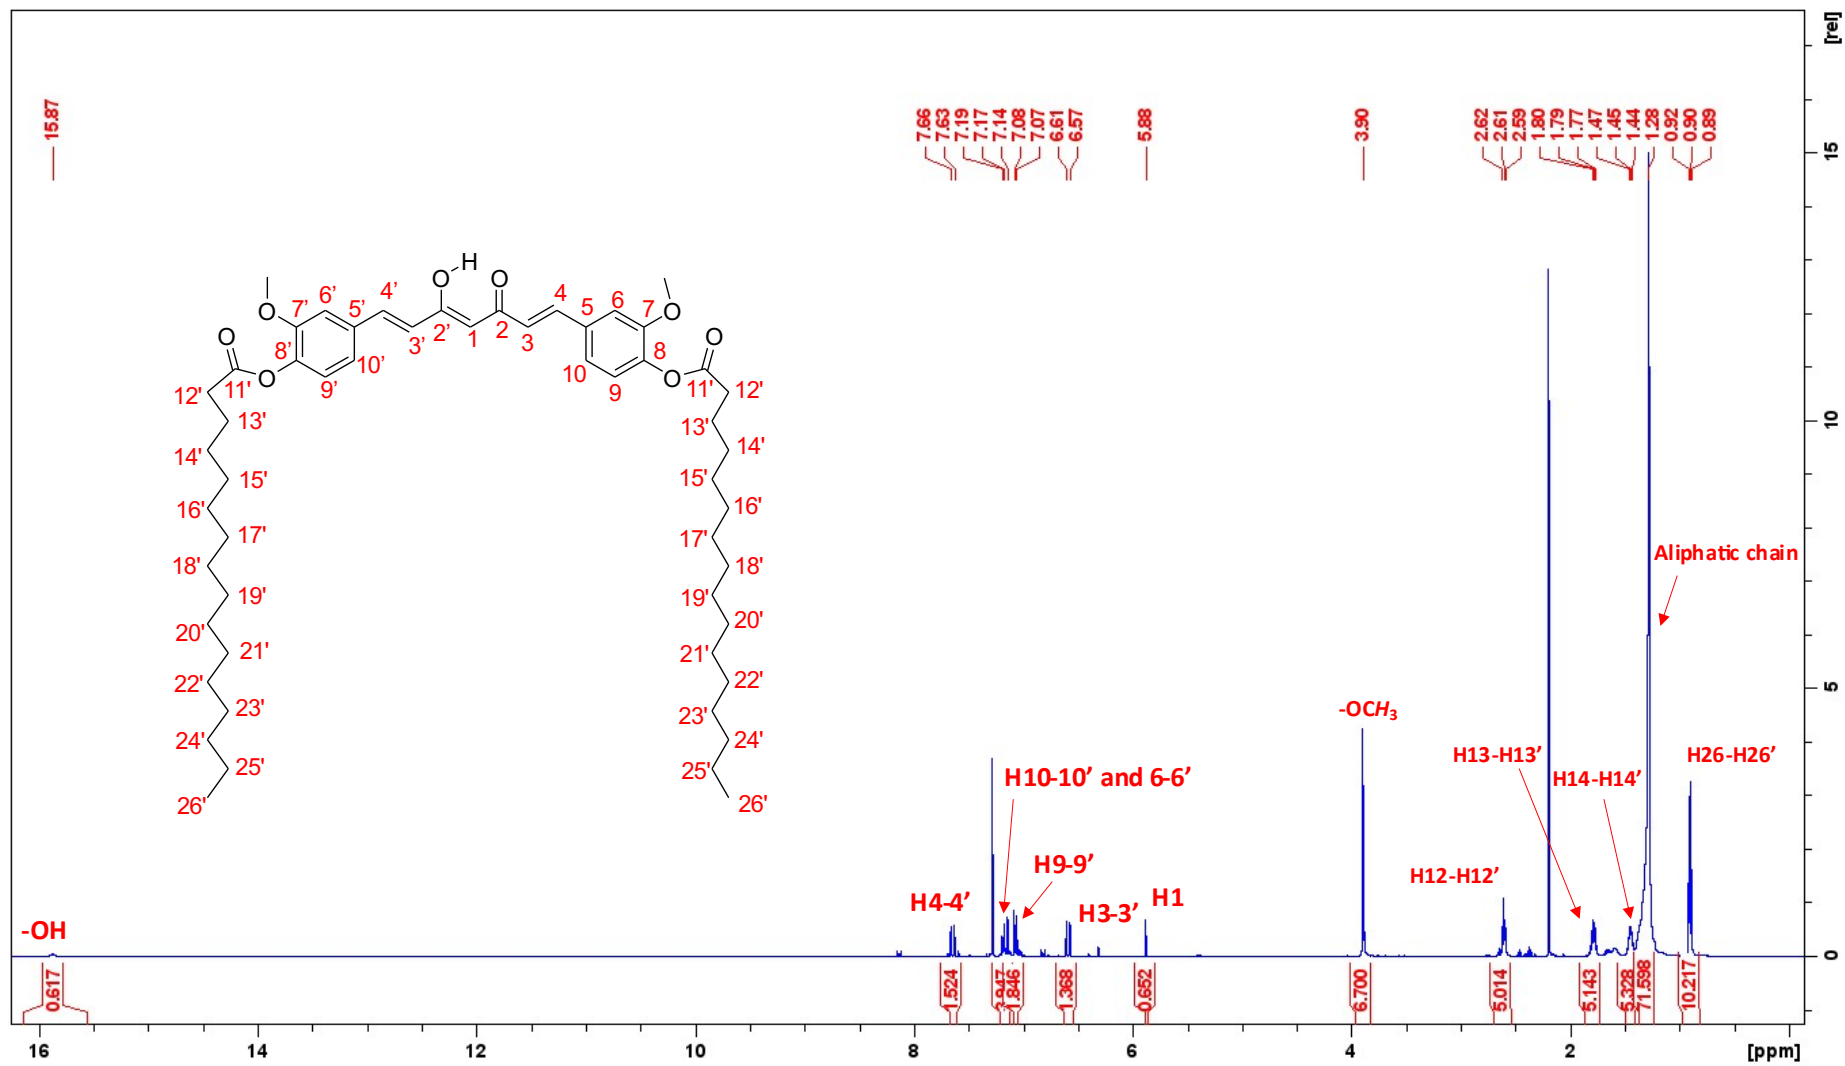

**Figure S1.**  $^1\text{H-NMR}$  of p-curcH in  $\text{CDCl}_3$  at 293 K

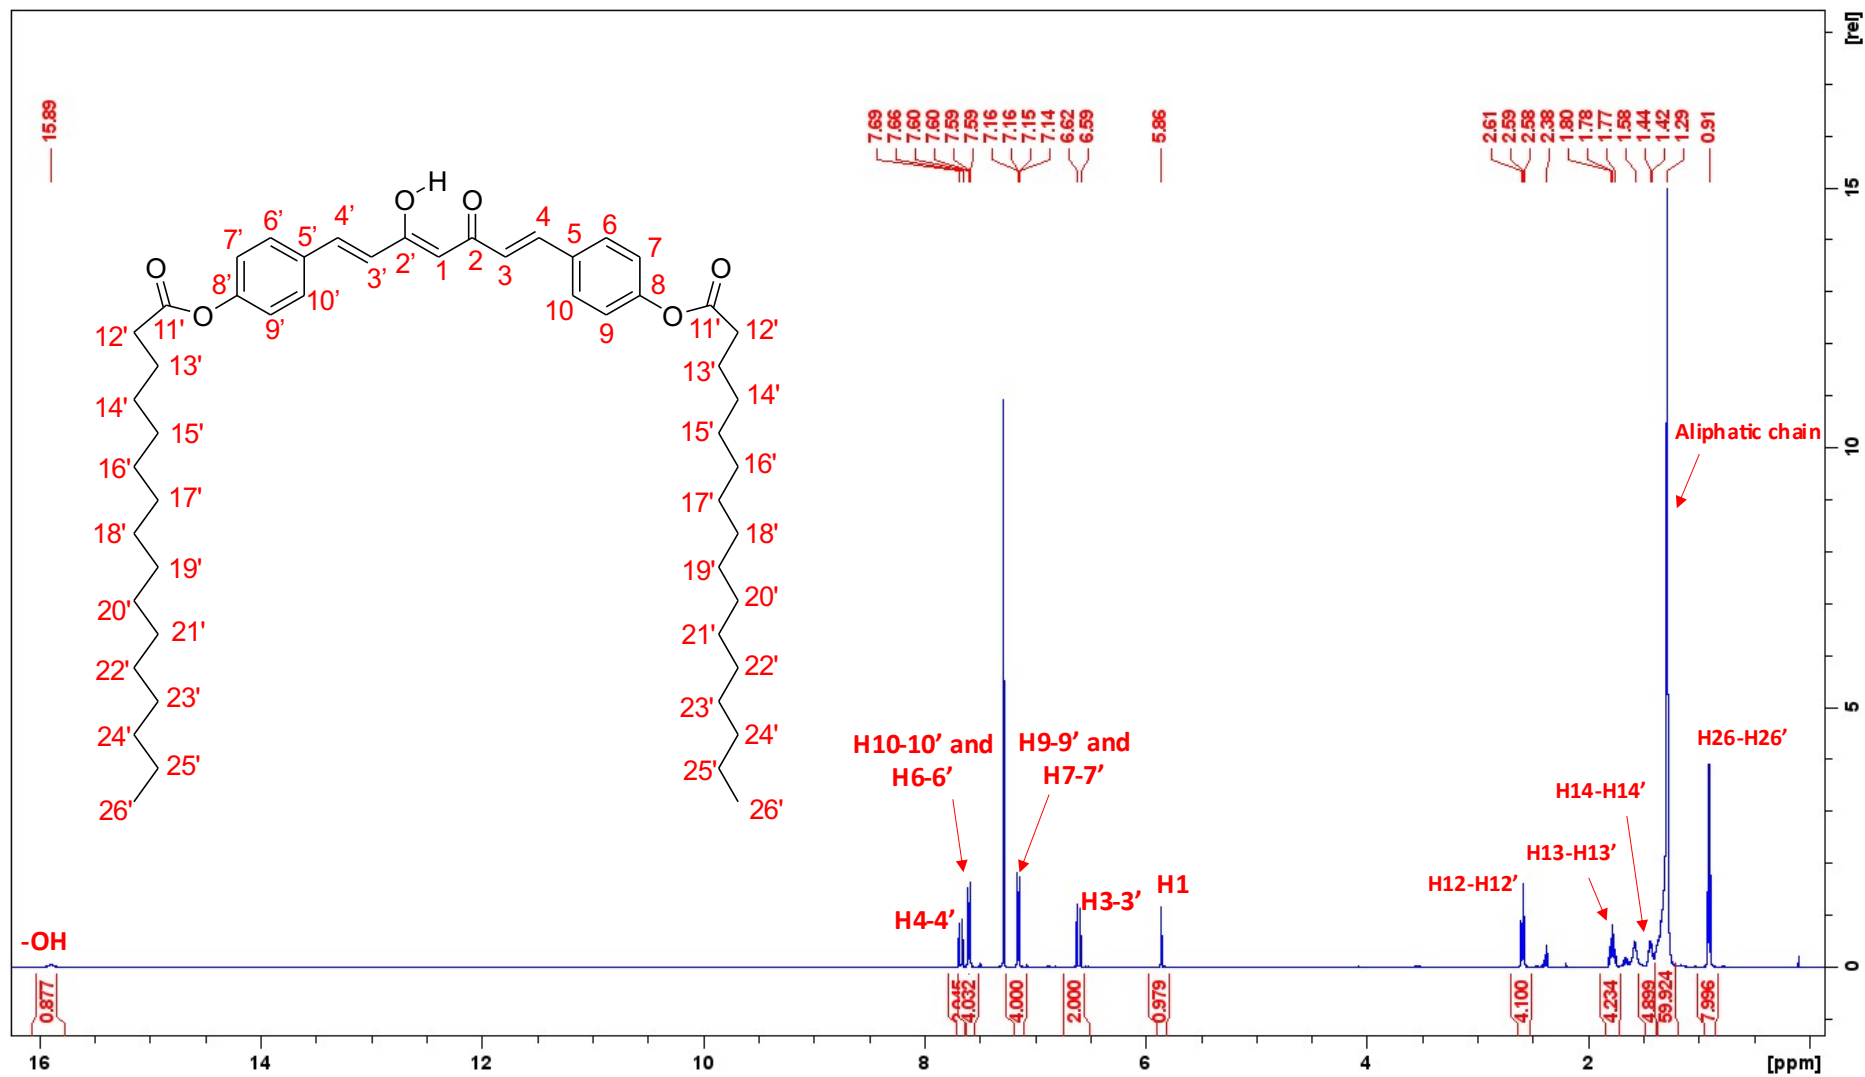

Figure S2. <sup>1</sup>H-NMR of p-bdcurch in CDCl<sub>3</sub> at 293 K

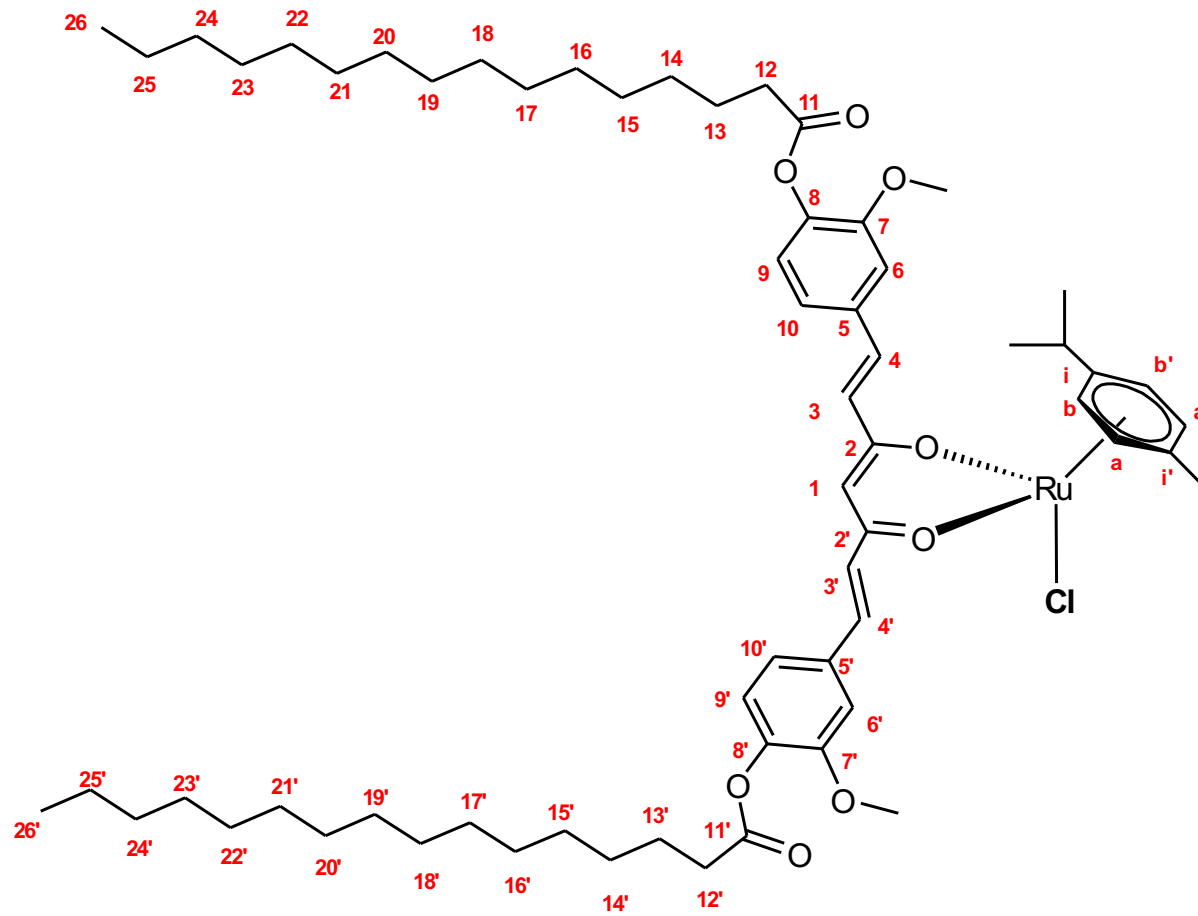

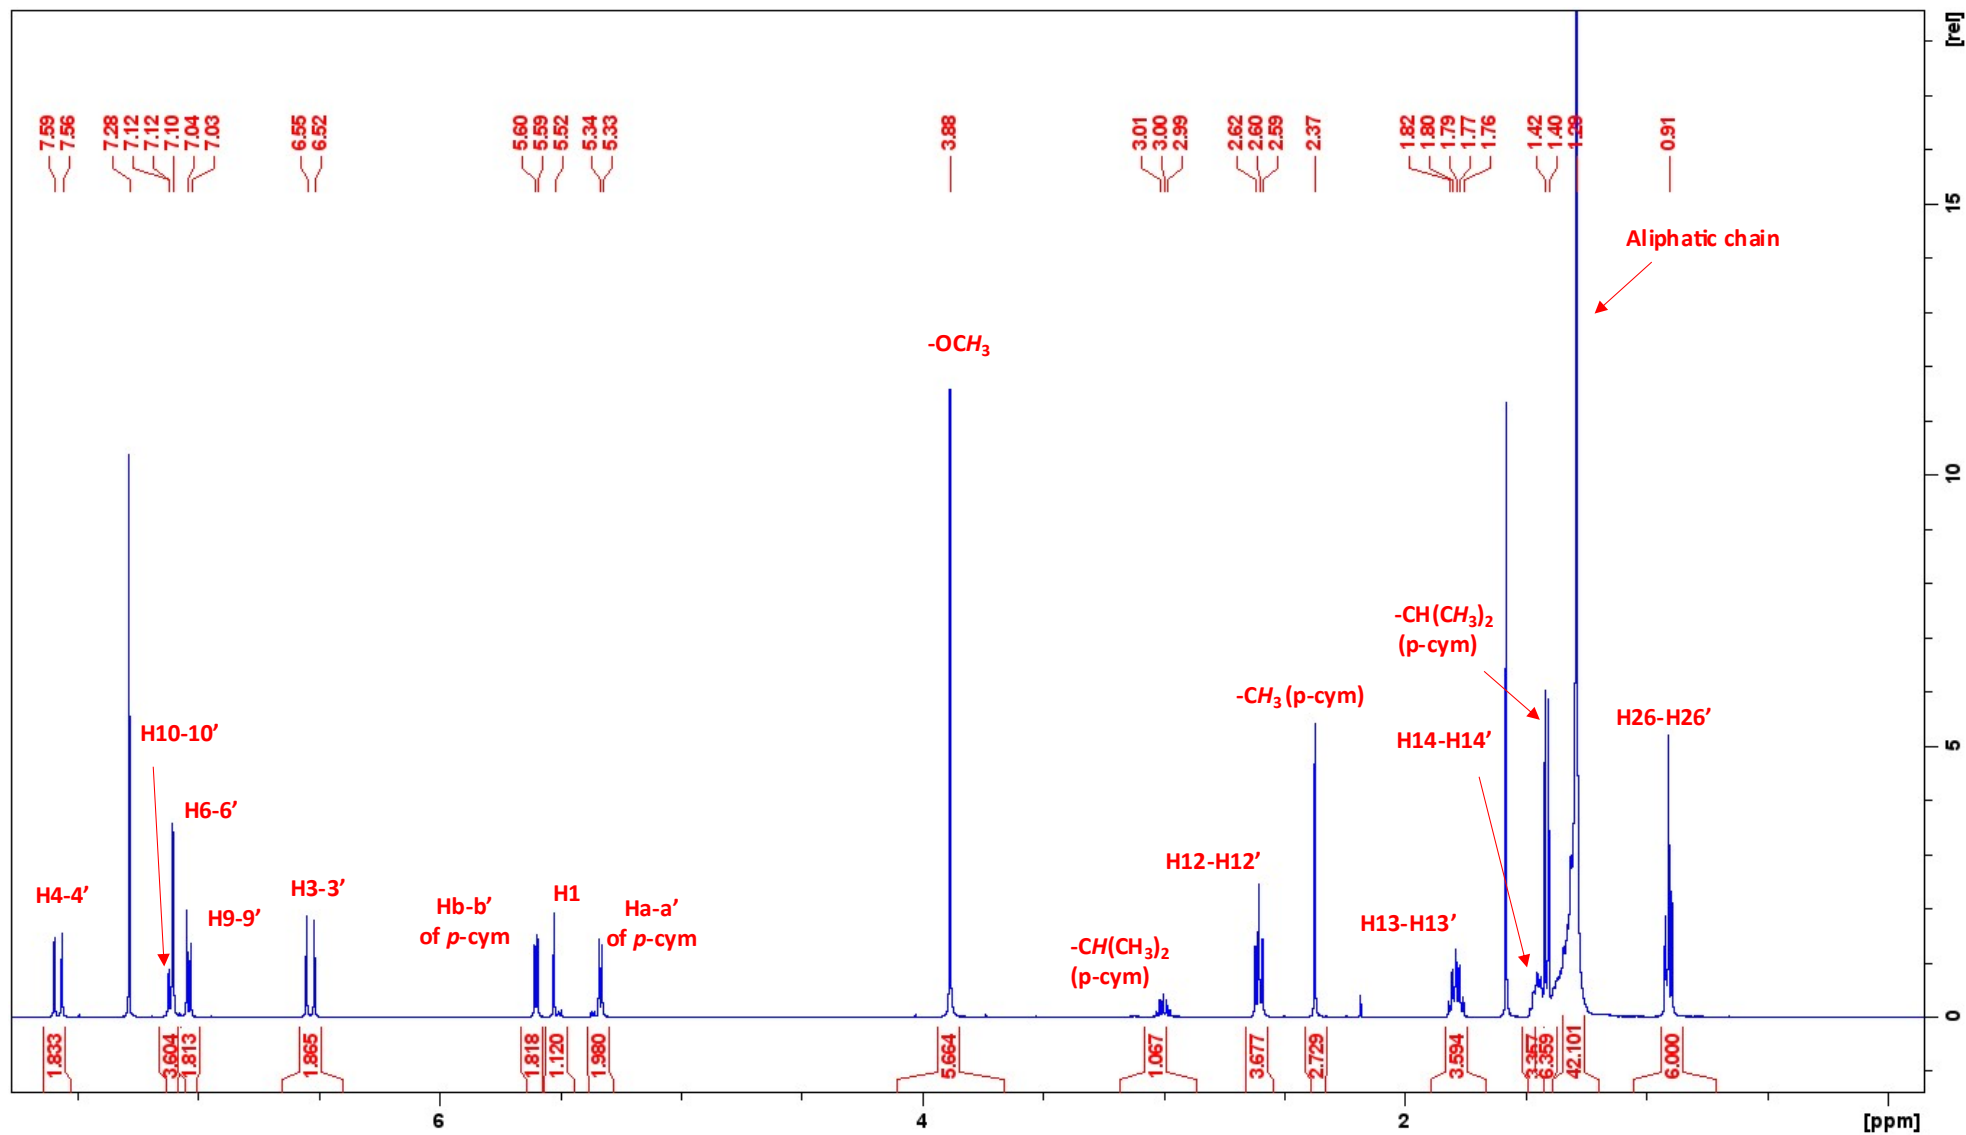

Figure S3. <sup>1</sup>H-NMR of **1** in CDCl<sub>3</sub> at 298 K



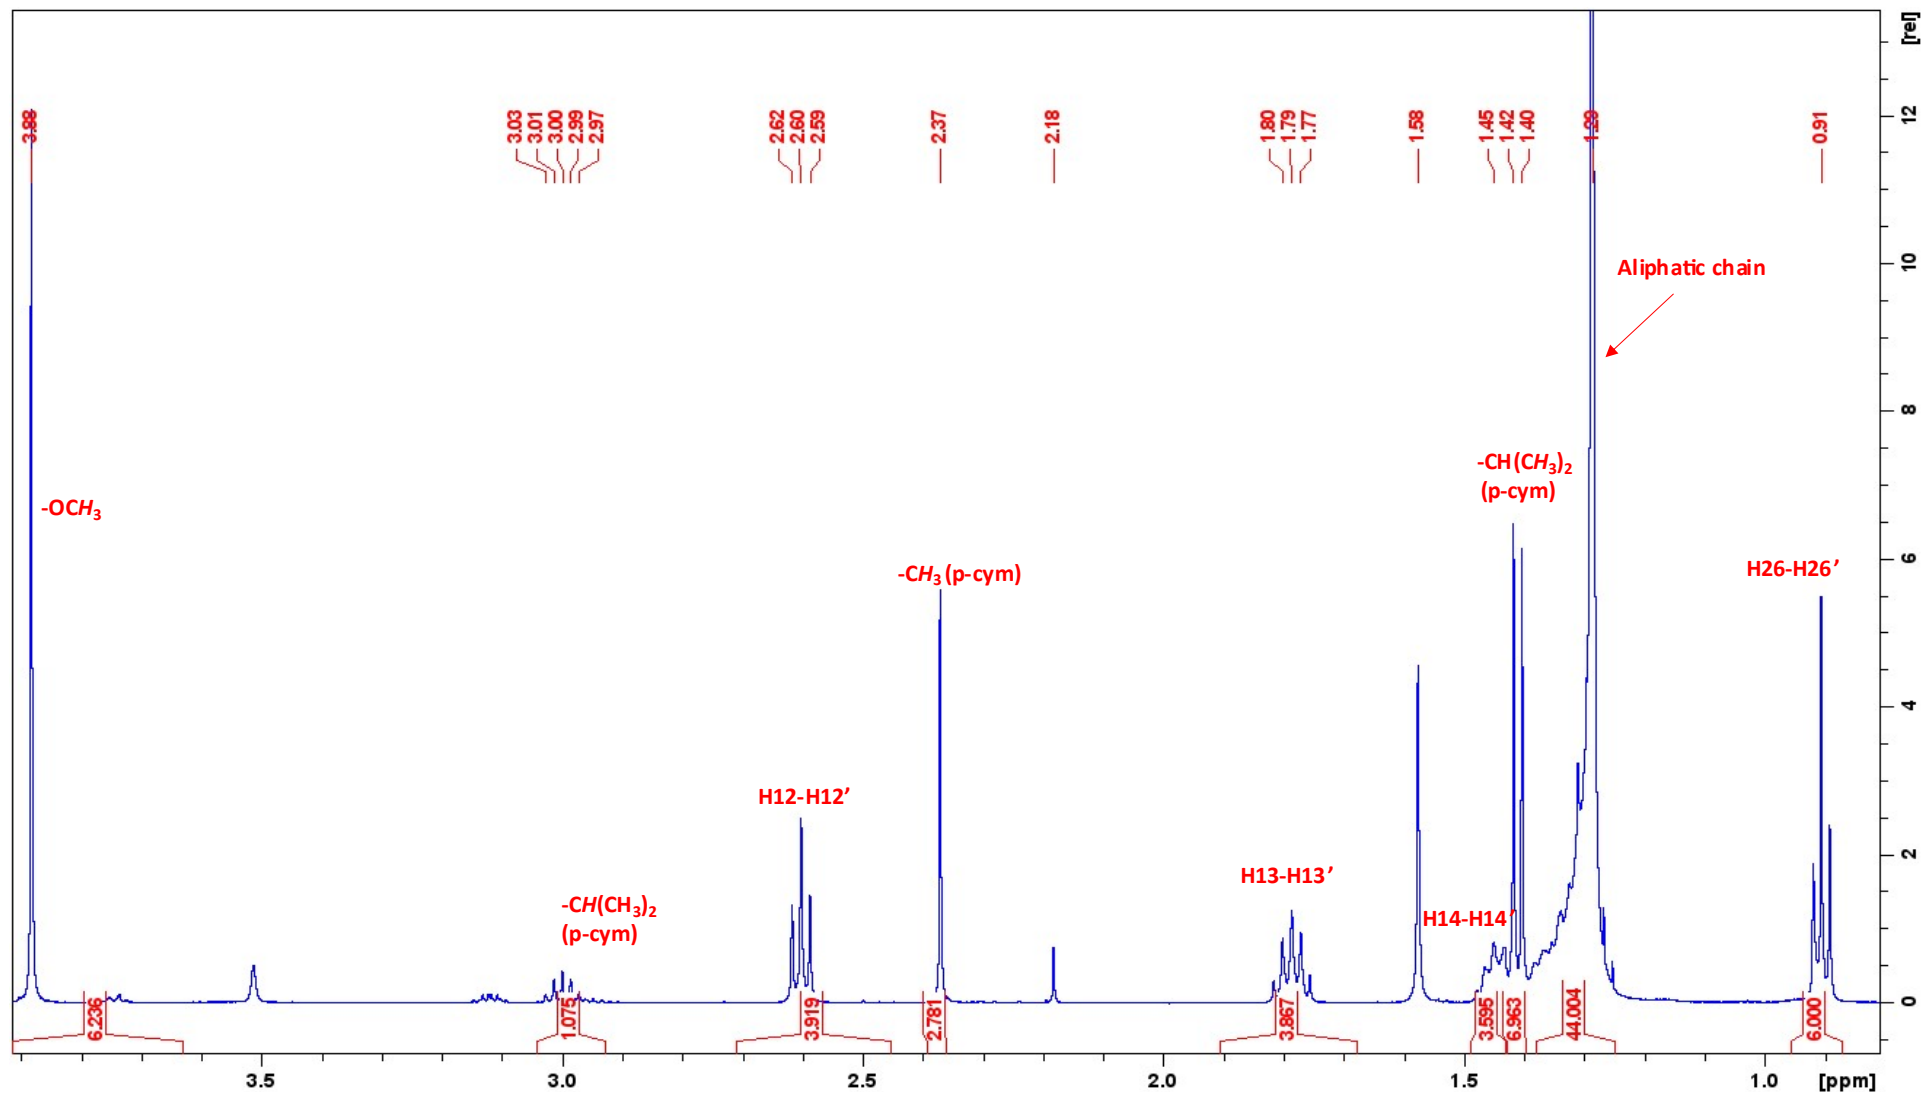

Figure S3 (a). Magnification of <sup>1</sup>H-NMR (range 1-4 ppm)

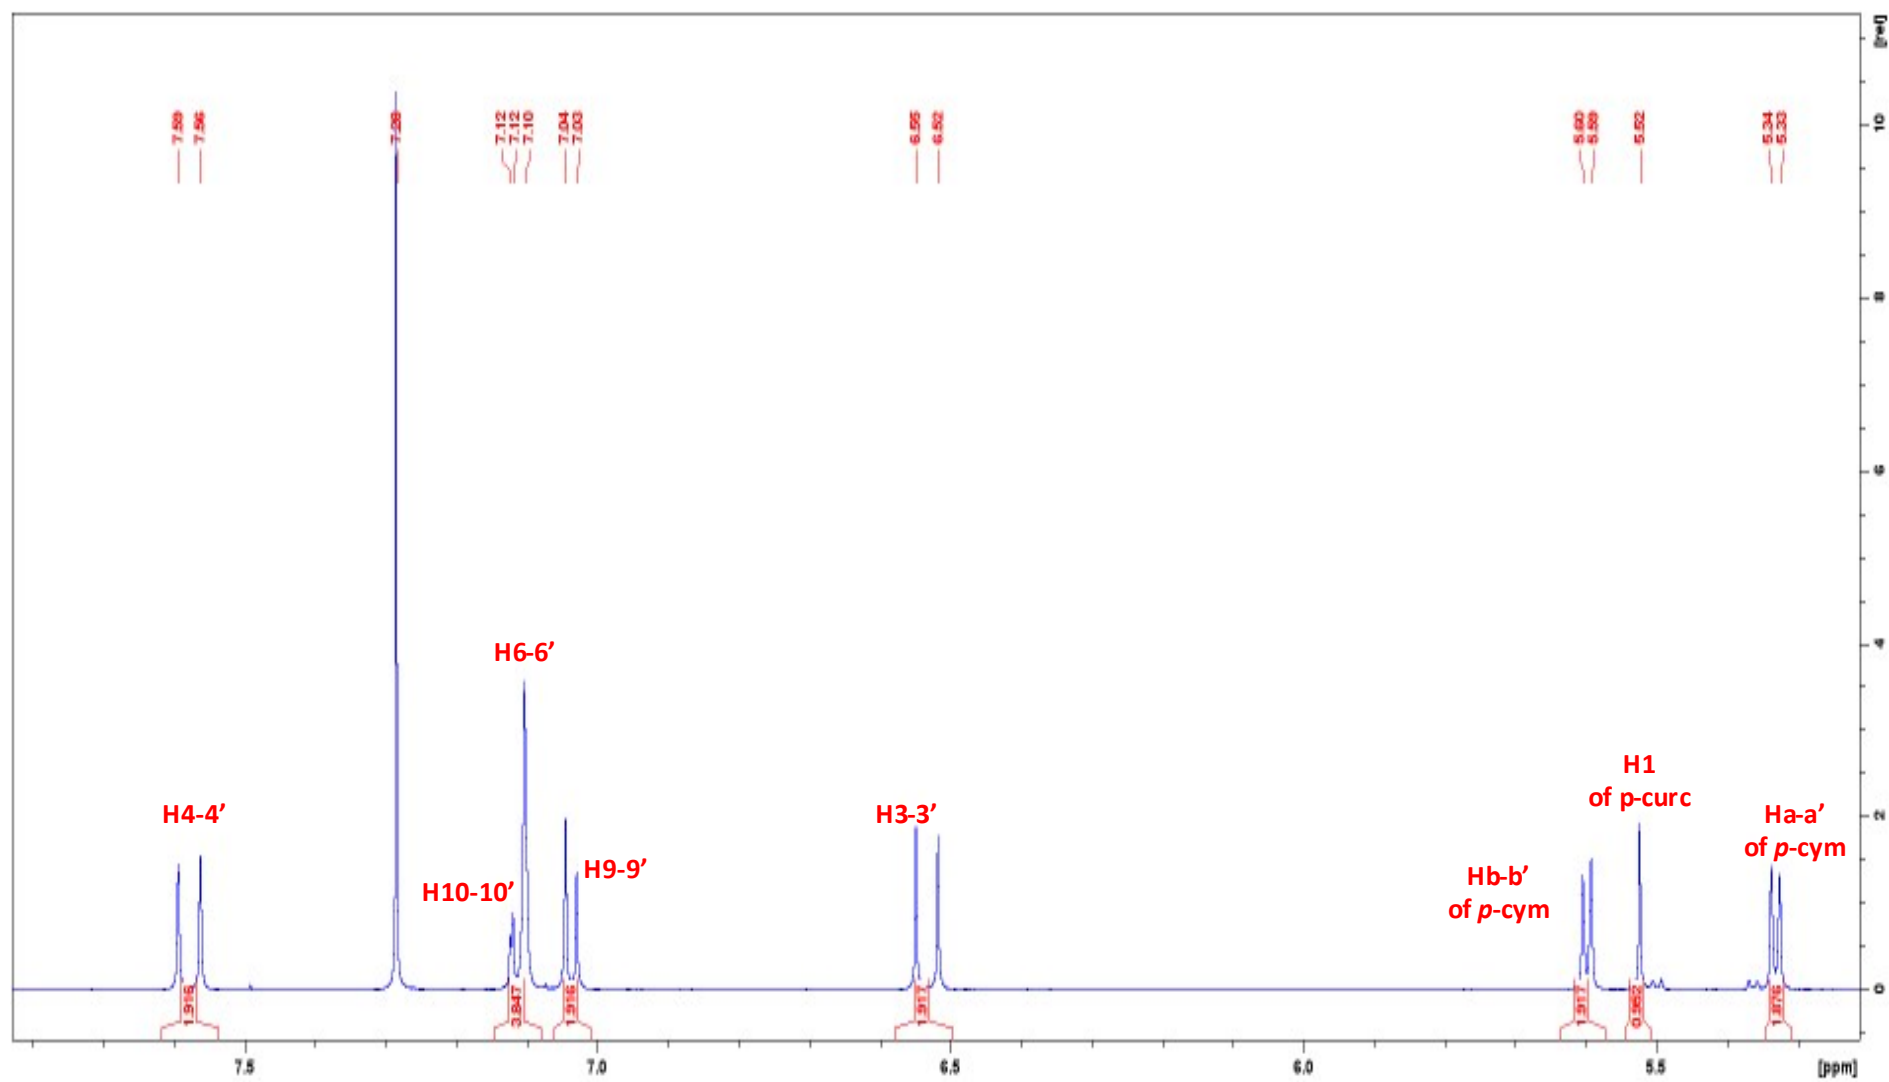

**Figure S3 (b).** Magnification of <sup>1</sup>H-NMR (range 4-8 ppm)

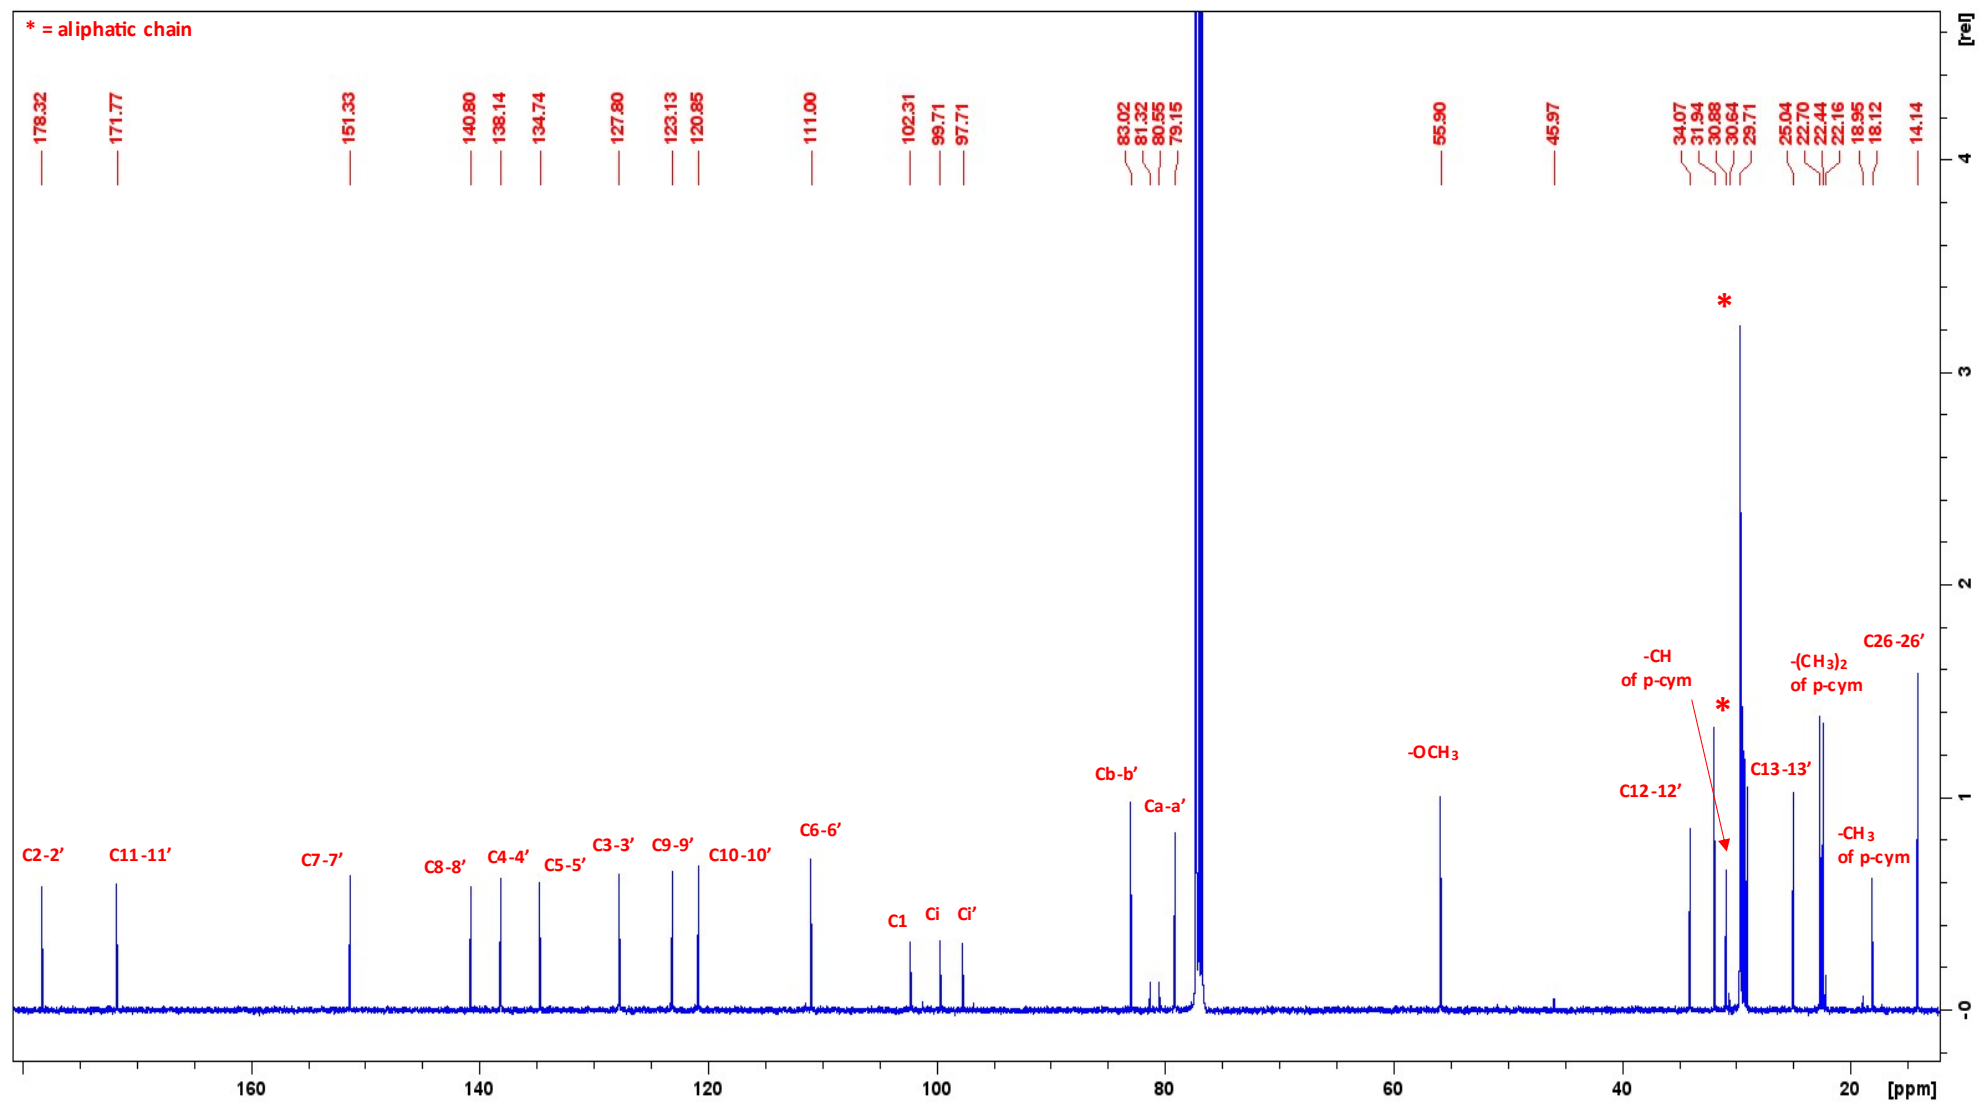

Figure S4. <sup>13</sup>C-NMR of **1** in CDCl<sub>3</sub> at 293 K

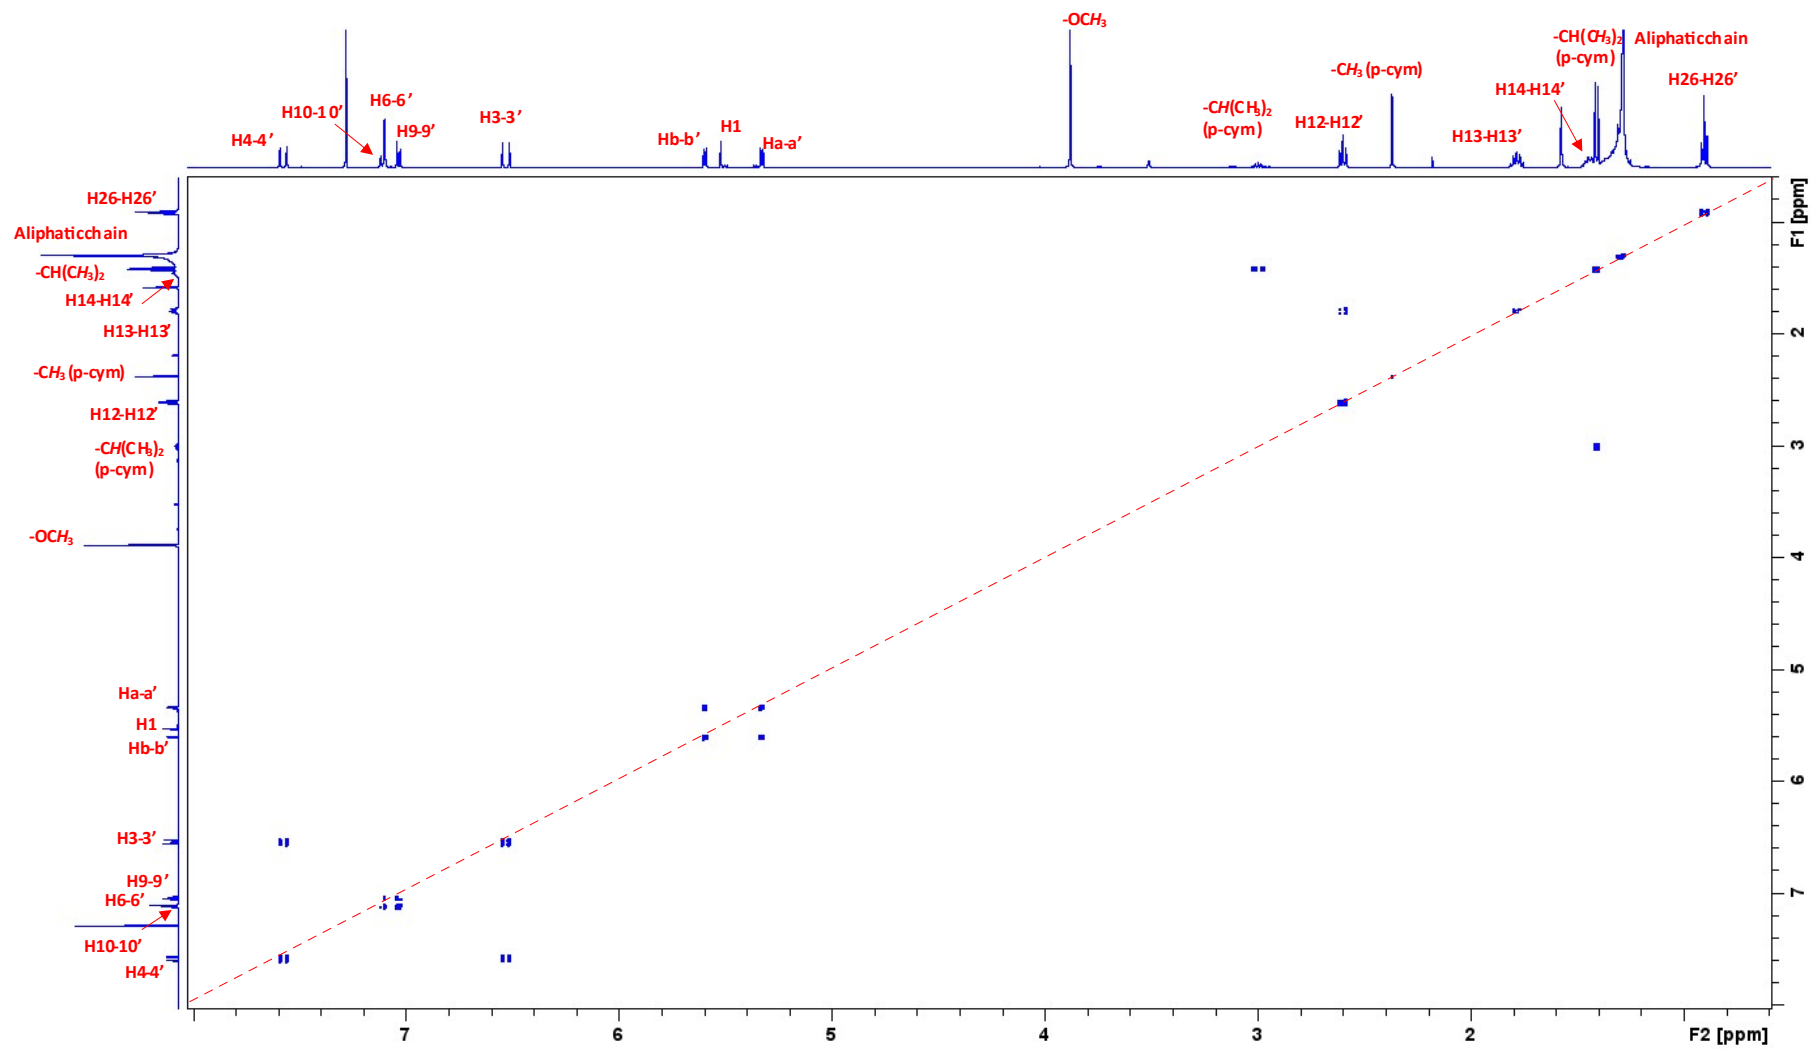

**Figure S5.**  $\{^1\text{H}-^1\text{H}\}$ -COSY NMR of **1** in  $\text{CDCl}_3$  at 293 K

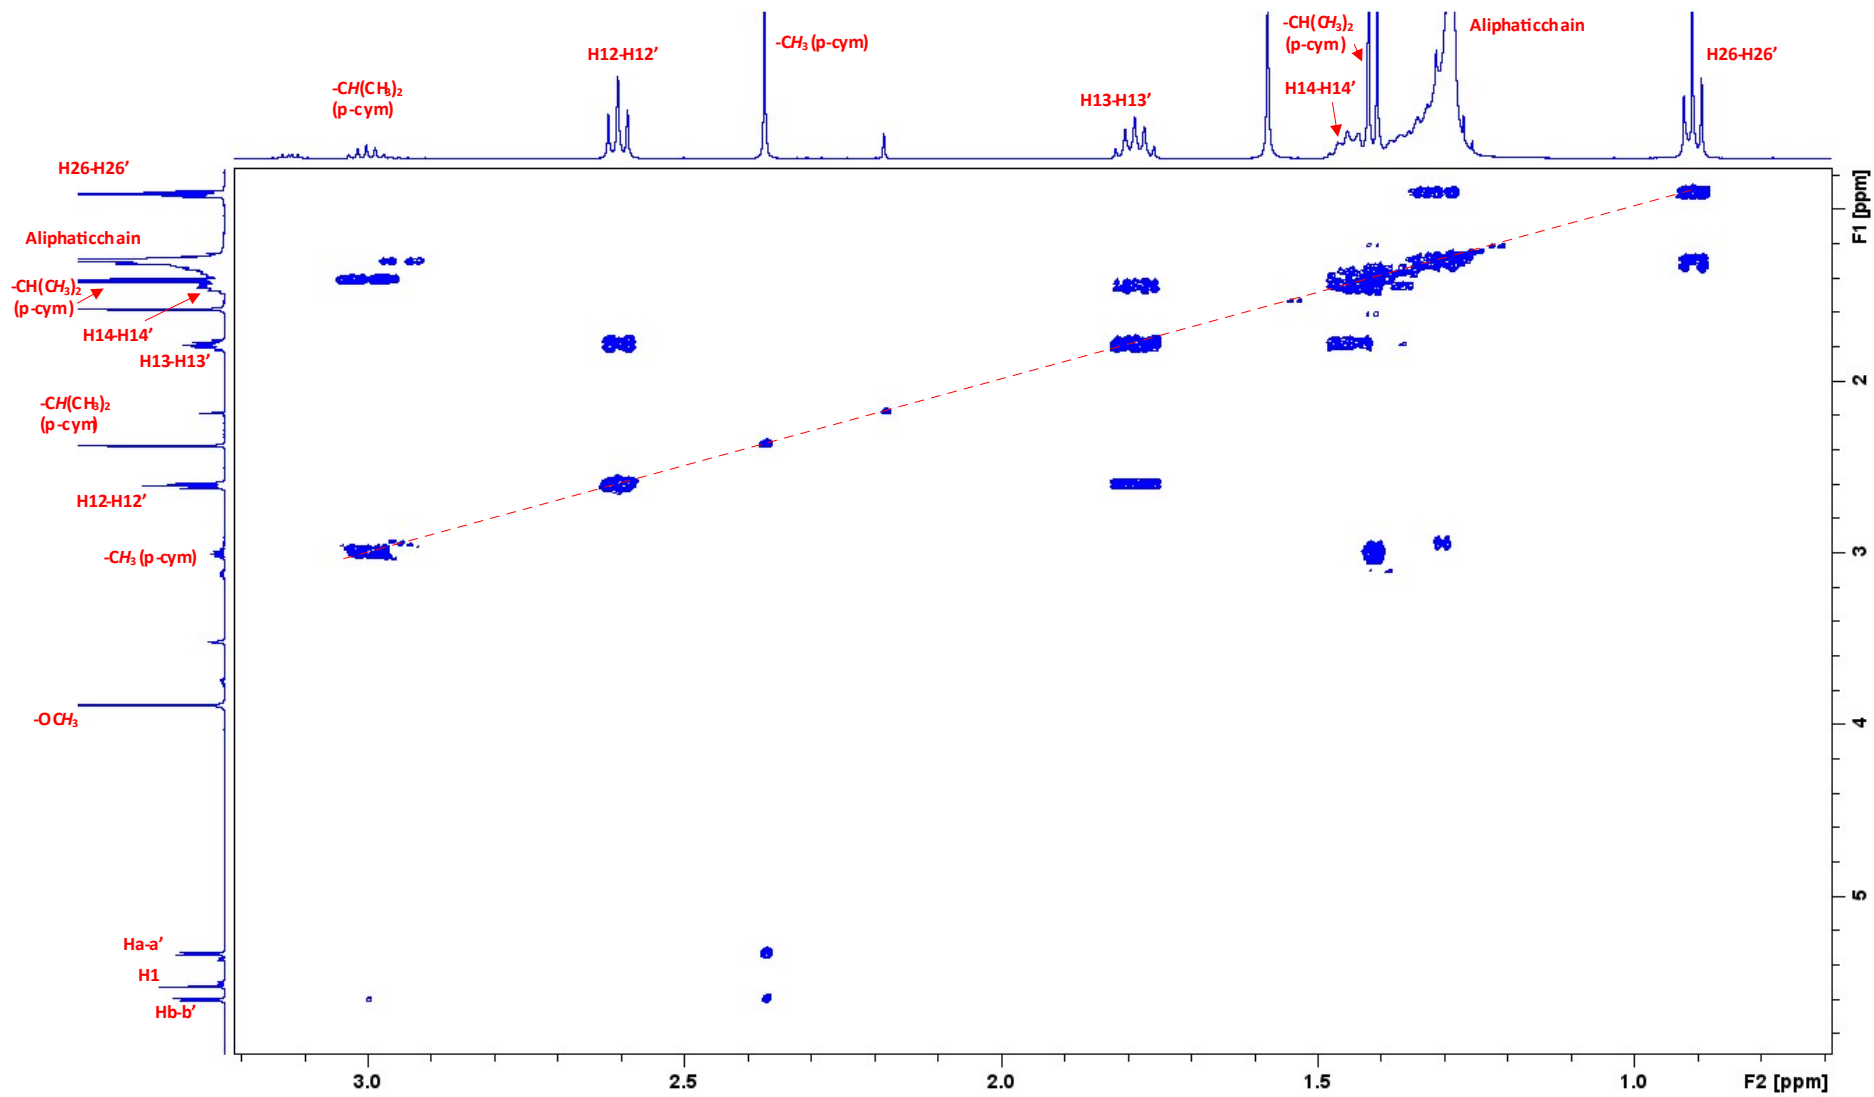

Figure S5 (a). Magnification of  $\{^1\text{H}-^1\text{H}\}$ -COSY NMR

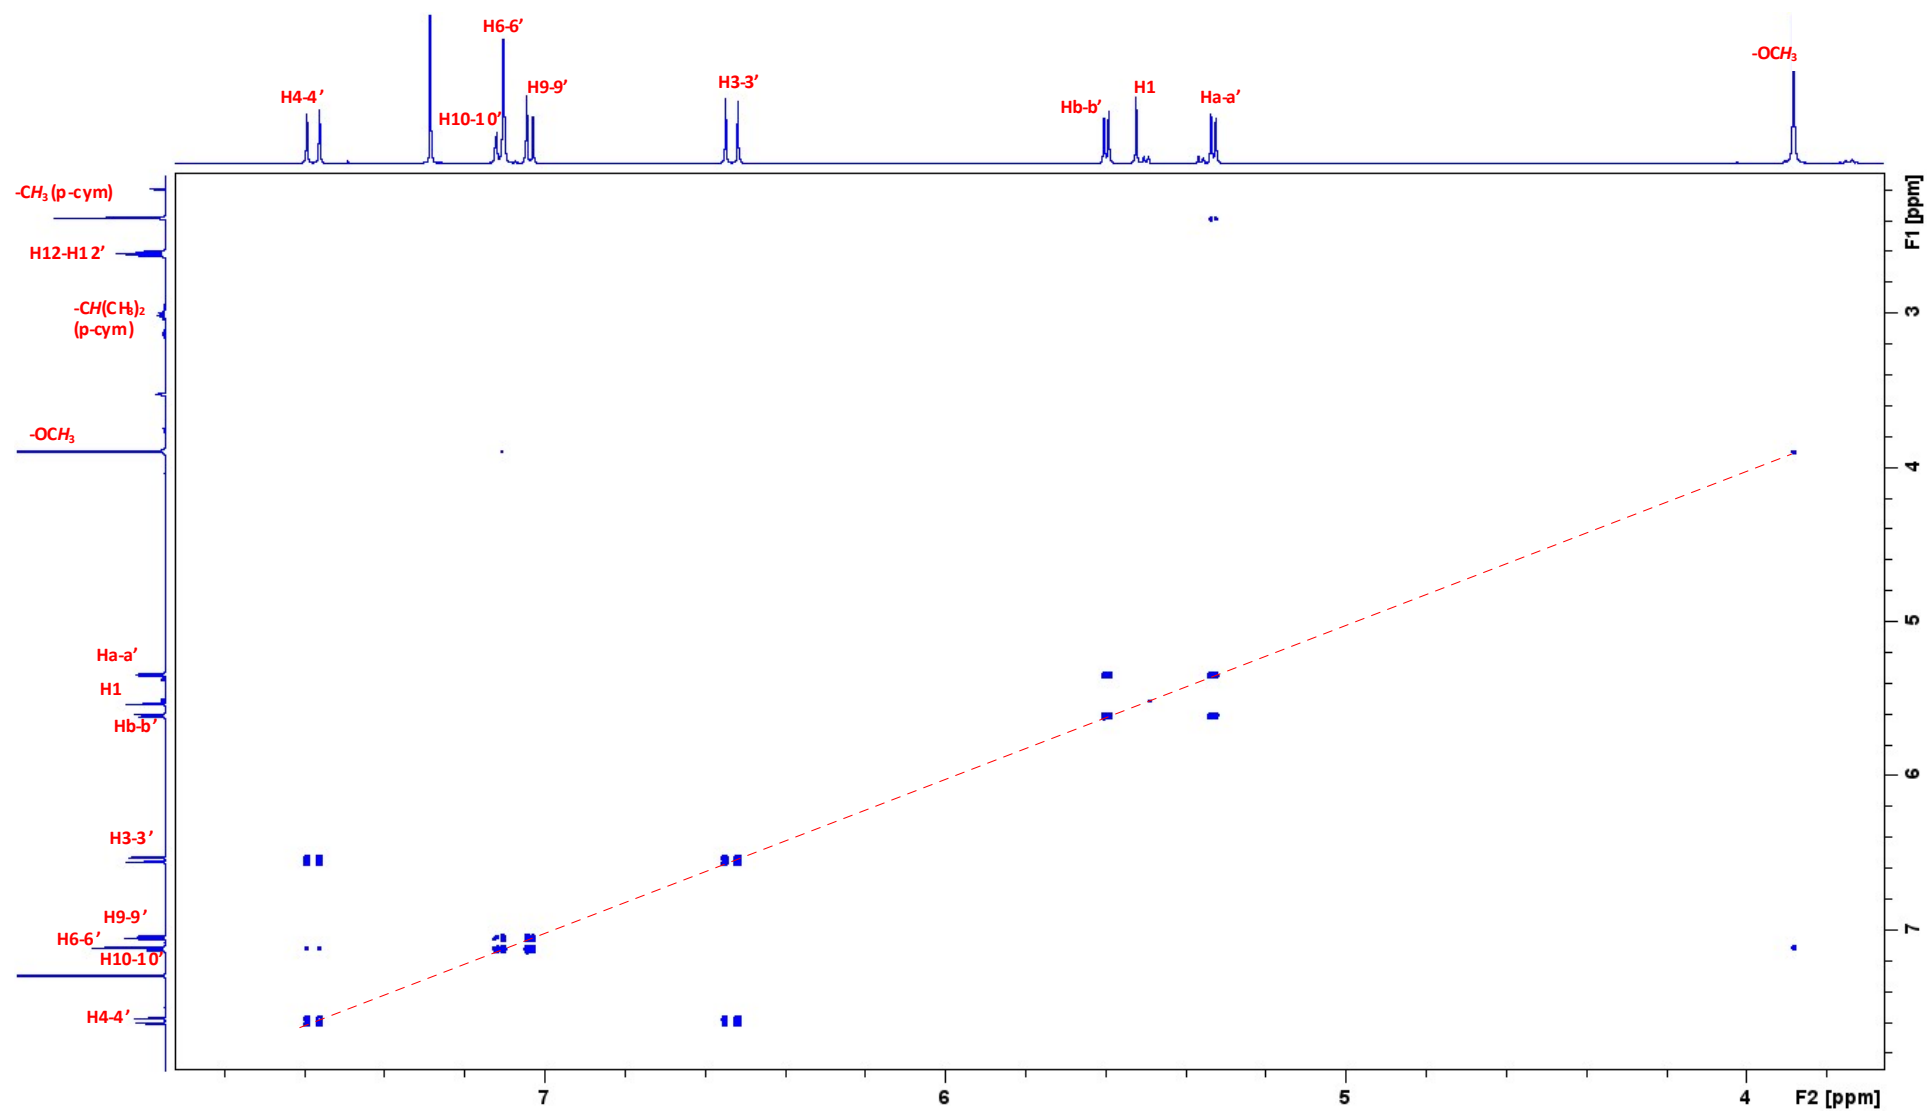

Figure S5 (b). Magnification of  $\{^1\text{H}-^1\text{H}\}$ -COSY NMR

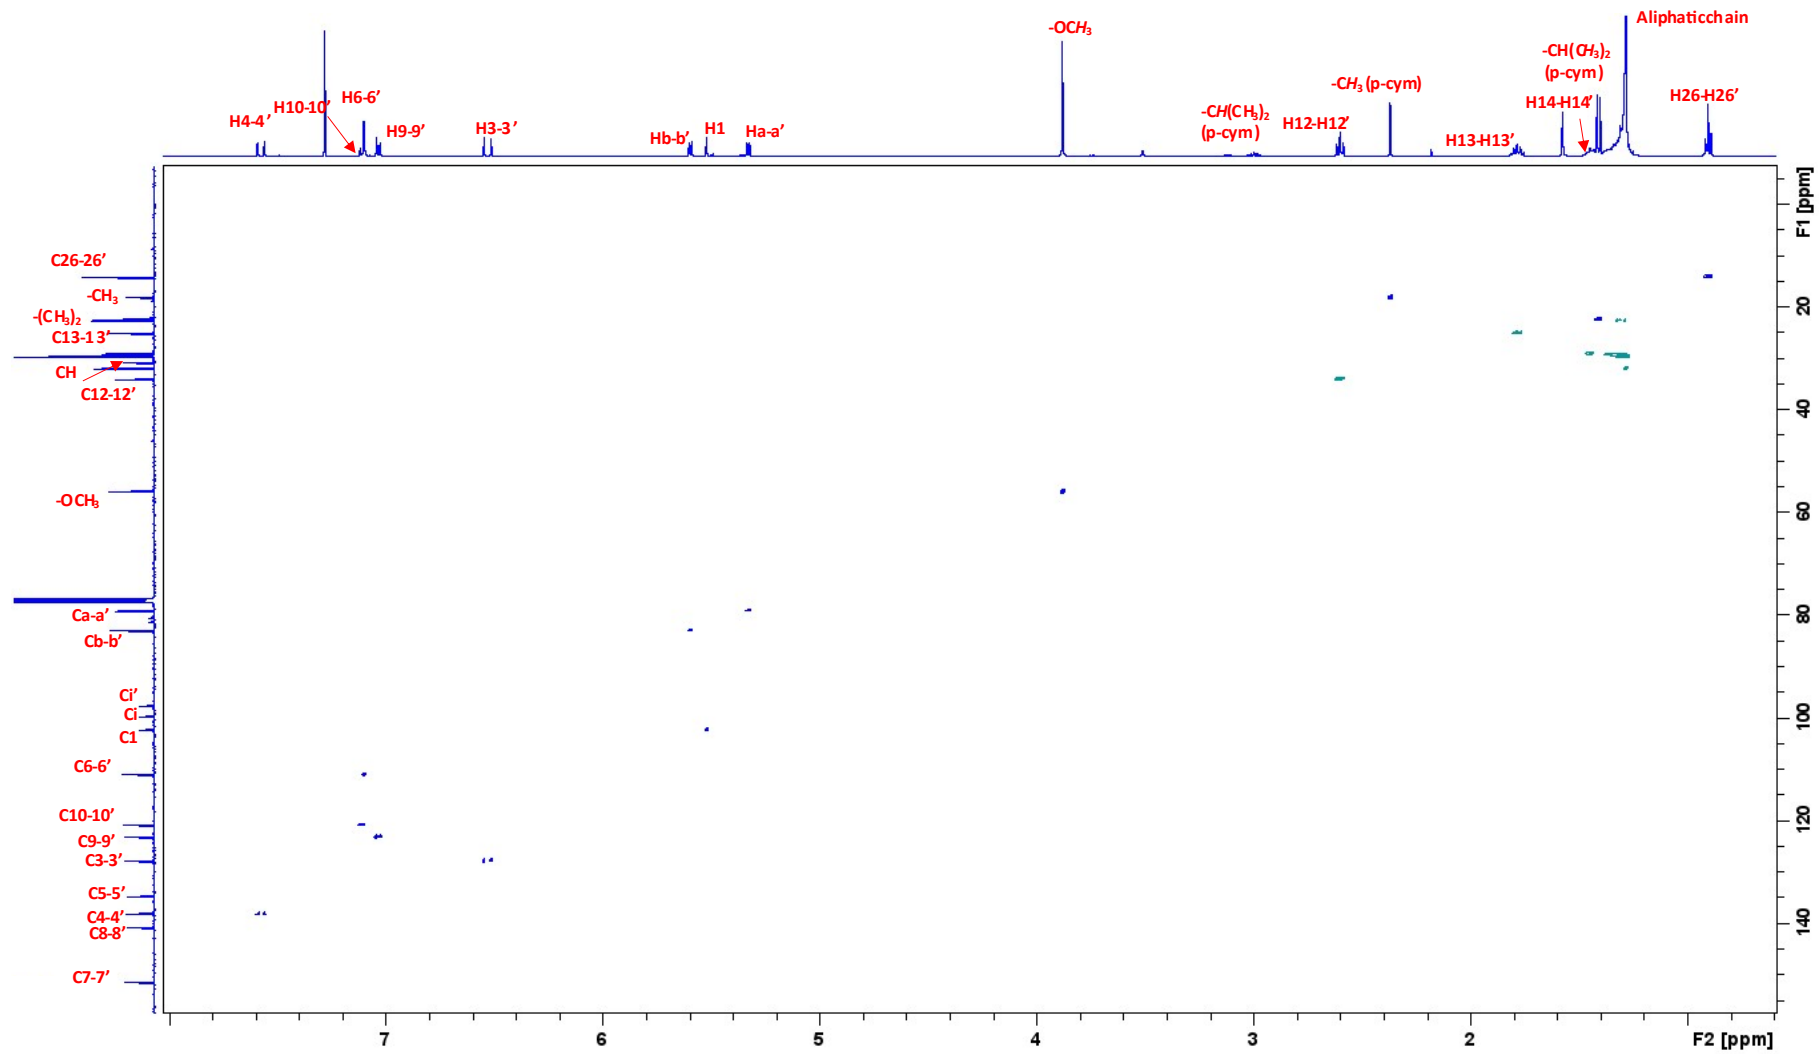

Figure S6.  $\{^1\text{H}-^{13}\text{C}\}$ -HSQC NMR of **1** in  $\text{CDCl}_3$  at 293 K

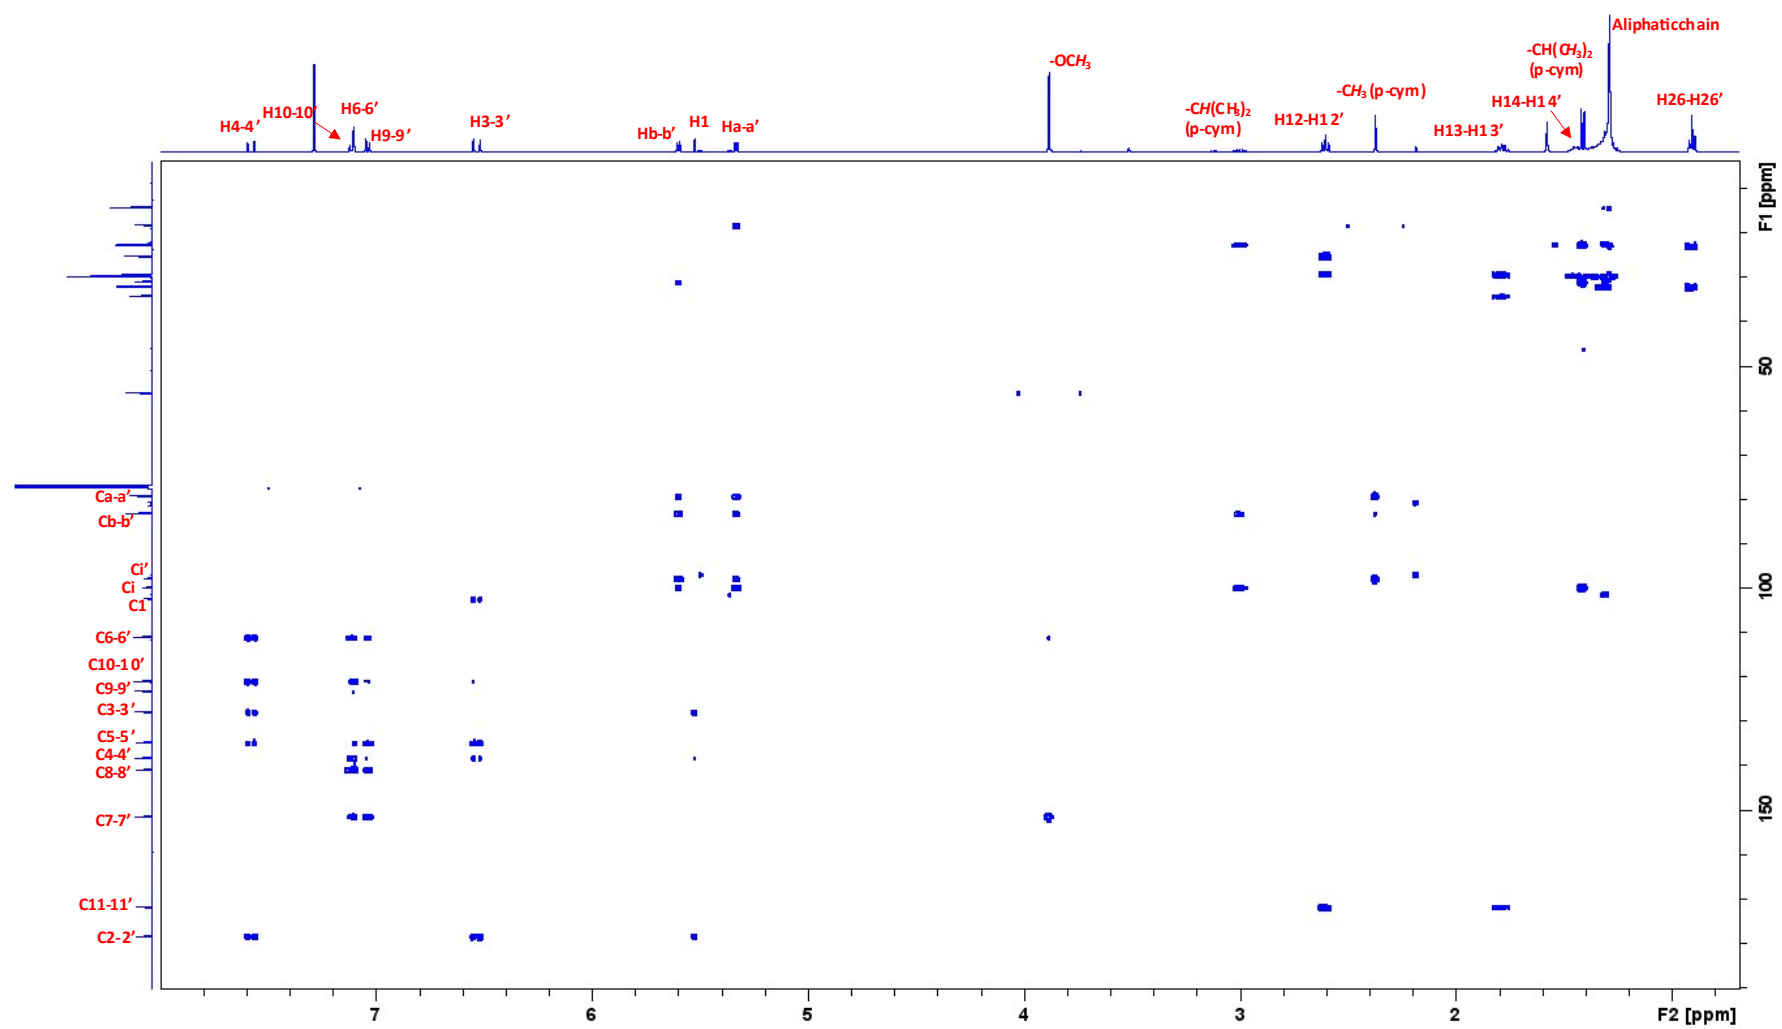

**Figure S7.**  $\{^1\text{H}-^{13}\text{C}\}$ -HMBC NMR of **1** in  $\text{CDCl}_3$  at 293 K



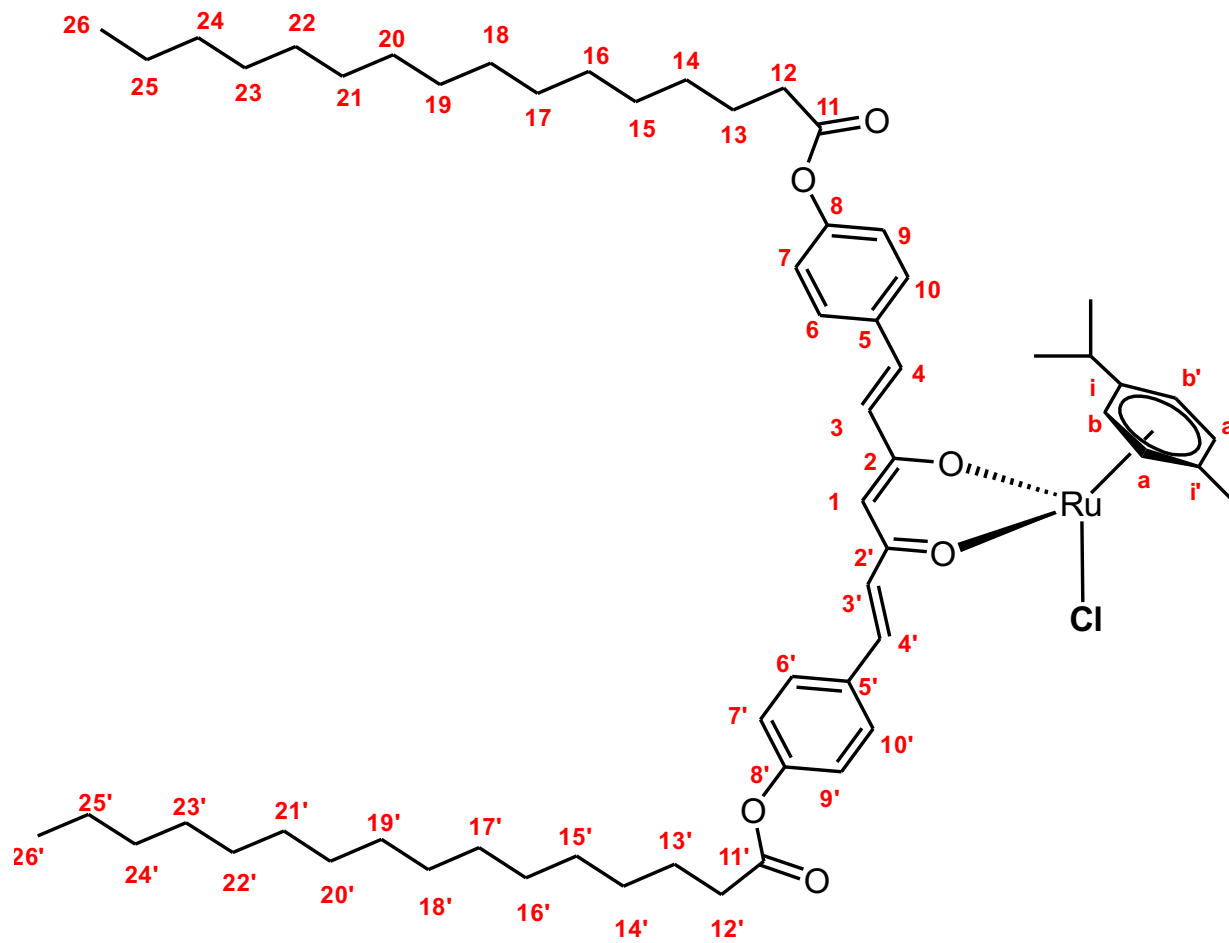

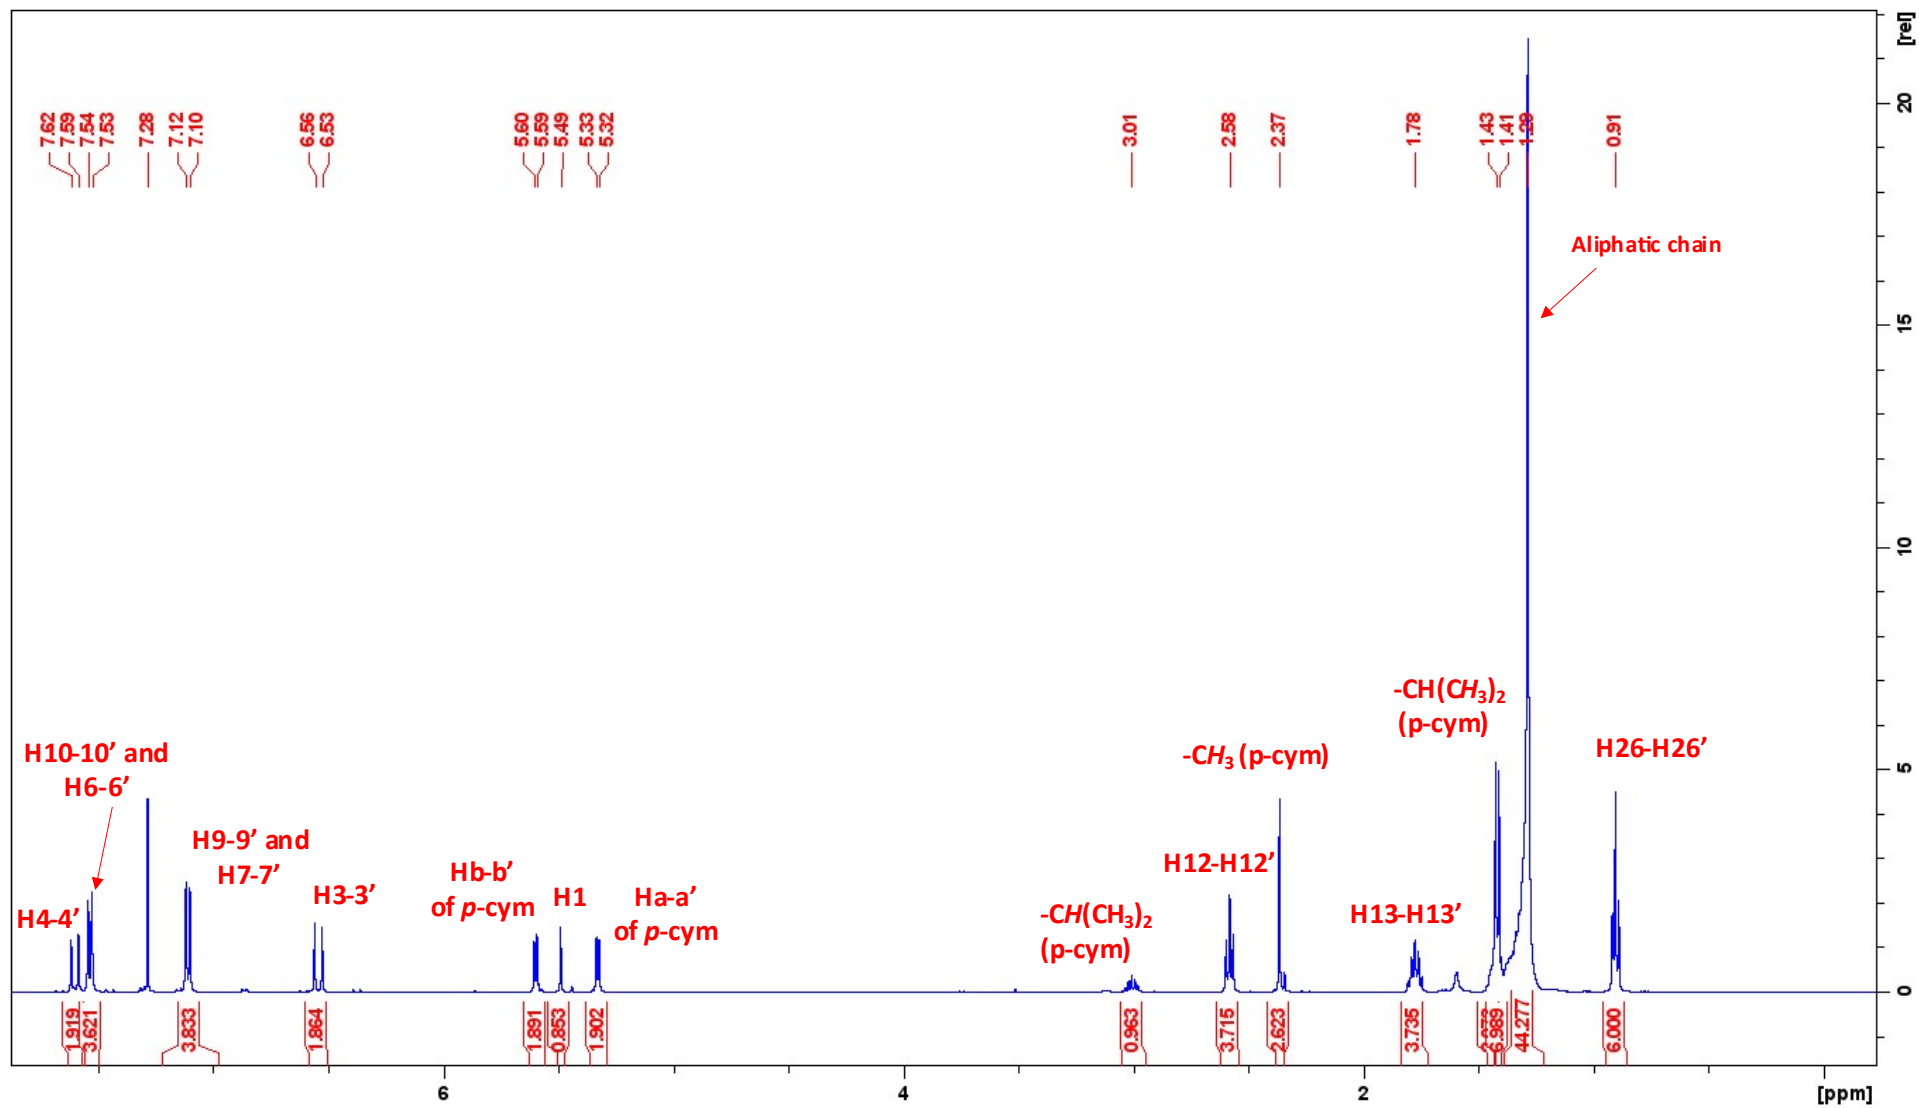

Figure S8.  $^1\text{H-NMR}$  of **2** in  $\text{CDCl}_3$  at 293 K

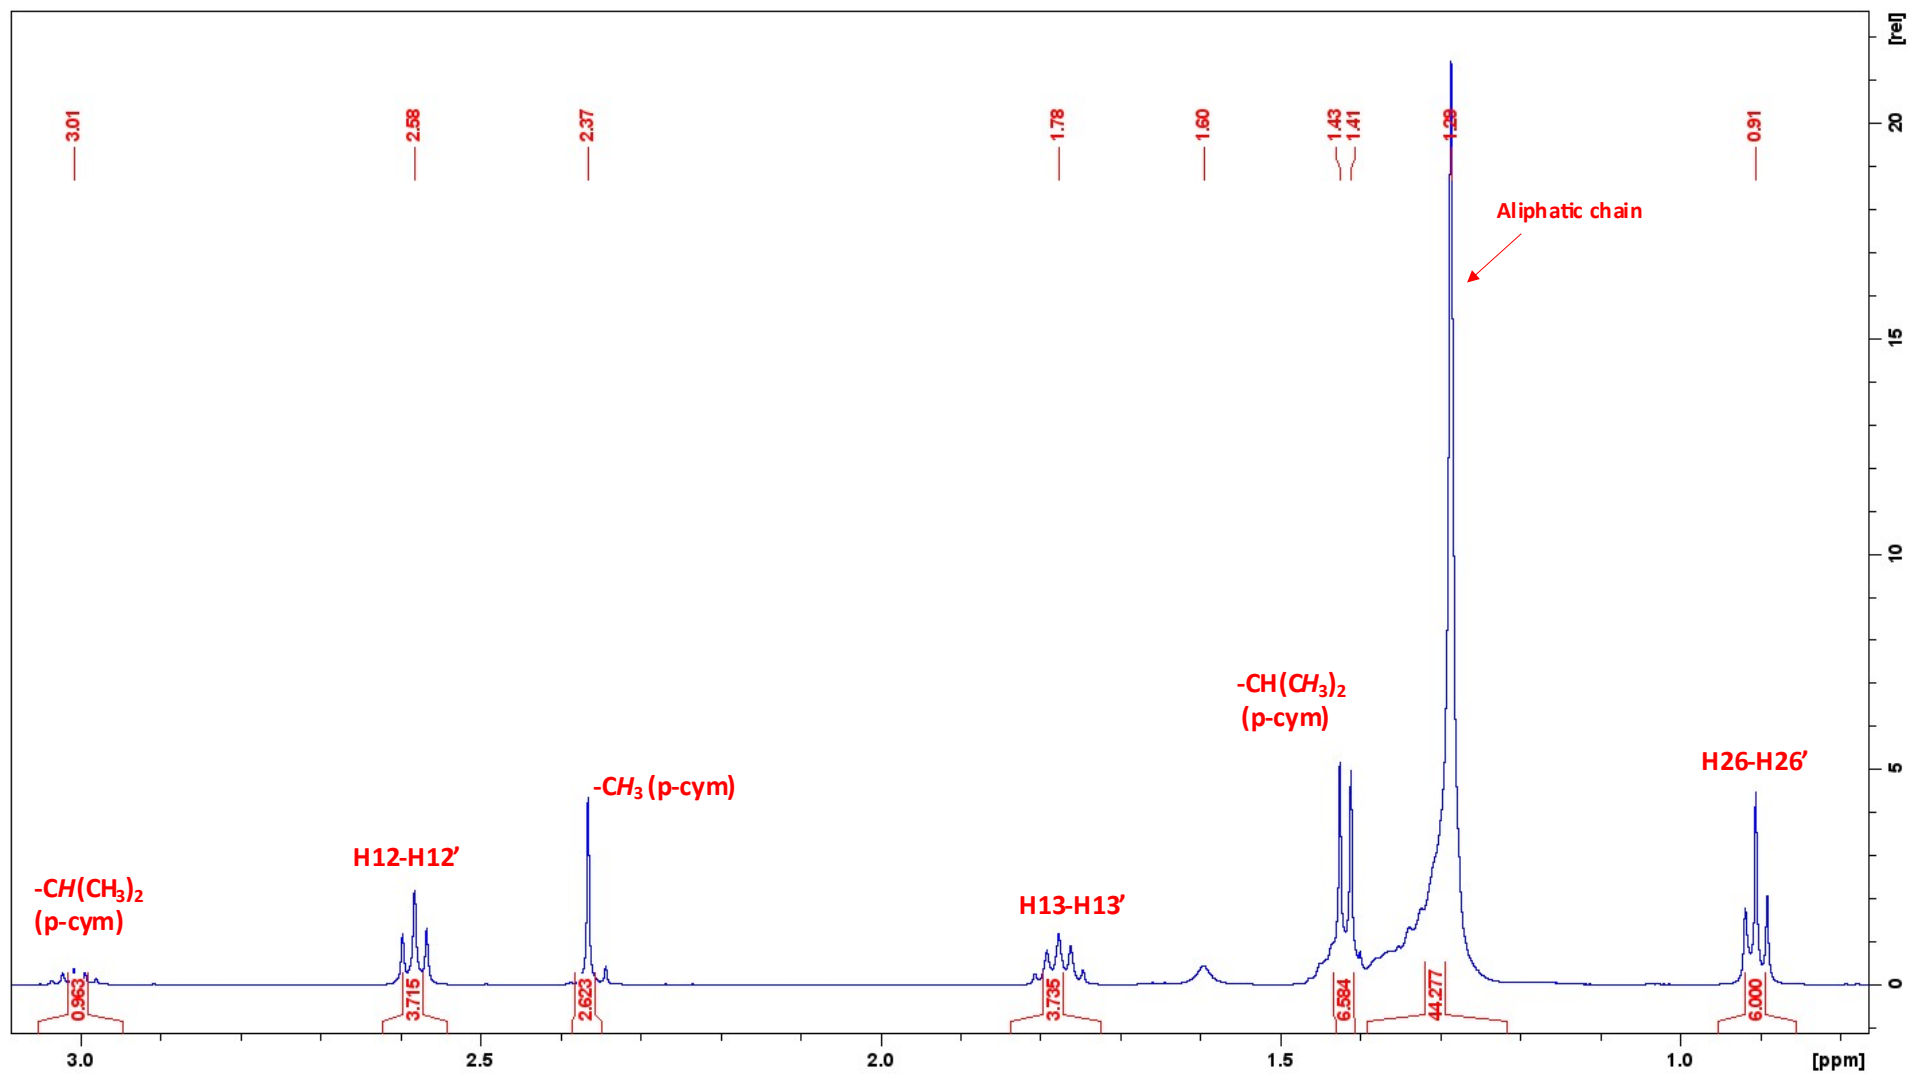

Figure S8 (a). Magnification of <sup>1</sup>H-NMR (1-3 ppm)

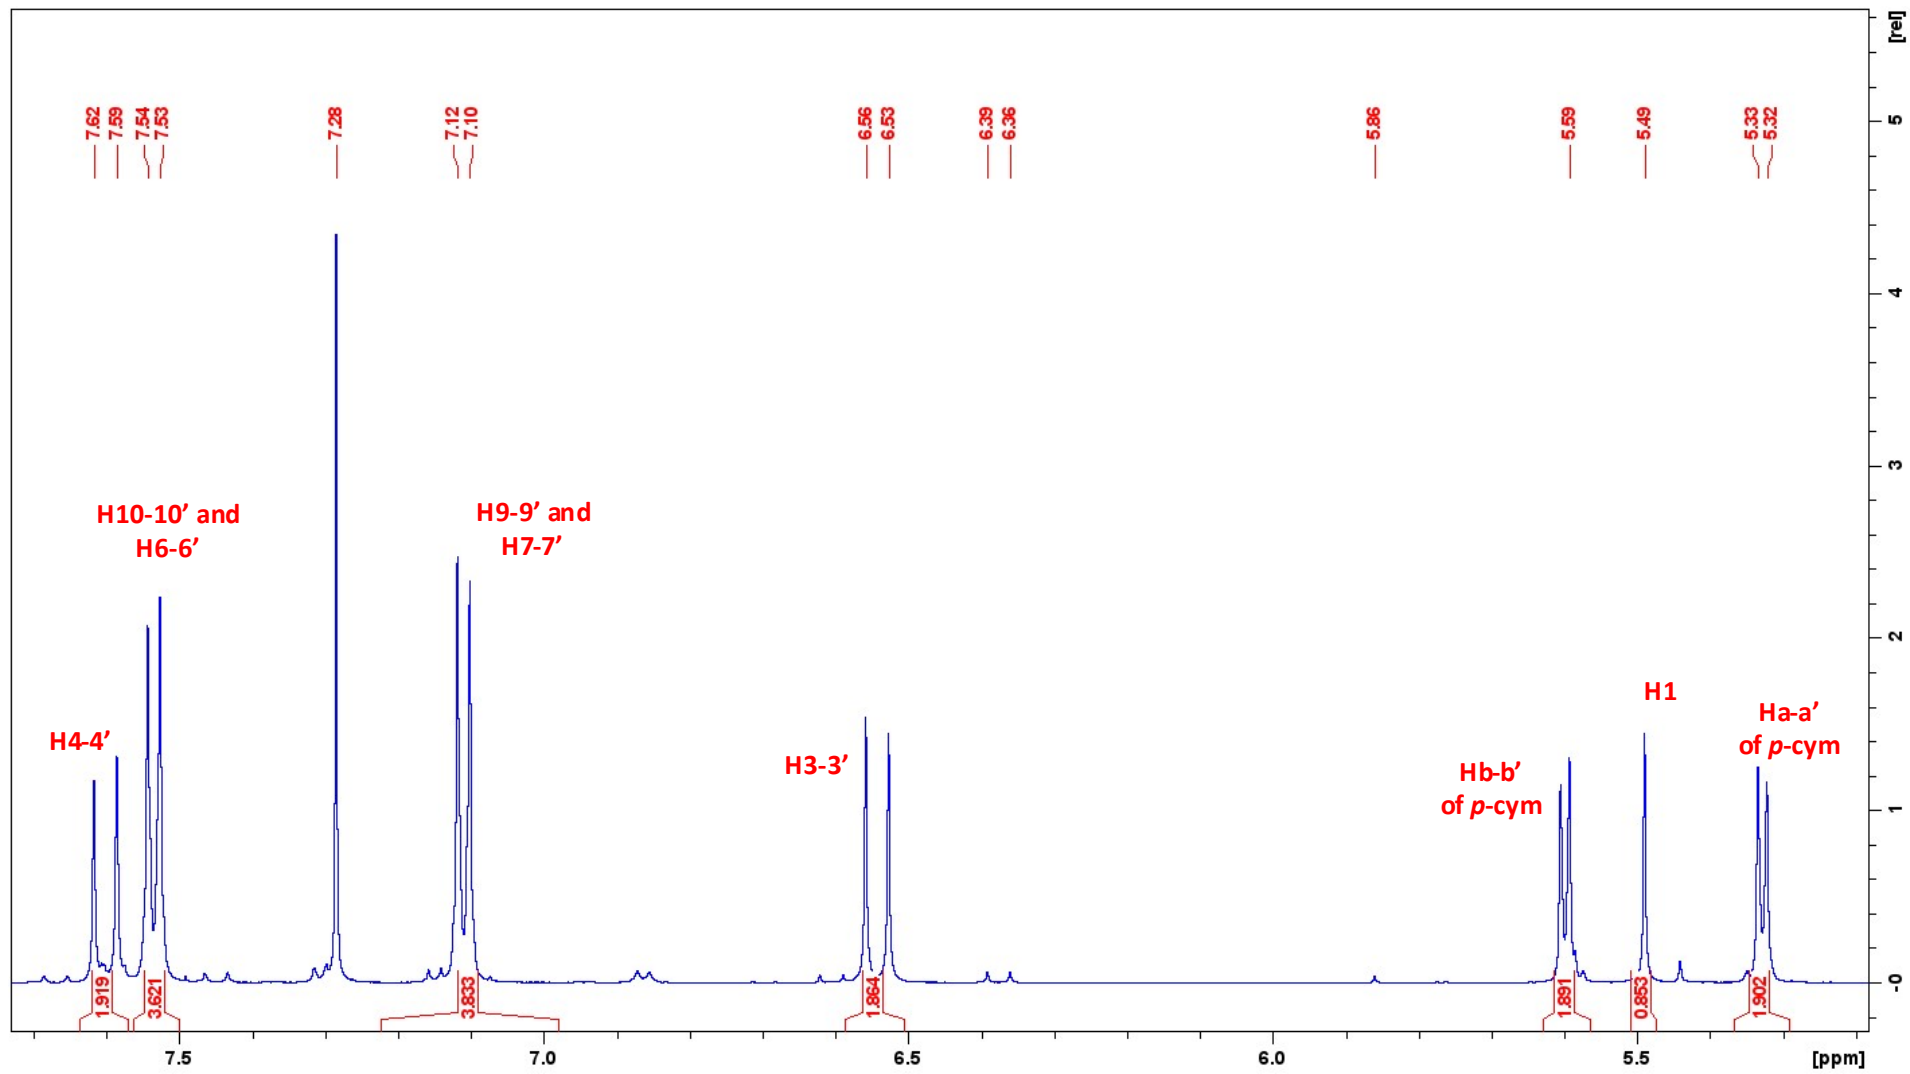

Figure S8 (b). Magnification of <sup>1</sup>H-NMR (4-8 ppm)

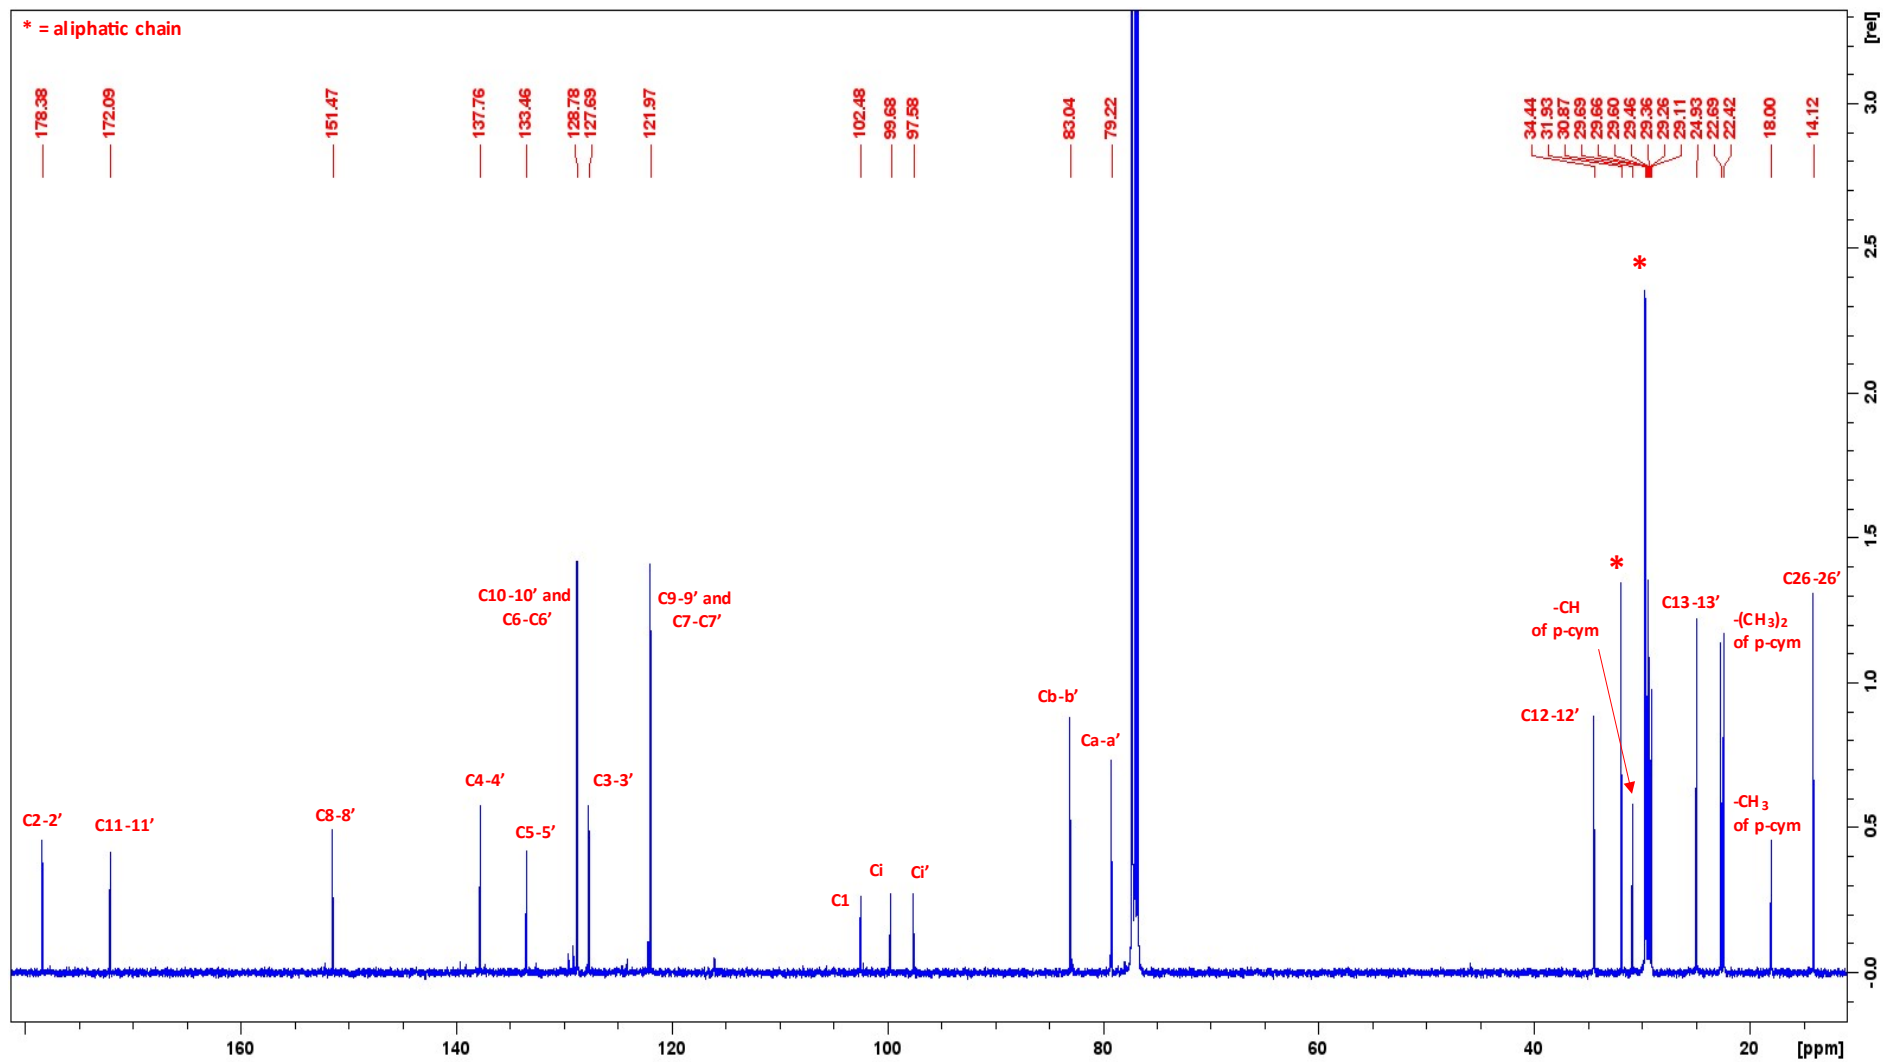

Figure S9.  $^{13}\text{C}$ -NMR of **2** in  $\text{CDCl}_3$  at 293 K

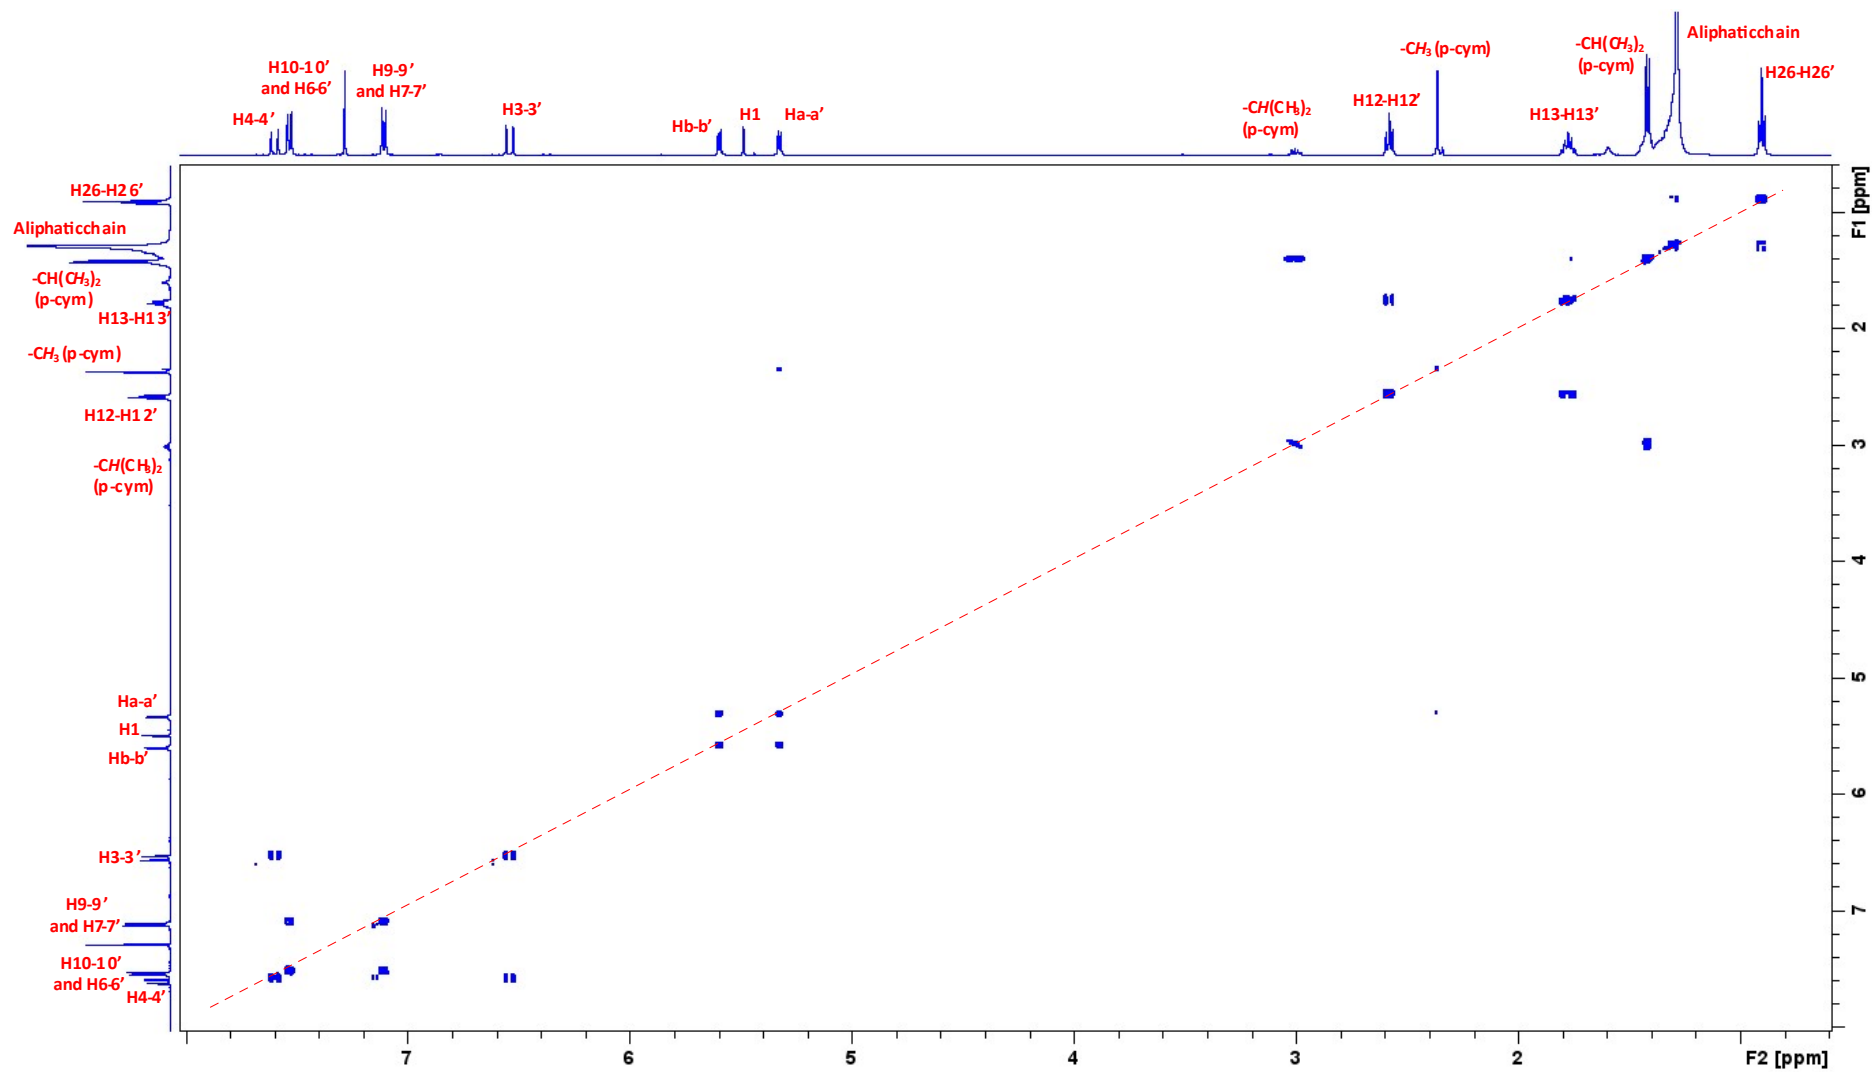

Figure S10.  $\{^1\text{H}-^1\text{H}\}$ -COSY NMR of **2** in  $\text{CDCl}_3$  at 293 K

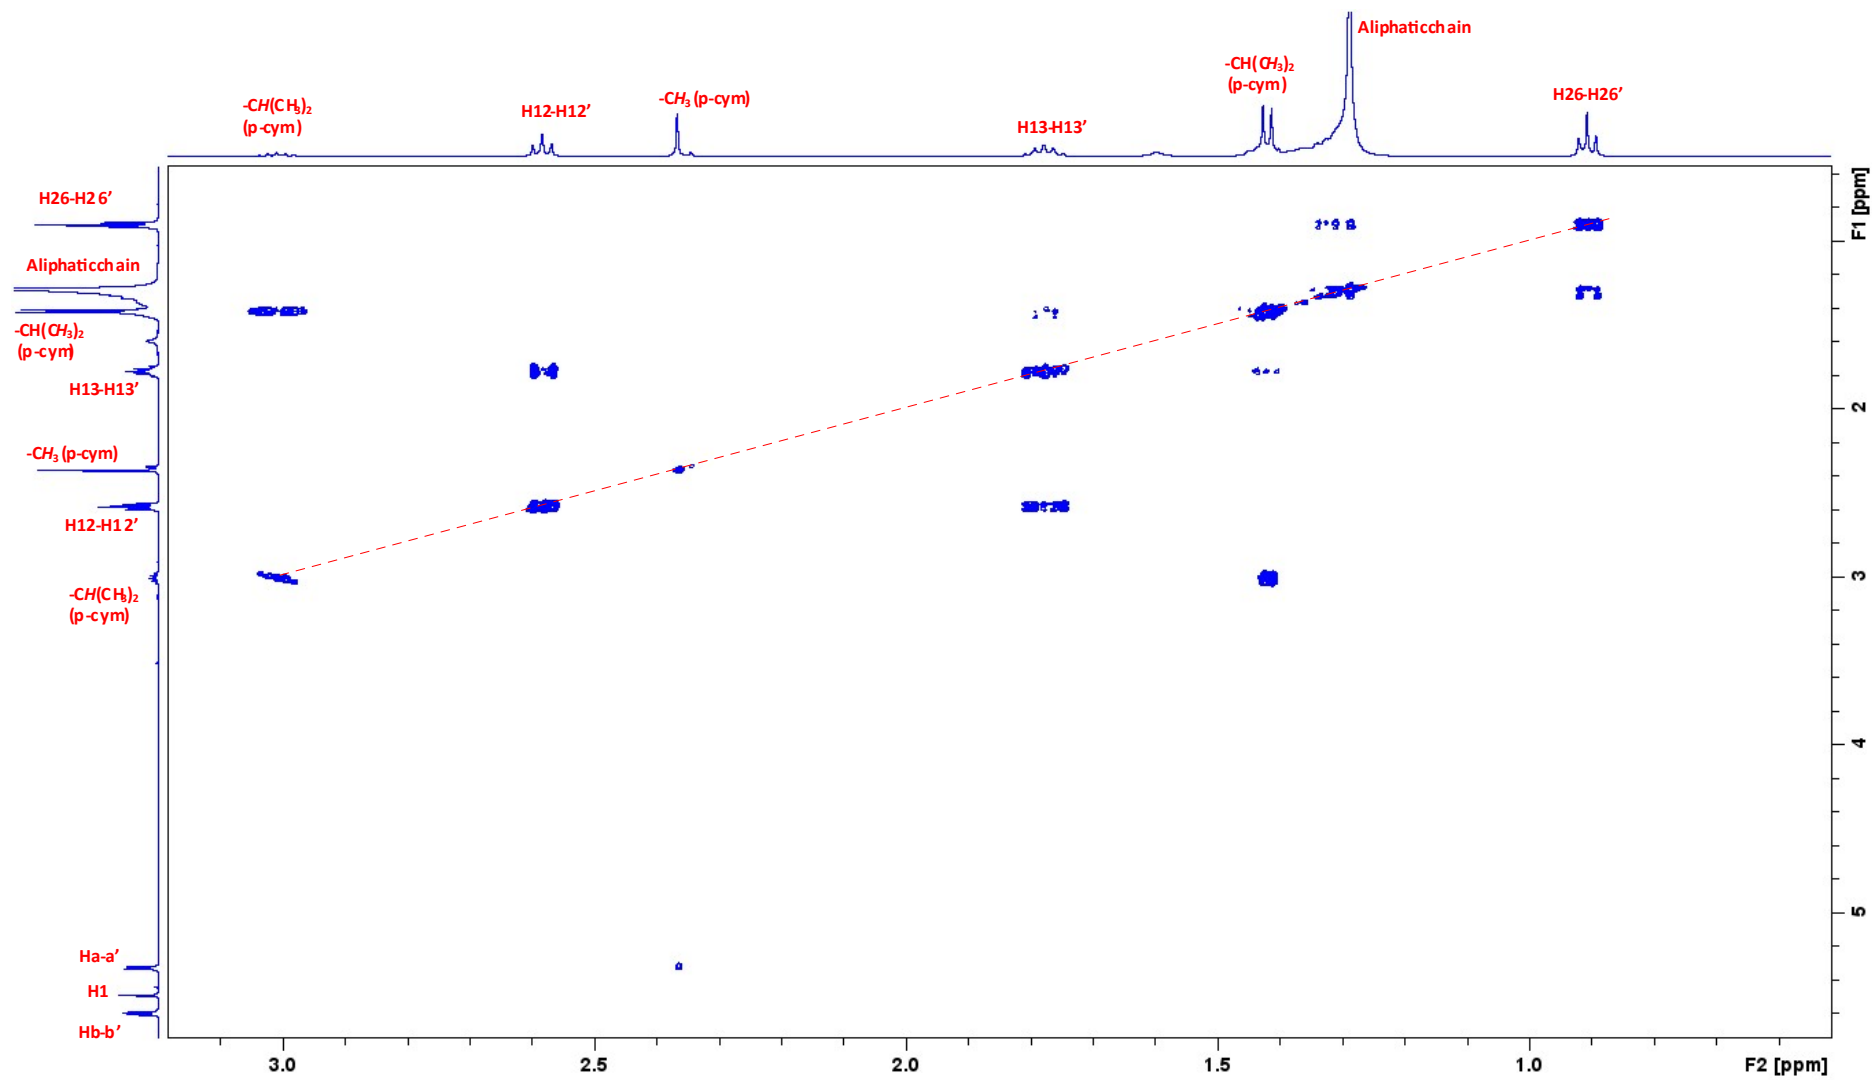

Figure S10 (a). Magnification of  $\{^1\text{H}-^1\text{H}\}$ -COSY NMR

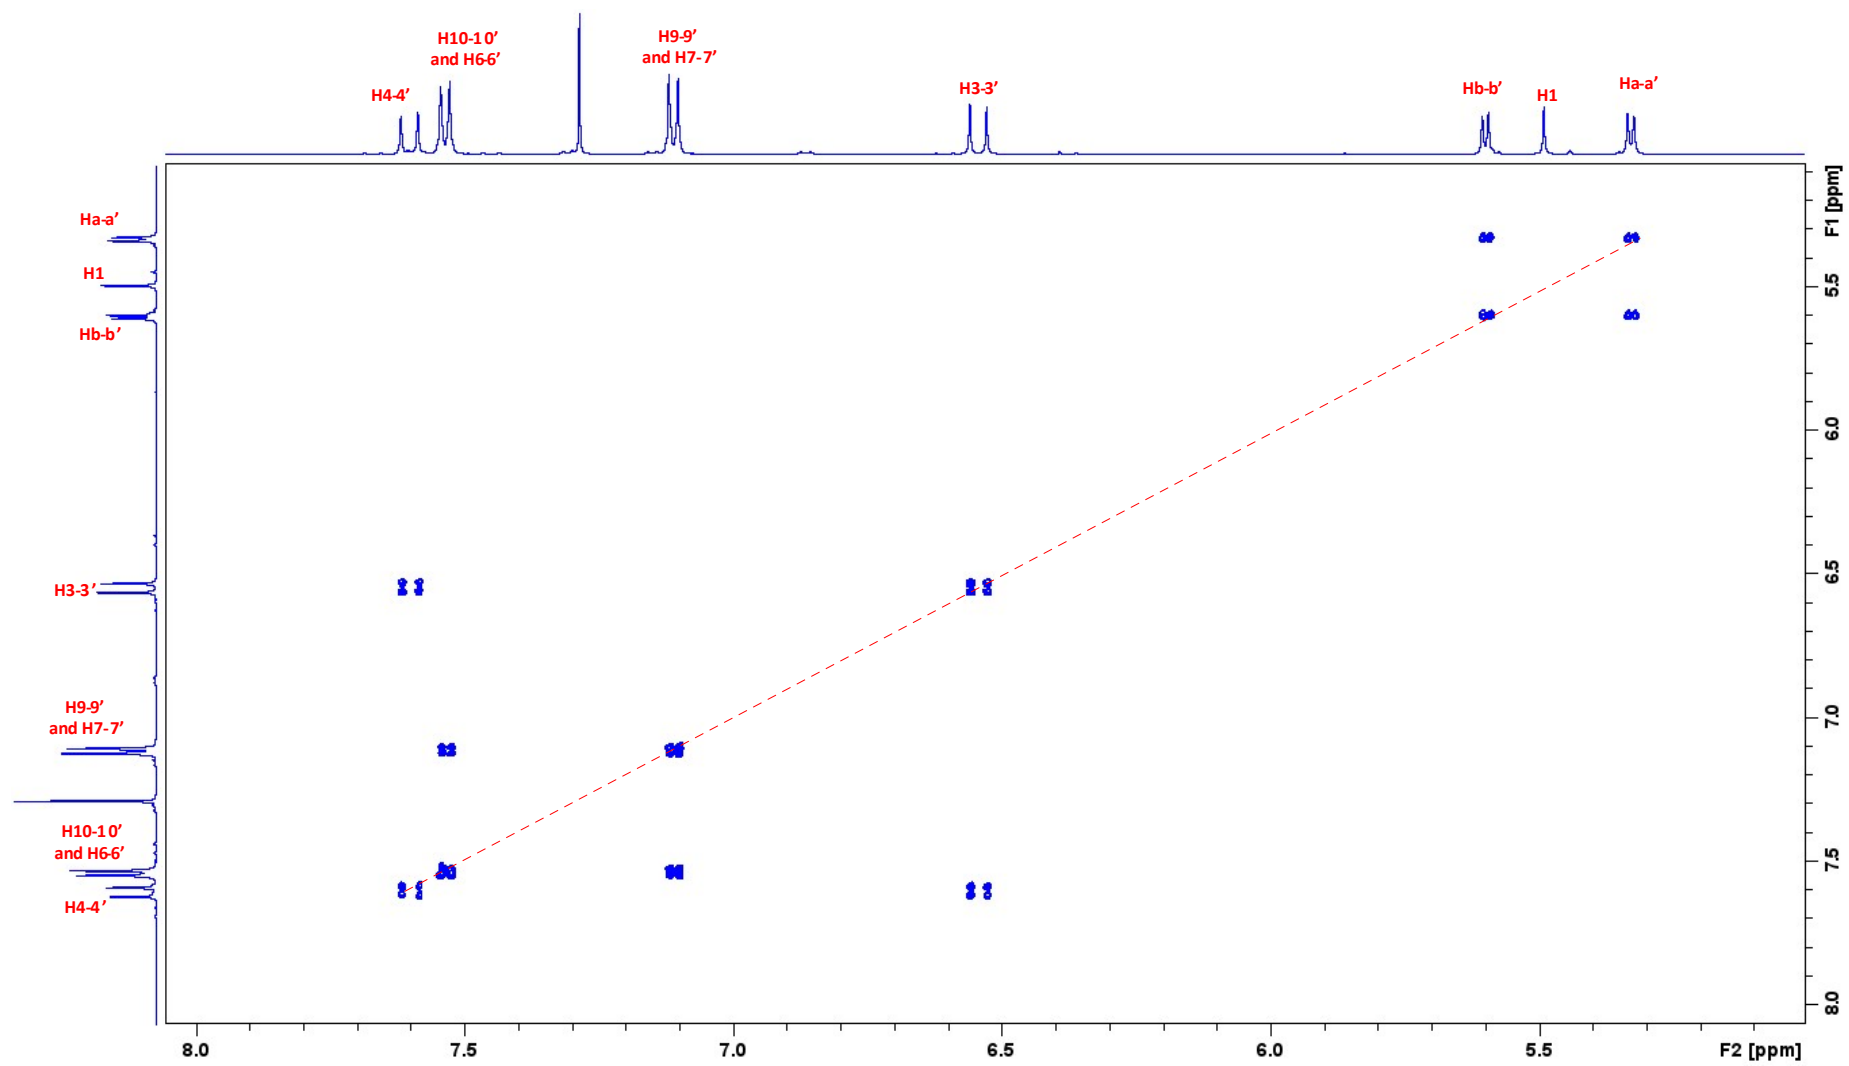

**Figure S10 (b).** Magnification of  $\{^1\text{H}-^1\text{H}\}$ -COSY NMR



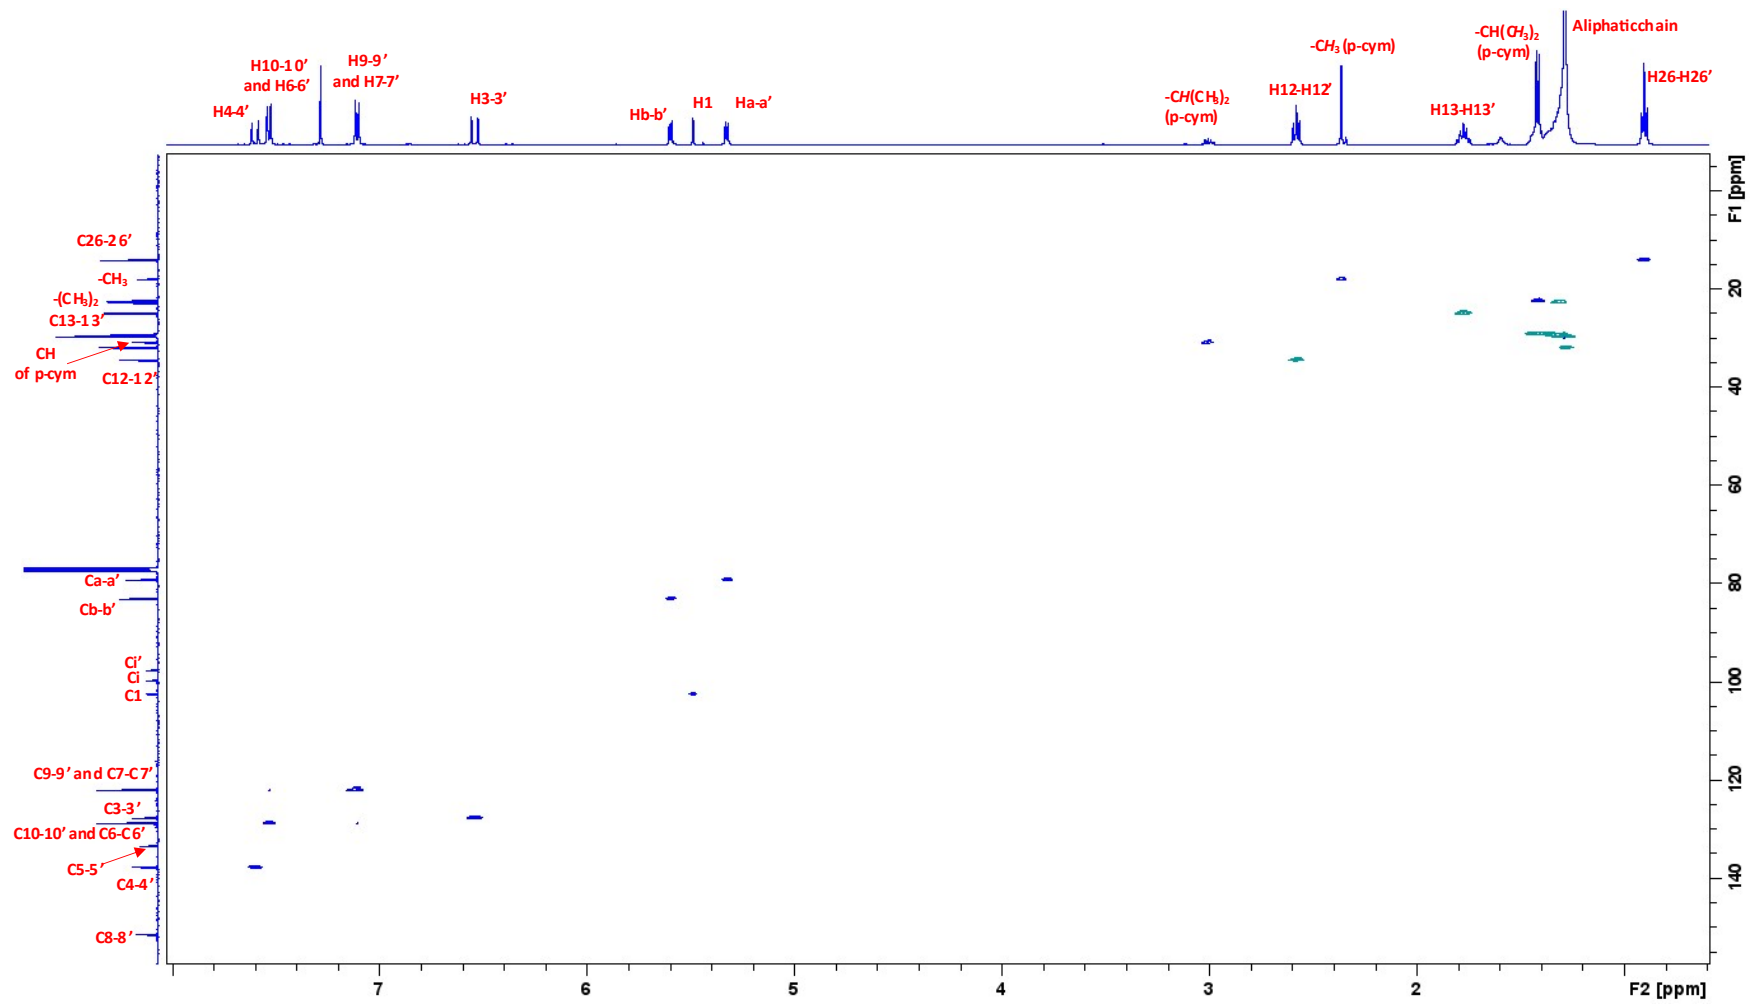

**Figure S11.**  $\{^1\text{H}-^{13}\text{C}\}$ -HSQC NMR of **2** in  $\text{CDCl}_3$  at 293 K

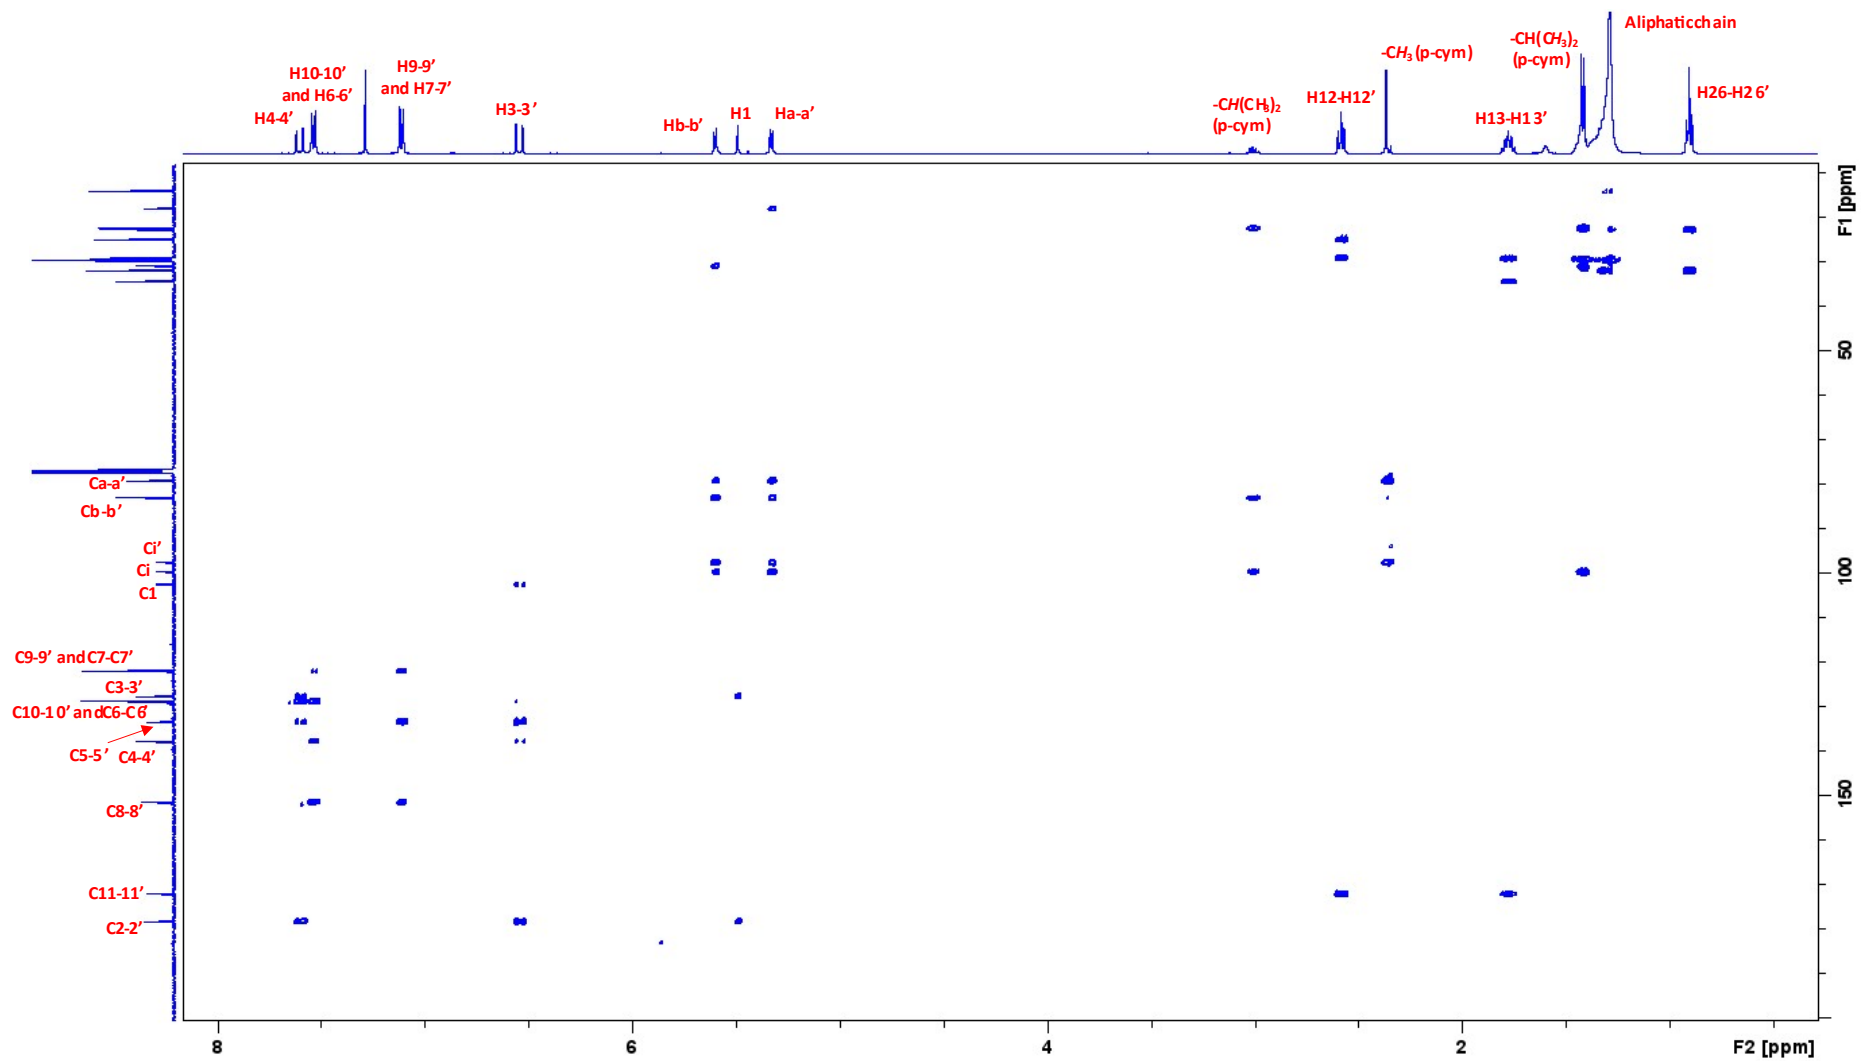

**Figure S12.**  $\{^1\text{H}$ - $^{13}\text{C}\}$ -HMBC NMR of **2** in  $\text{CDCl}_3$  at 293 K

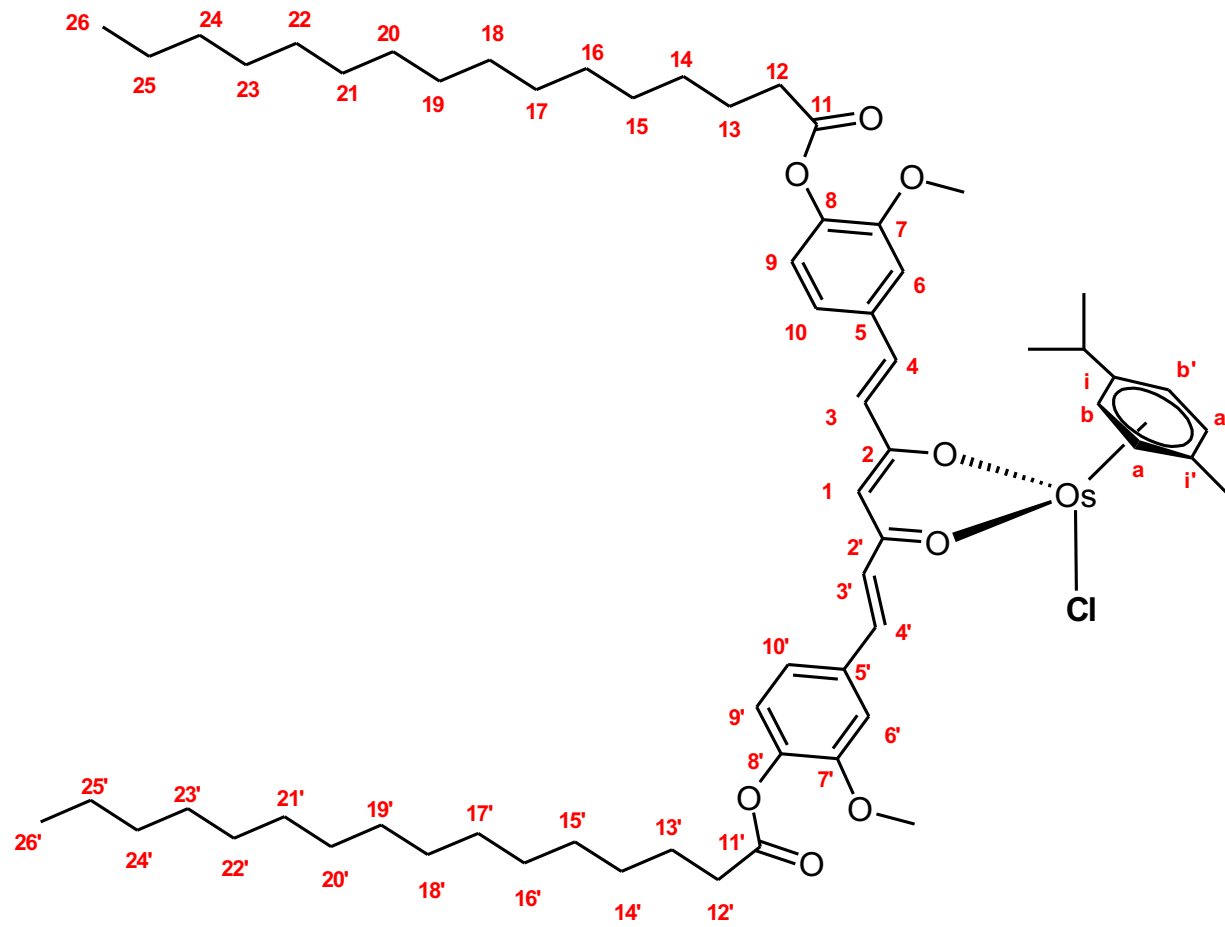

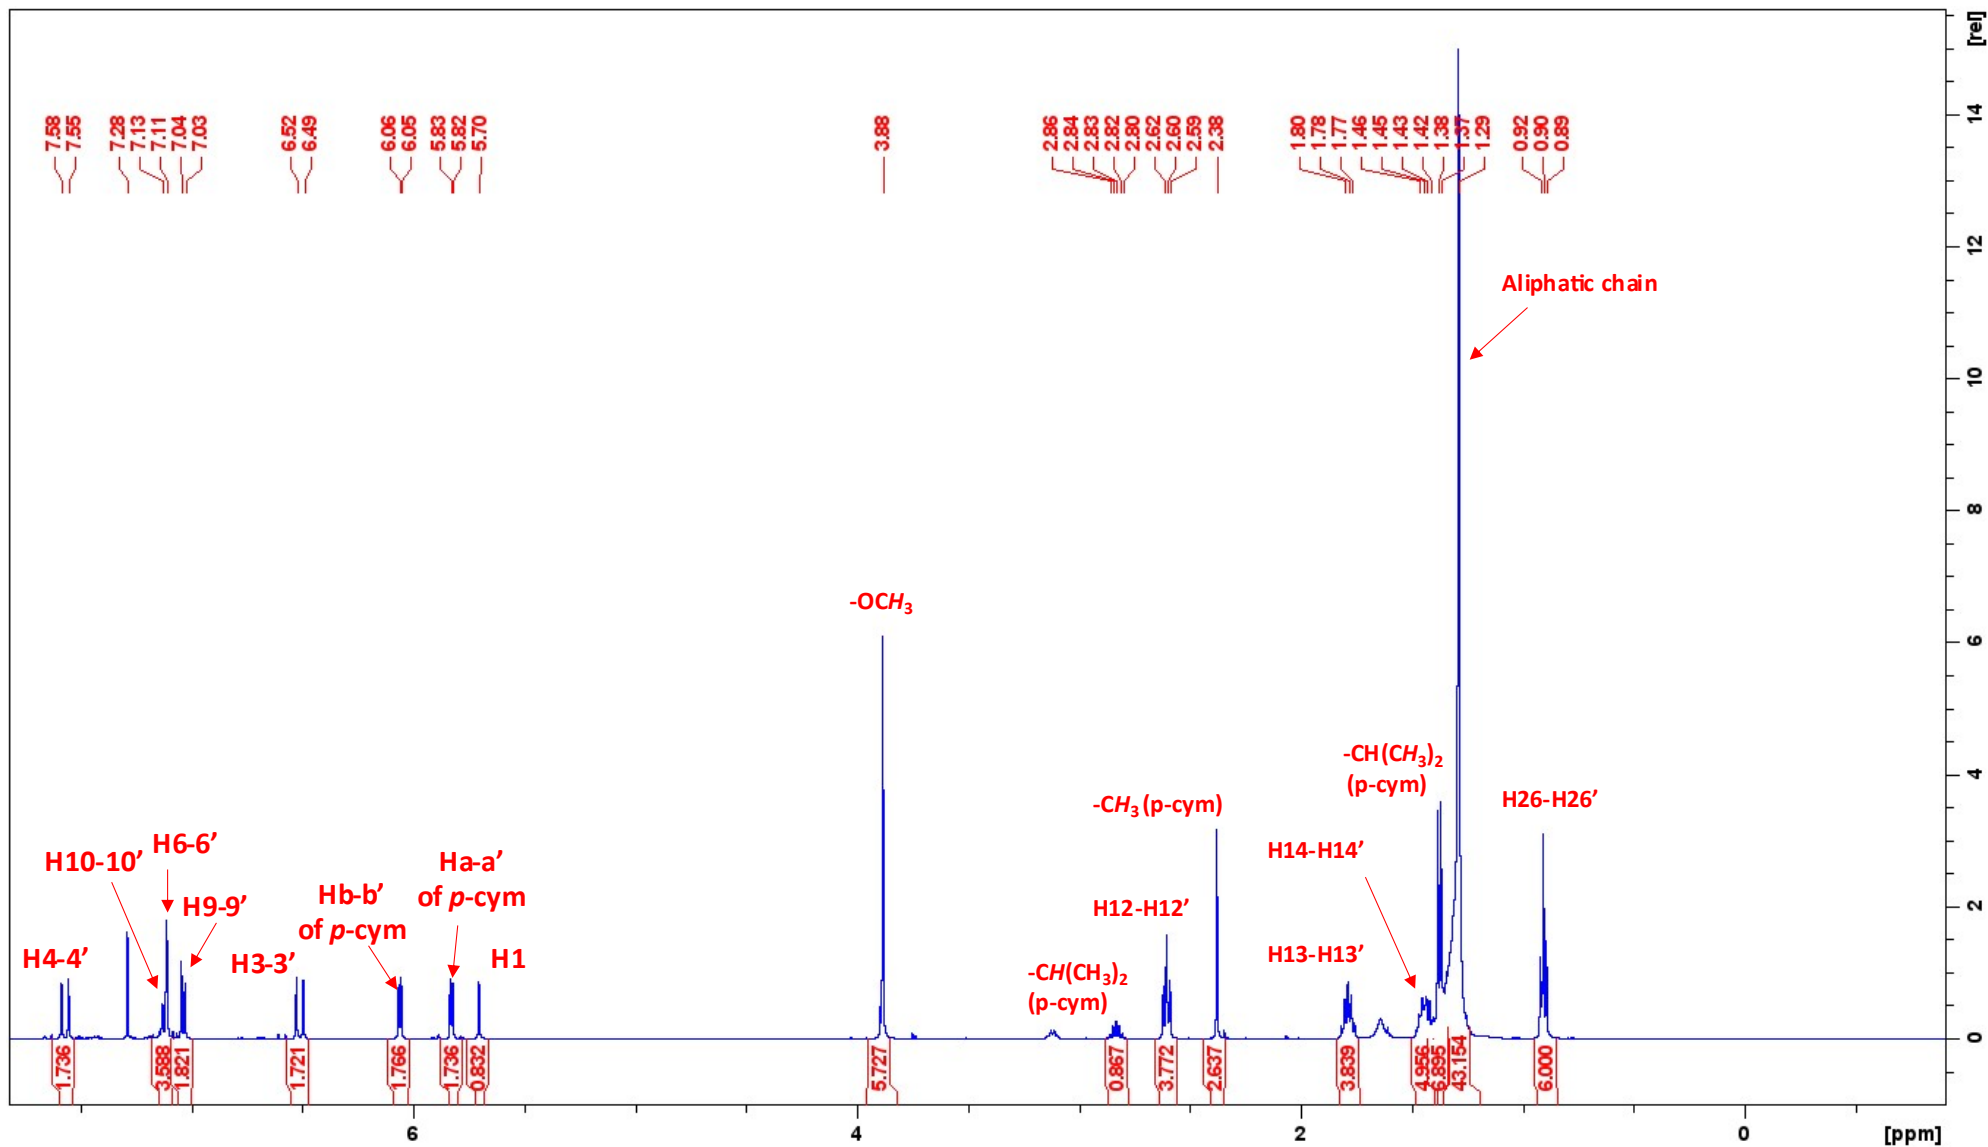

Figure S13.  $^1\text{H-NMR}$  of **3** in  $\text{CDCl}_3$  at 293 K

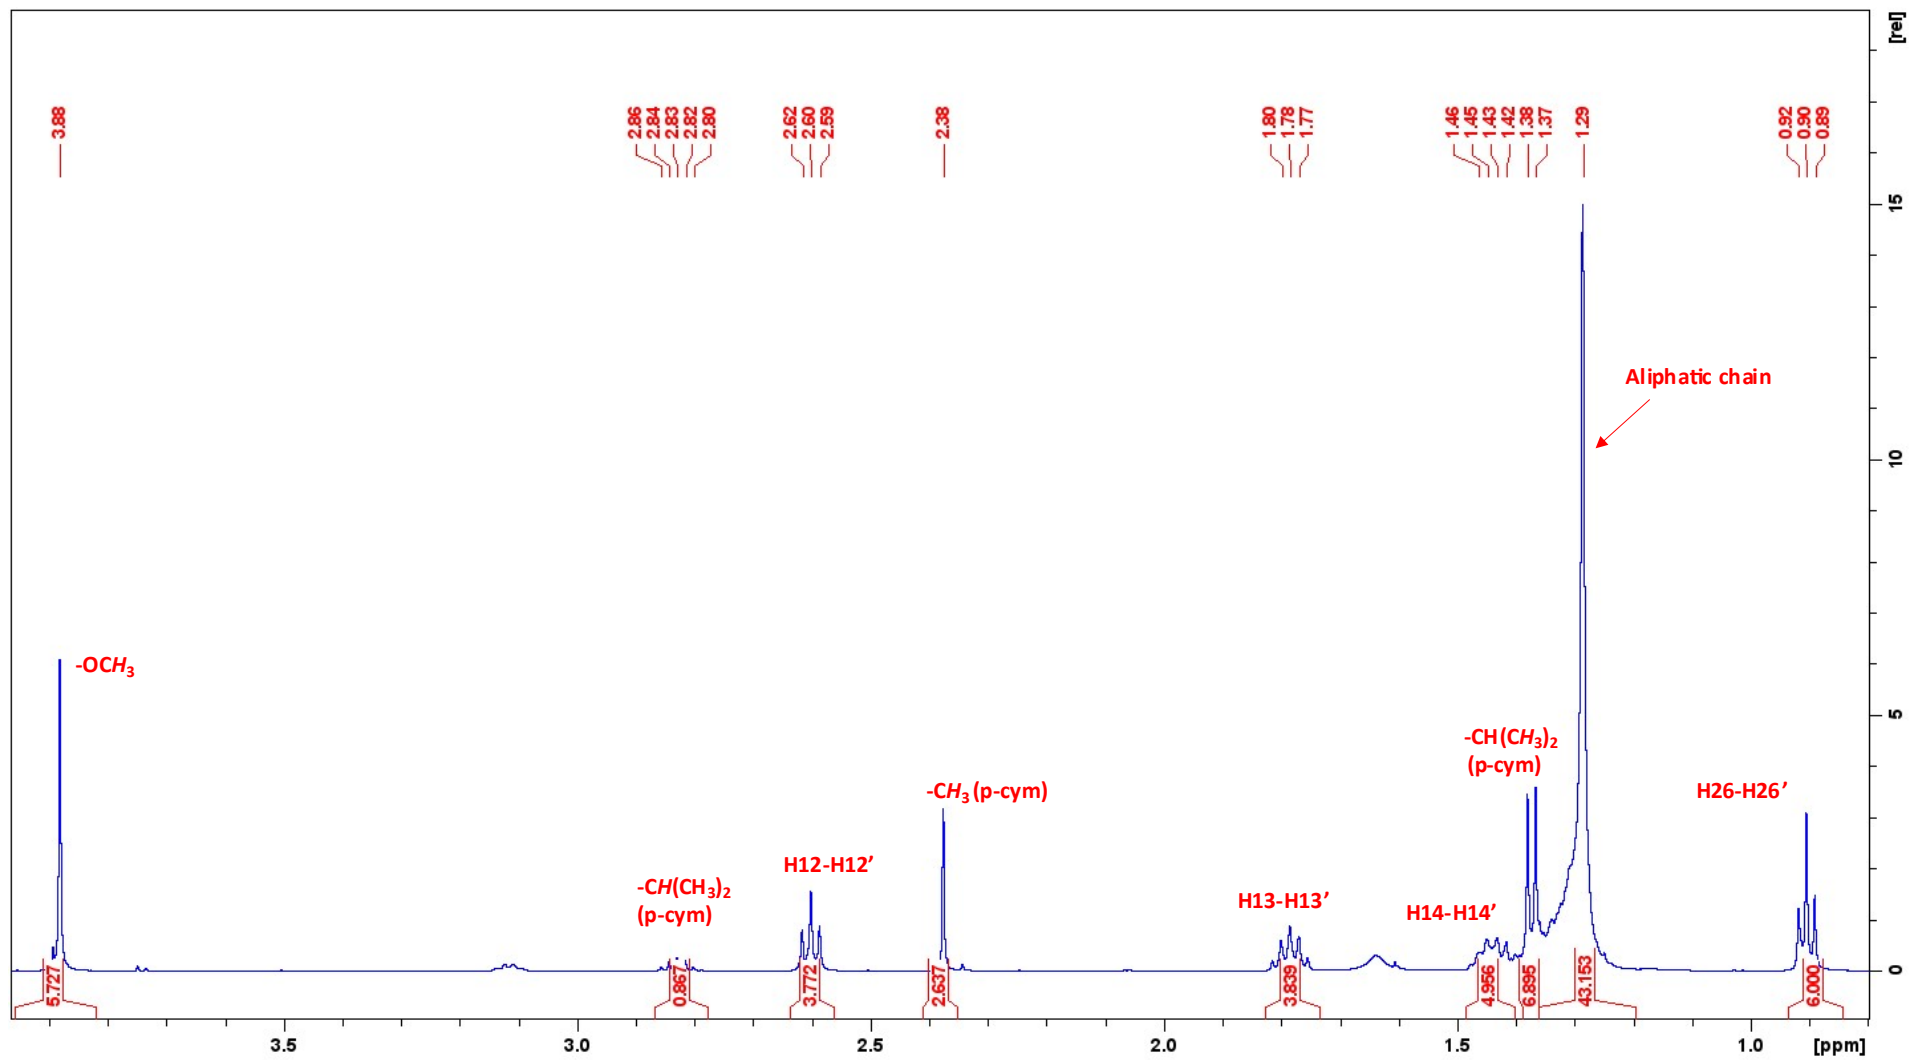

Figure S13 (a). Magnification of <sup>1</sup>H-NMR (1-4 ppm)

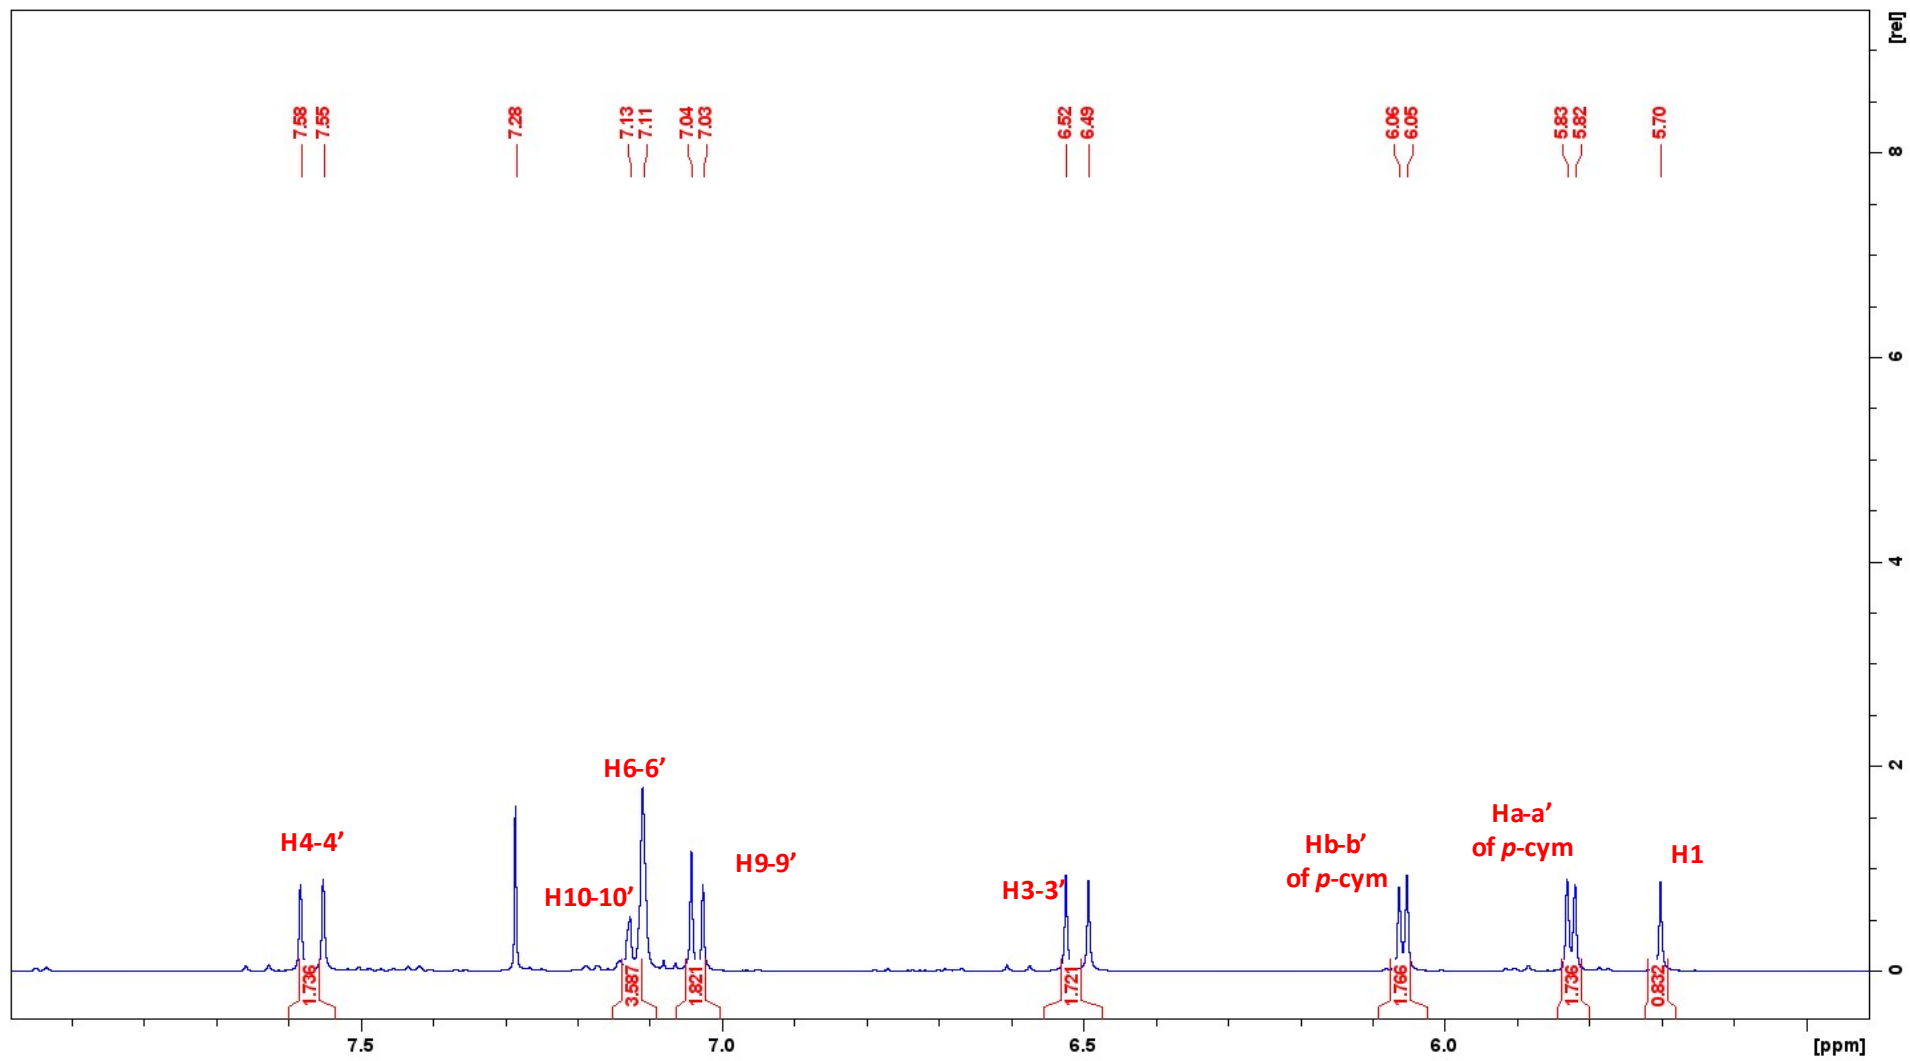

Figure S13 (b). Magnification of <sup>1</sup>H-NMR (1-8 ppm)

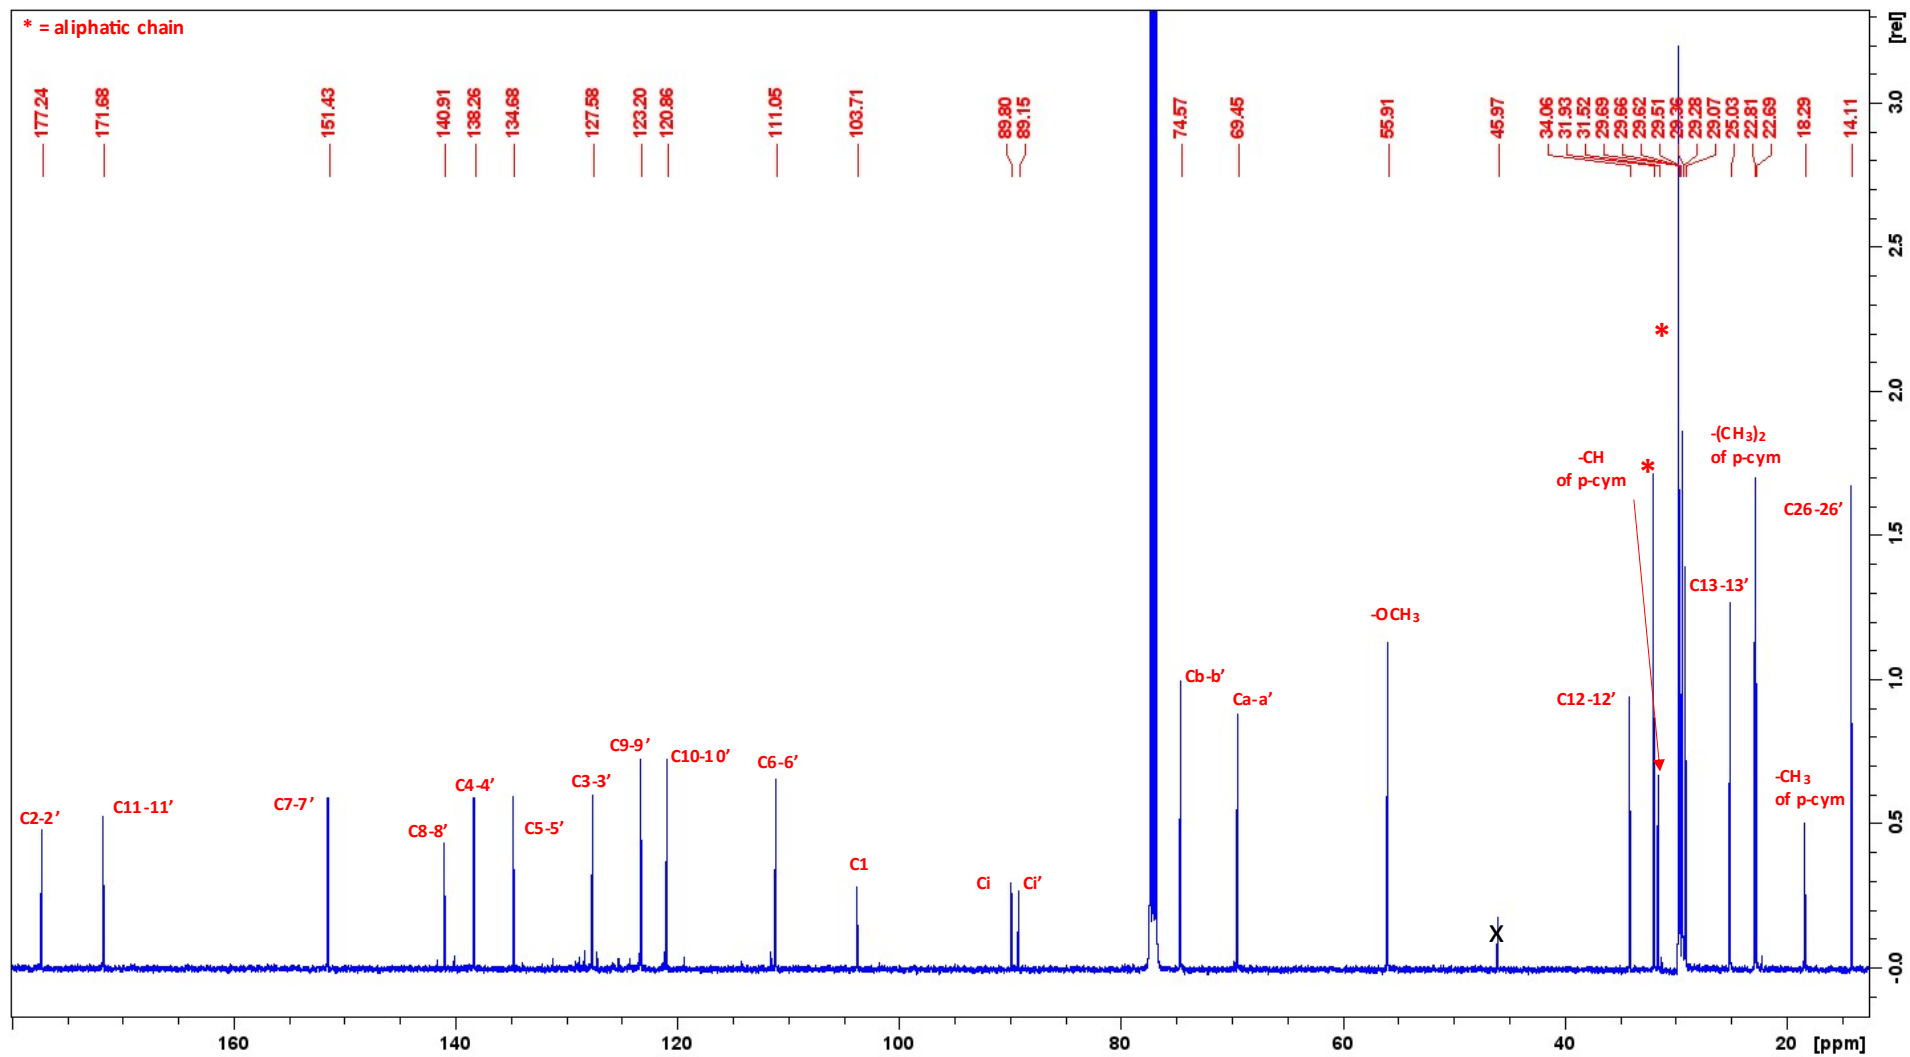

Figure S14. <sup>13</sup>C-NMR of **3** in CDCl<sub>3</sub> at 293 K

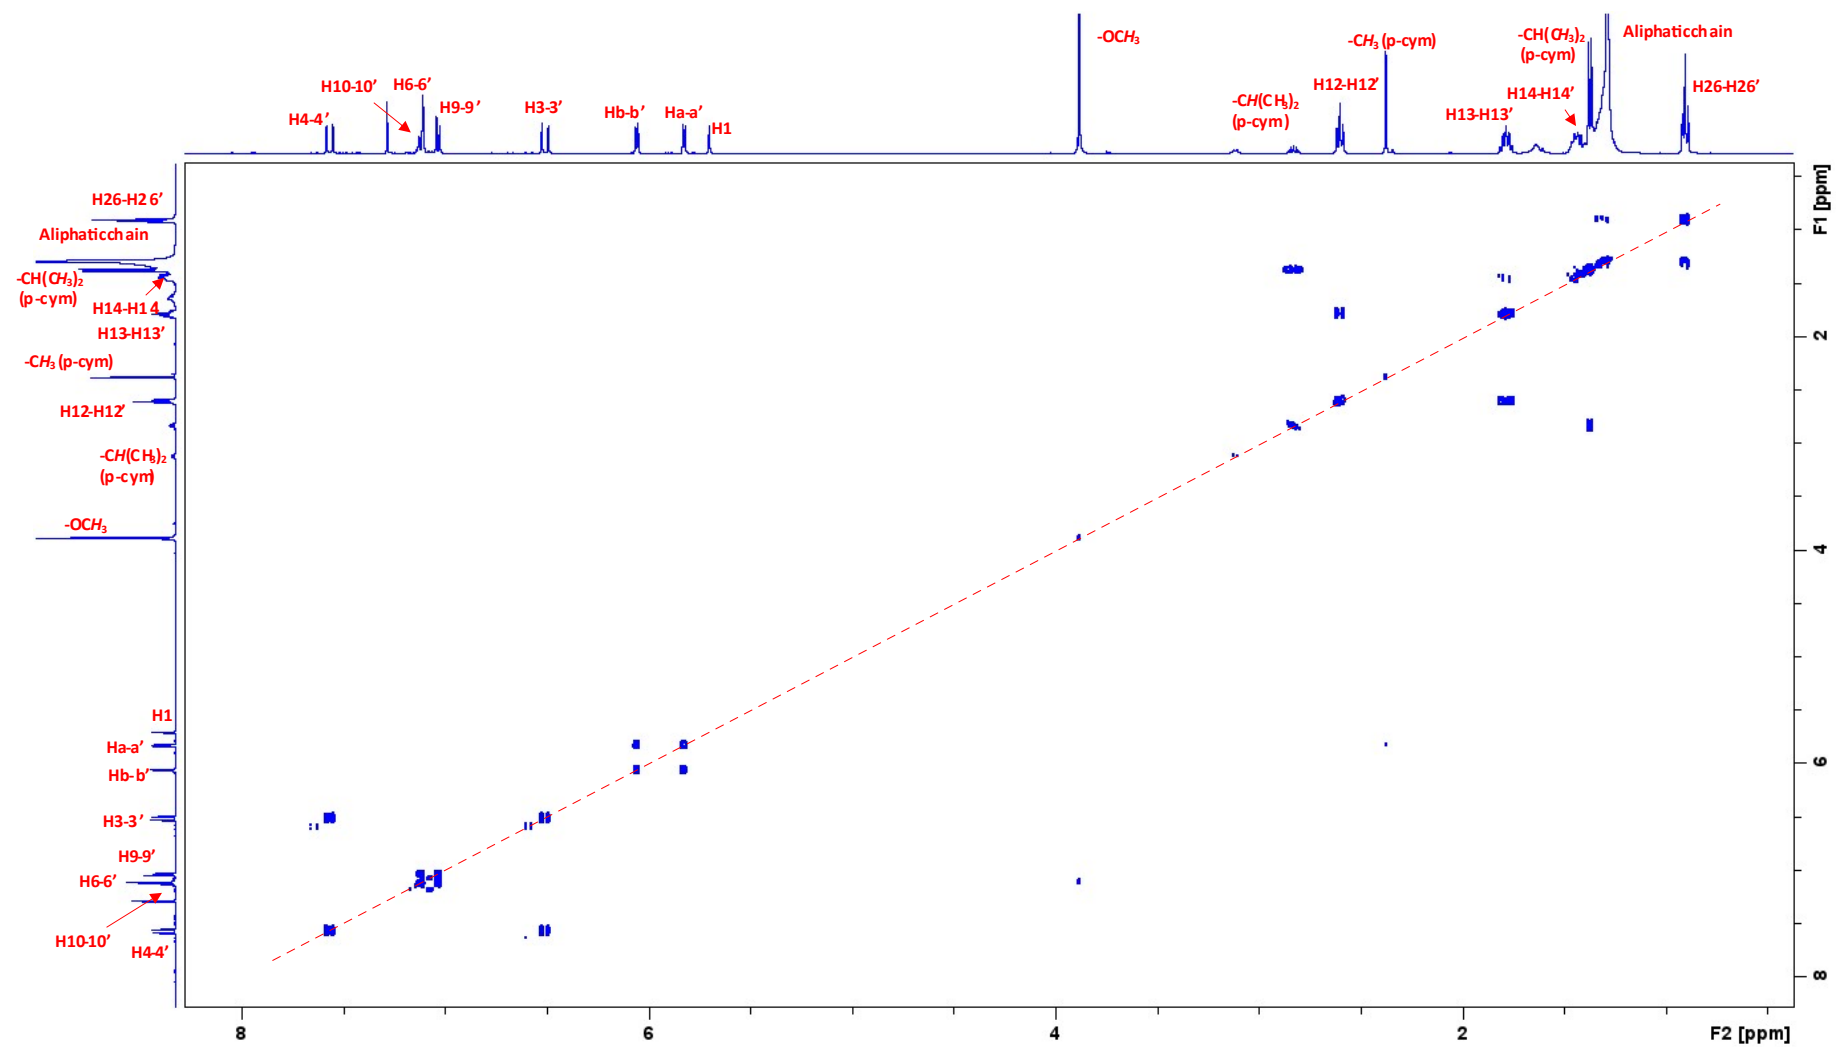

**Figure S15.**  $\{^1\text{H}-^1\text{H}\}$ -COSY NMR of **3** in  $\text{CDCl}_3$  at 293 K



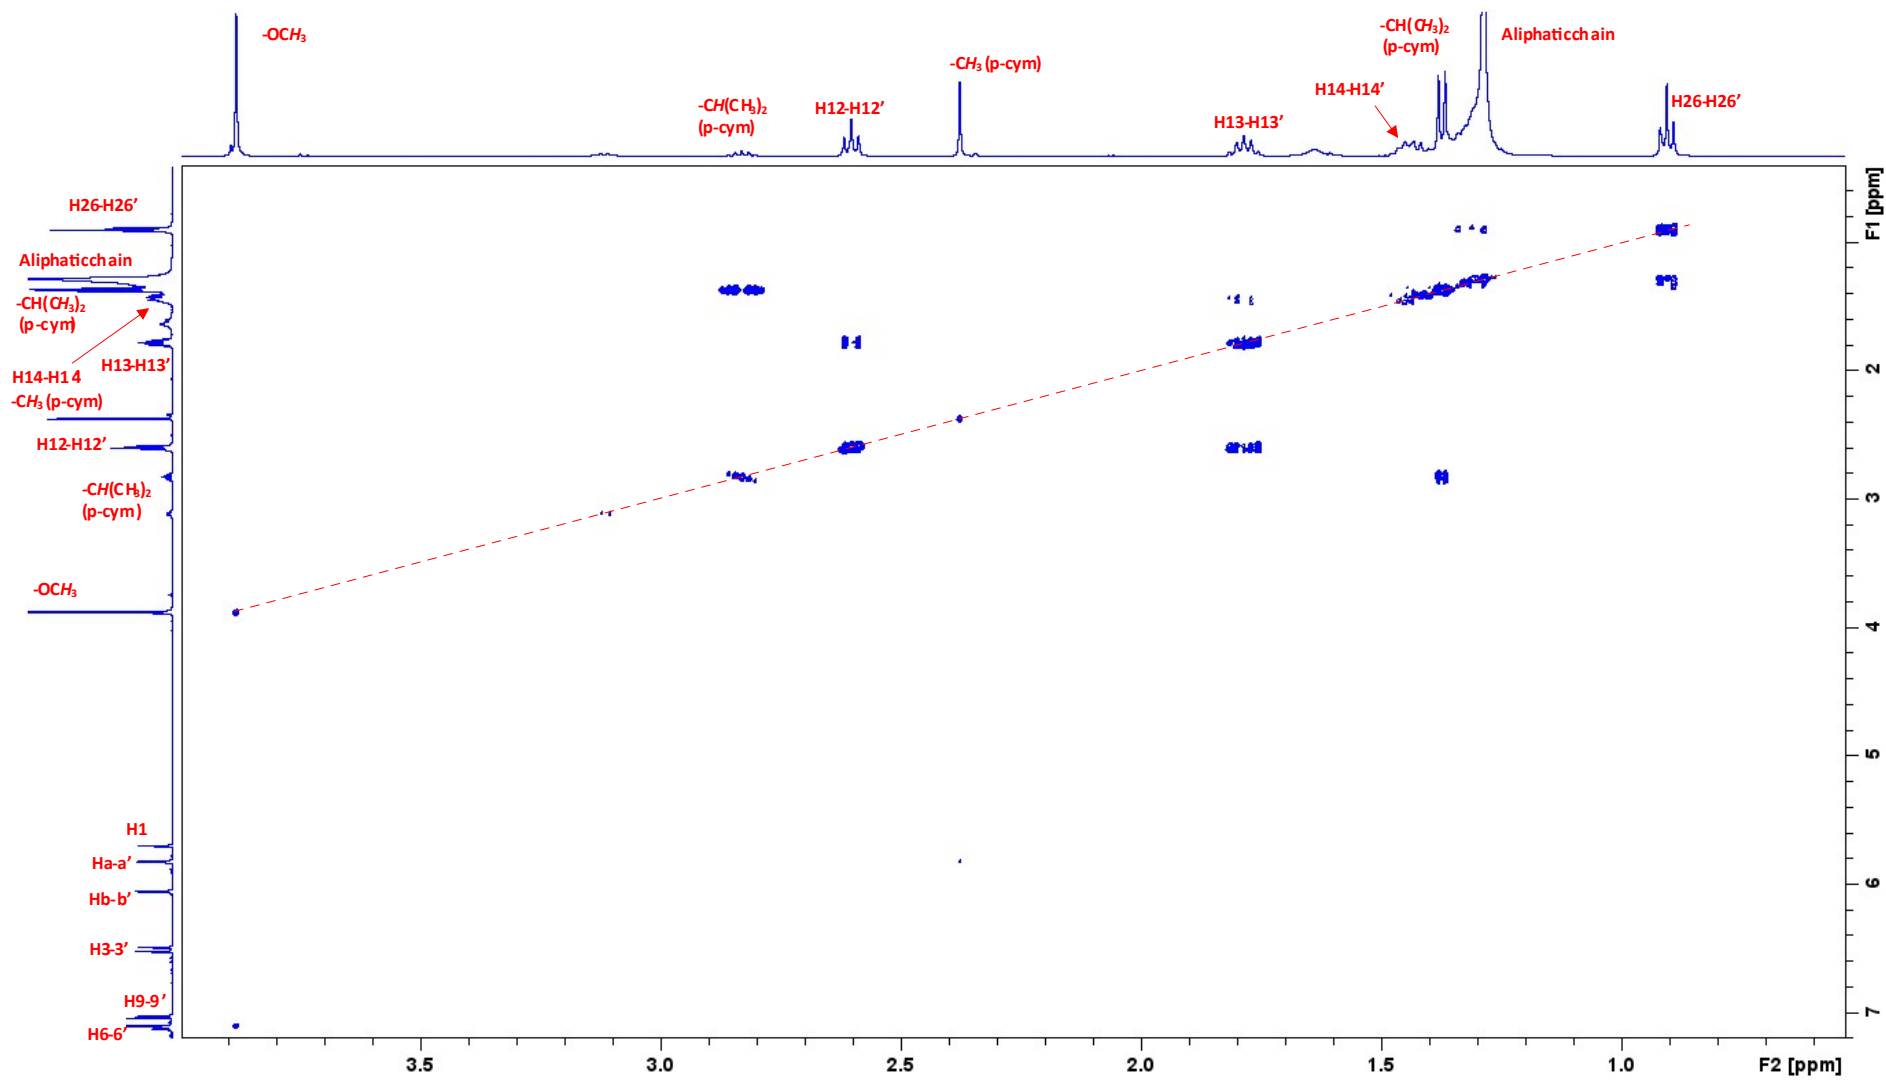

Figure S15 (a). Magnification of  $\{^1\text{H}-^1\text{H}\}$ -COSY NMR

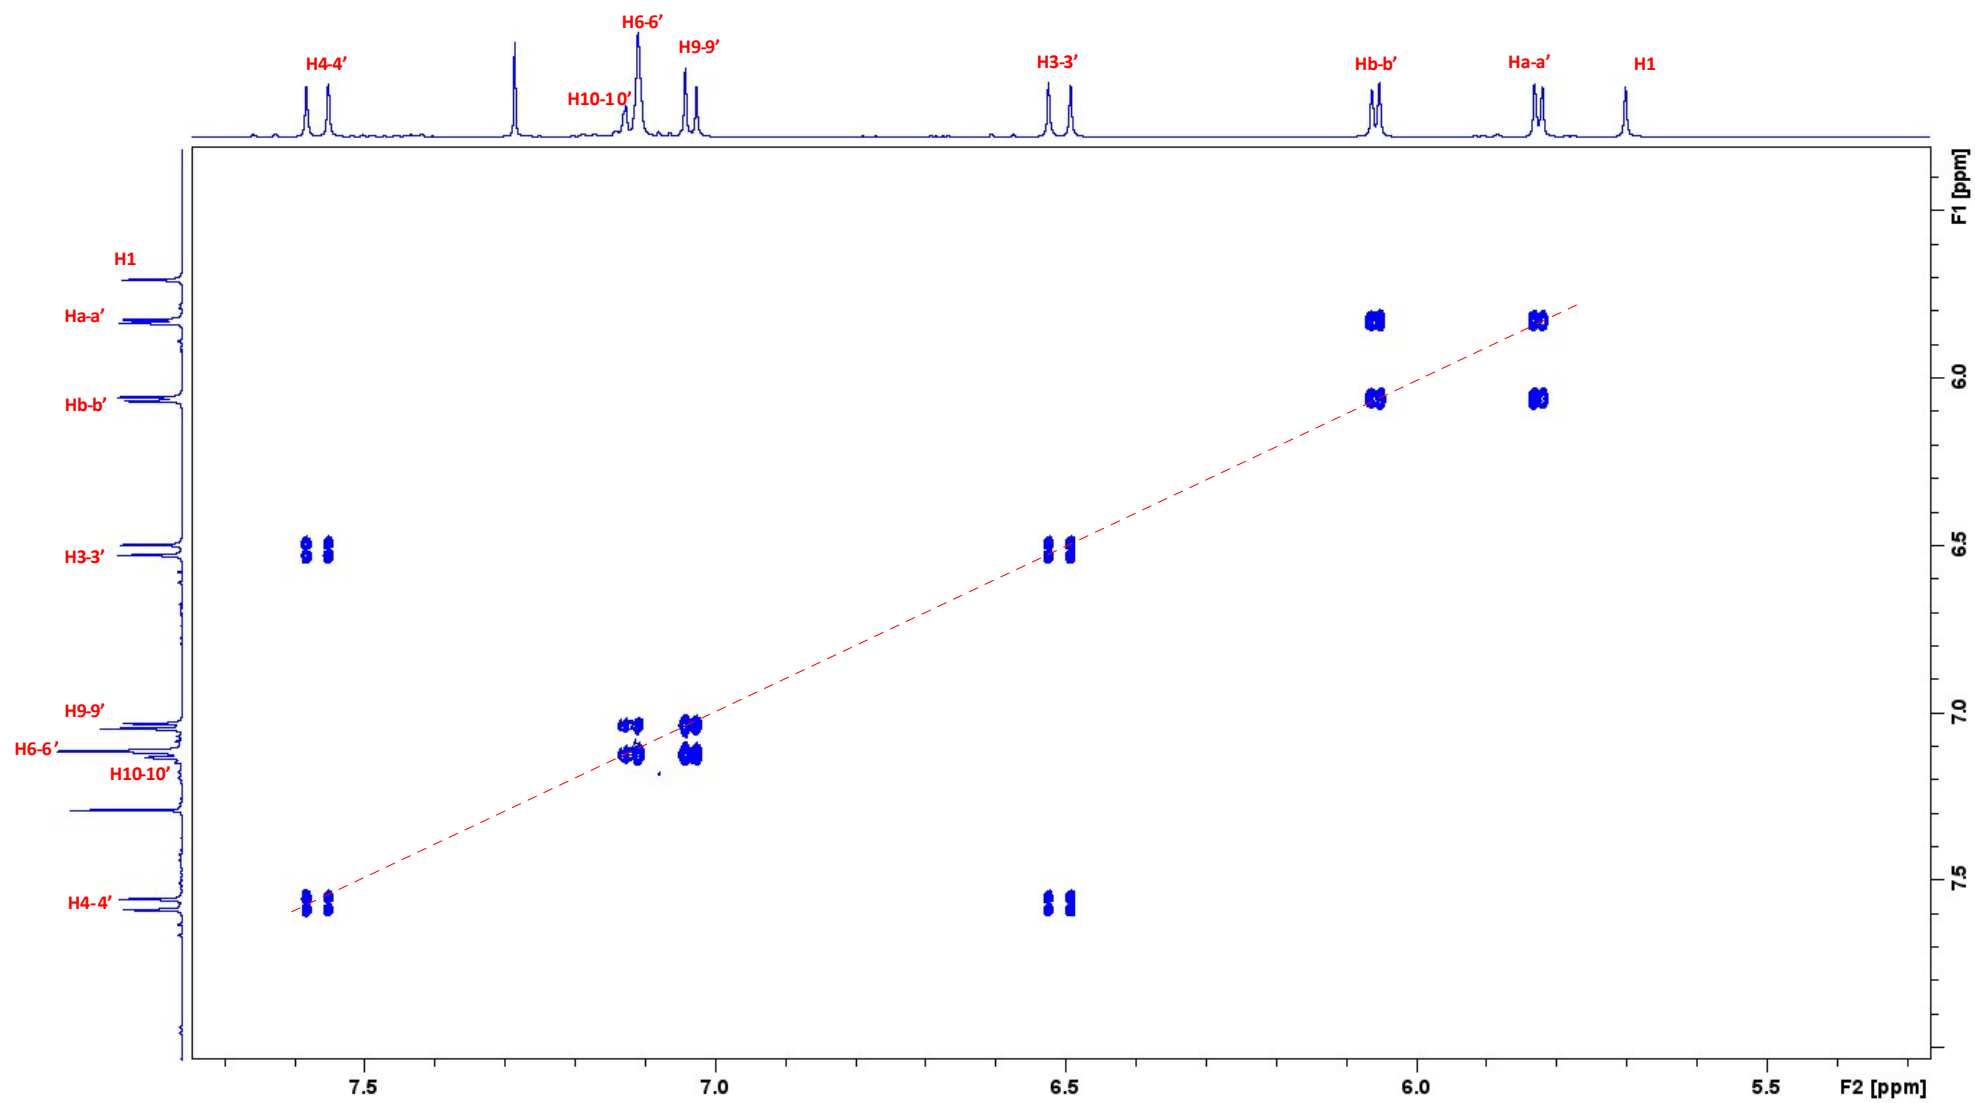

**Figure S15 (b).** Magnification of  $\{^1\text{H}-^1\text{H}\}$ -COSY NMR

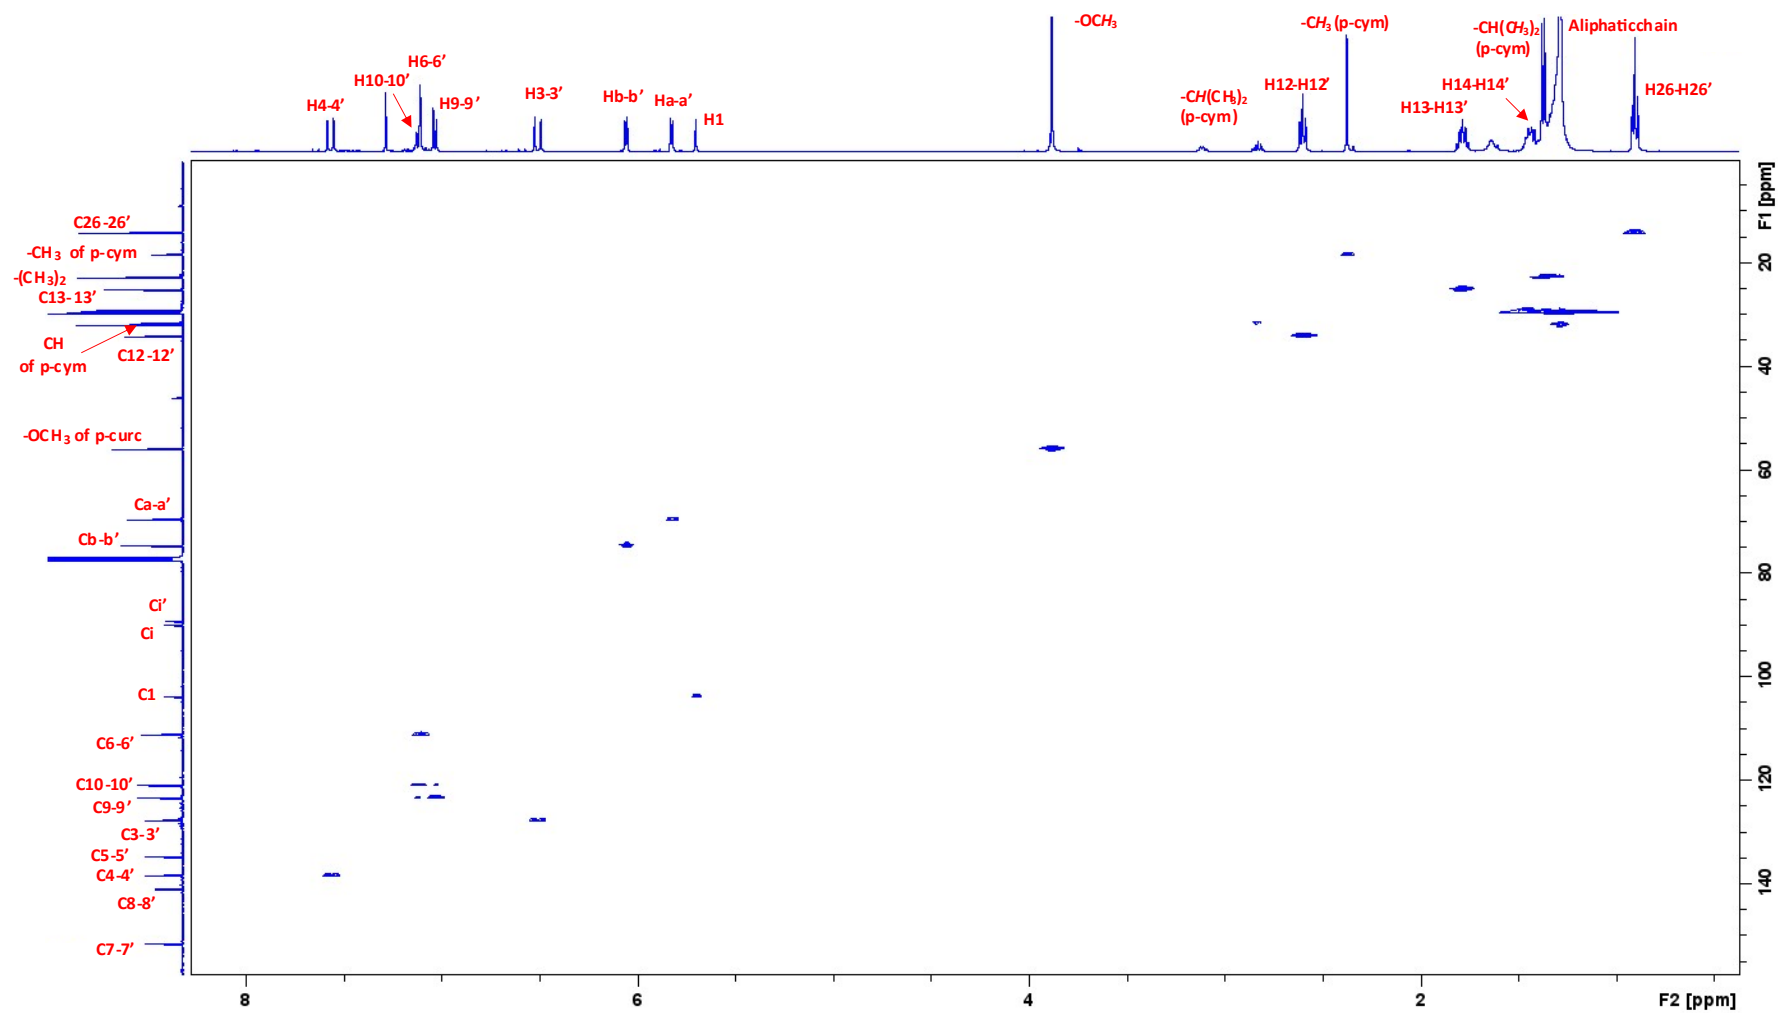

**Figure S16.**  $\{^1\text{H}-^{13}\text{C}\}$ -HSQC NMR of **3** in  $\text{CDCl}_3$  at 293 K

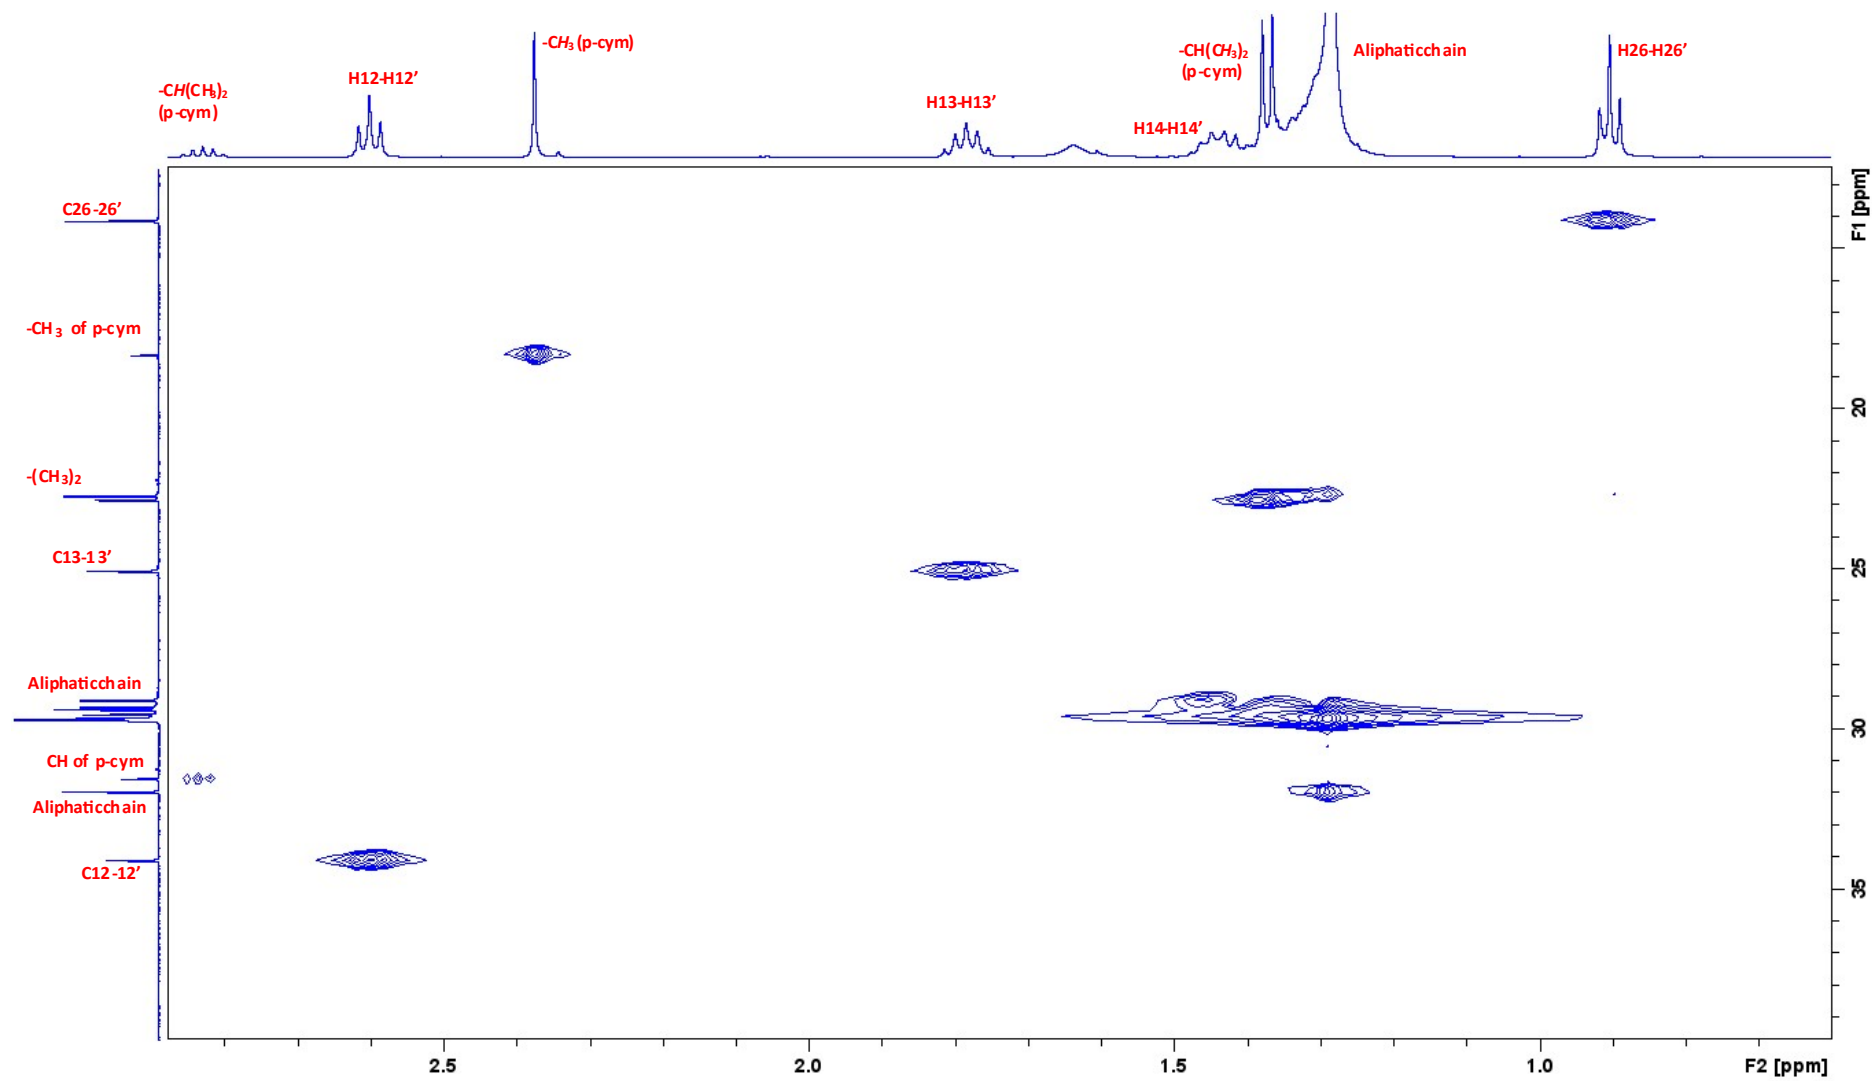

Figure S16 (a). Magnification of  $\{^1\text{H}-^{13}\text{C}\}$ -HSQC NMR

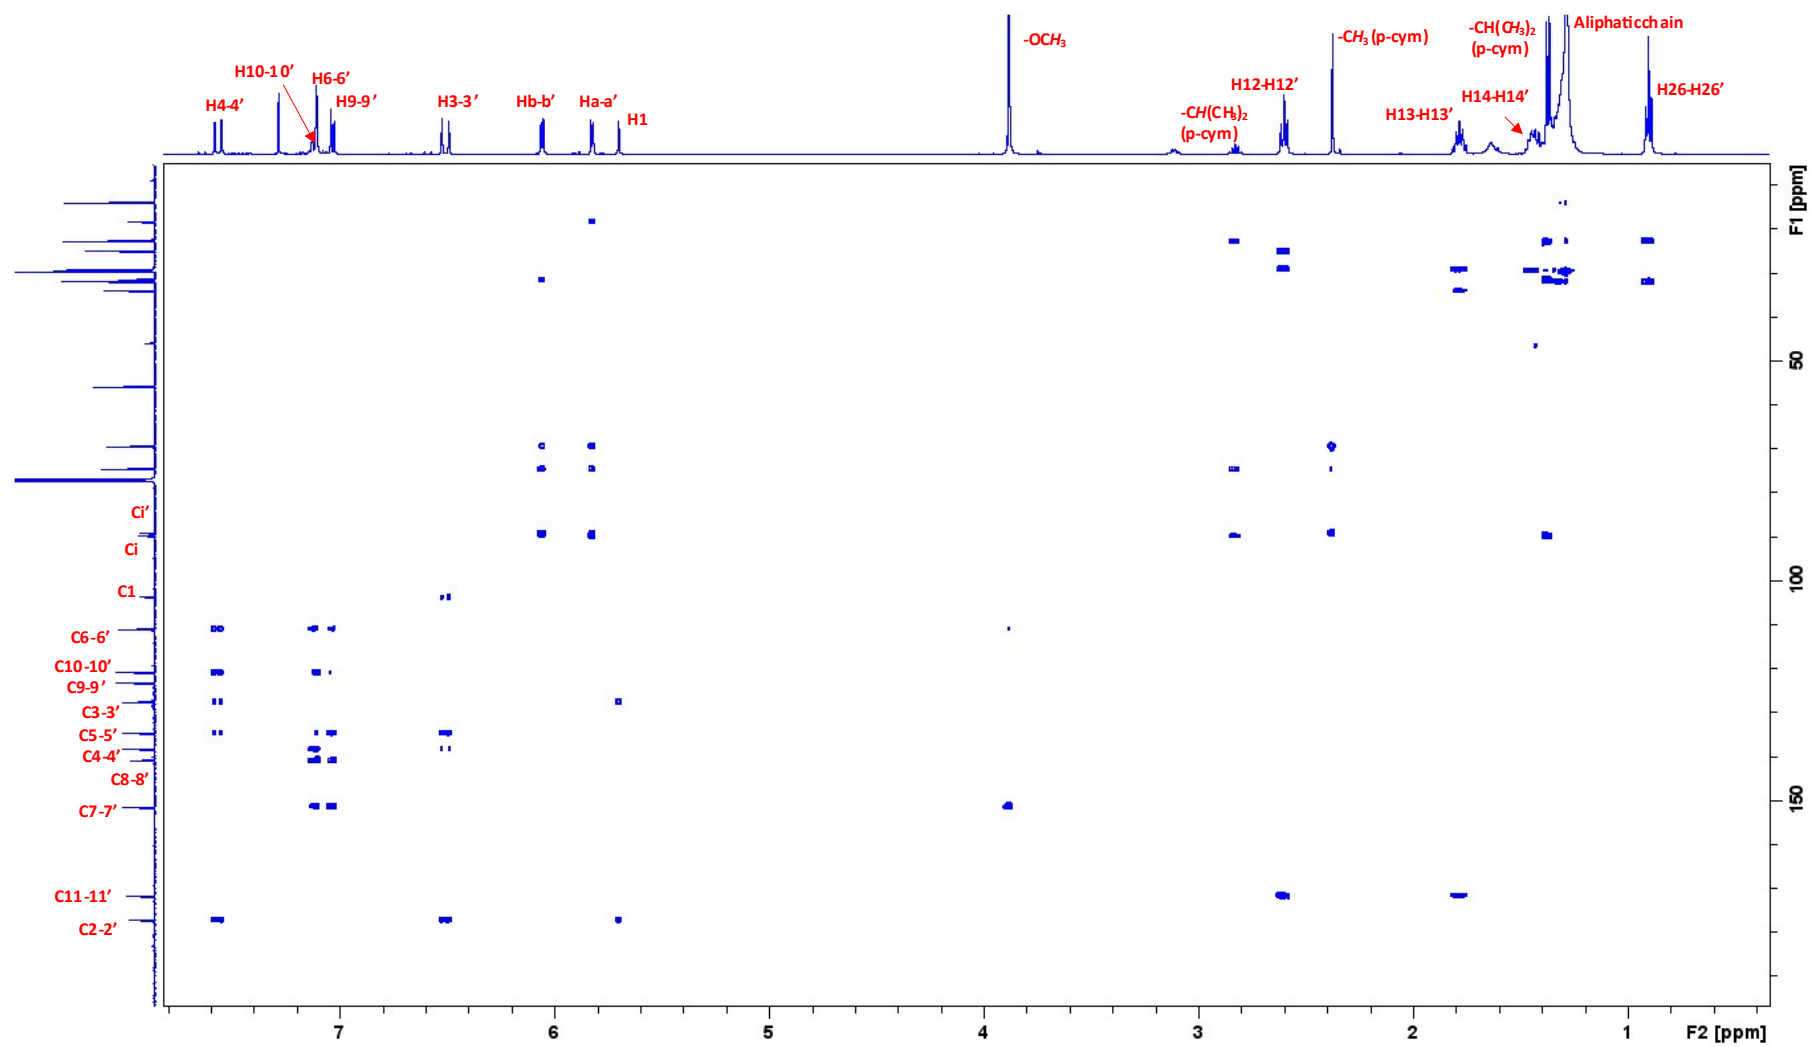

**Figure S17.**  $\{^1\text{H}-^{13}\text{C}\}$ -HMBC NMR of 3 in  $\text{CDCl}_3$  at 293 K

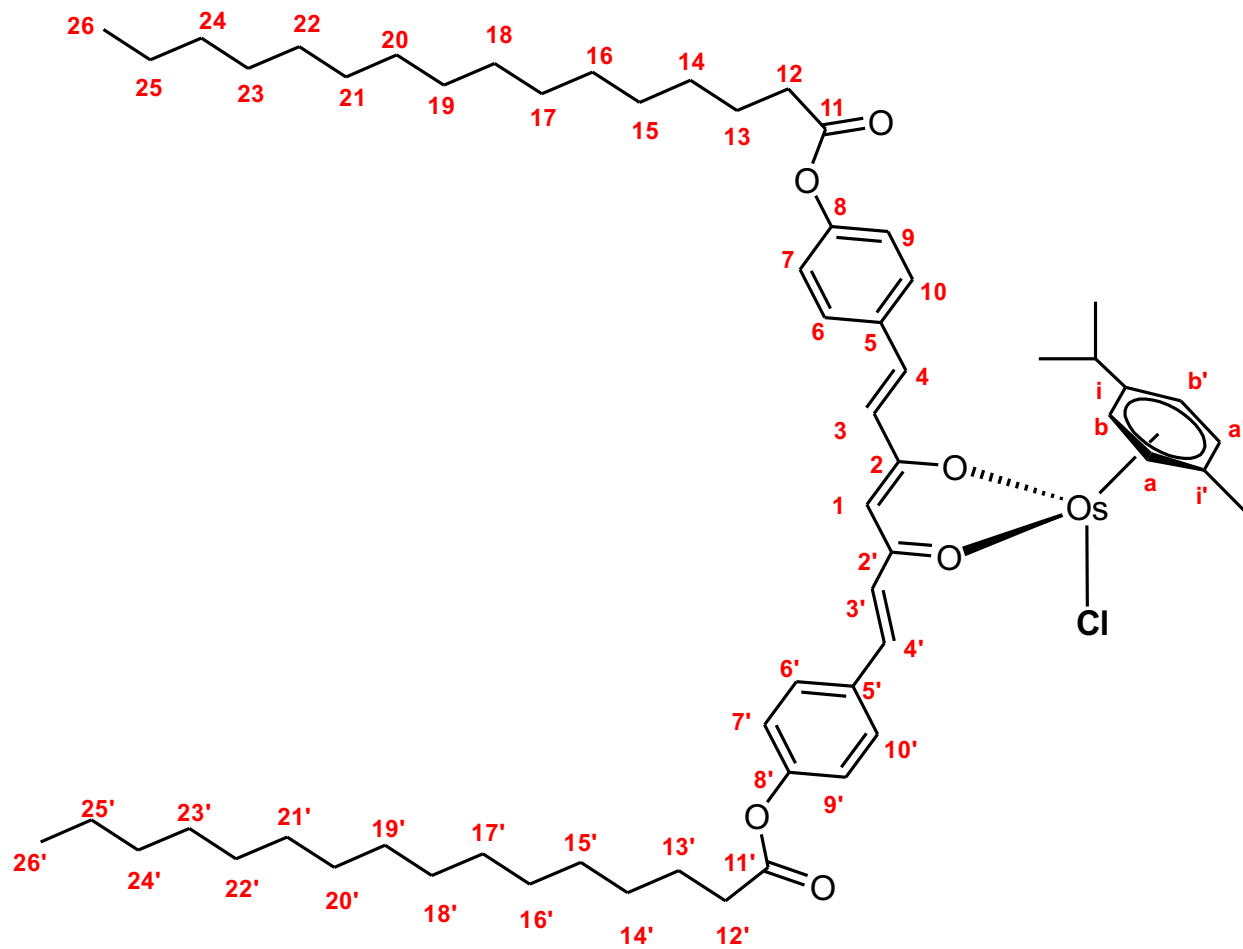

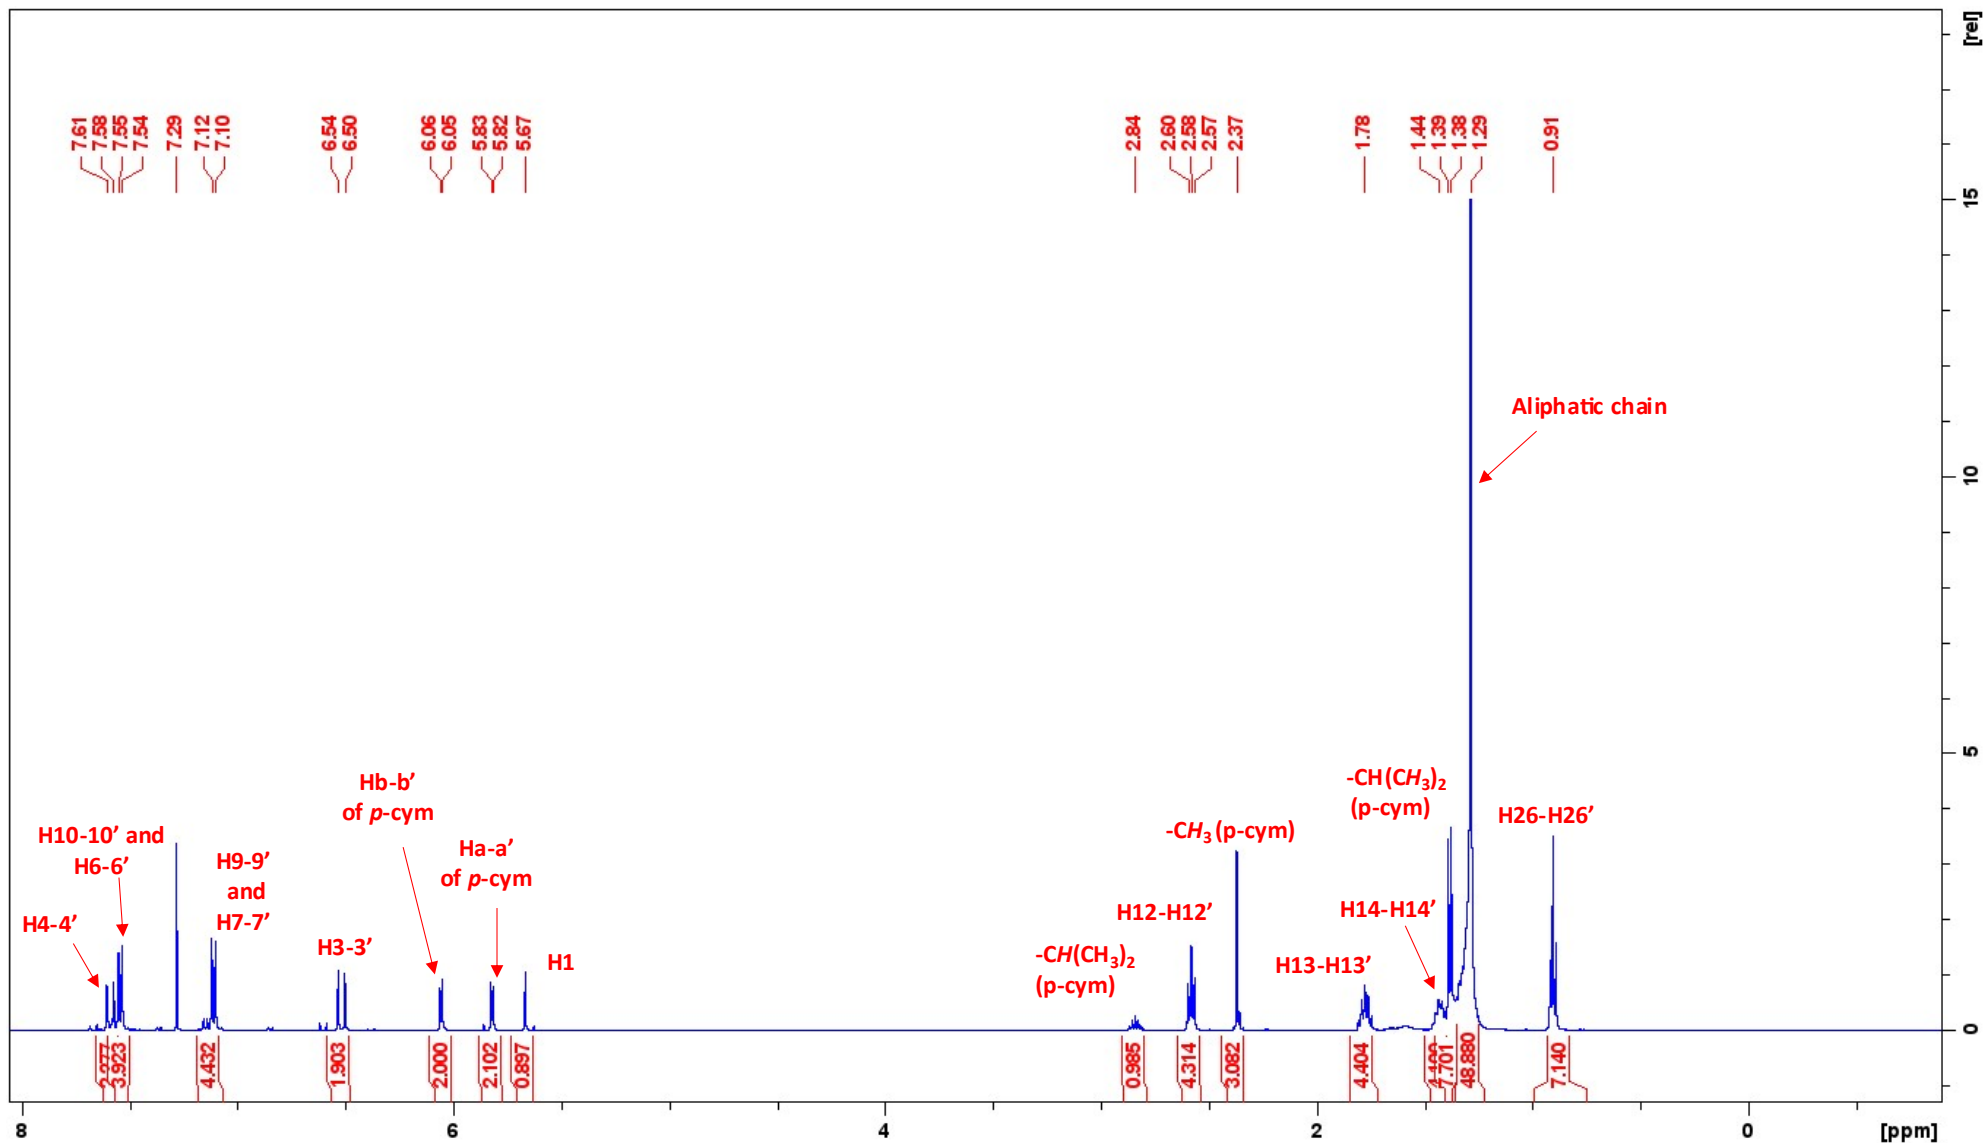

Figure S18. <sup>1</sup>H-NMR of **4** in CDCl<sub>3</sub> at 298 K

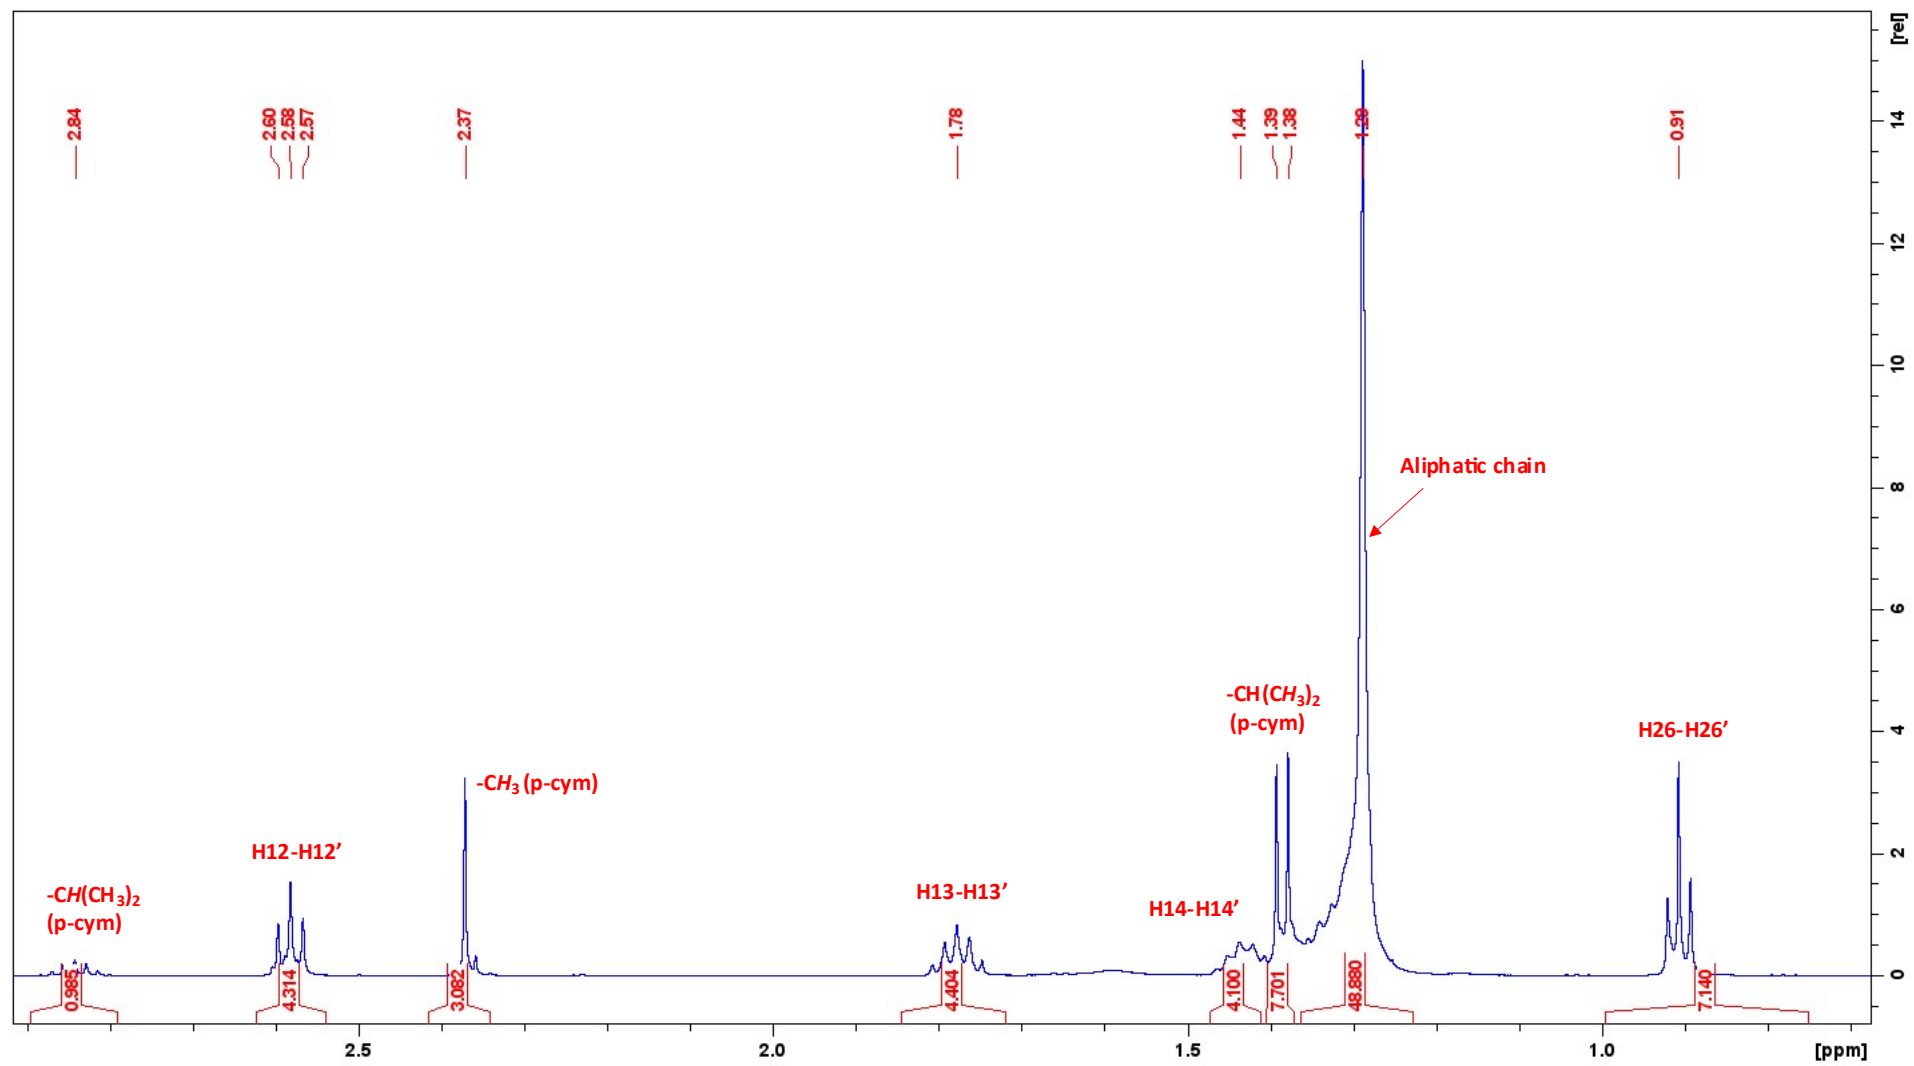

Figure S18 (a). Magnification of  $^1\text{H-NMR}$  (1-3 ppm)



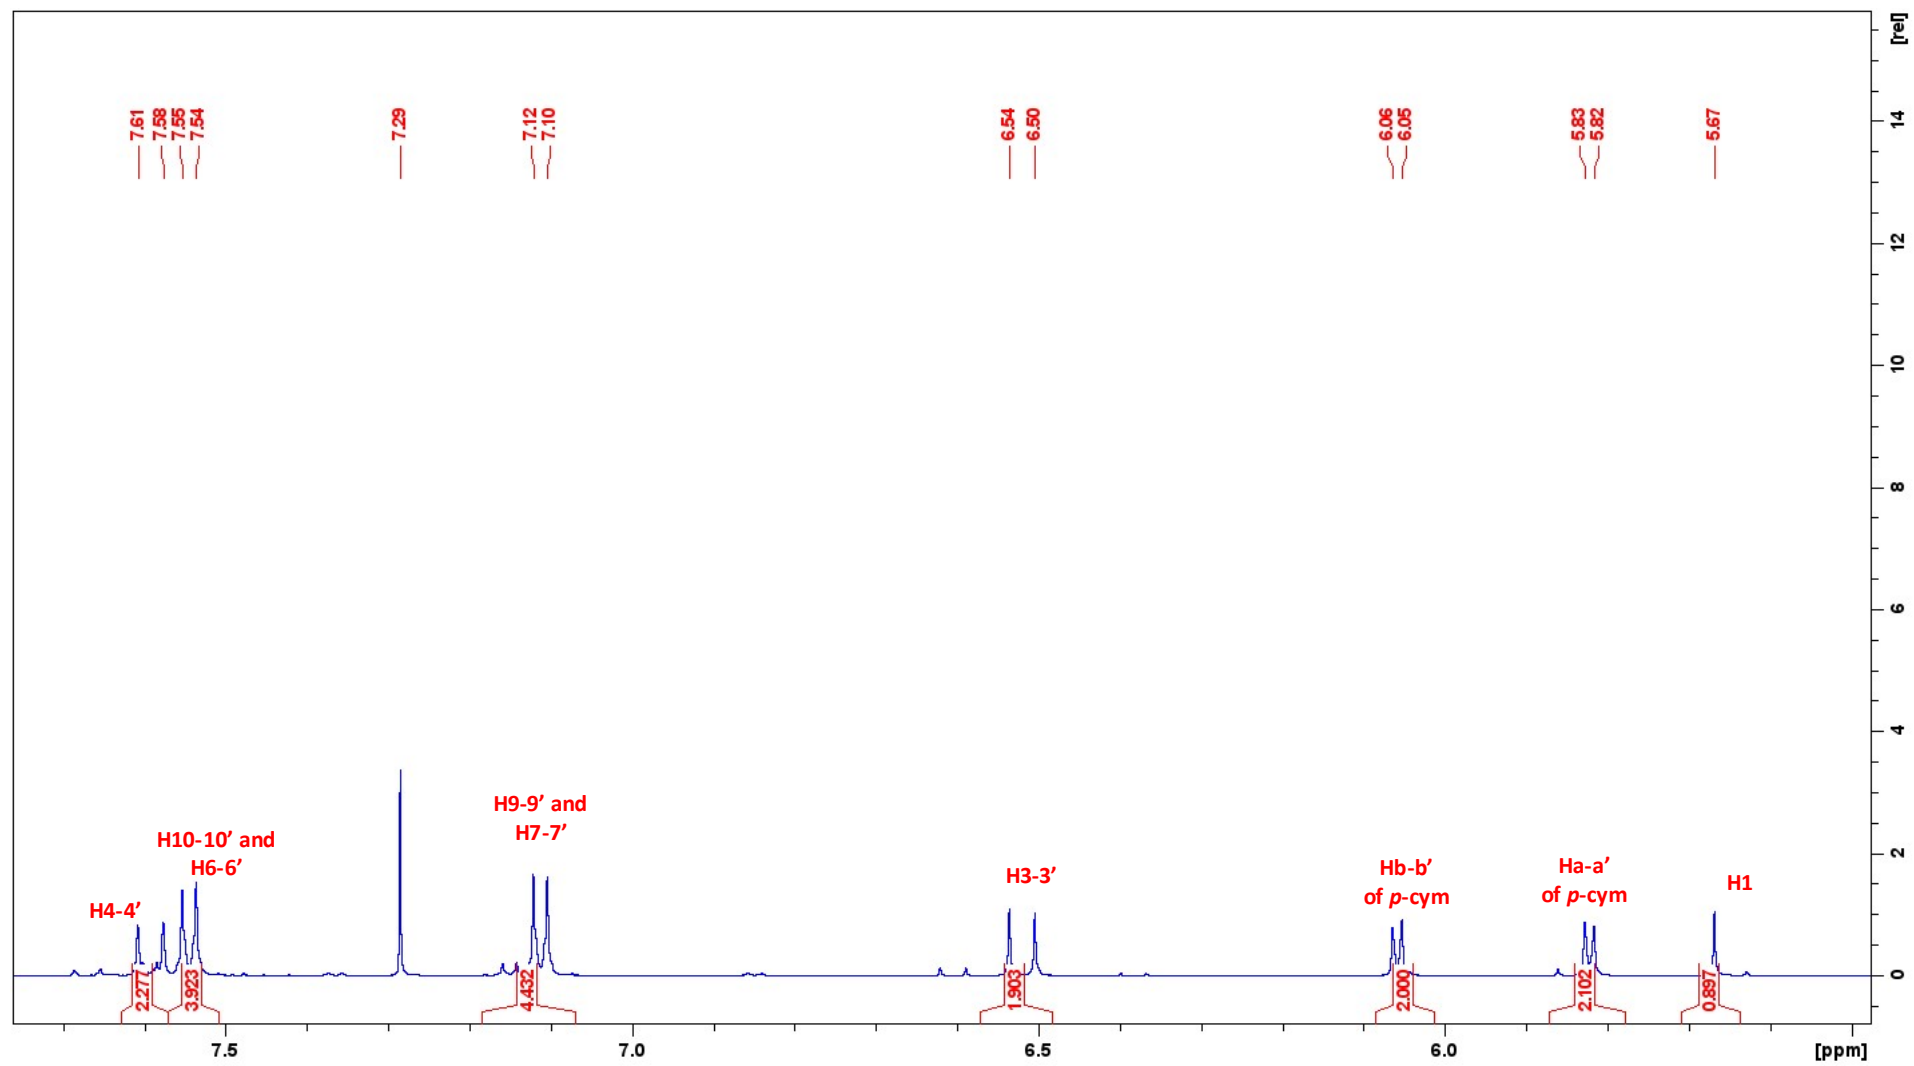

Figure S18 (b). Magnification of <sup>1</sup>H-NMR (4-8 ppm)

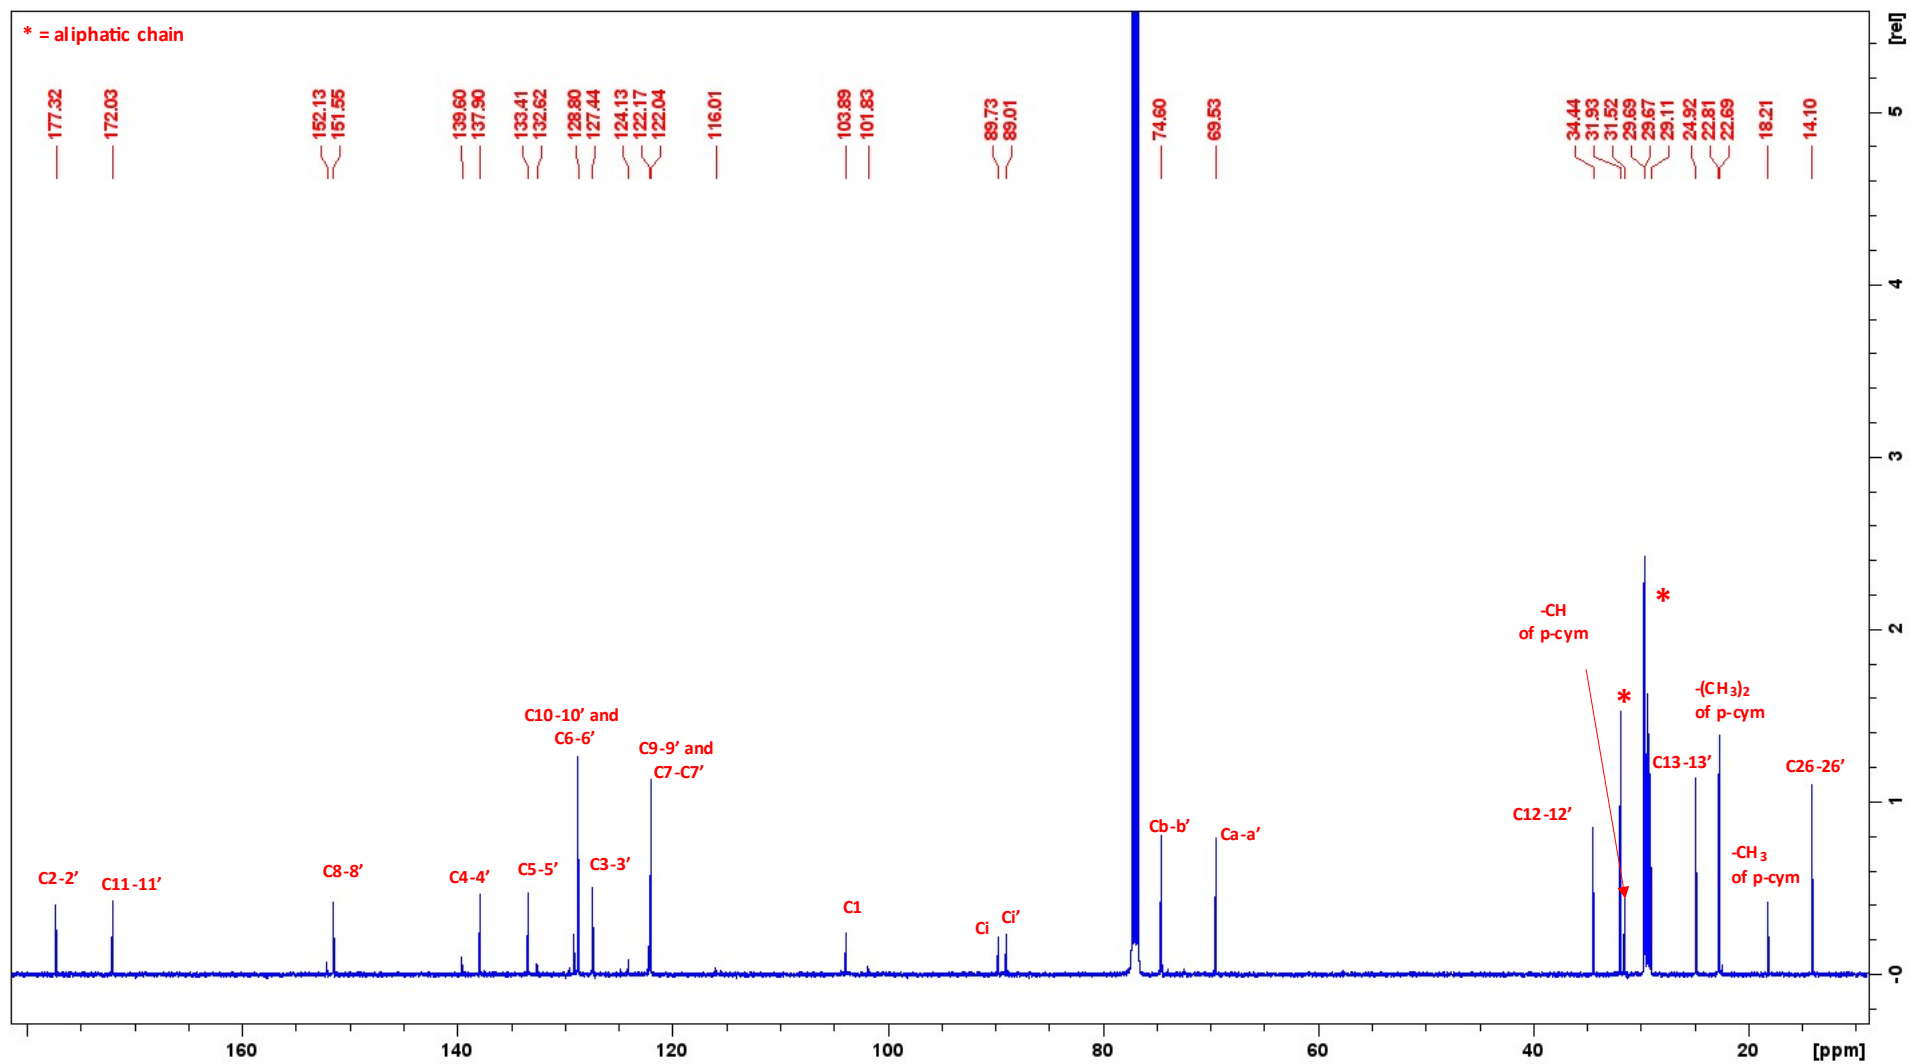

Figure S19. <sup>13</sup>C-NMR of **4** in CDCl<sub>3</sub> at 298 K

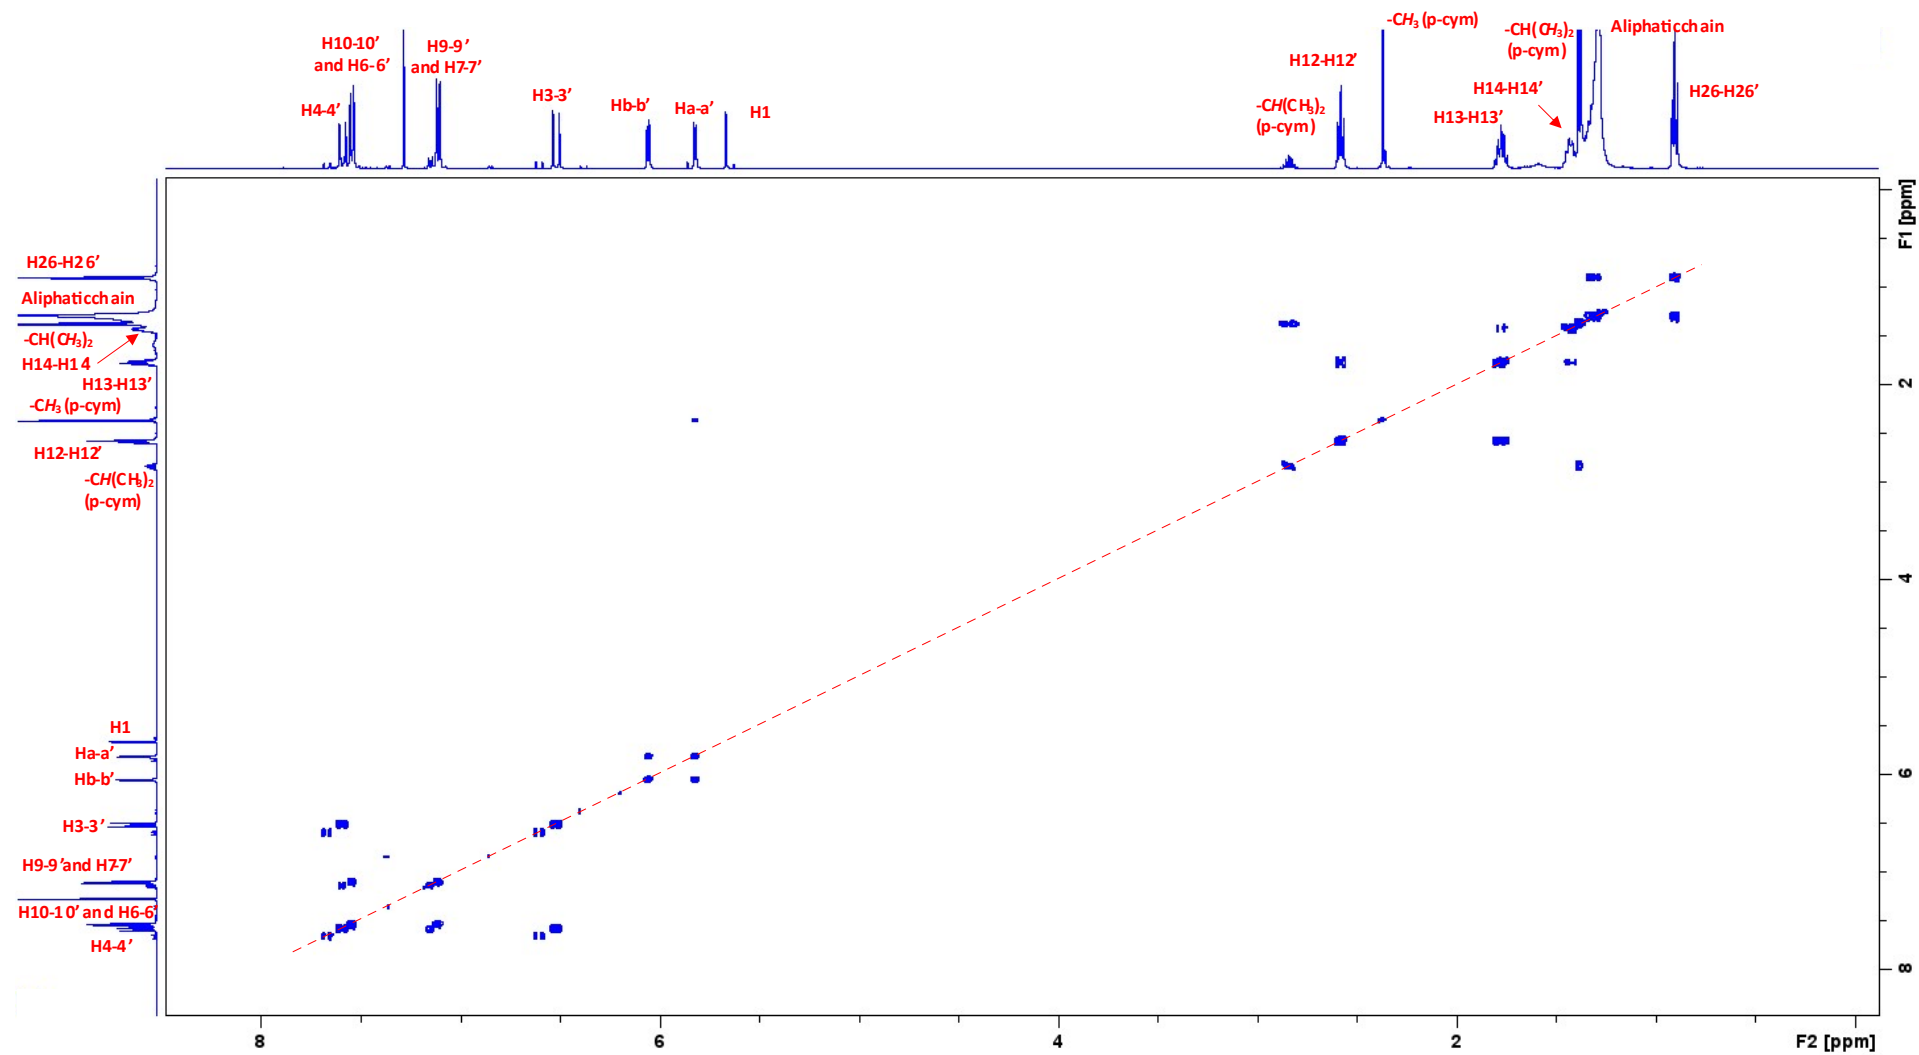

Figure S20.  $\{^1\text{H}-^1\text{H}\}$ -COSY NMR of **4** in  $\text{CDCl}_3$  at 293 K

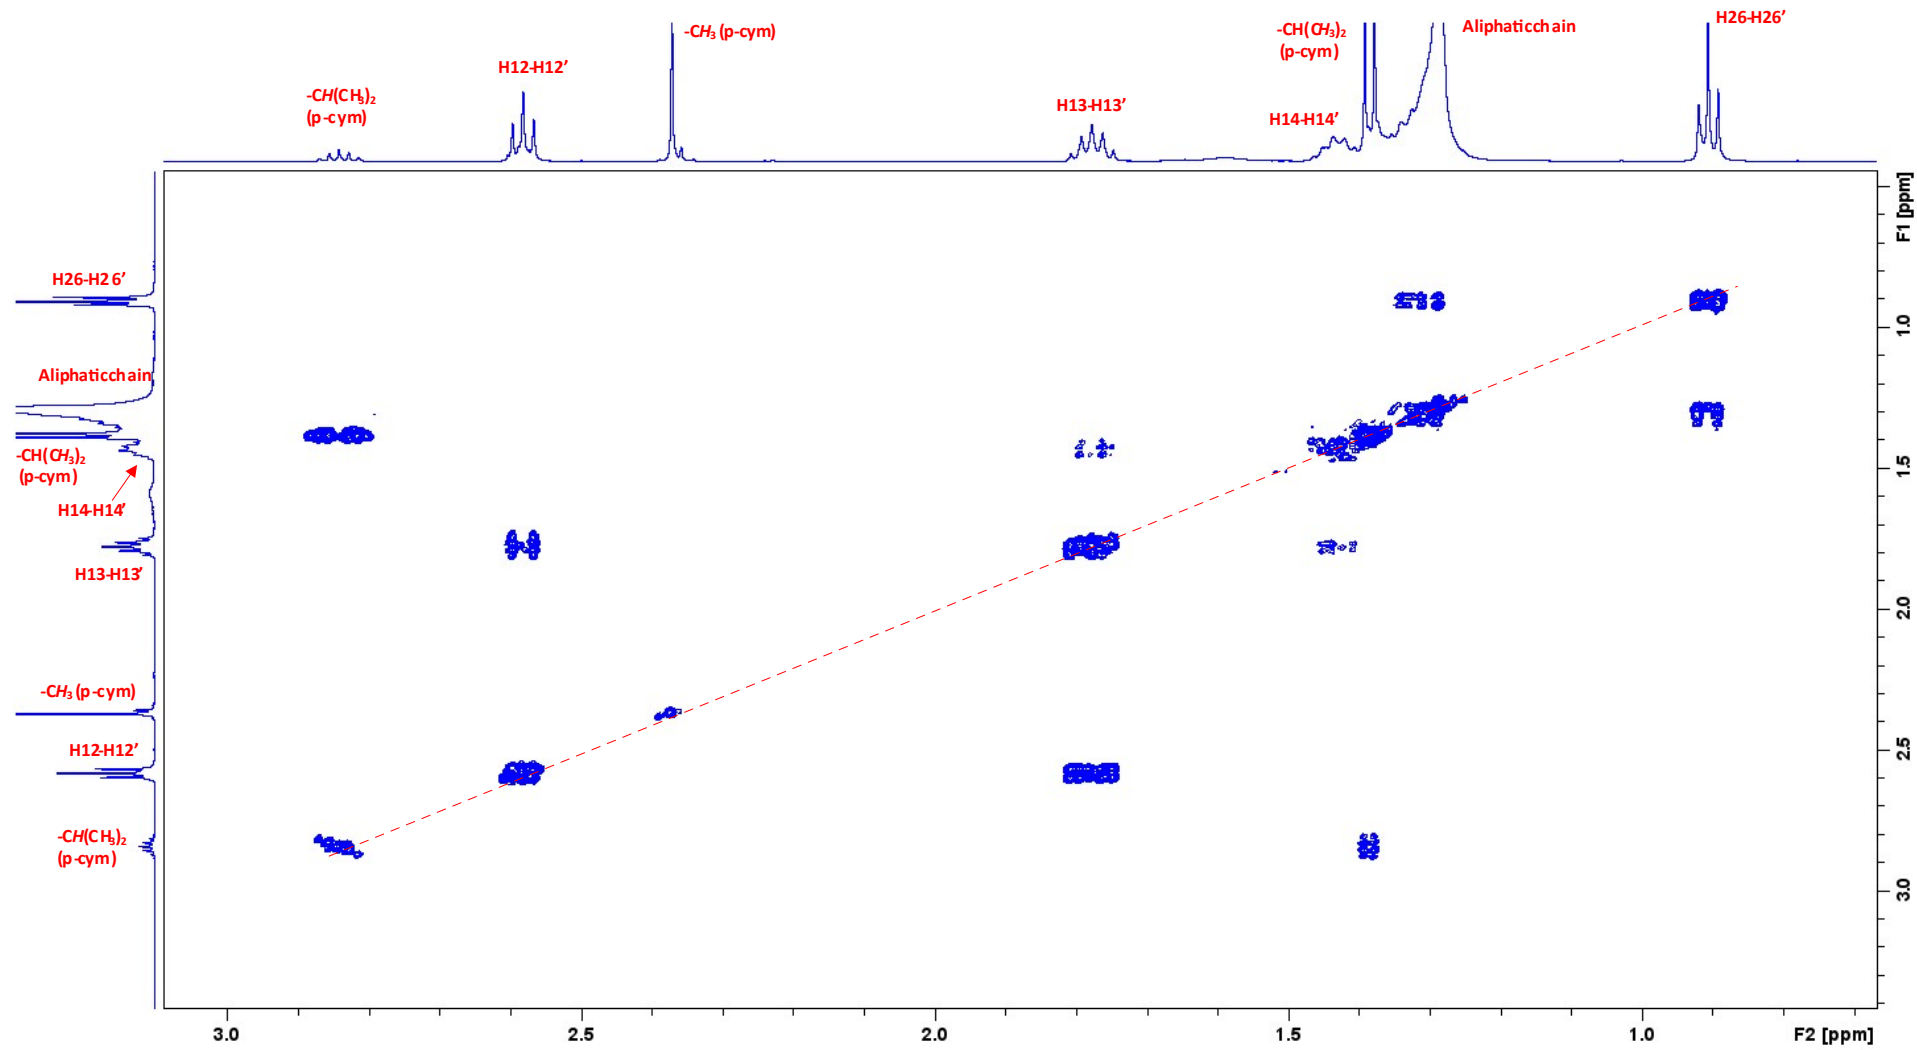

Figure S20 (a). Magnification of  $\{^1\text{H}-^1\text{H}\}$ -COSY NMR

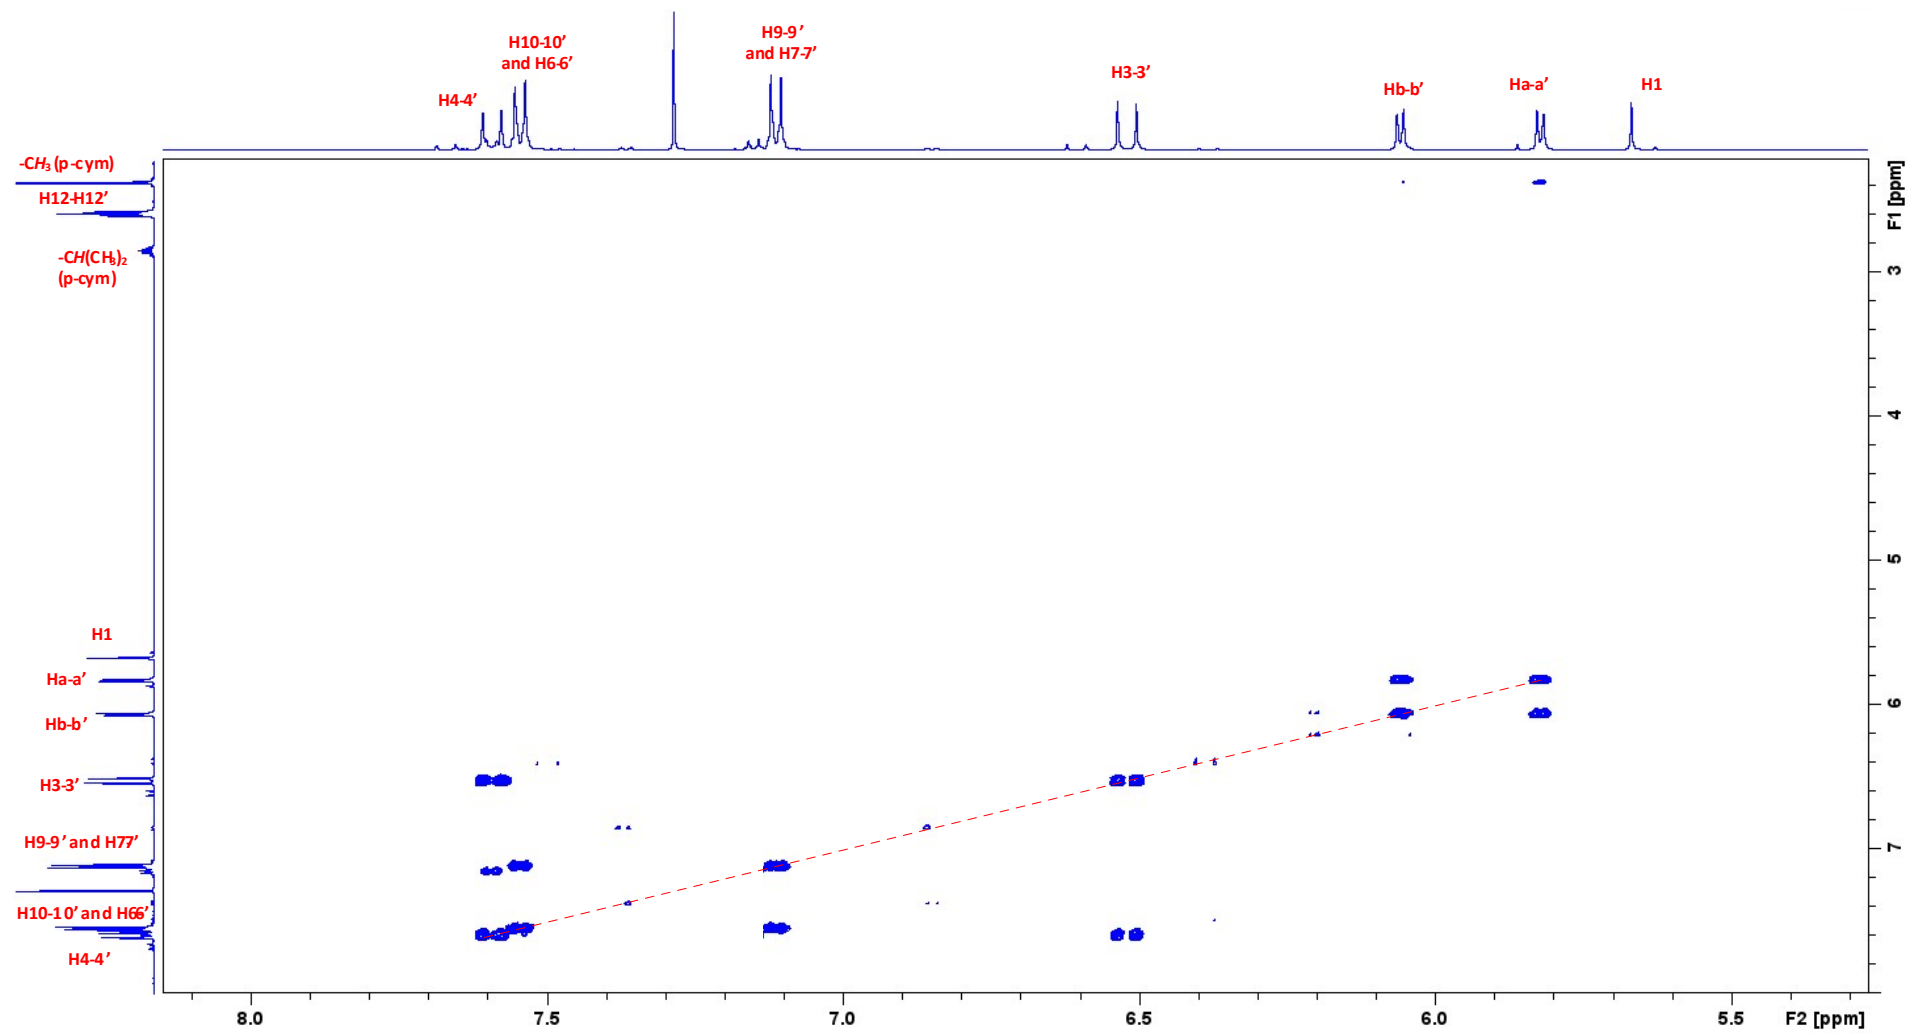

Figure S20 (b). Magnification of  $\{^1\text{H-}^1\text{H}\}$ -COSY NMR

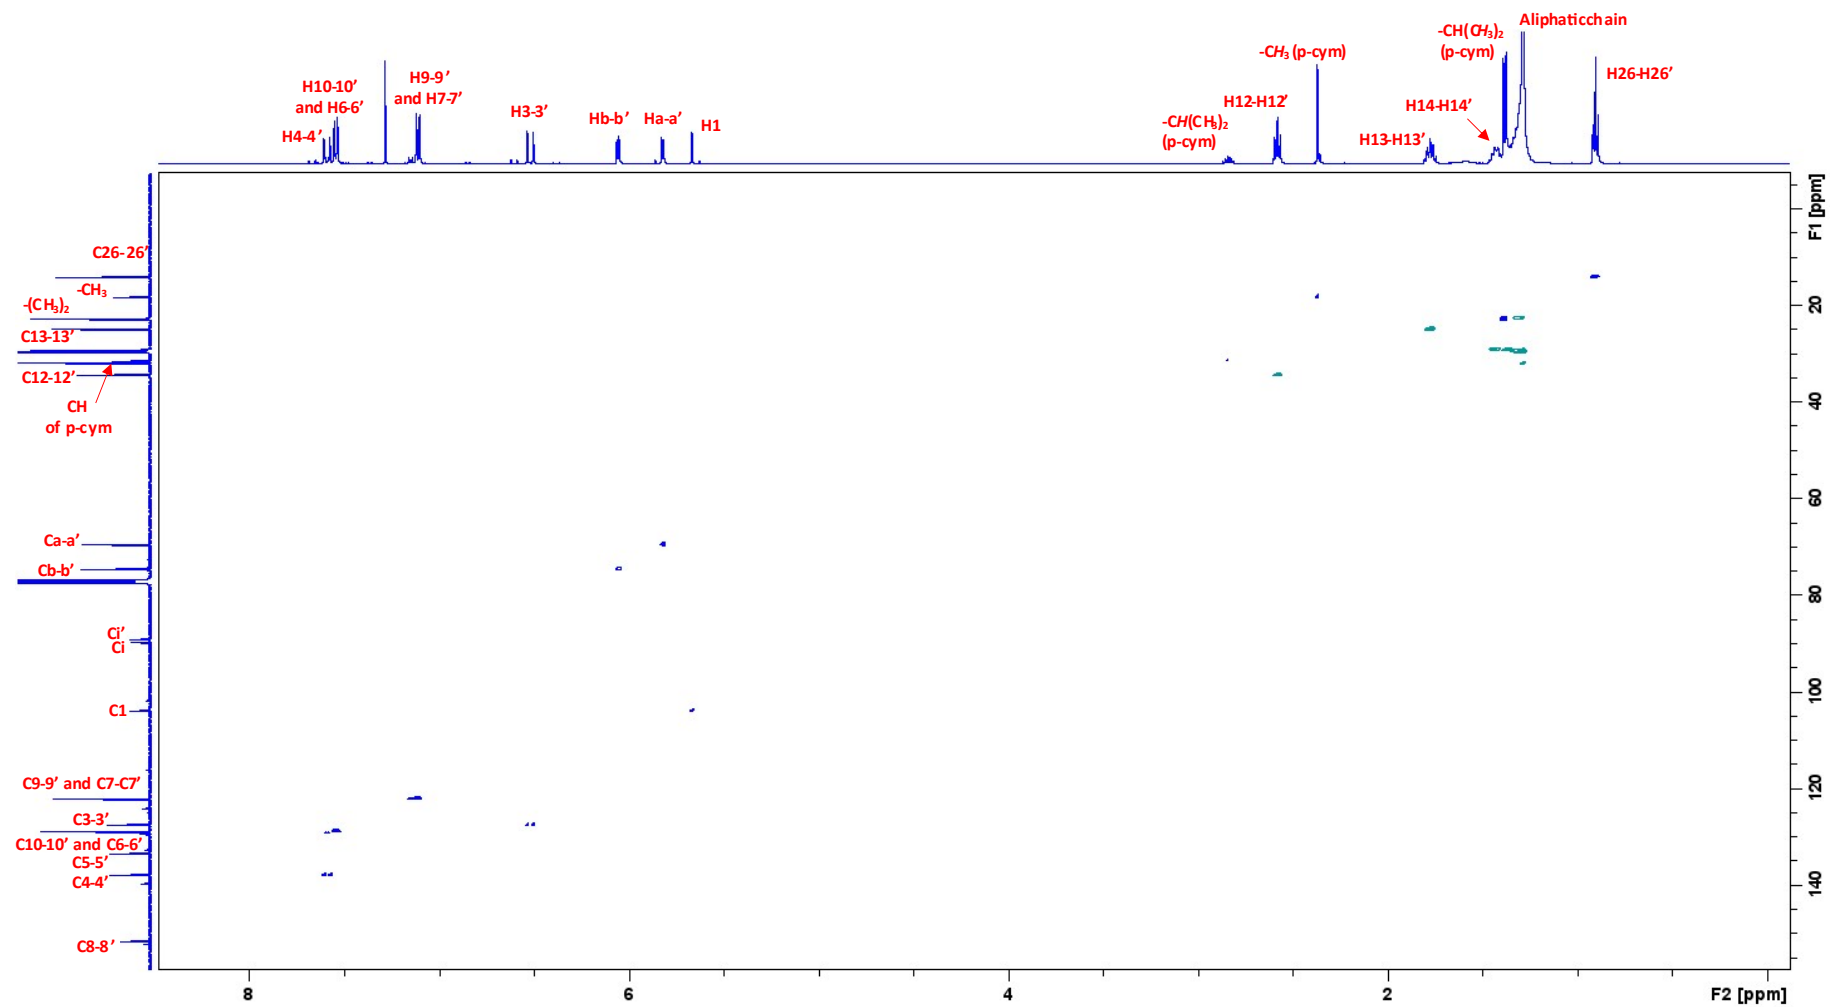

**Figure S21.**  $\{^1\text{H}$ - ${}^{13}\text{C}\}$ -HSQC NMR of **4** in  $\text{CDCl}_3$  at 293 K

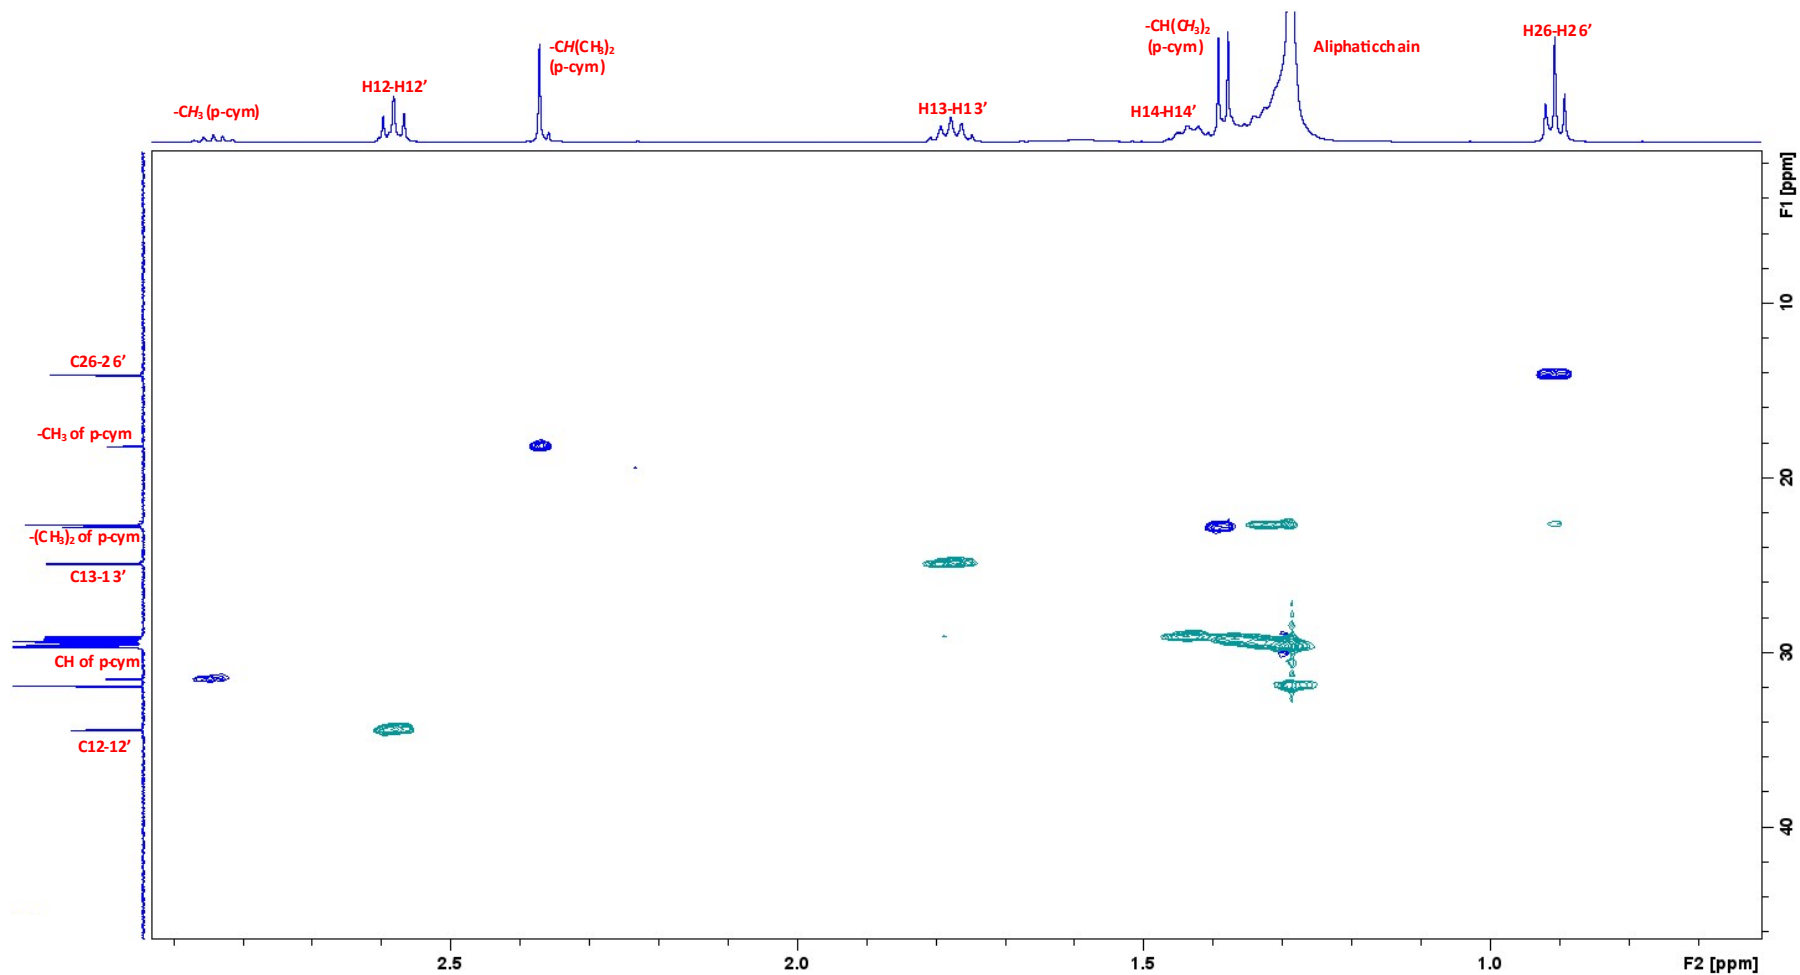

**Figure S21 (a).** Magnification of  $\{^1\text{H}-^{13}\text{C}\}$ -HSQC NMR

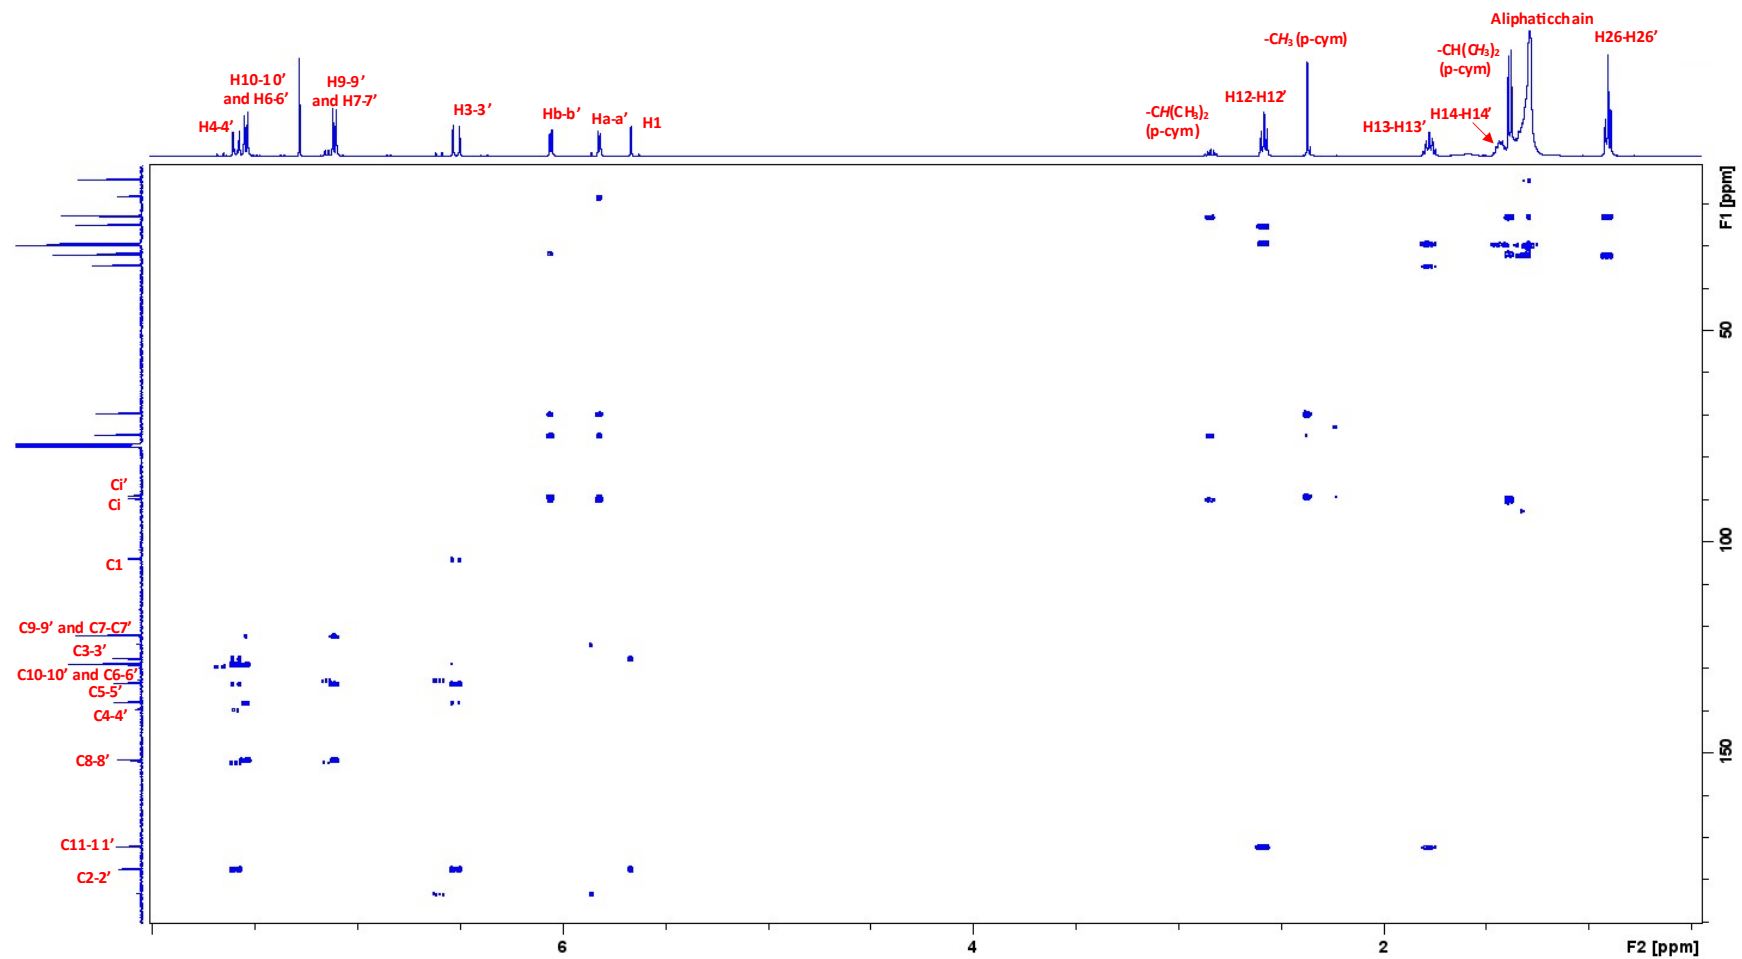

**Figure S22.**  $\{^1\text{H}-^{13}\text{C}\}$ -HMBC NMR of **4** in  $\text{CDCl}_3$  at 293 K



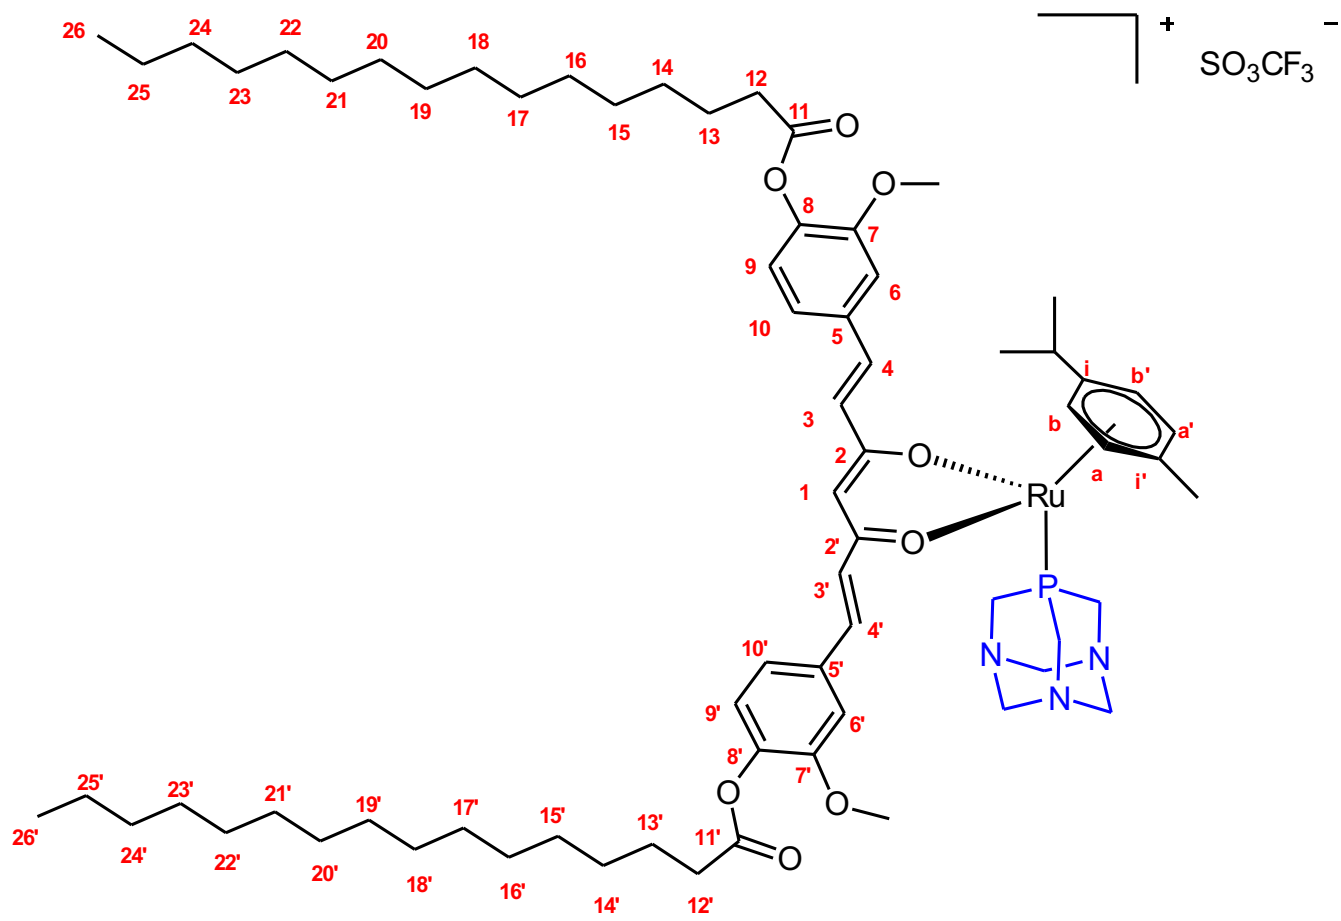

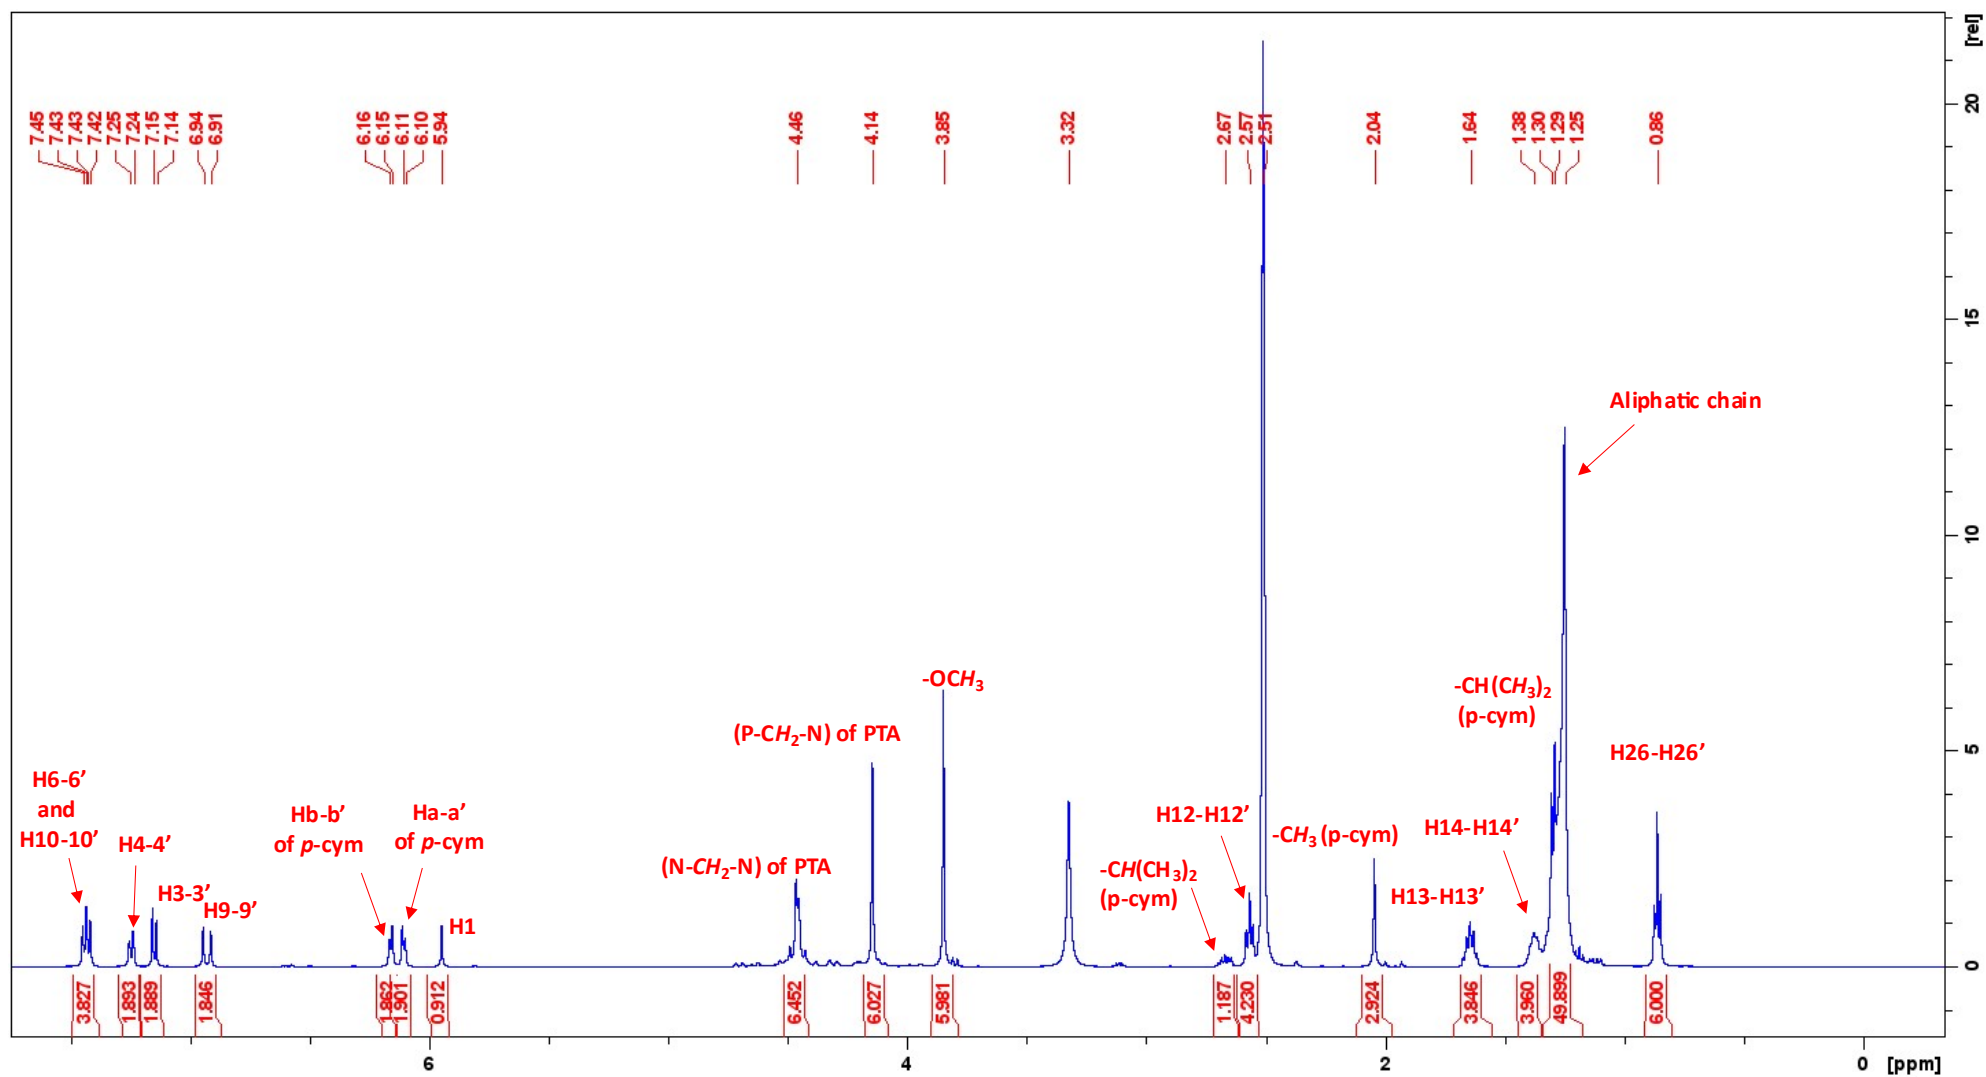

Figure S23.  $^1\text{H-NMR}$  of 5 in DMSO at 293 K

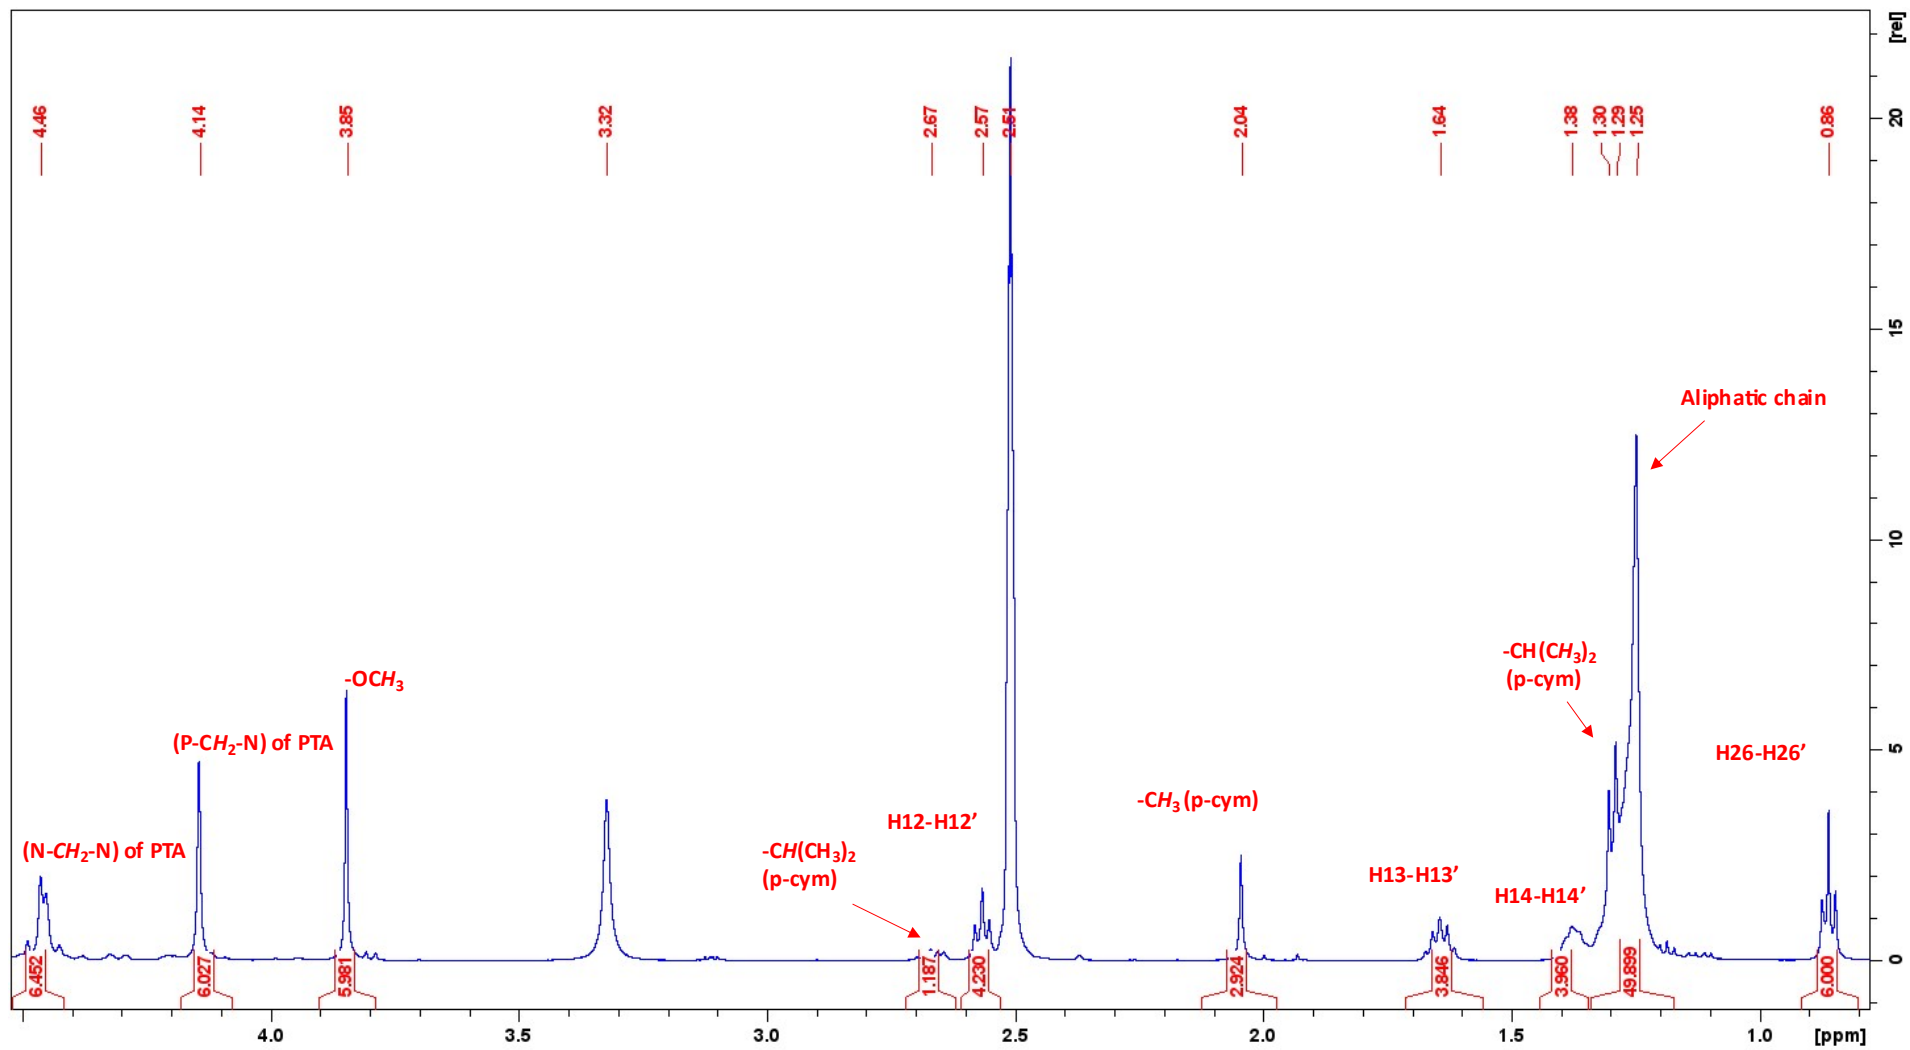

Figure S23 (a). Magnification of <sup>1</sup>H-NMR (1-5 ppm)

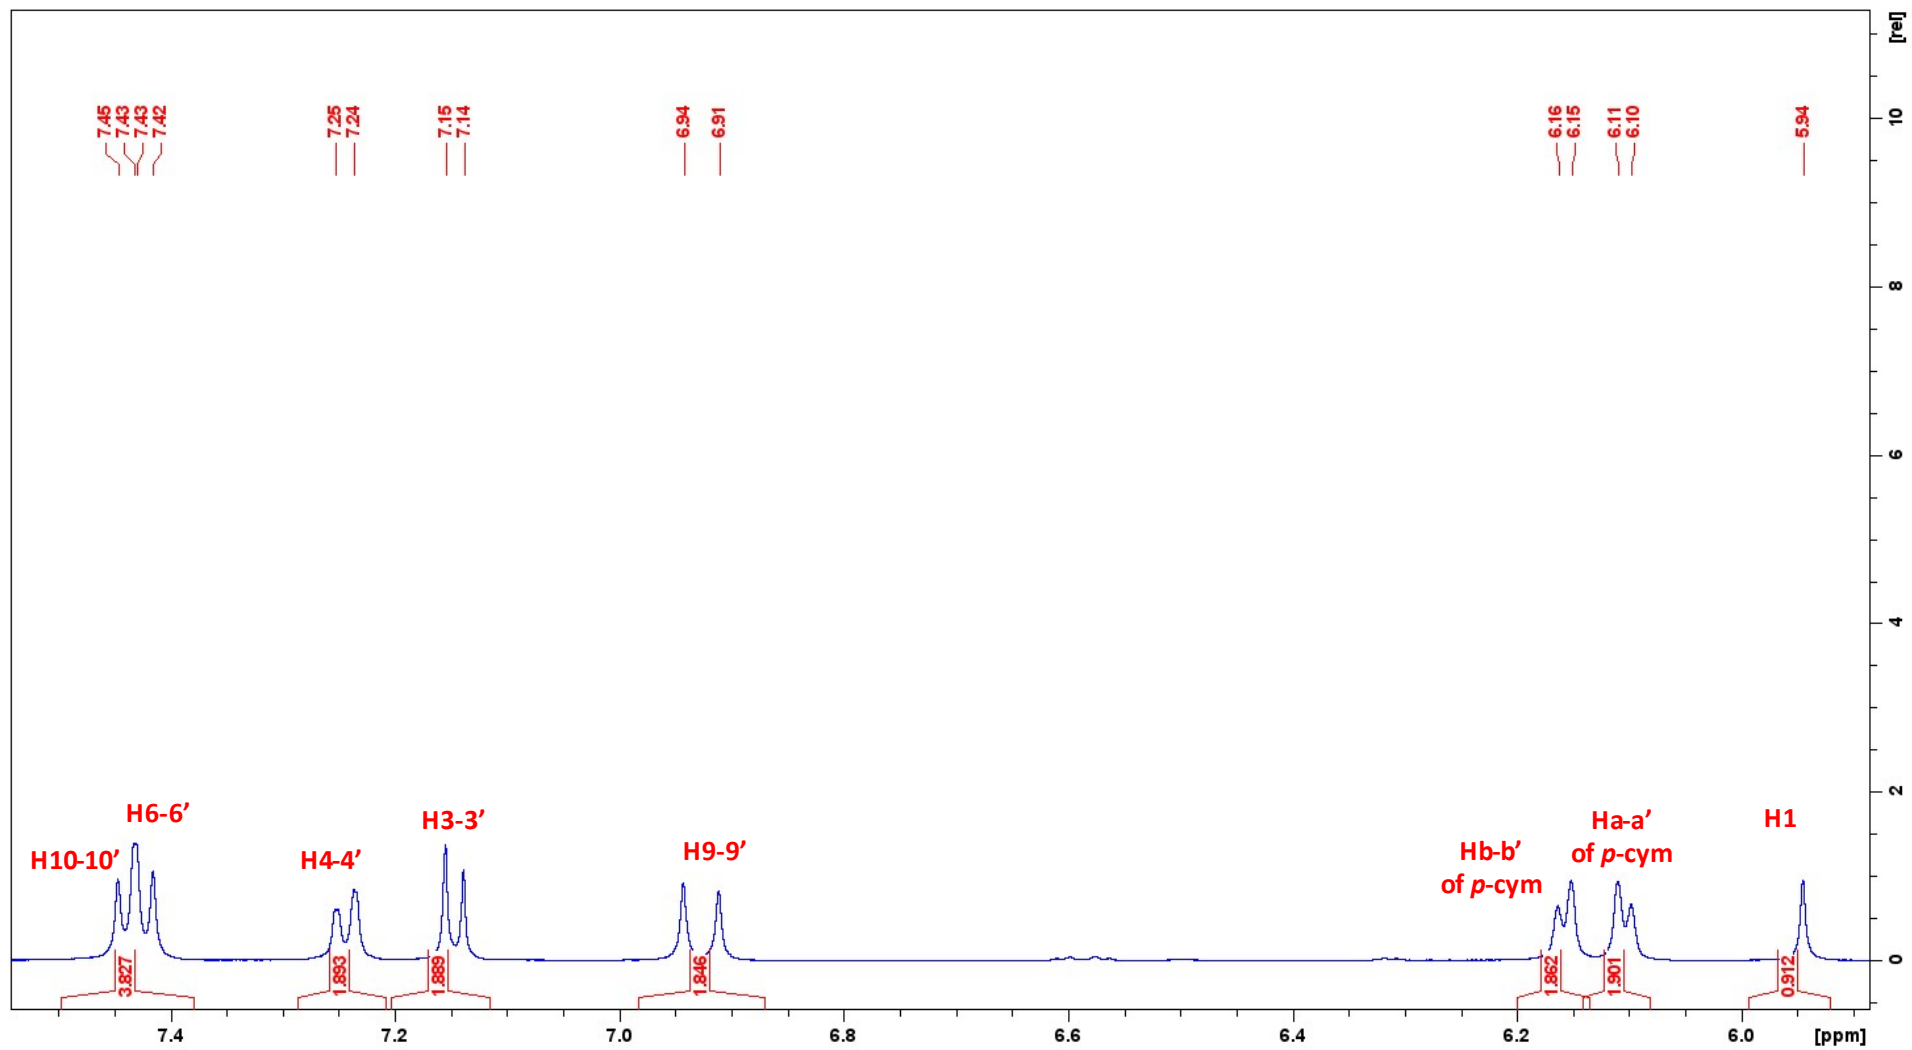

Figure S23 (b). Magnification of <sup>1</sup>H-NMR (6-8 ppm)

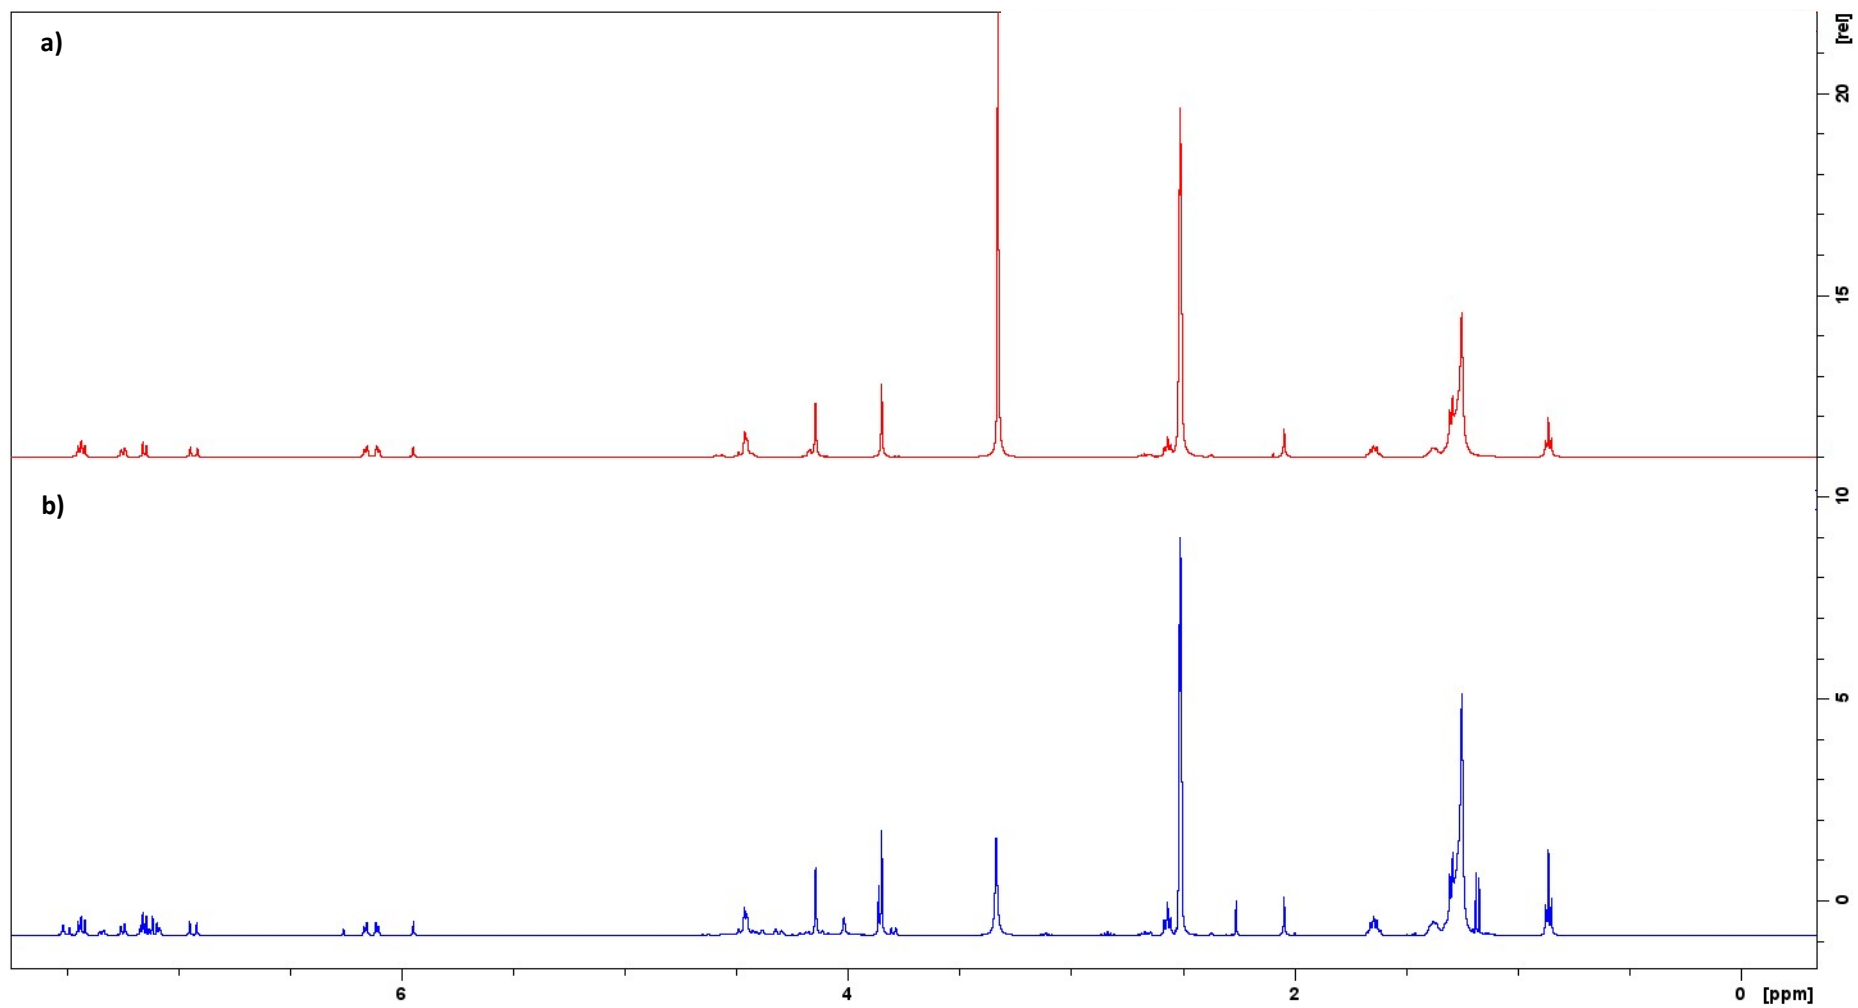

**Figure S23 (c).** Comparison of <sup>1</sup>H-NMR spectra of complex **5** at t=0 (a) and after 5 days (b)

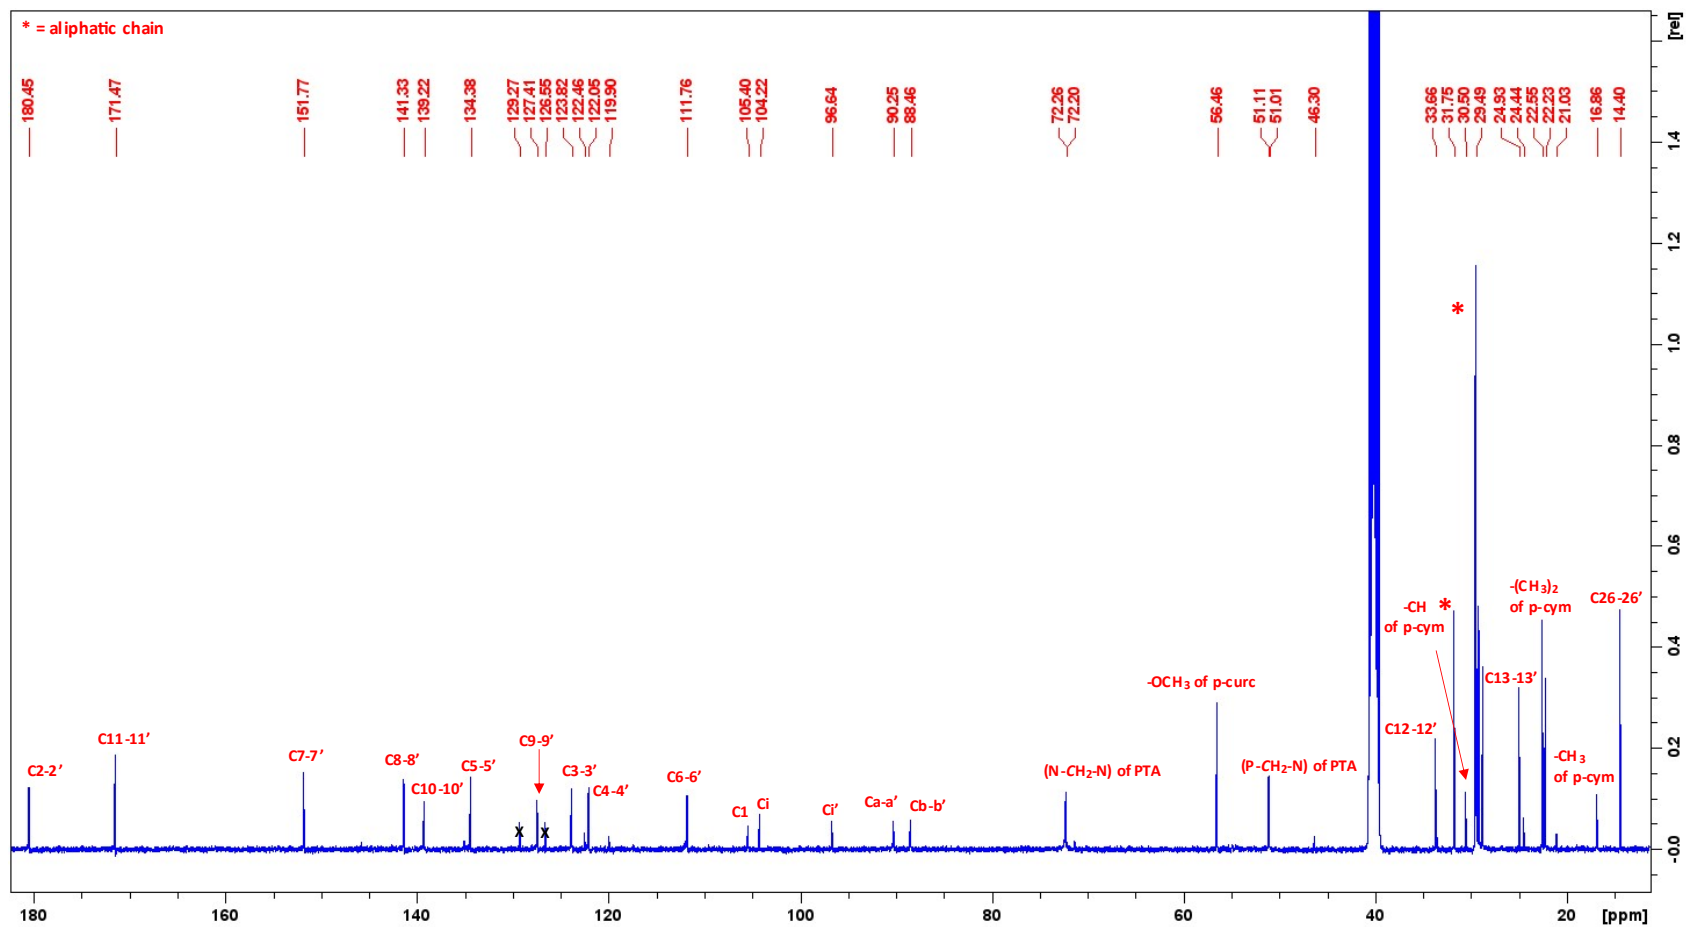

Figure S24. <sup>13</sup>C-NMR of 5 in DMSO at 293 K

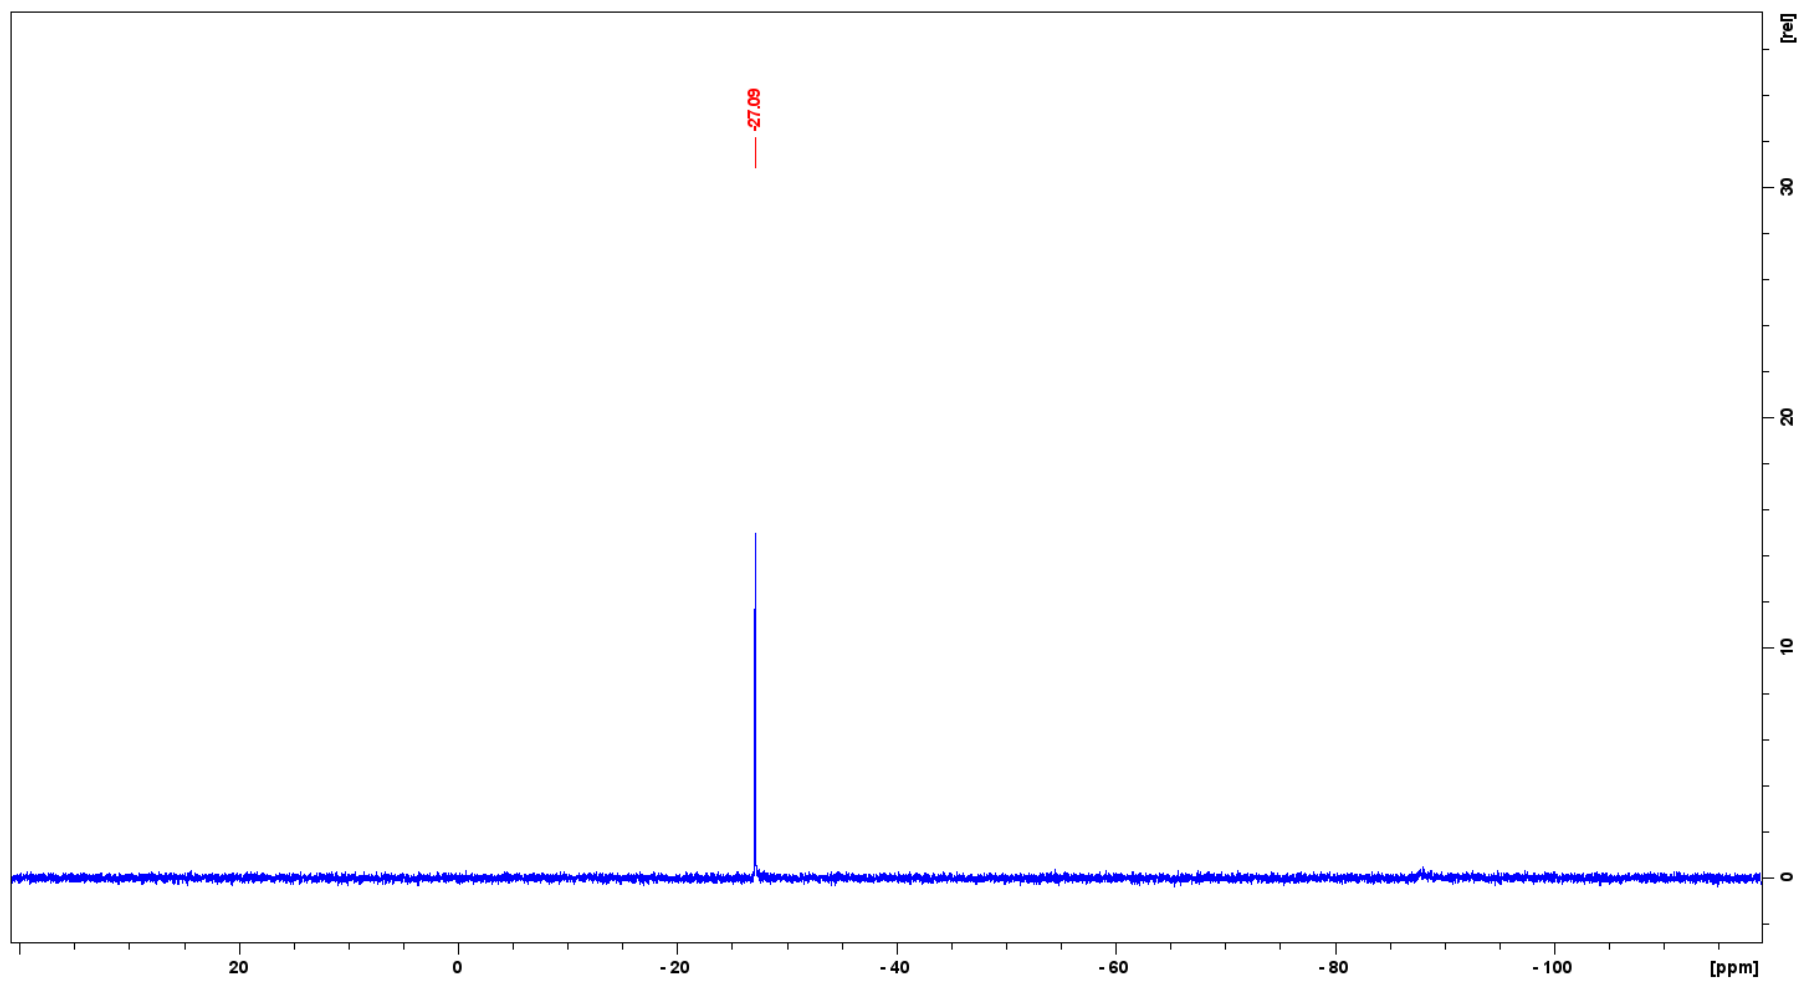

**Figure S25.**  $^{31}\text{P}$ -NMR of **5** in DMSO at 293 K

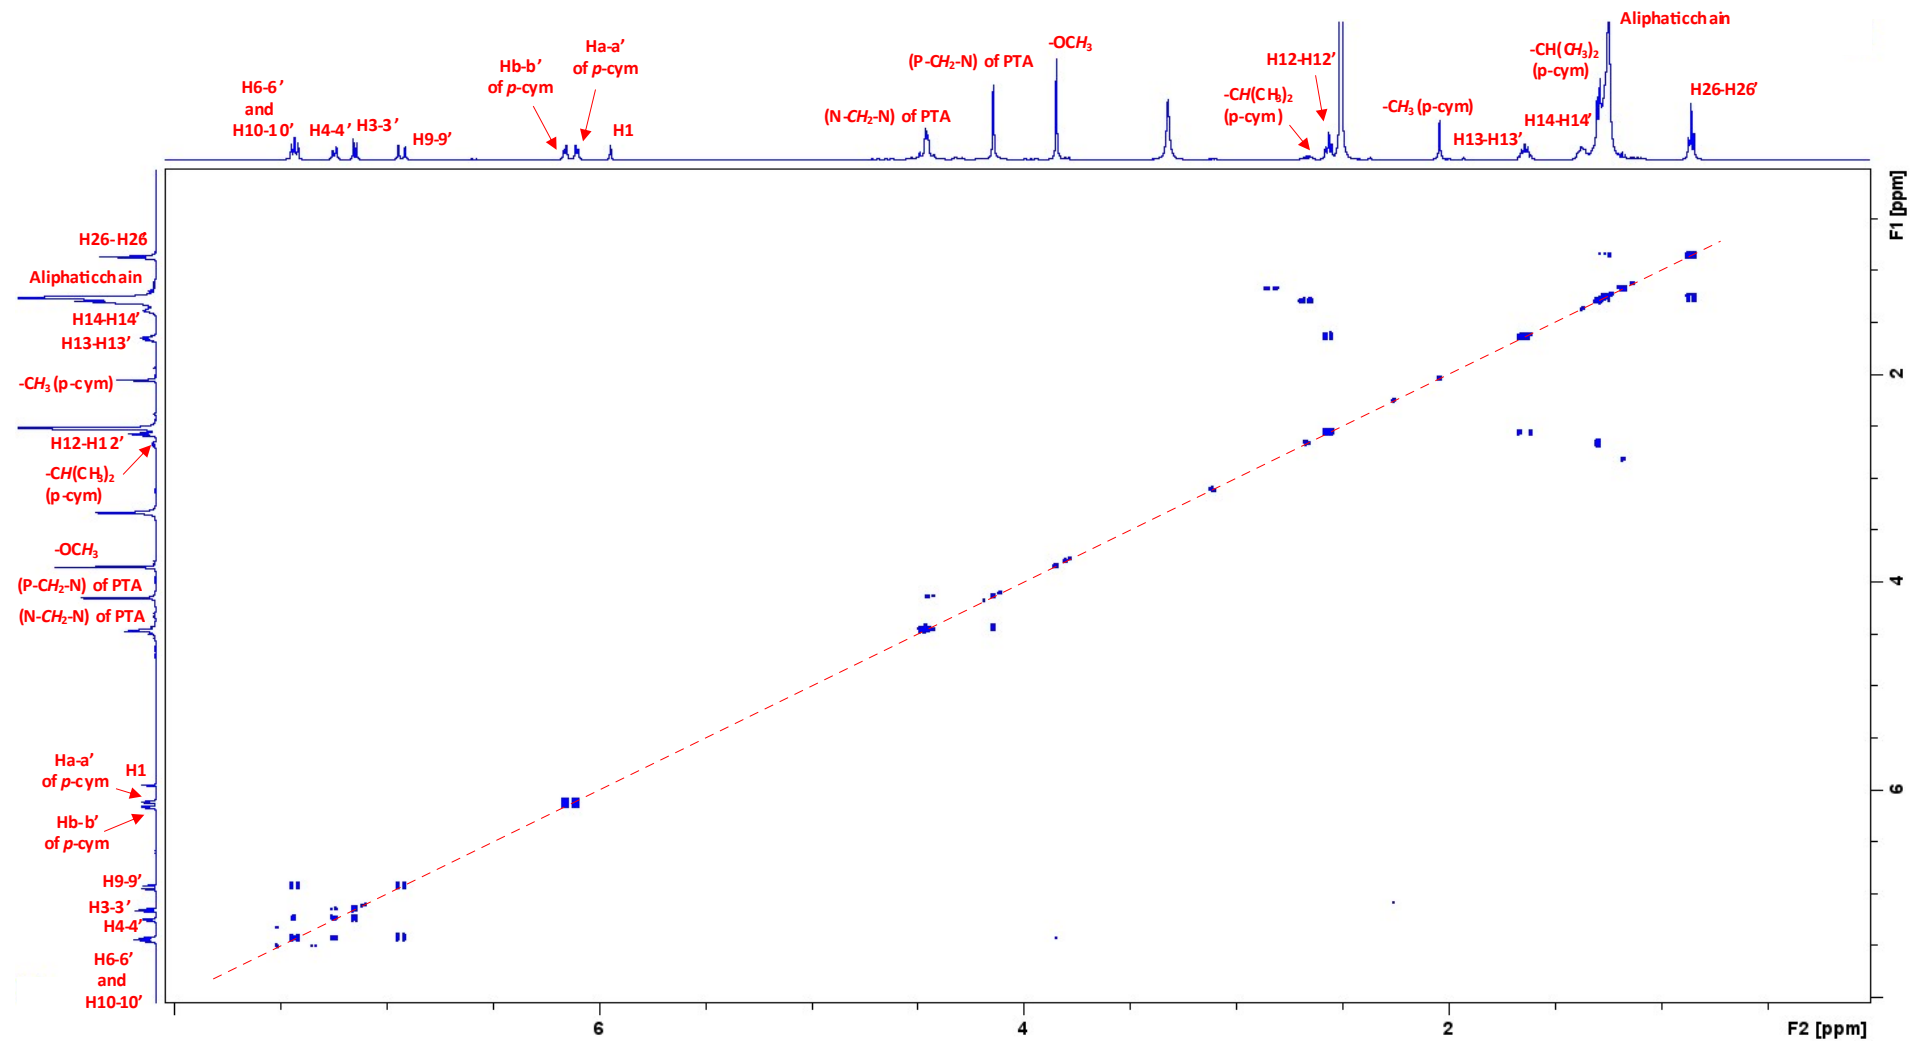

Figure S26.  $\{^1\text{H}-^1\text{H}\}$ - COSY NMR of **5** in DMSO at 293 K.



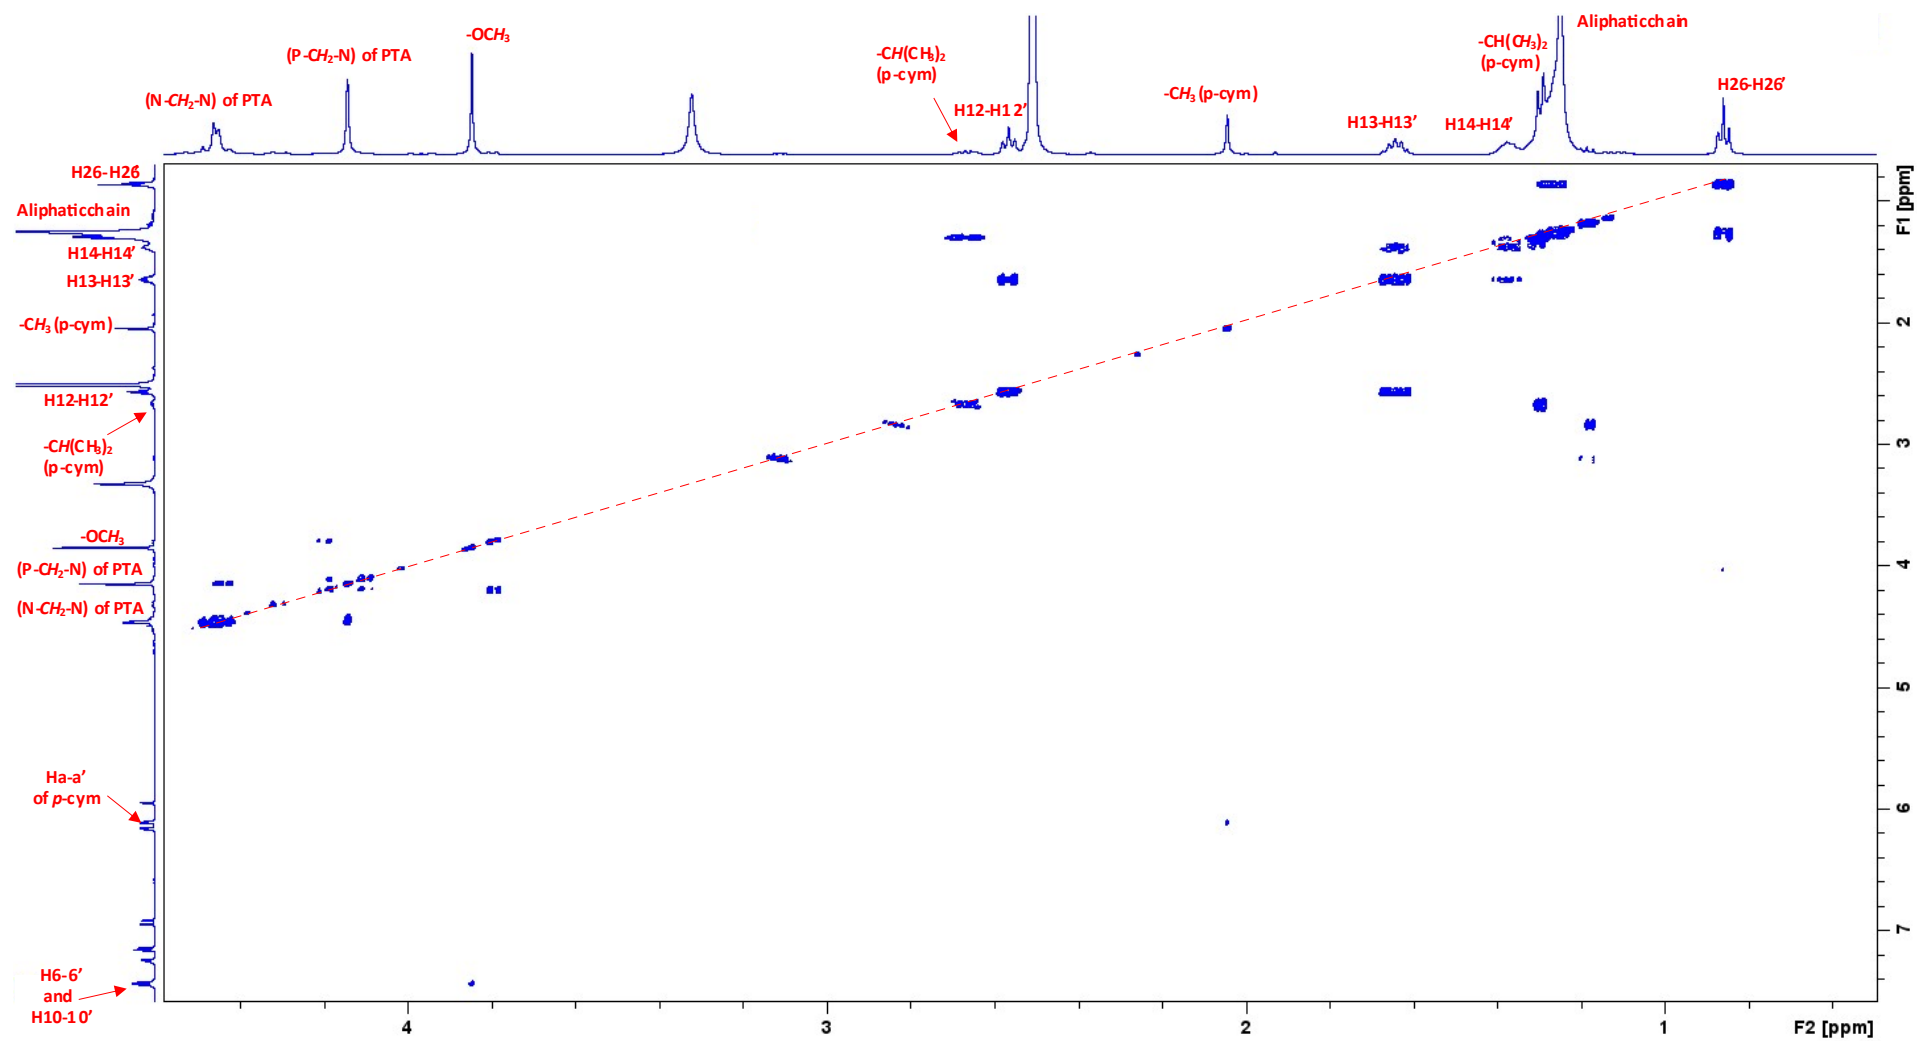

Figure S26 (a). Magnification of  $\{^1\text{H}-^1\text{H}\}$ - COSY NMR

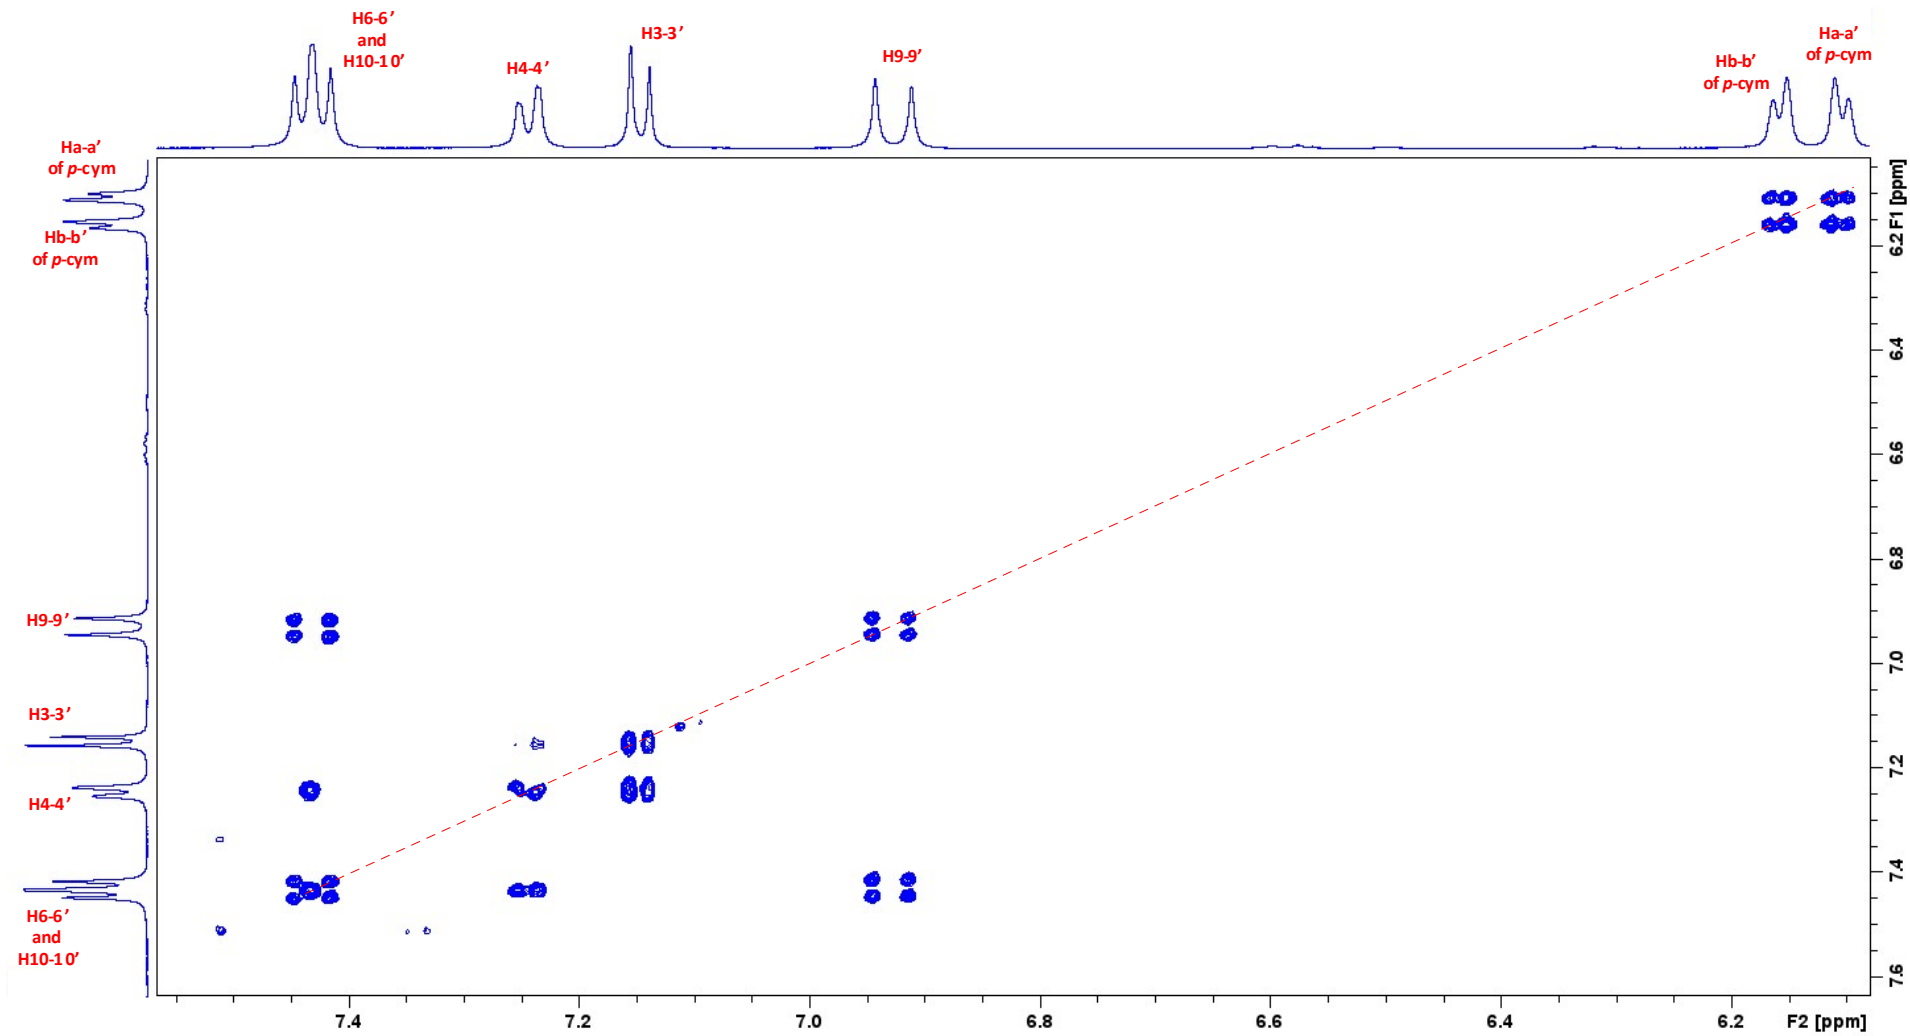

Figure S26 (b). Magnification of  $\{^1\text{H}-^1\text{H}\}$ - COSY NMR

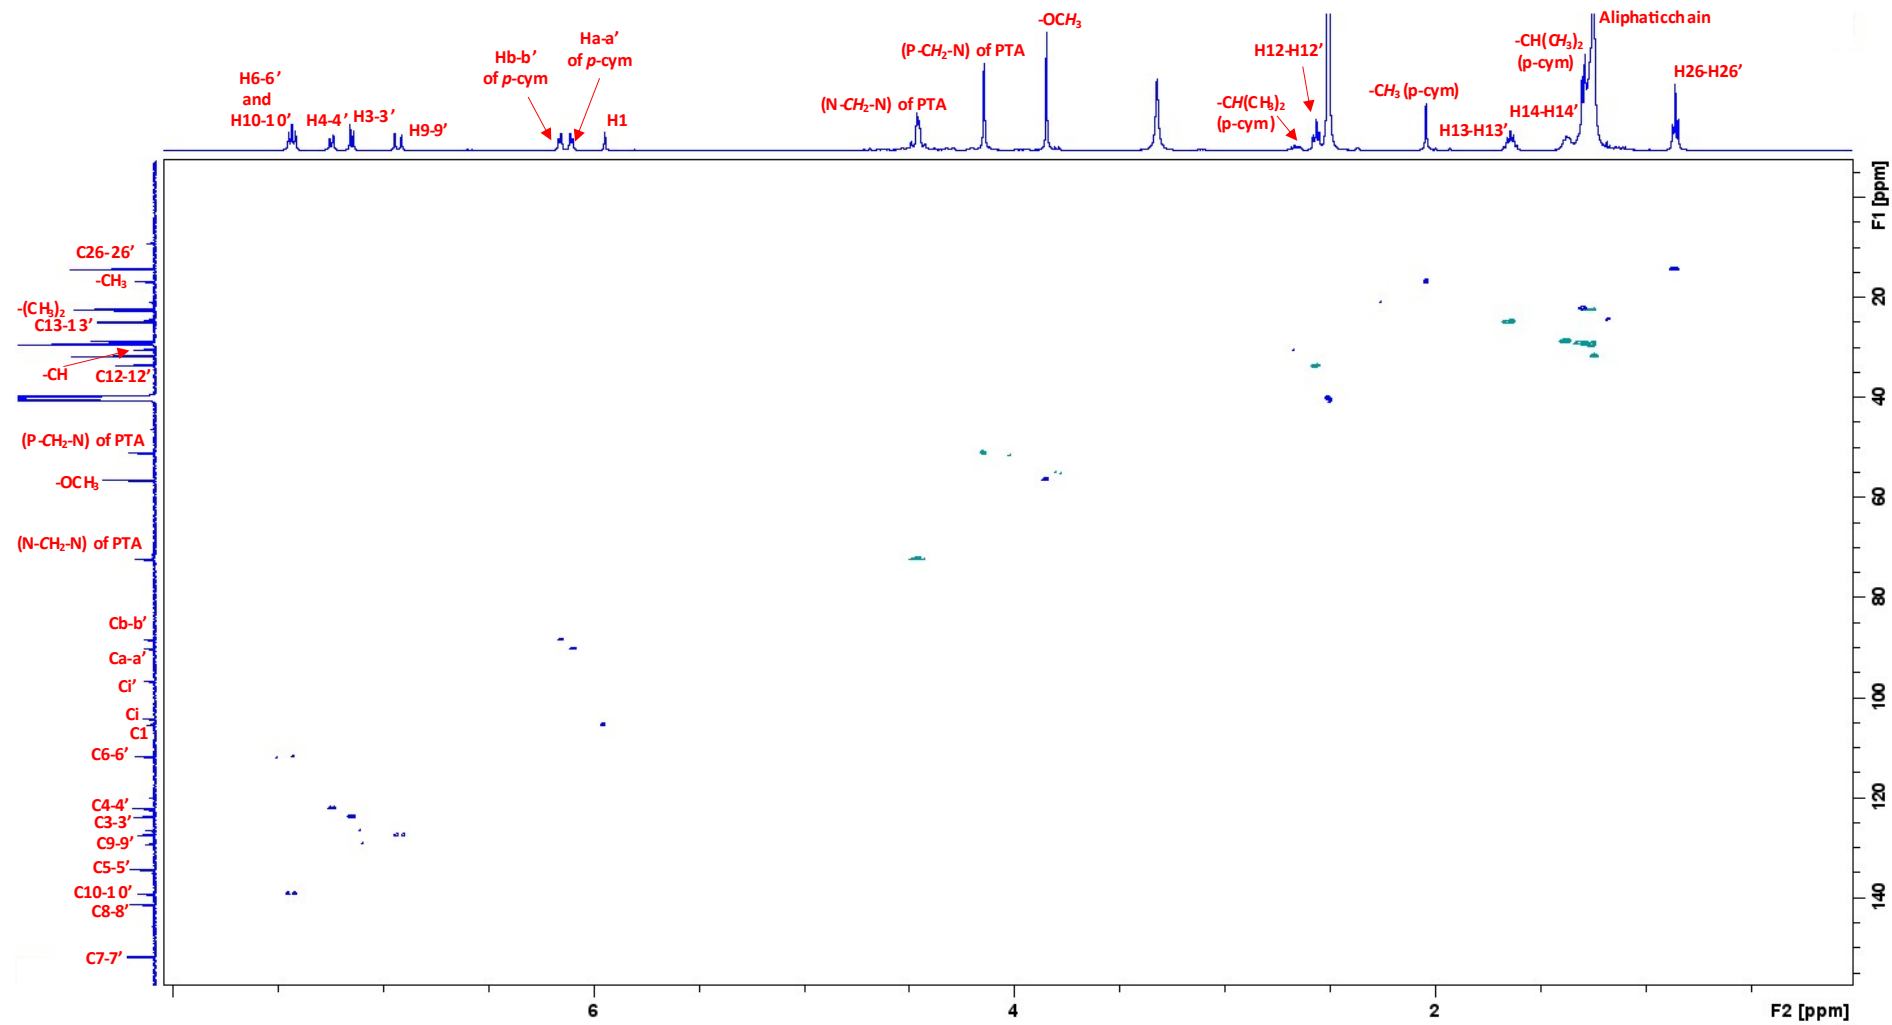

**Figure S27.**  $\{^1\text{H}-^{13}\text{C}\}$ -HSQC NMR of **5** in DMSO at 293 K

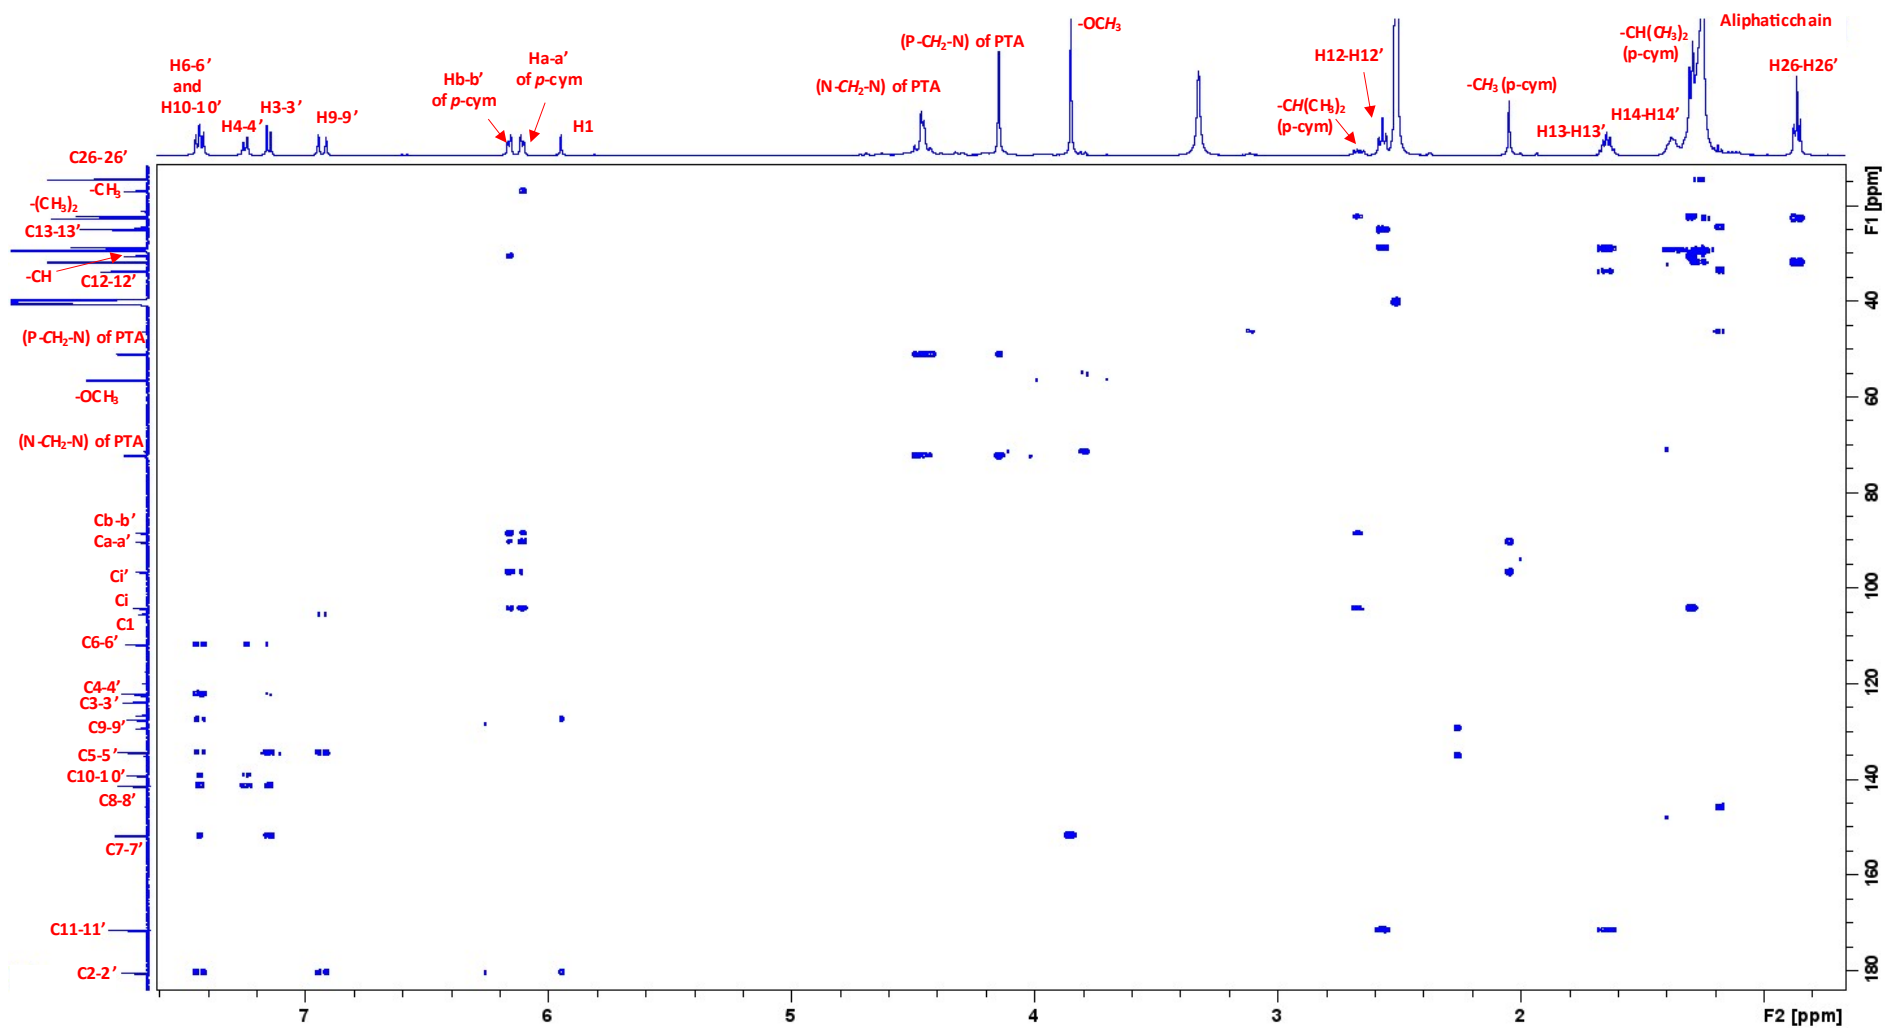

Figure S28.  $\{^1\text{H}-^{13}\text{C}\}$ -HMBC NMR of **5** in DMSO at 293 K

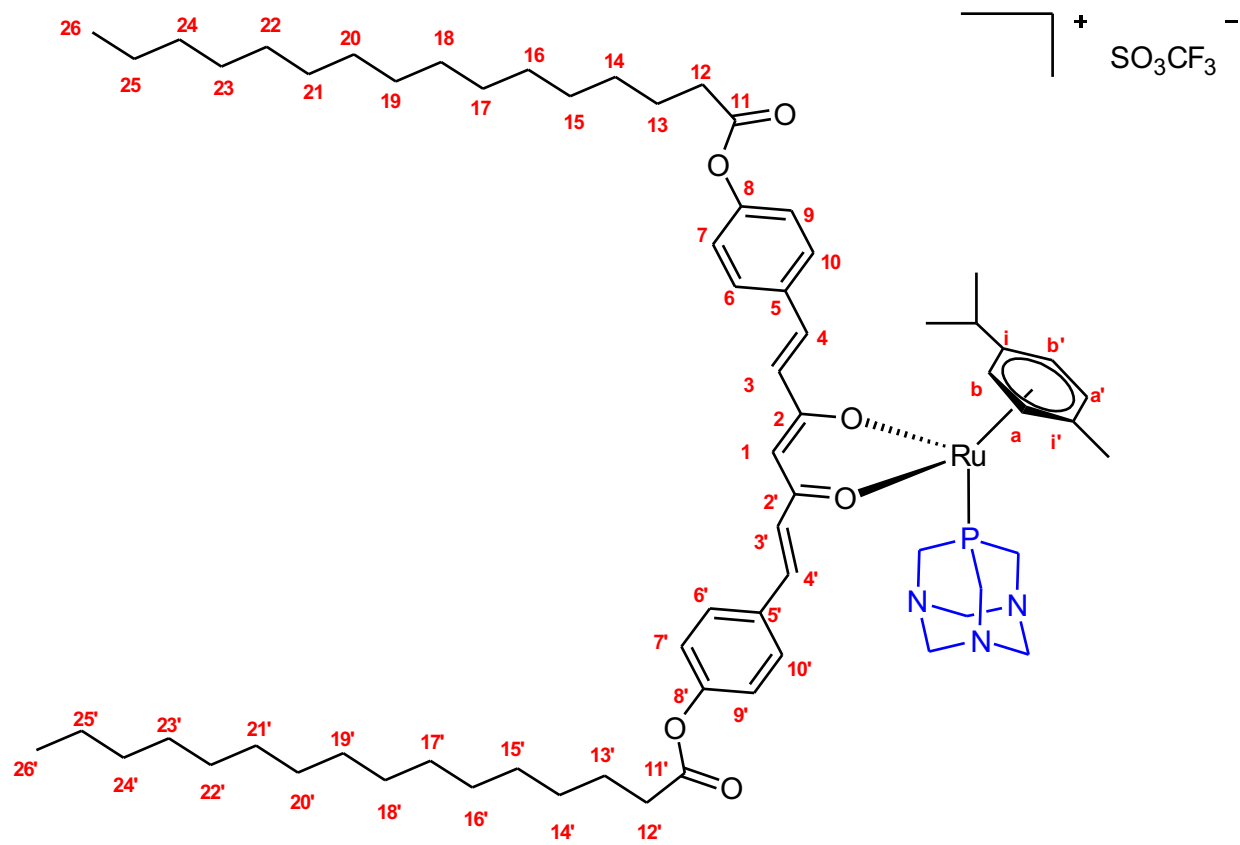

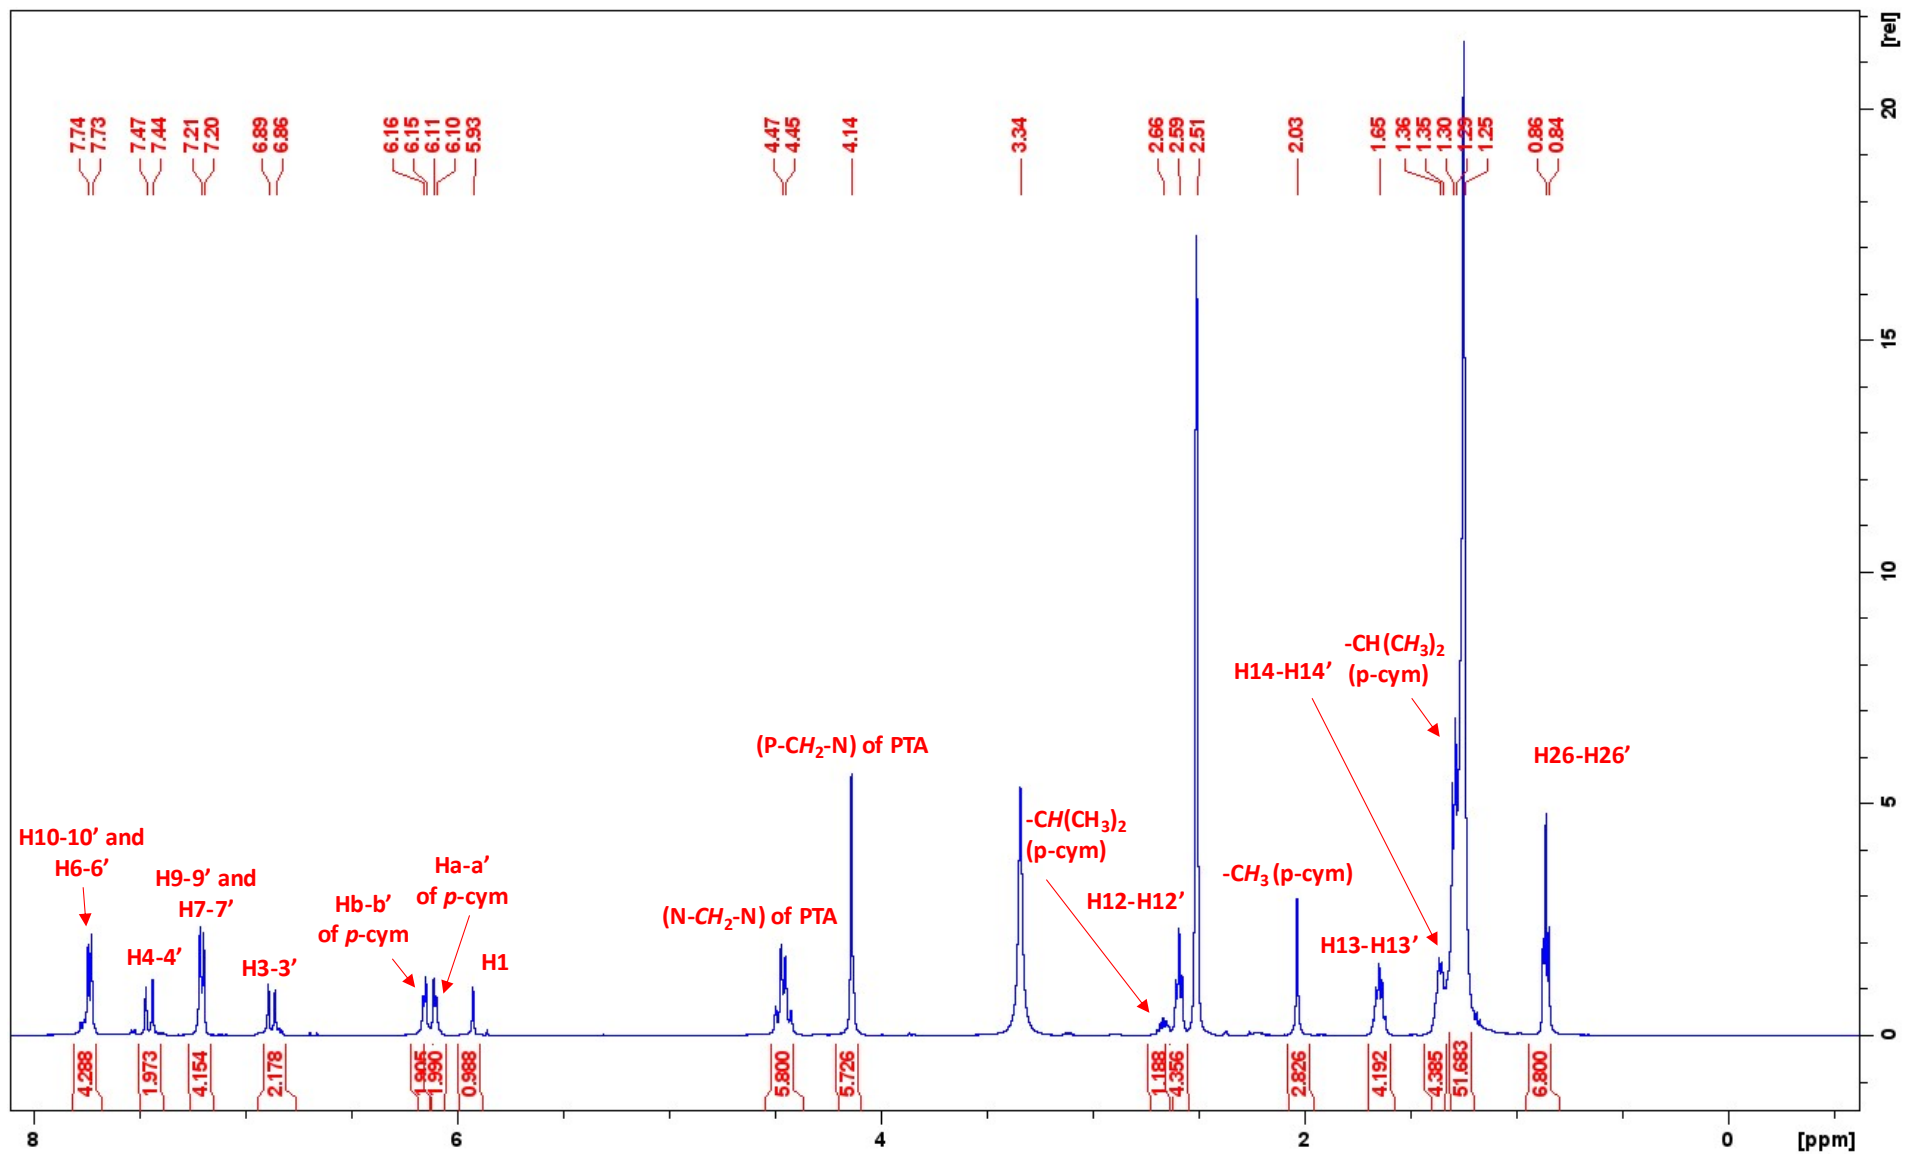

Figure S29. <sup>1</sup>H-NMR of 6 in DMSO at 293 K

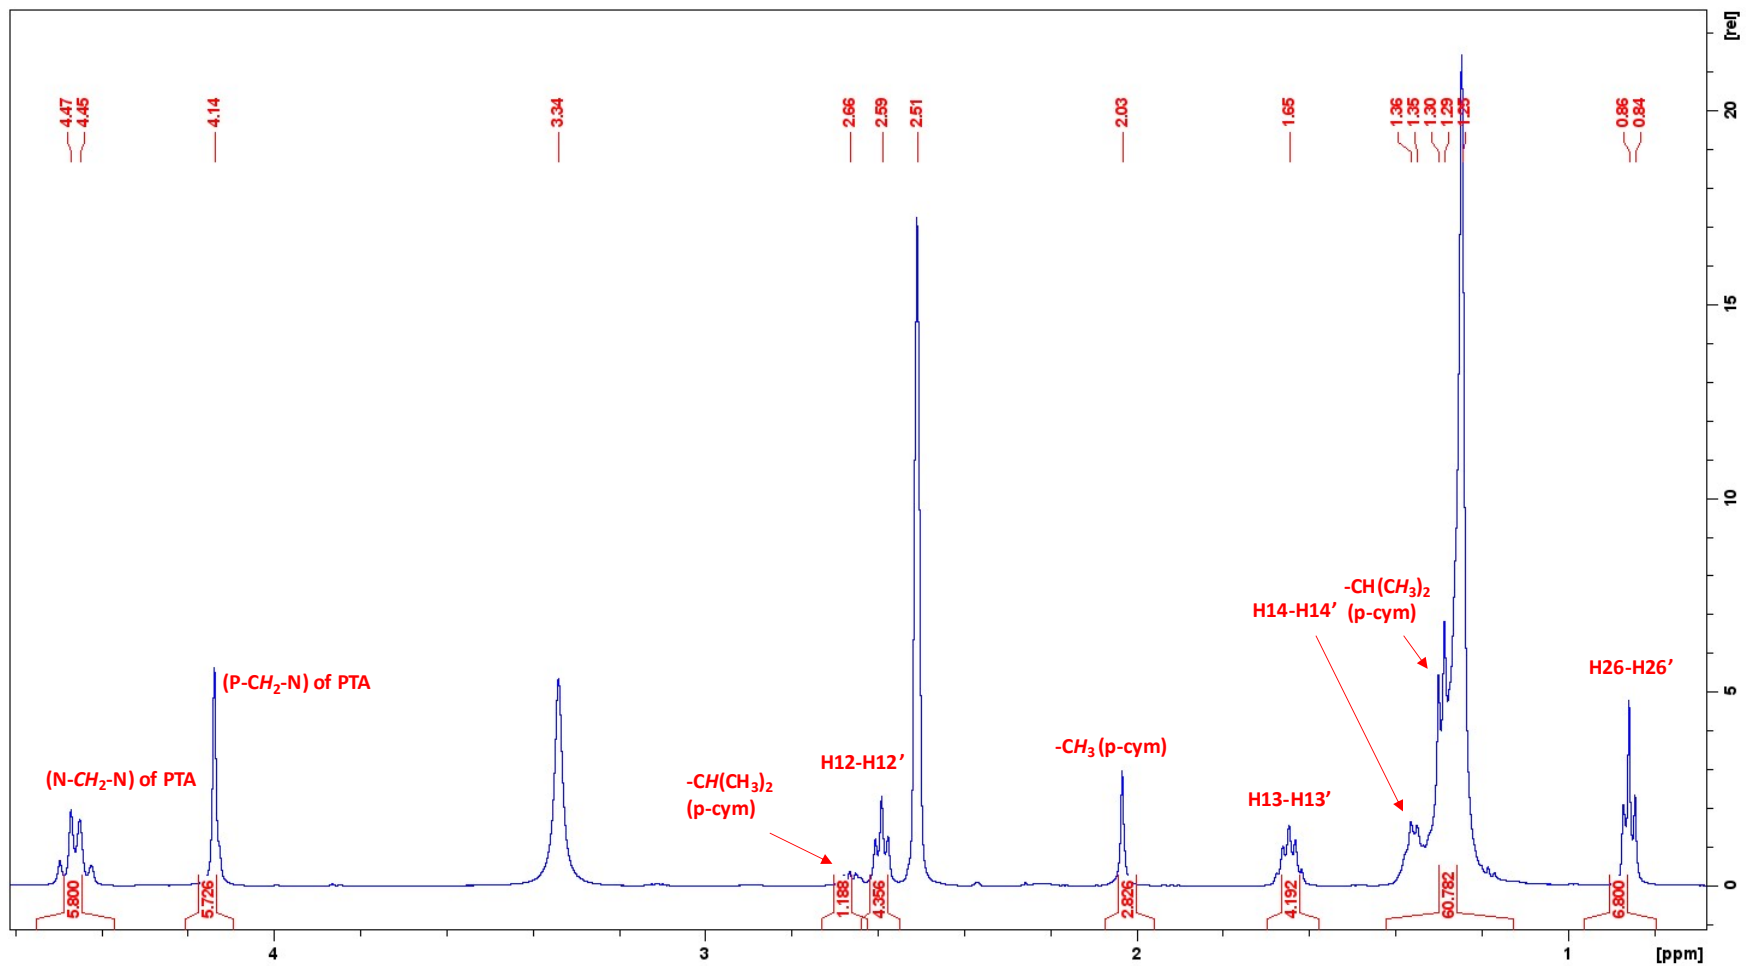

Figure S29 (a). Magnification of <sup>1</sup>H-NMR (1-5 ppm)

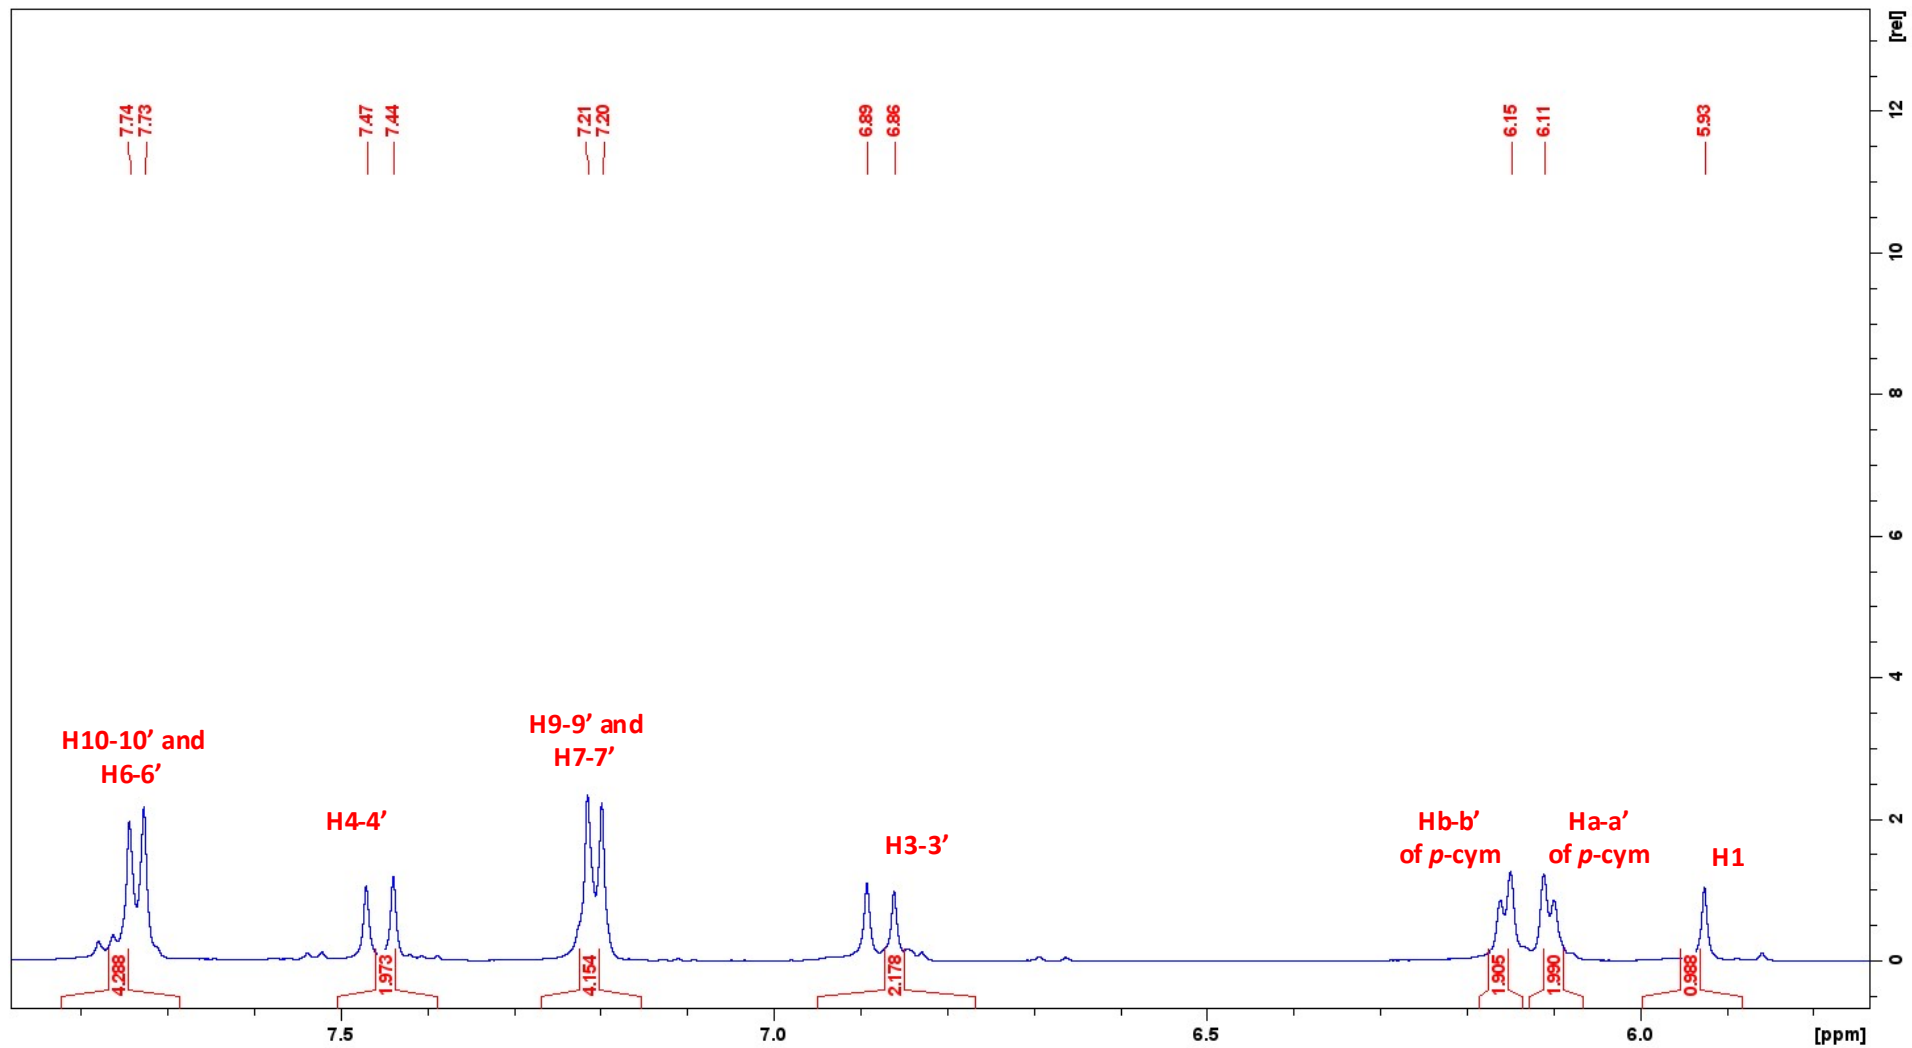

Figure S29 (b). Magnification of <sup>1</sup>H-NMR (5-8 ppm)



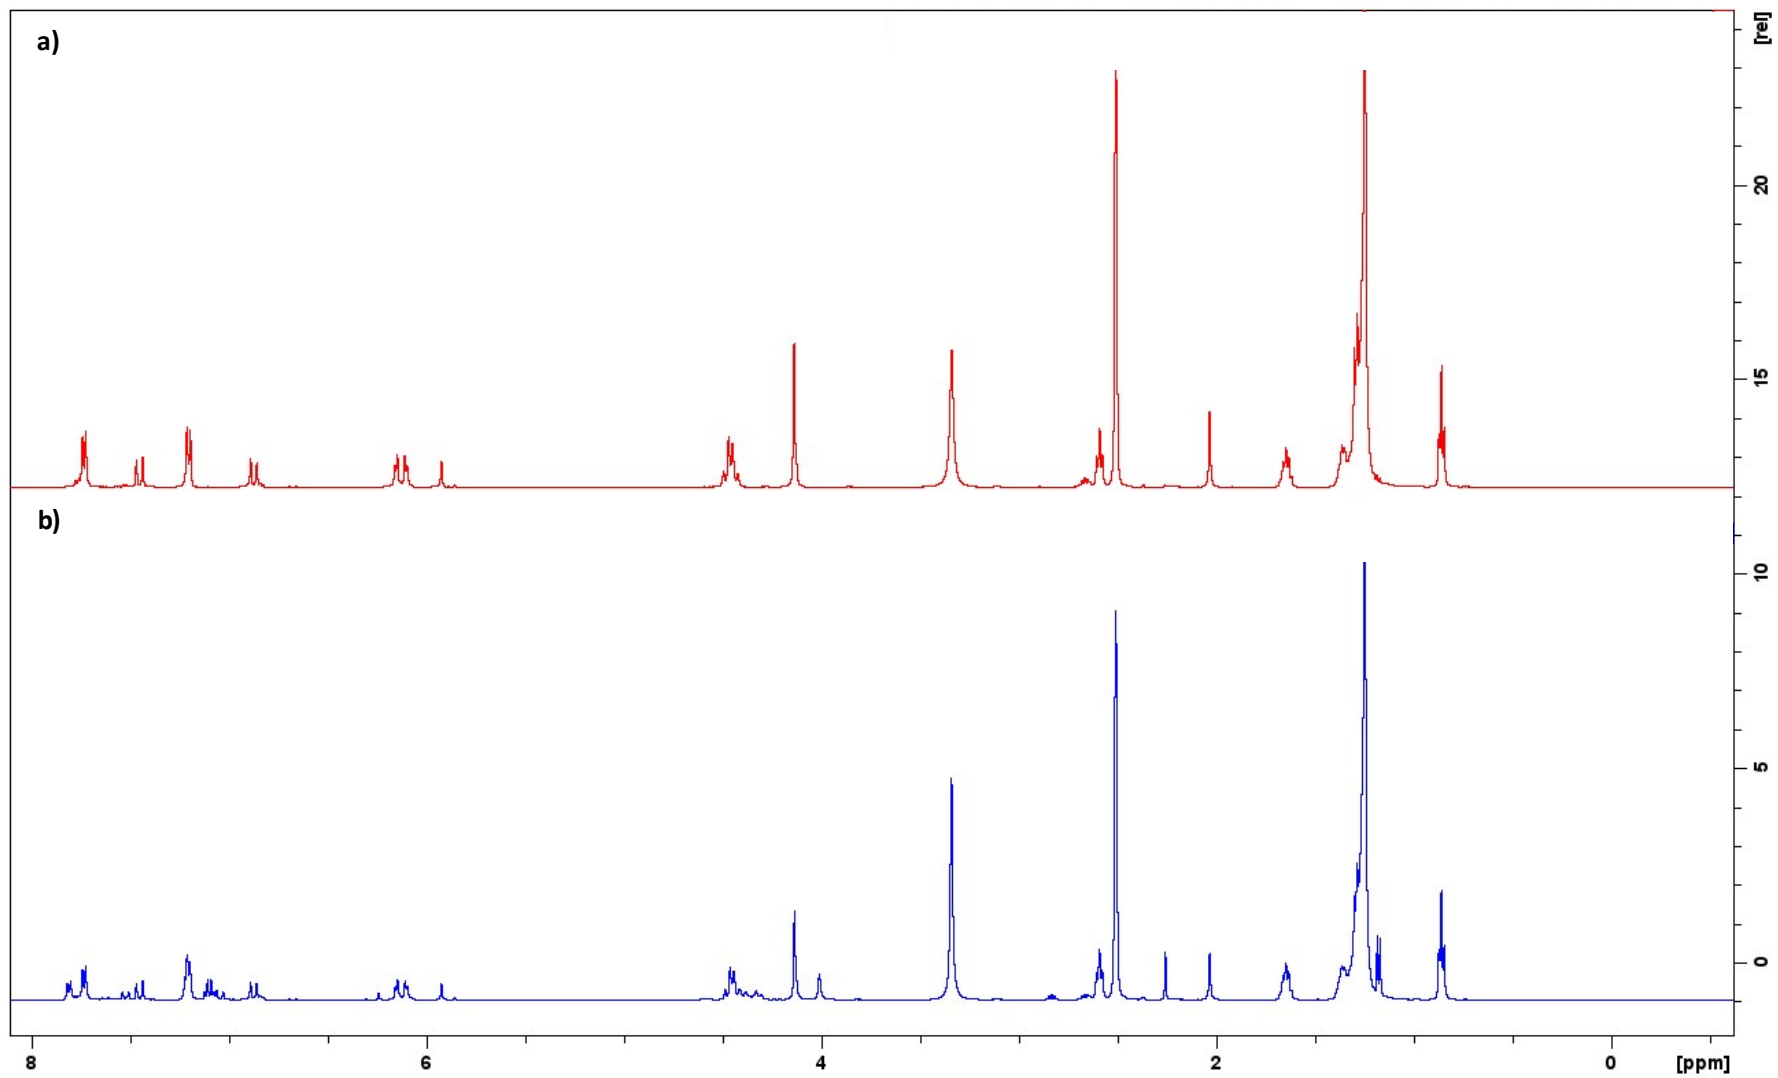

**Figure S29 (c).** Comparison of <sup>1</sup>H-NMR spectra of complex **6** at t=0 (a) and after 5 days (b)

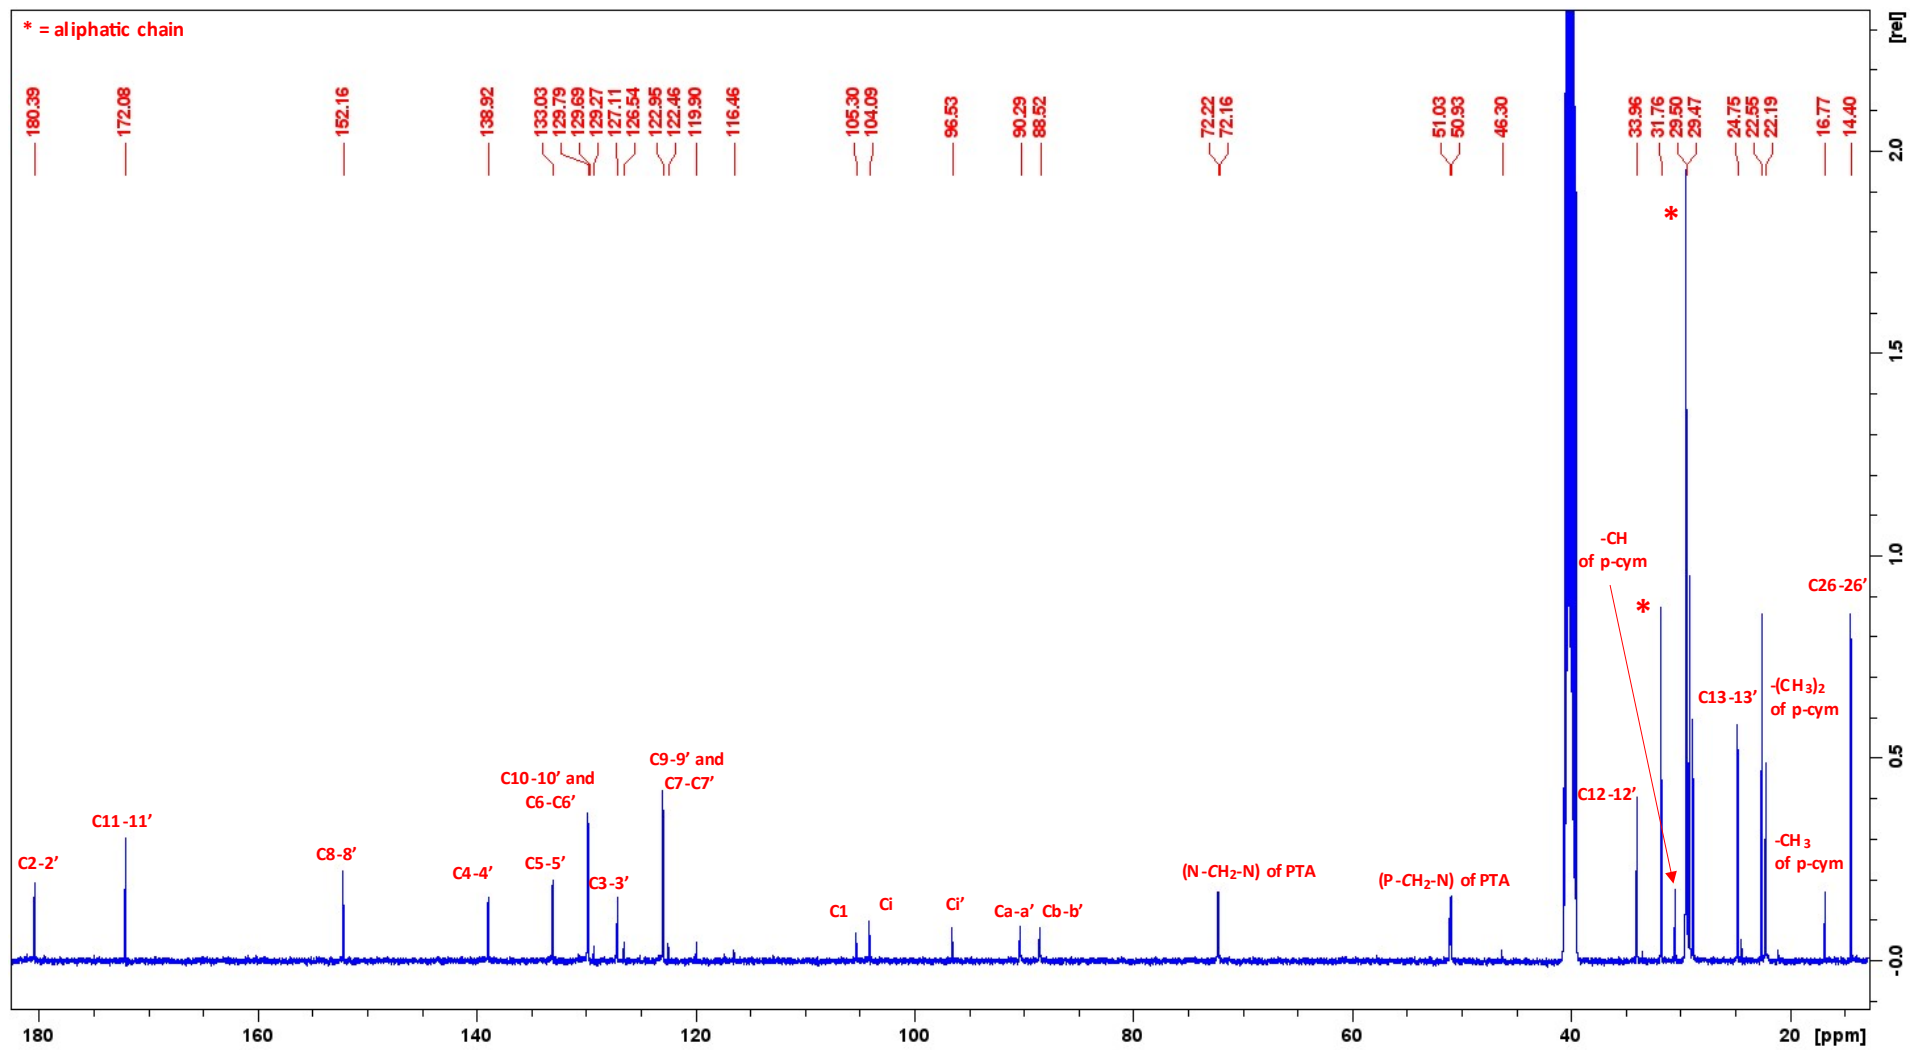

Figure S30. <sup>13</sup>C-NMR of **6** in DMSO at 293 K

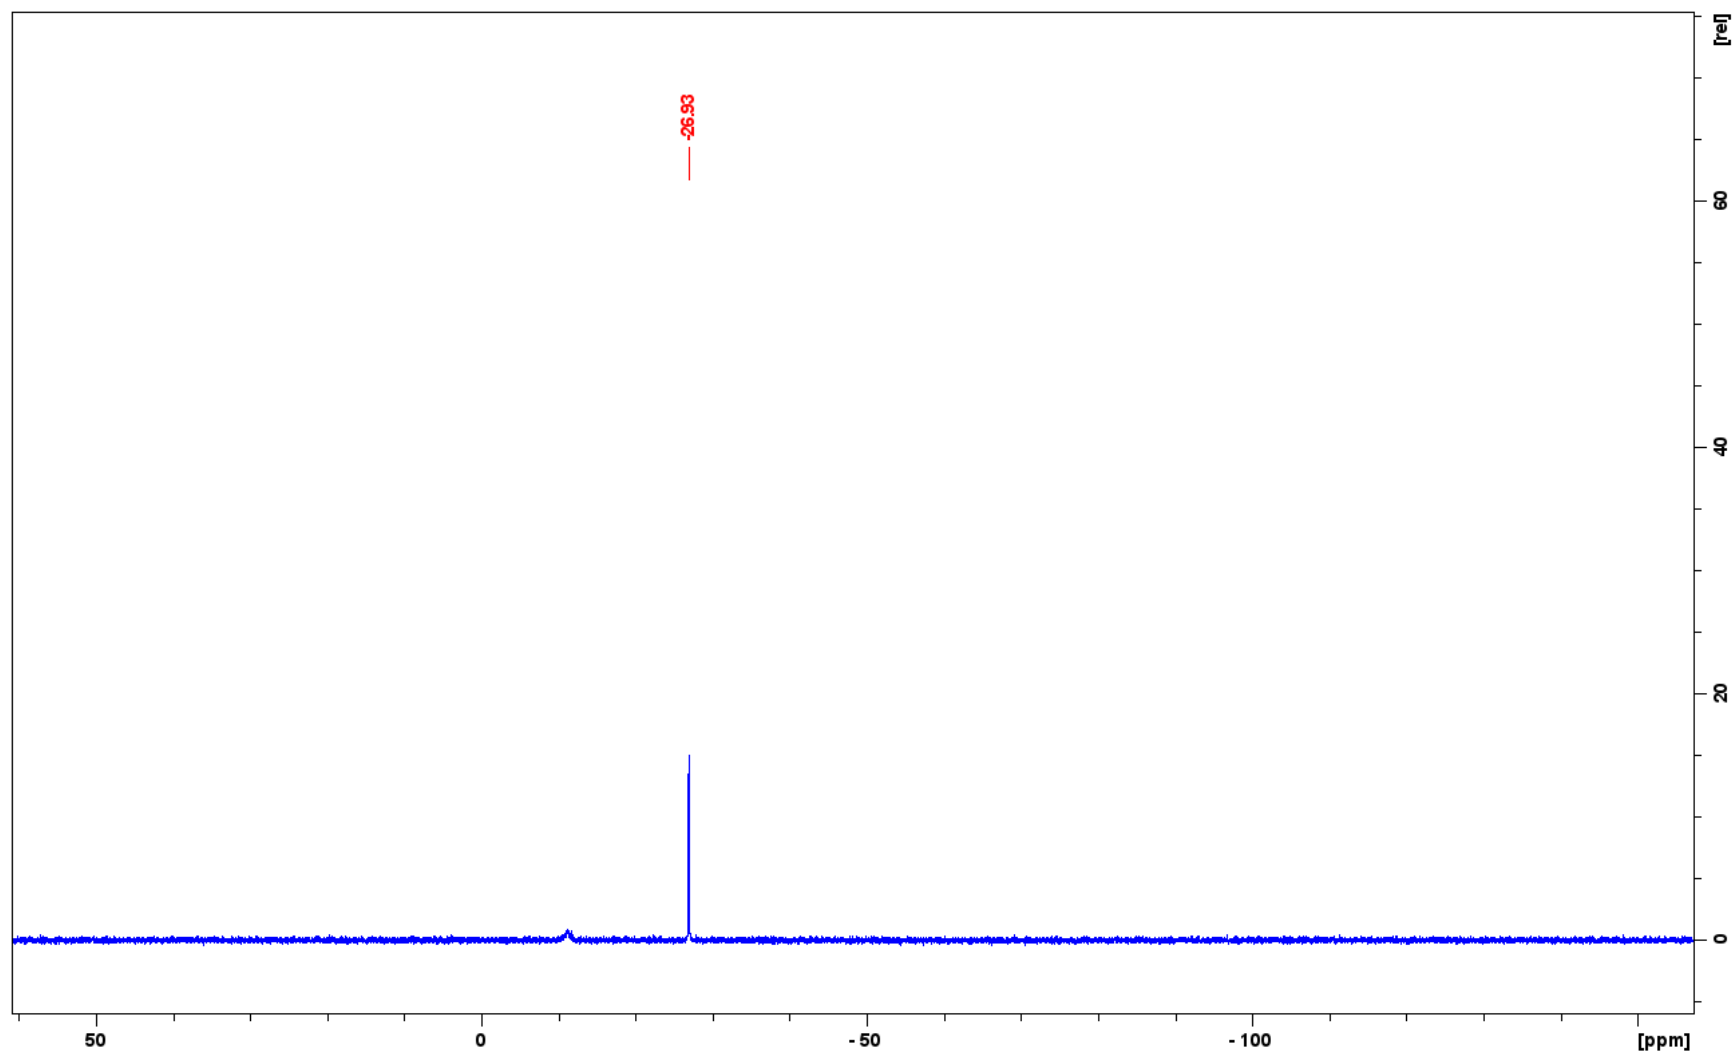

**Figure S31.**  $^{31}\text{P}$ -NMR of **6** in DMSO at 293 K

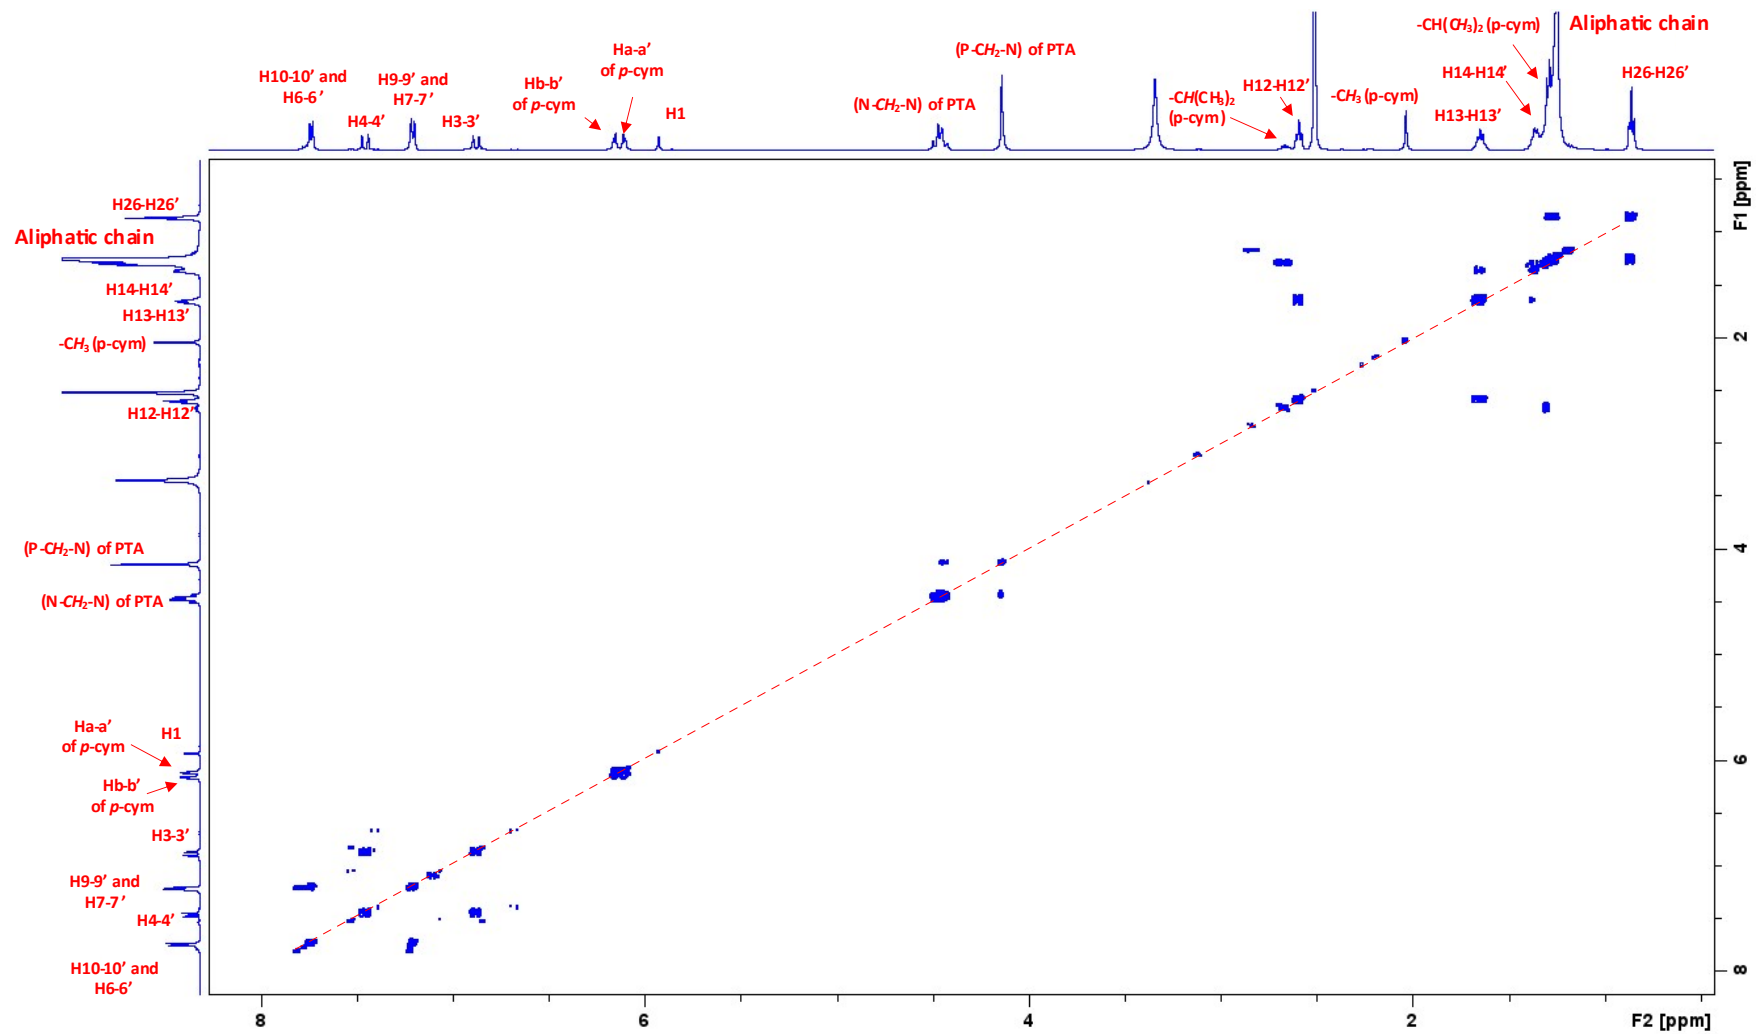

Figure S32.  $\{^1\text{H}-^1\text{H}\}$ - COSY NMR of **6** in DMSO at 293 K

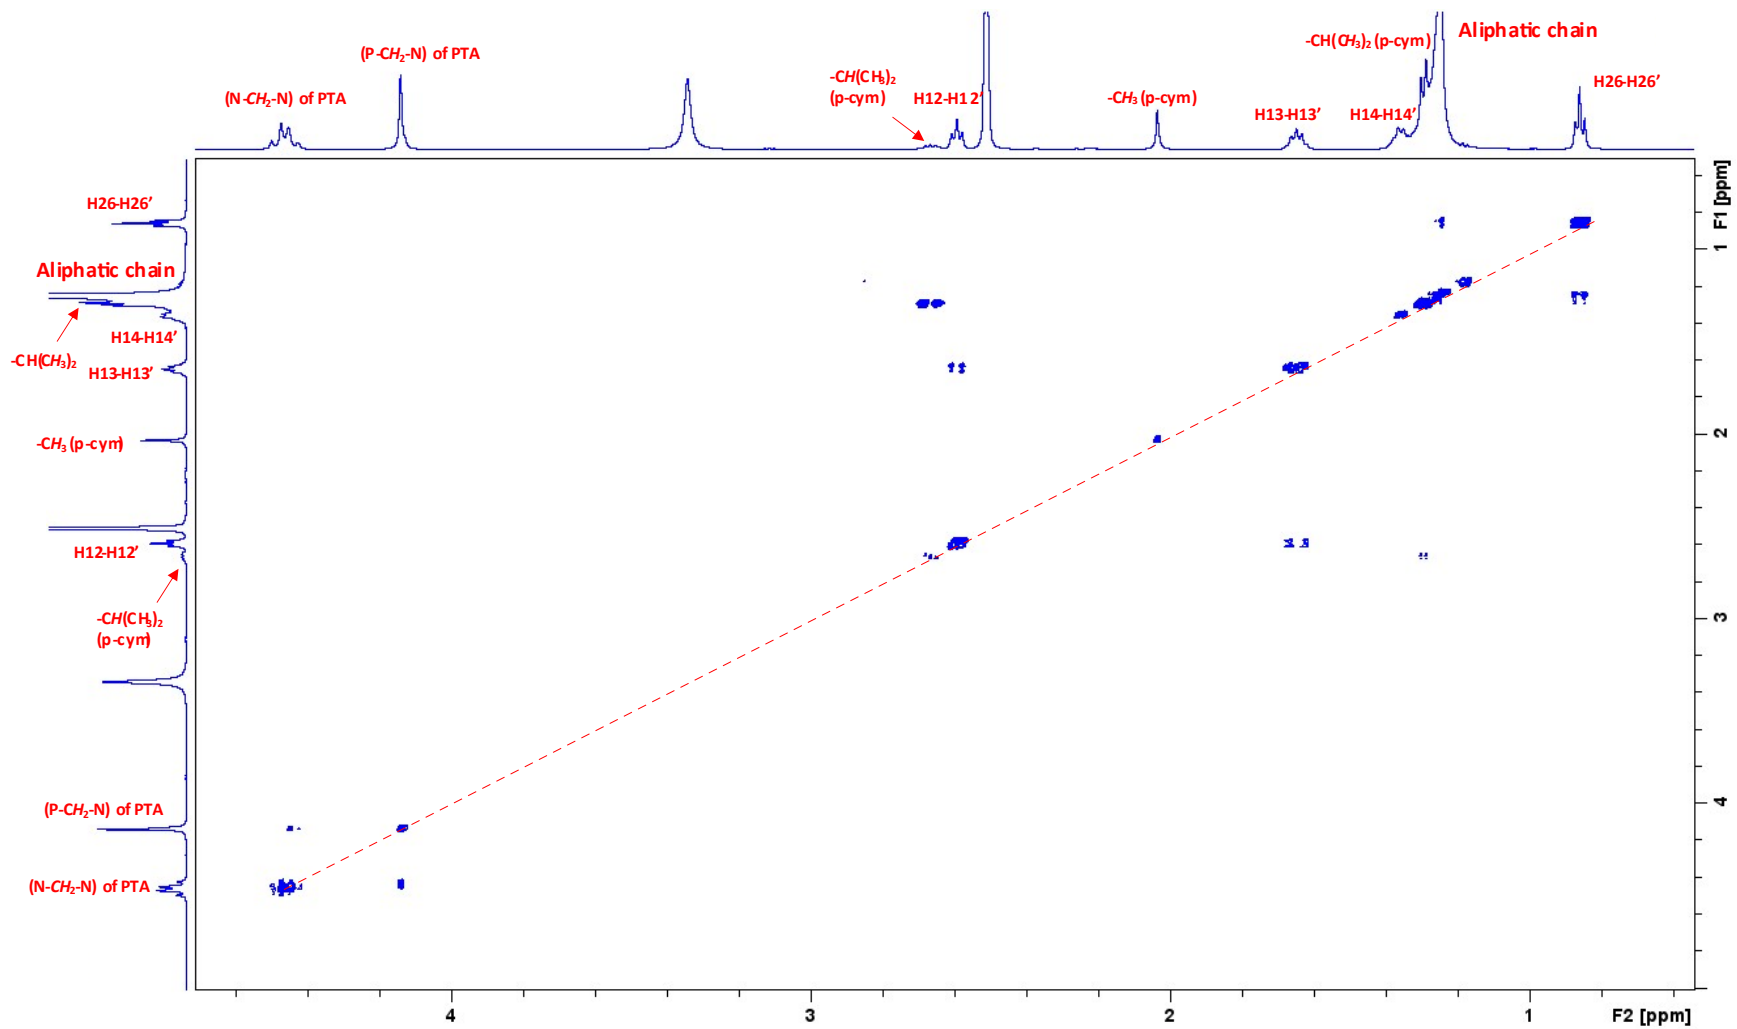

Figure S32 (a). Magnification of  $\{^1\text{H}-^1\text{H}\}$ - COSY NMR

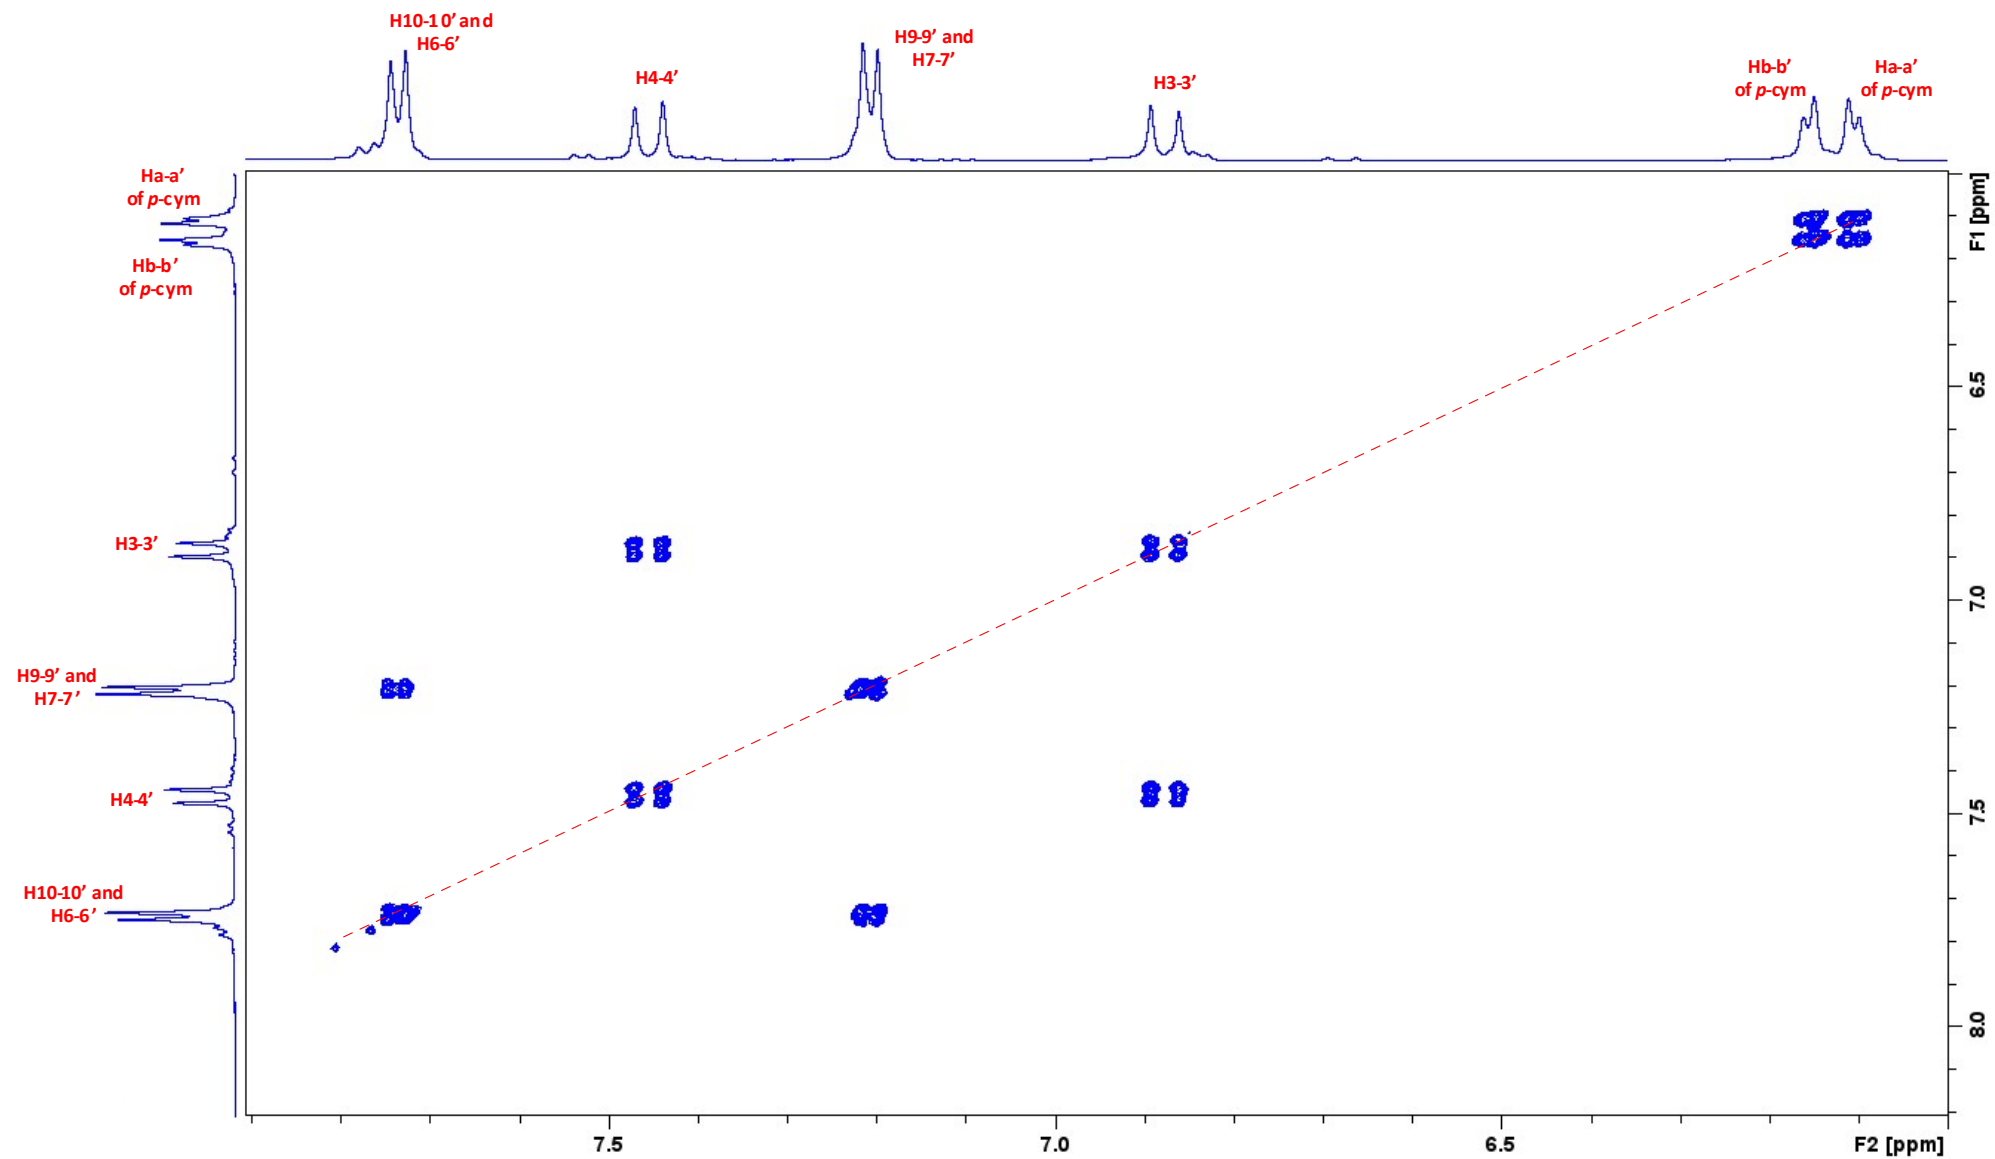

Figure S32 (b). Magnification of  $\{^1\text{H}-^1\text{H}\}$ - COSY NMR

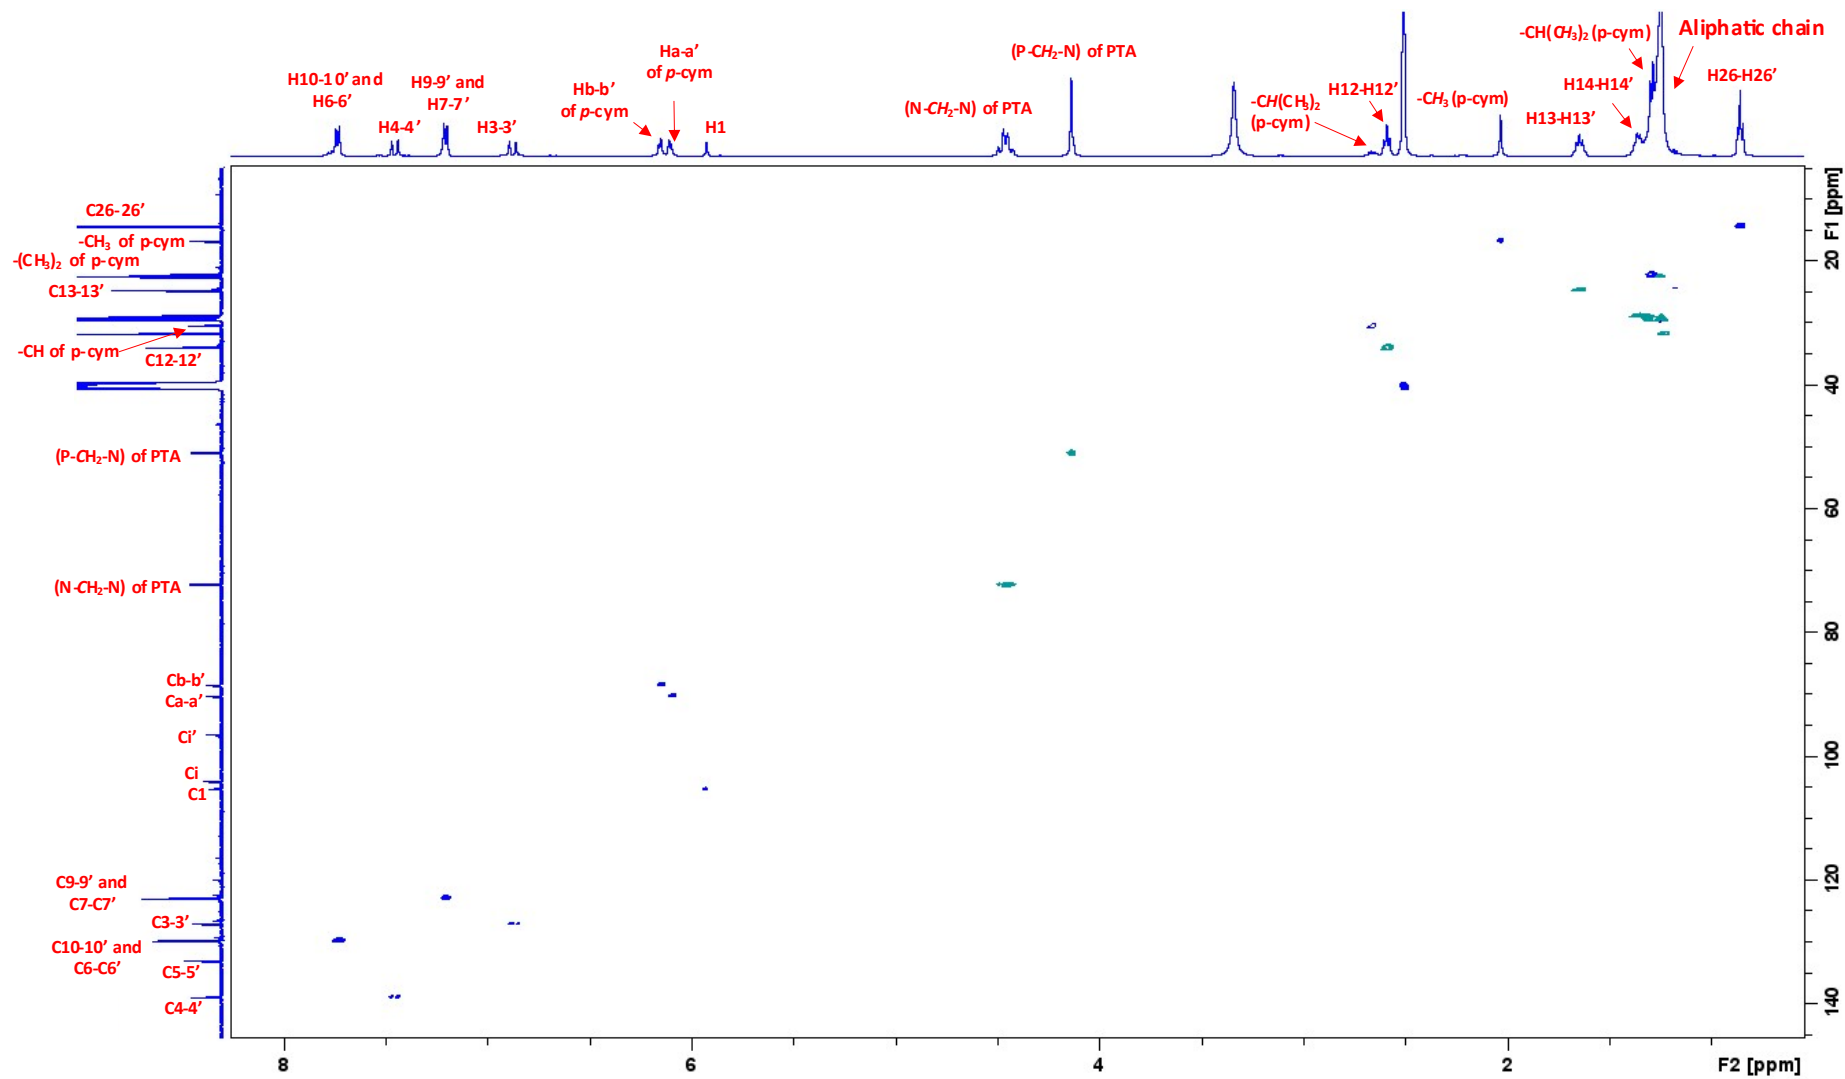

**Figure S33.**  $\{^1\text{H}-^{13}\text{C}\}$ -HSQC NMR of **6** in DMSO at 293 K

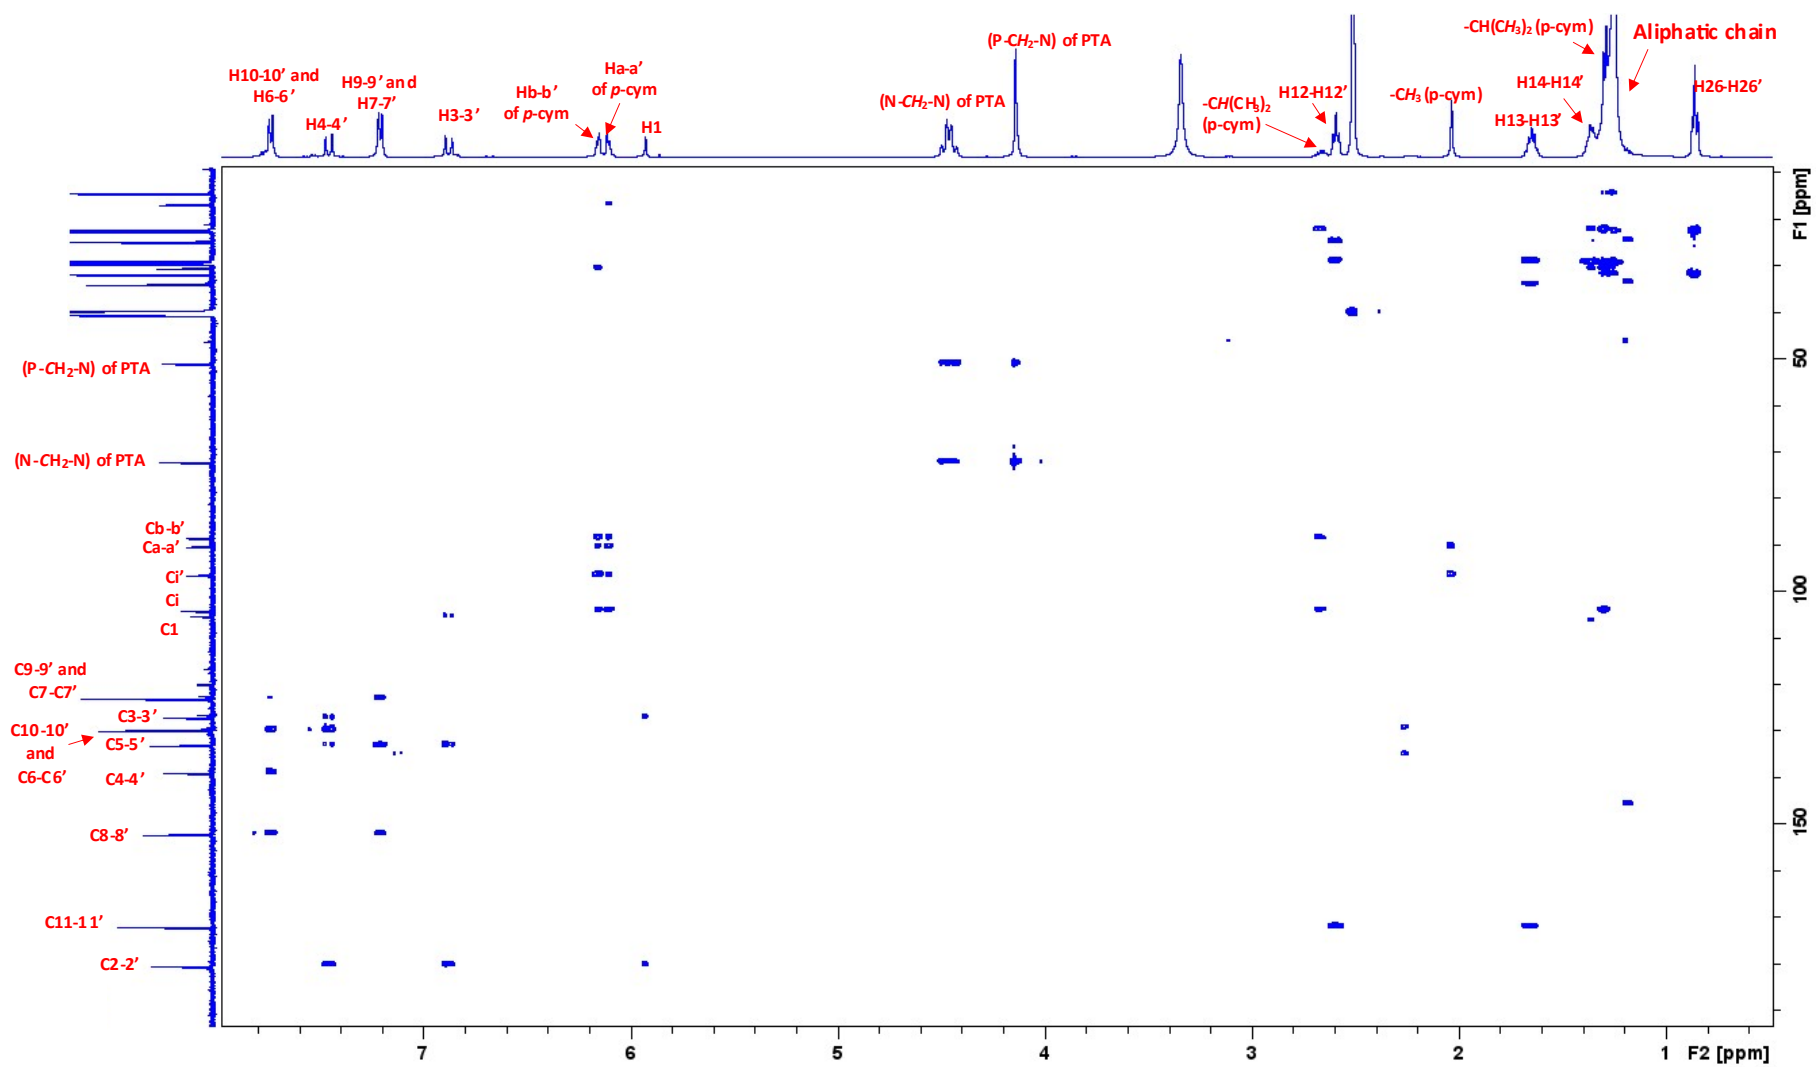

Figure S34.  $\{^1\text{H}-^{13}\text{C}\}$ -HMBC NMR of **6** in DMSO at 293 K



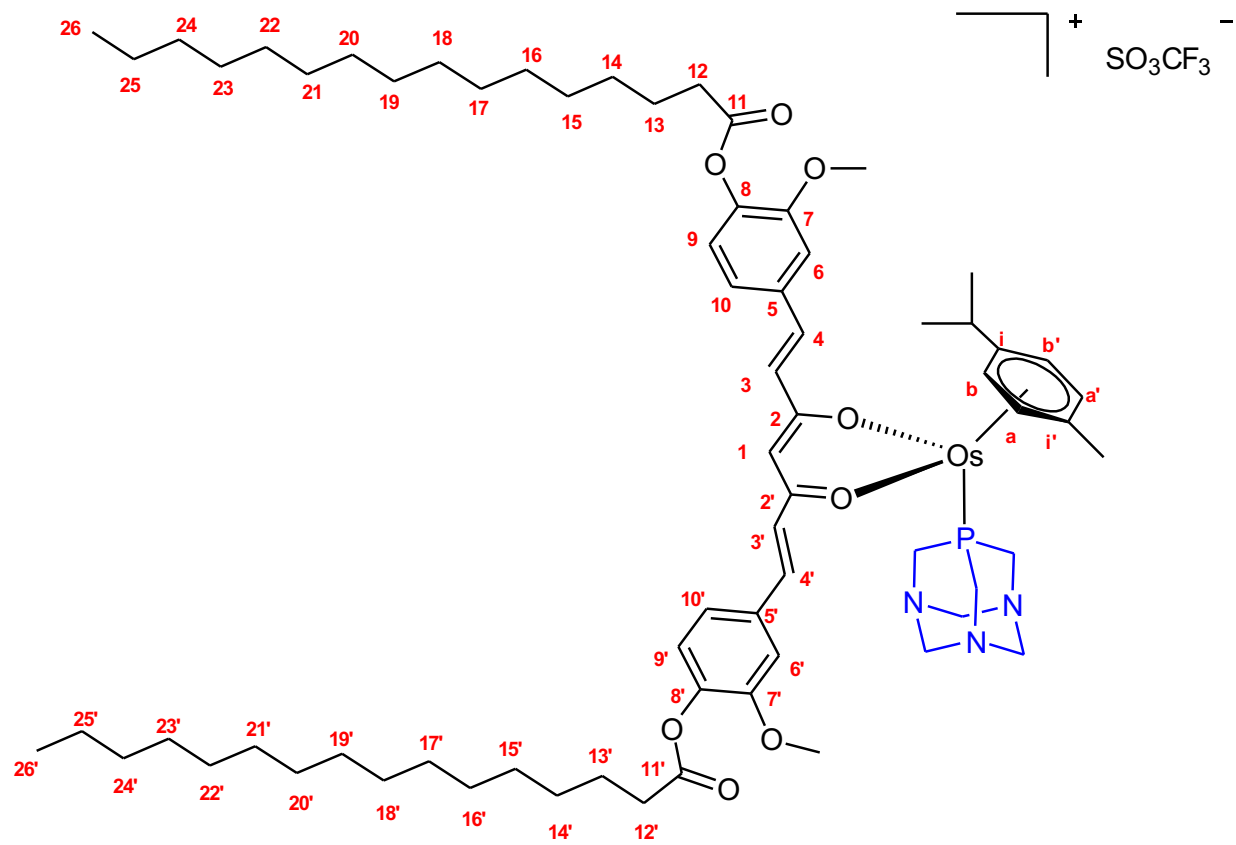

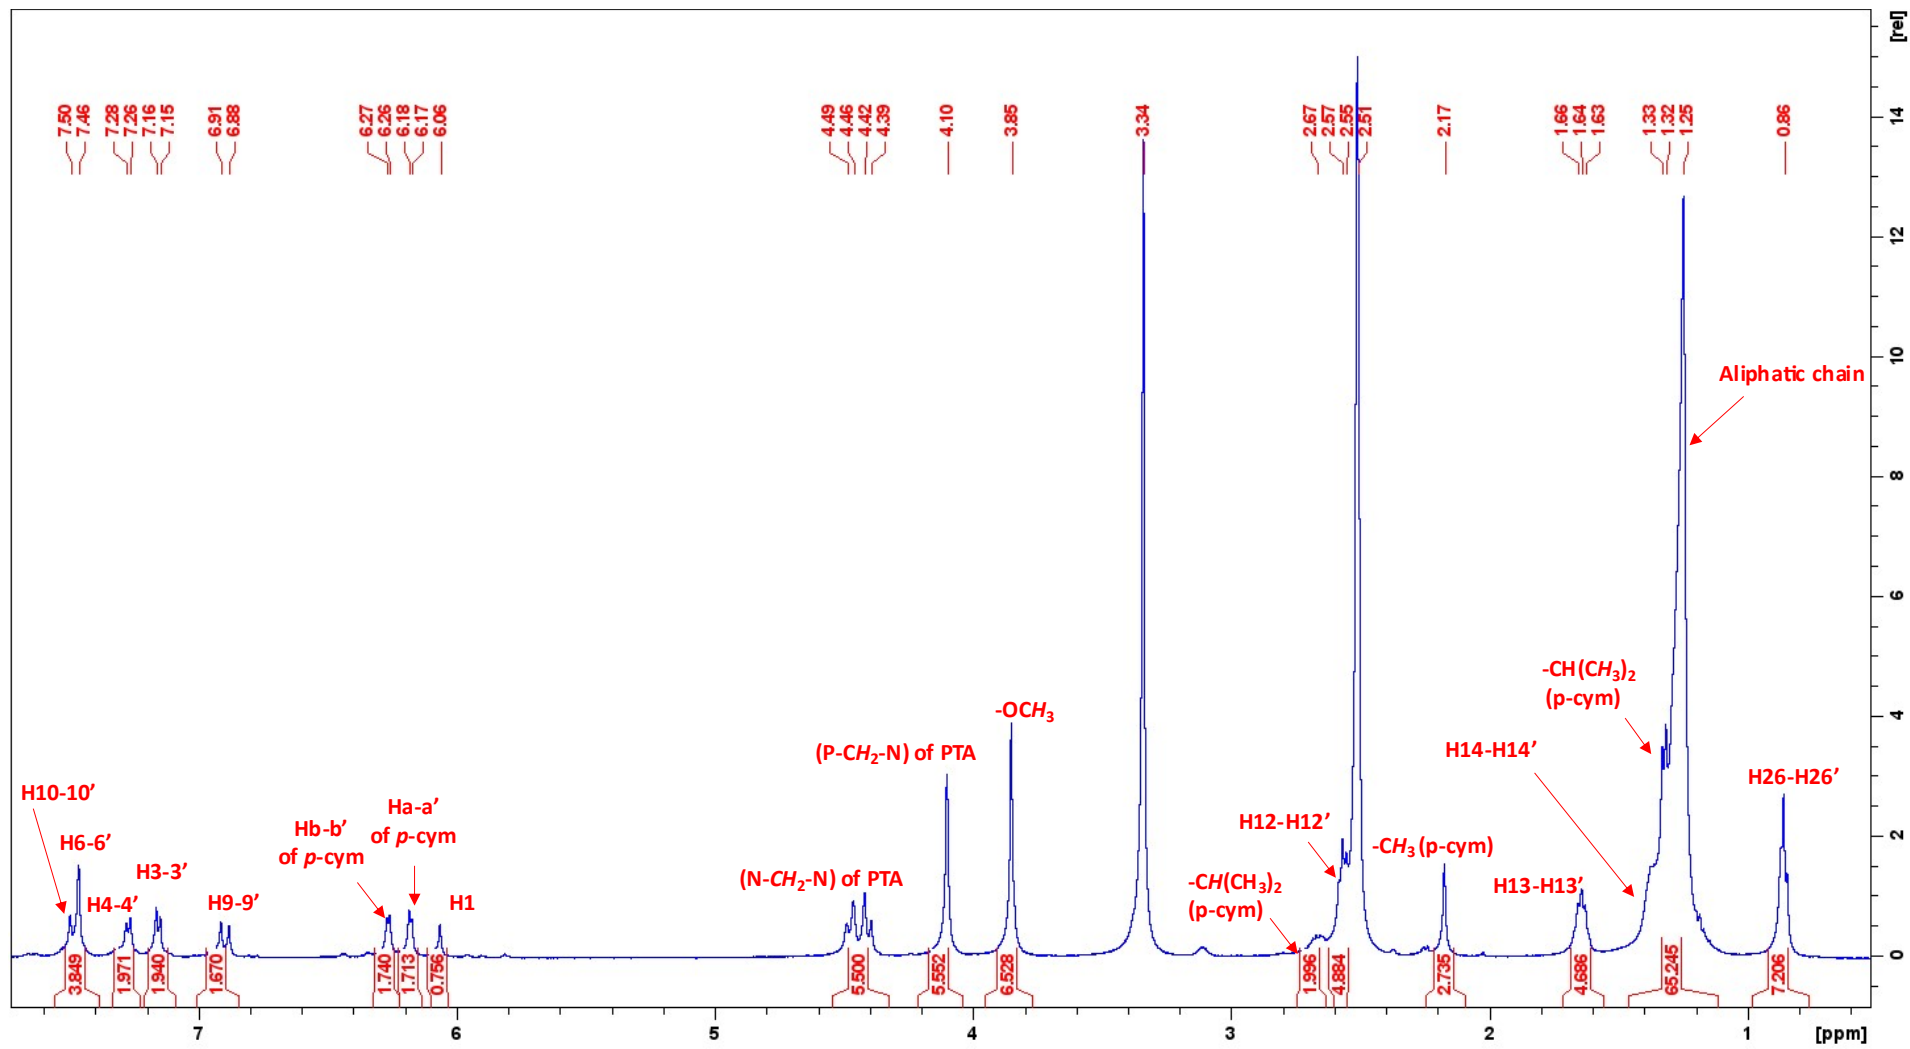

Figure S35. <sup>1</sup>H-NMR of 7 in DMSO at 293 K

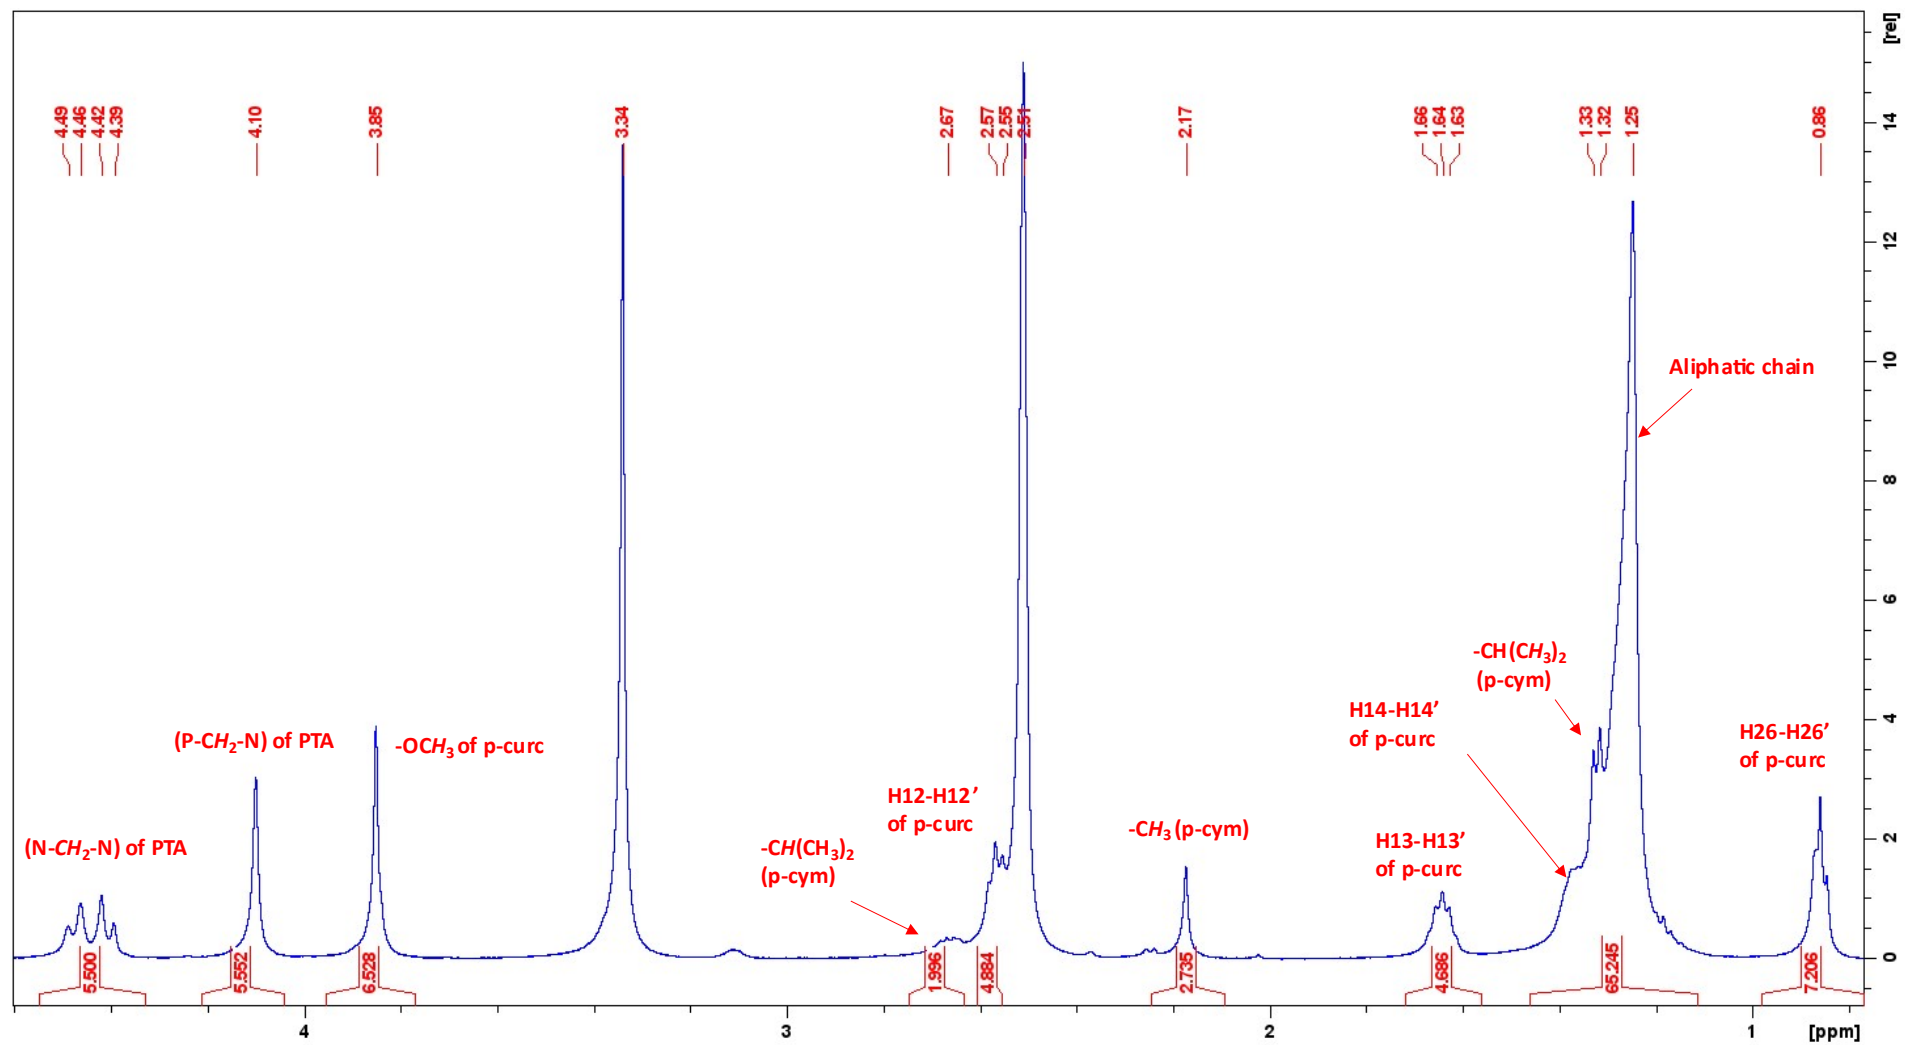

Figure S35 (a). Magnification of  $^1\text{H-NMR}$  (1-5 ppm)

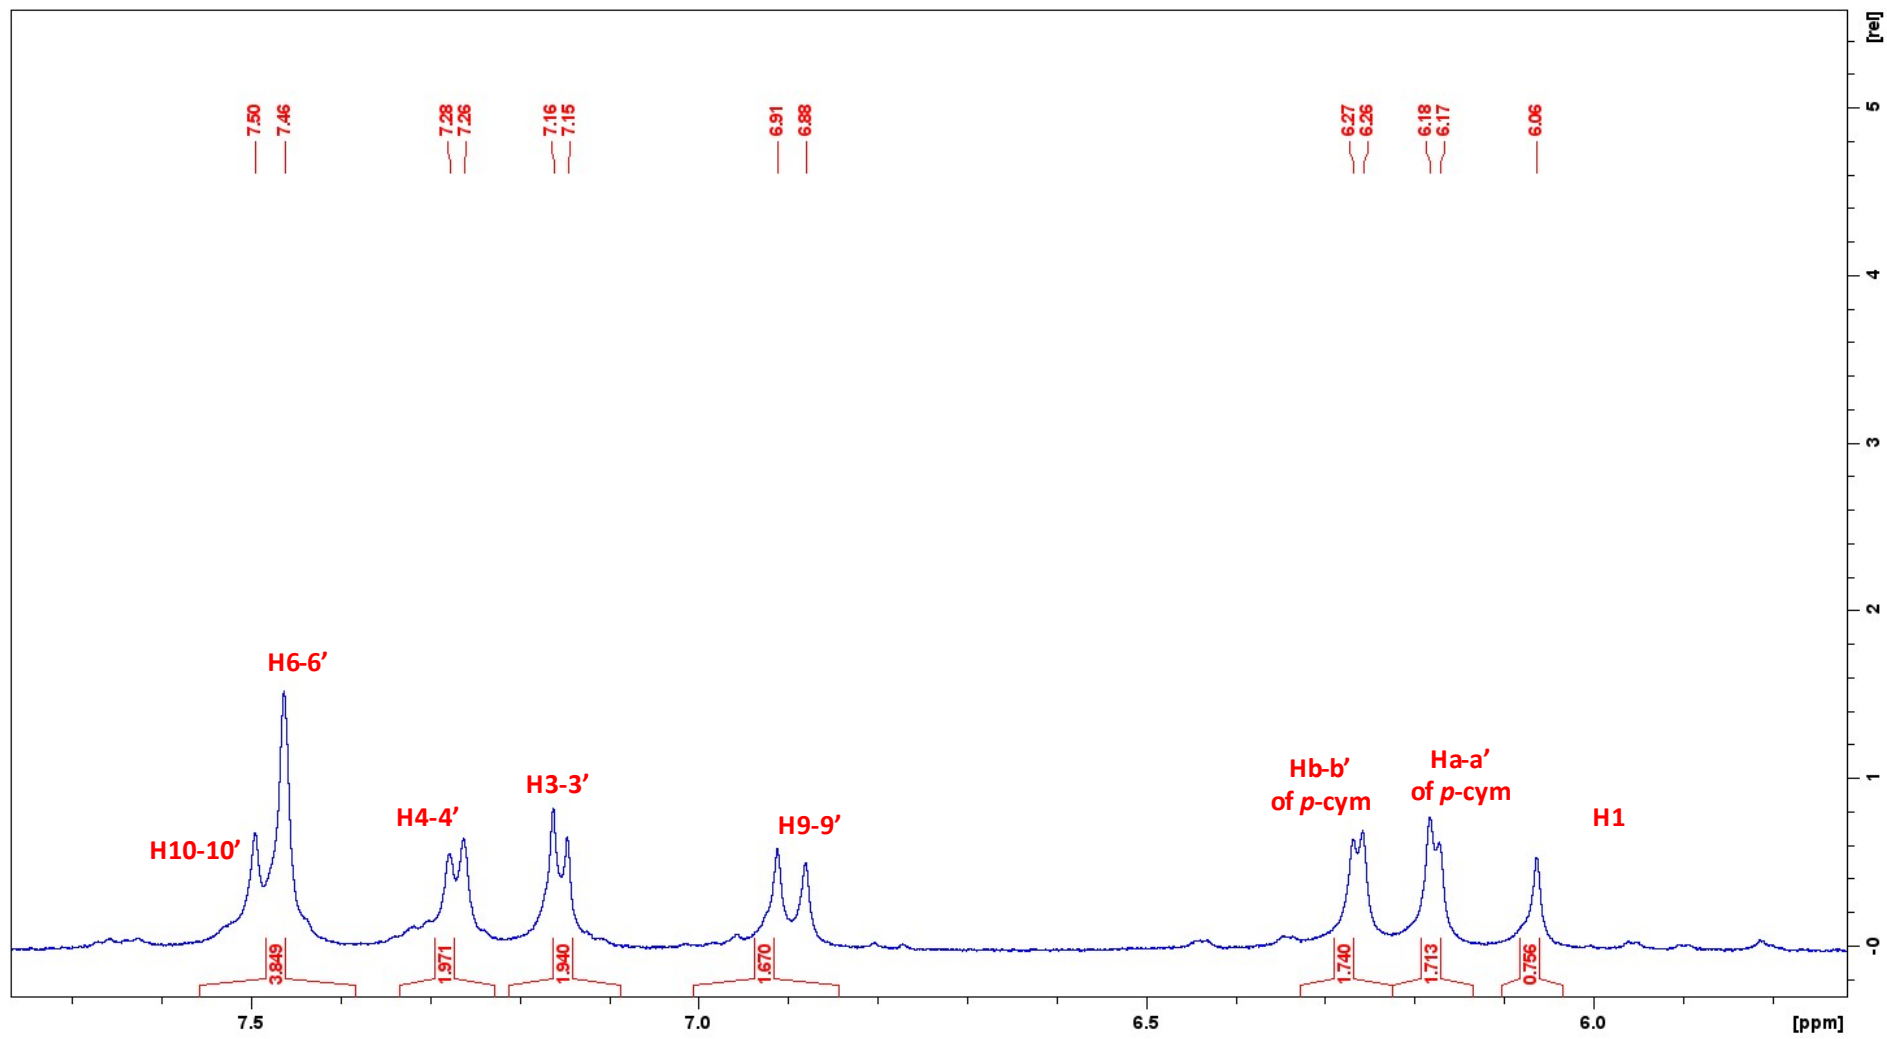

Figure S35 (b). Magnification of <sup>1</sup>H-NMR (5-8 ppm)

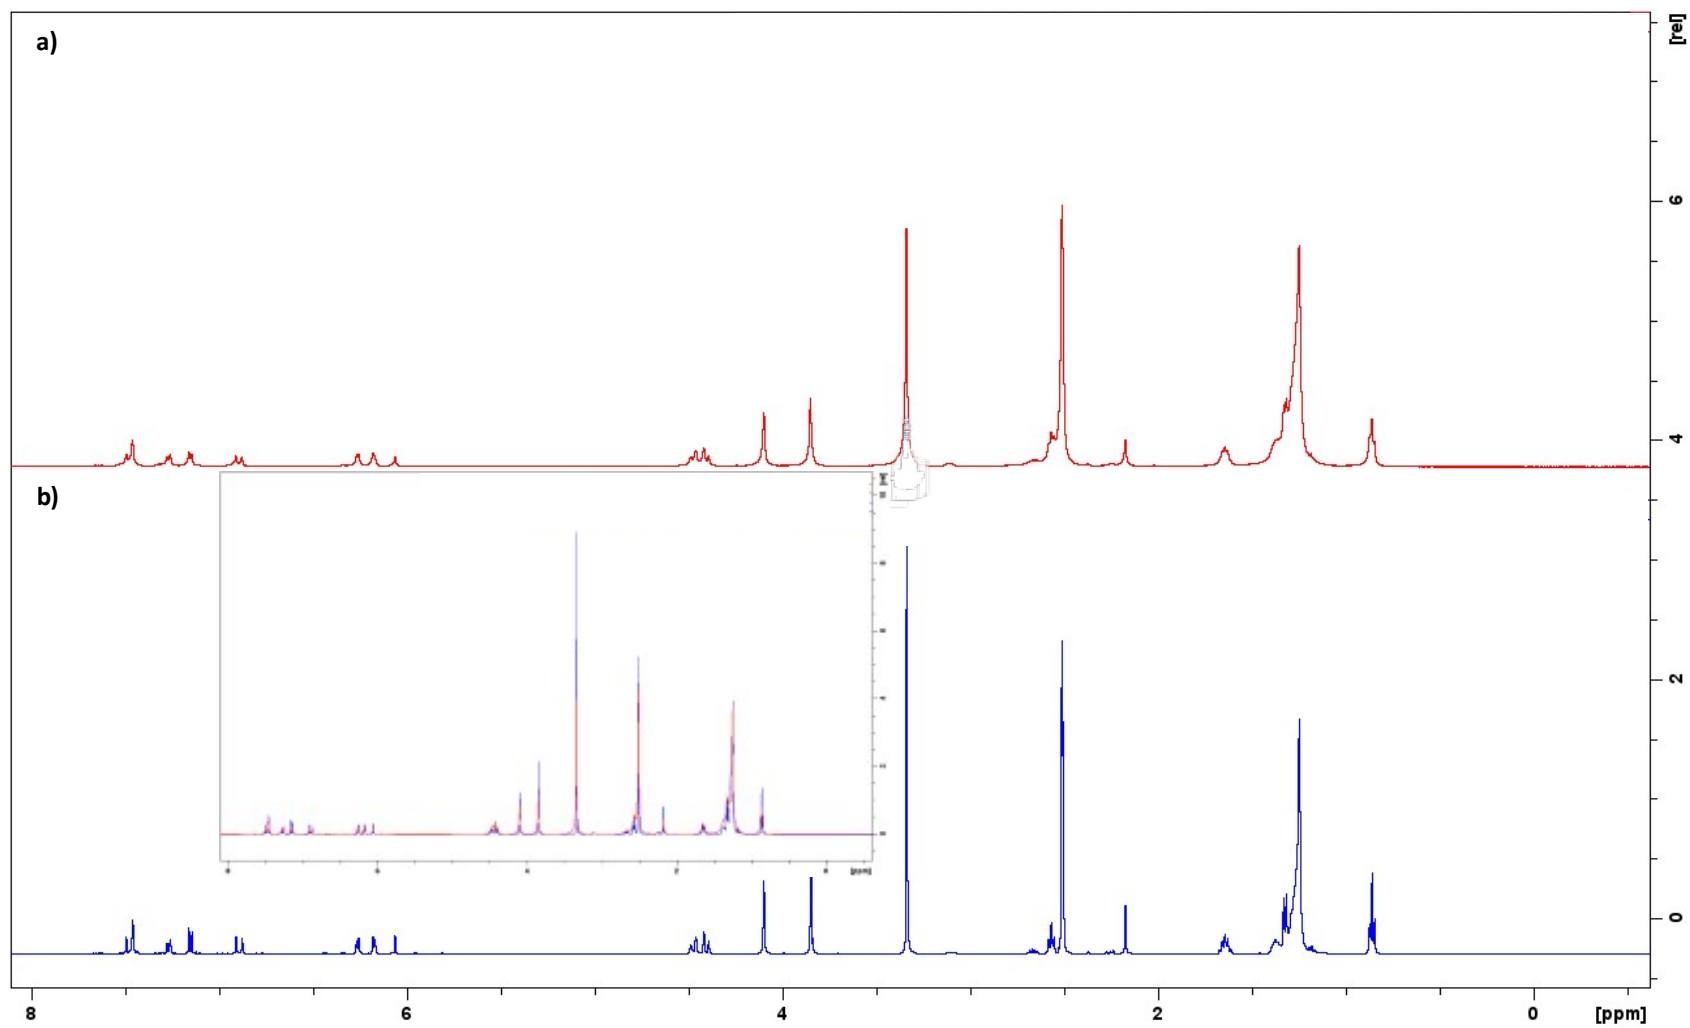

**Figure S35 (c).** Comparison of <sup>1</sup>H-NMR spectra of complex **7** at t=0 (a) and after 5 days (b)

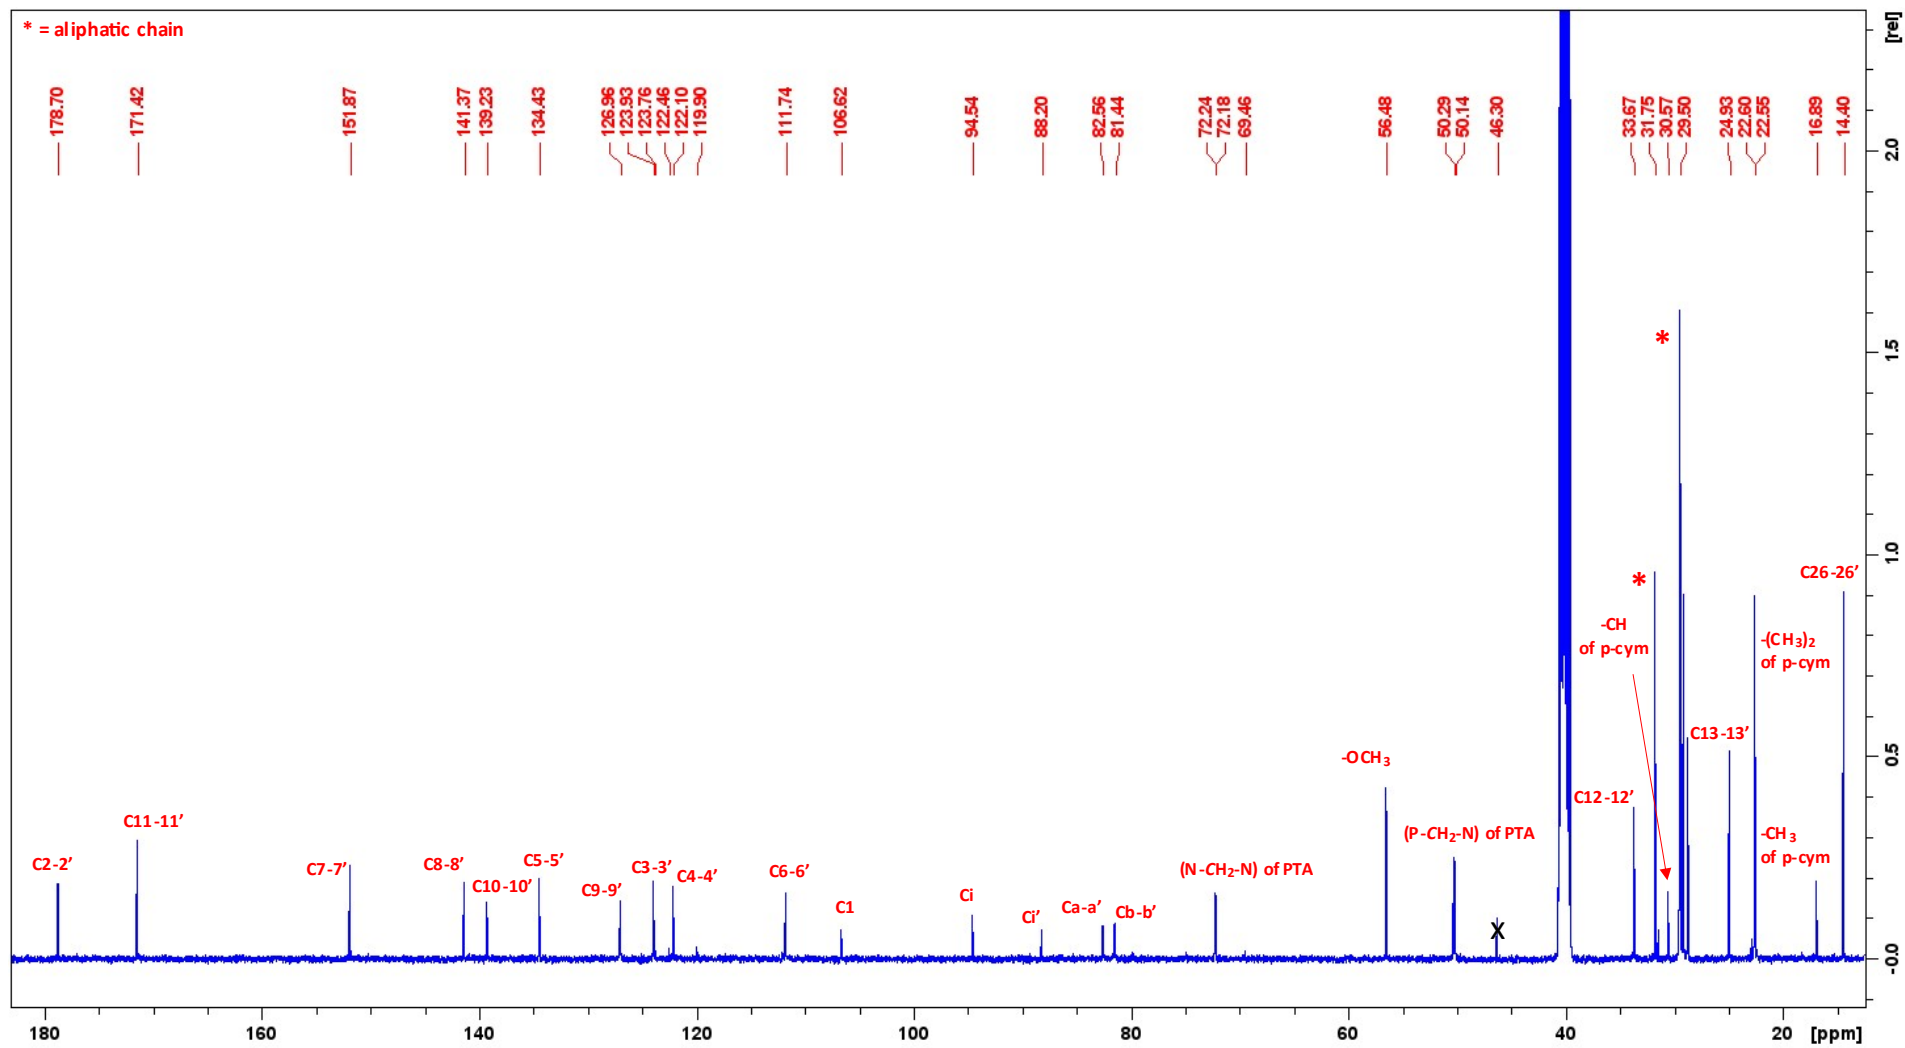

Figure S36. <sup>13</sup>C-NMR of 7 in DMSO at 293 K

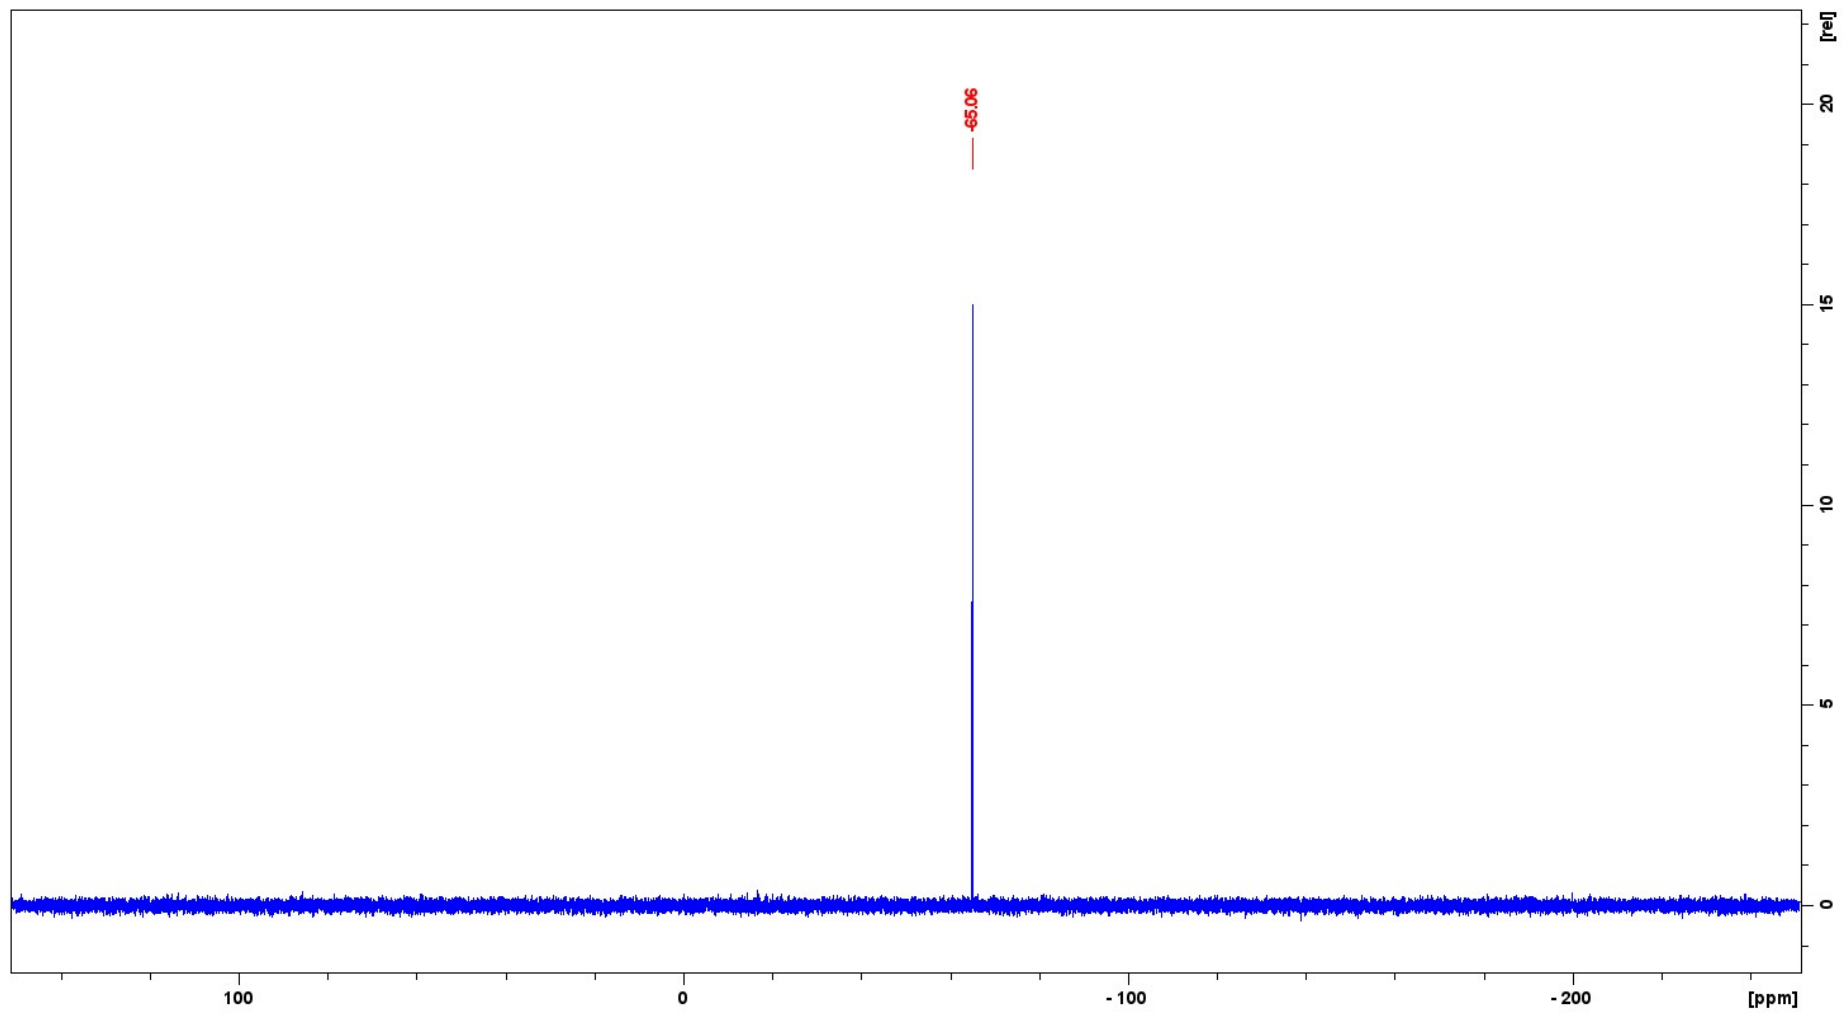

**Figure S37.**  $^{31}\text{P}$ -NMR of **7** in DMSO at 293 K

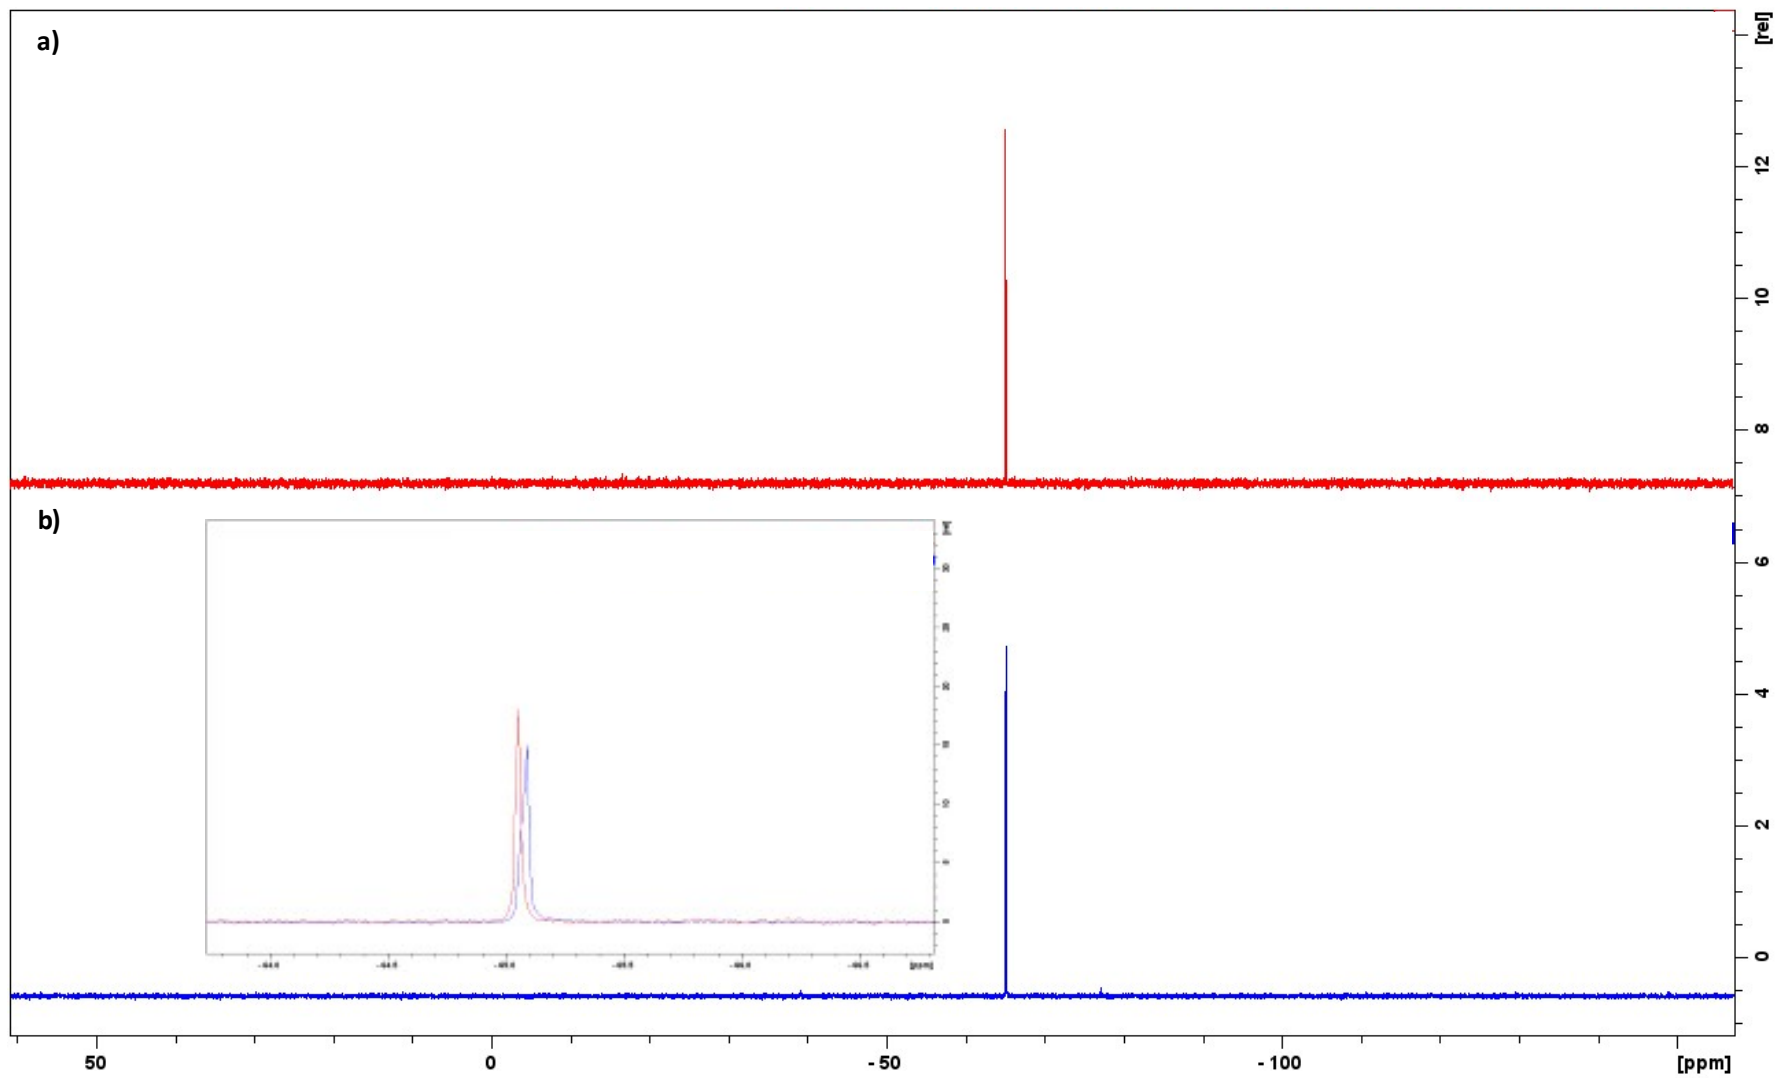

**Figure S37 (a).** Comparison of  $^{31}\text{P}$ -NMR spectra of complex **7** at  $t=0$  (a) and after 5 days (b)



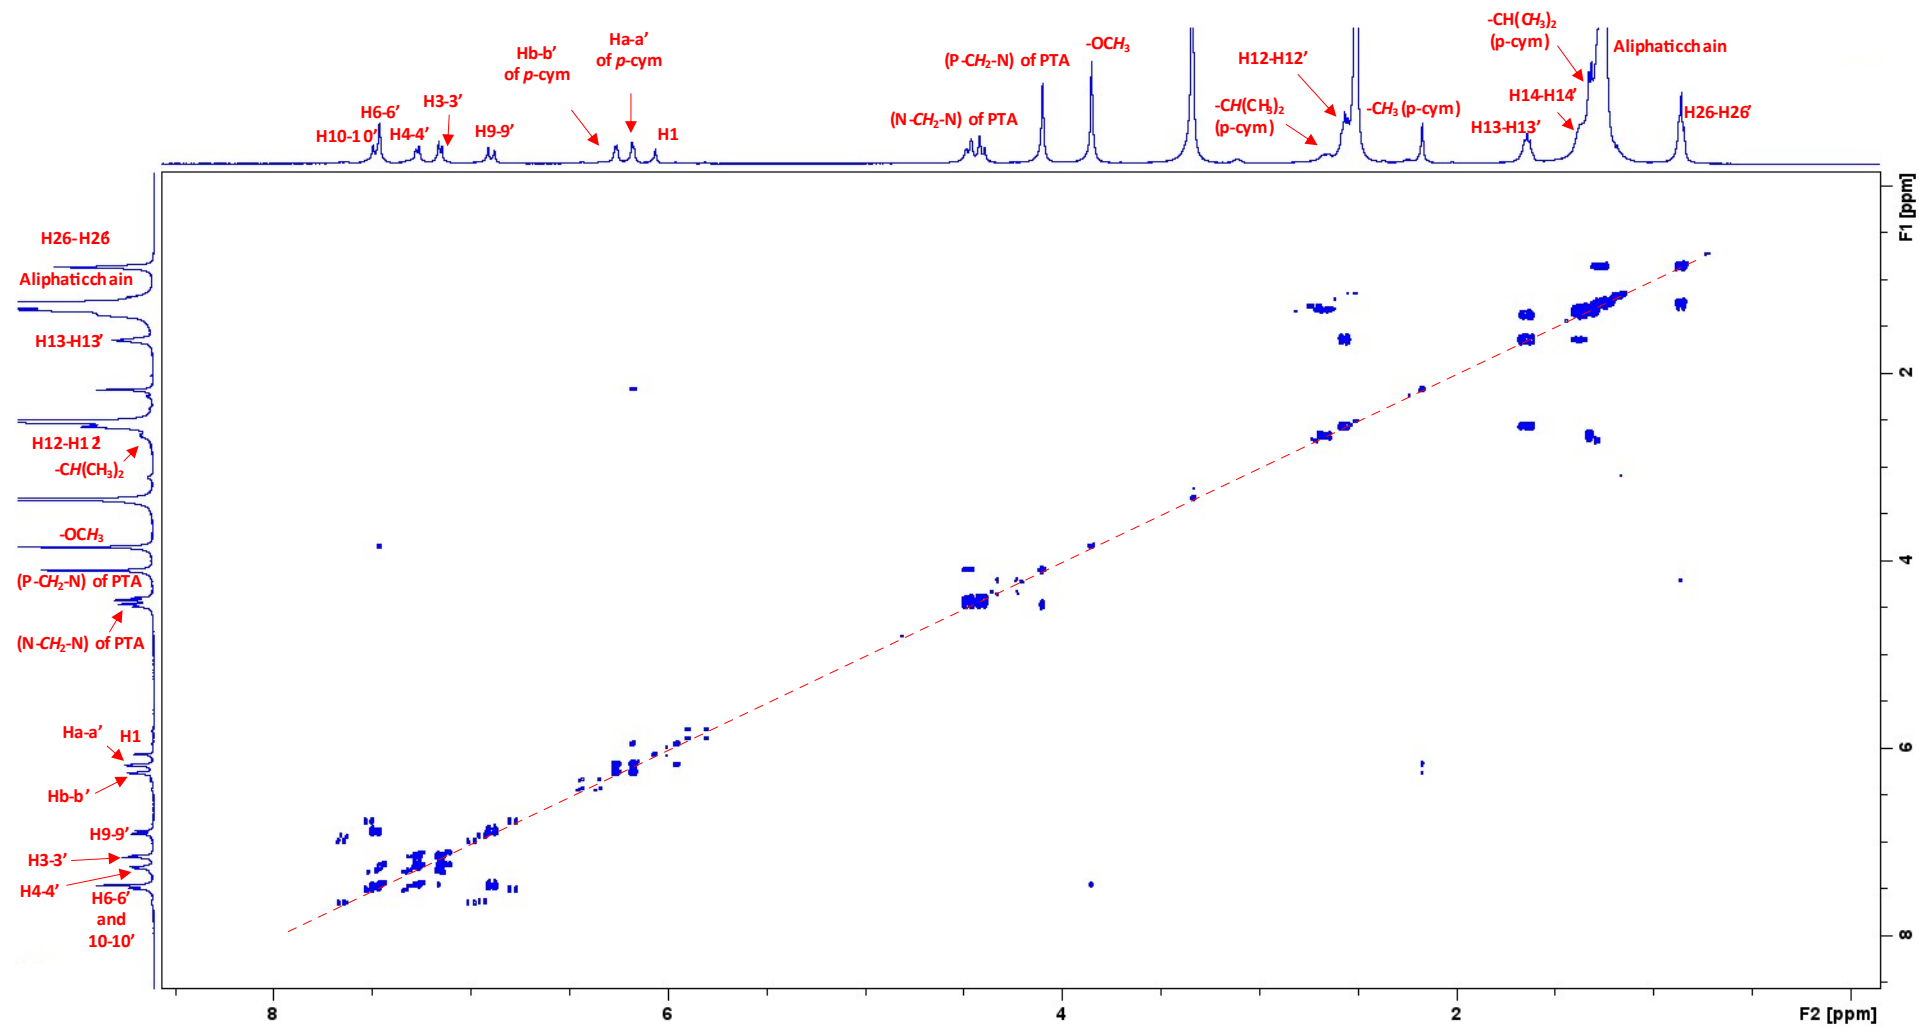

Figure S38.  $\{^1\text{H}-^1\text{H}\}$ - COSY NMR of 7 in DMSO at 293 K

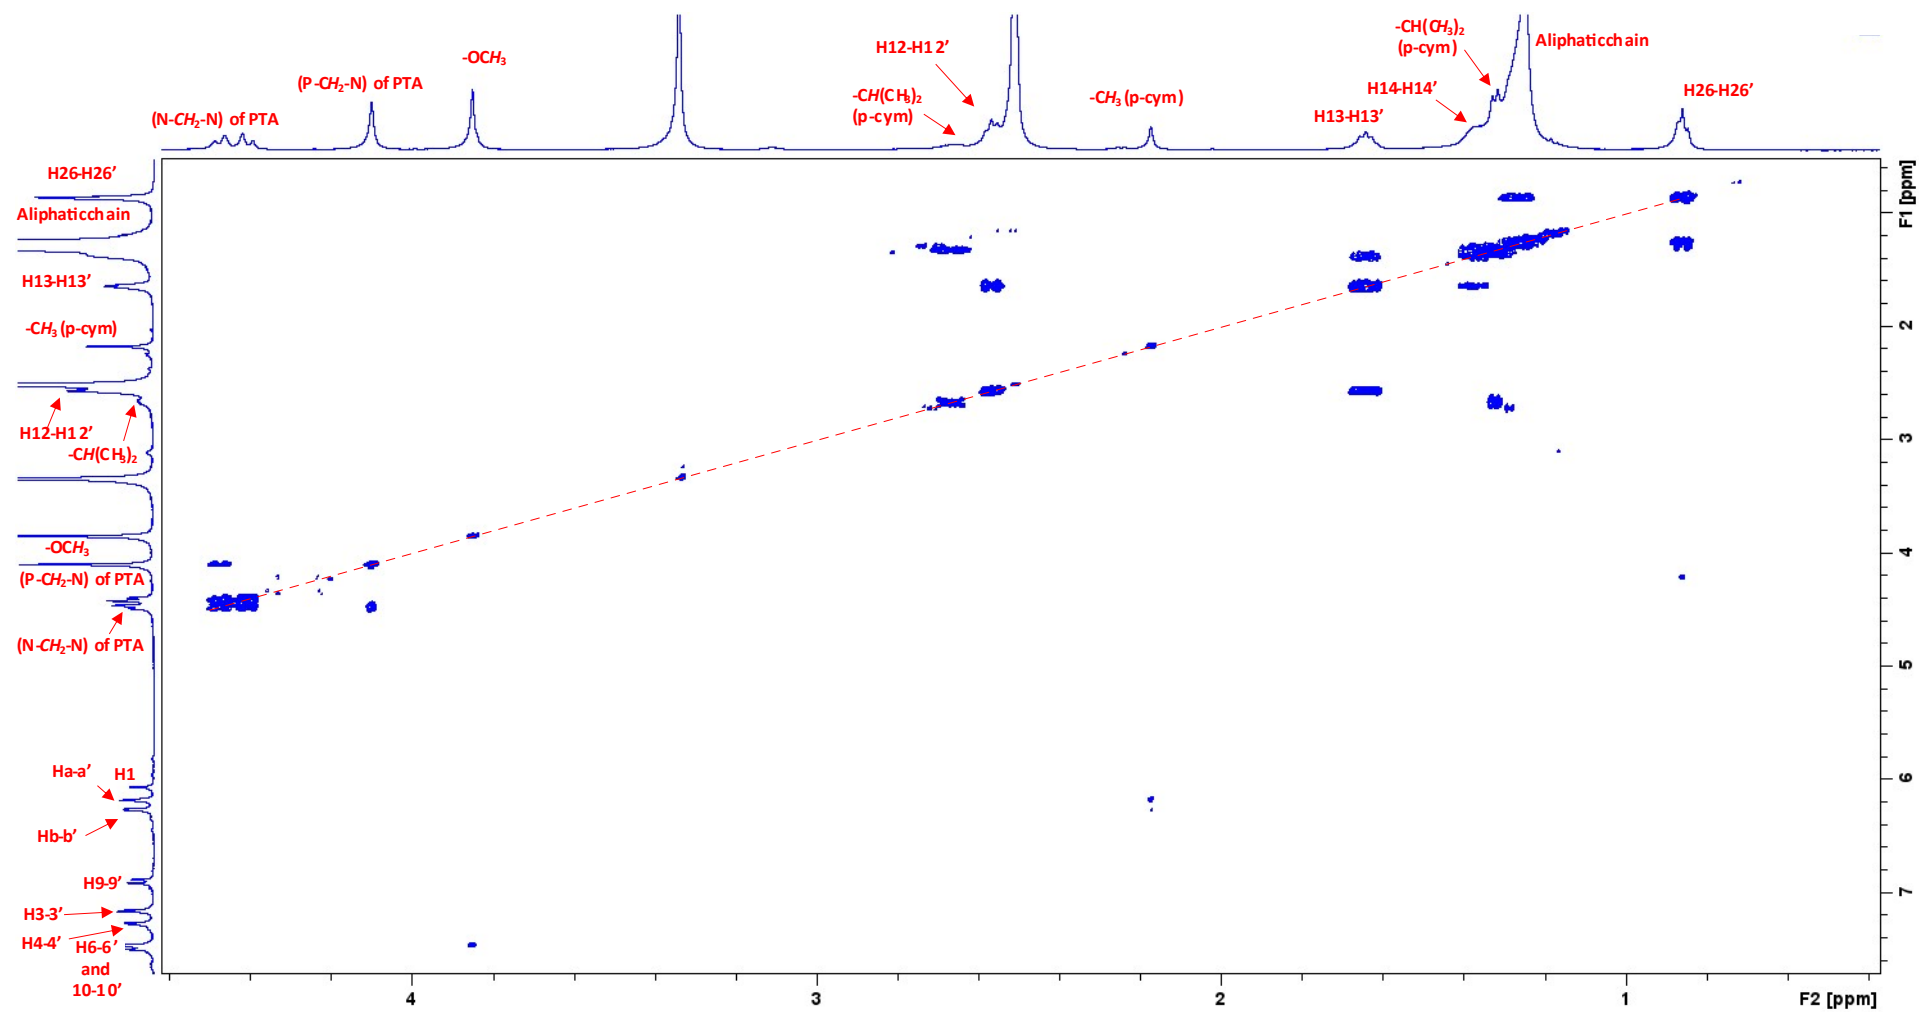

Figure S38 (a). Magnification of  $\{^1\text{H}-^1\text{H}\}$ - COSY NMR

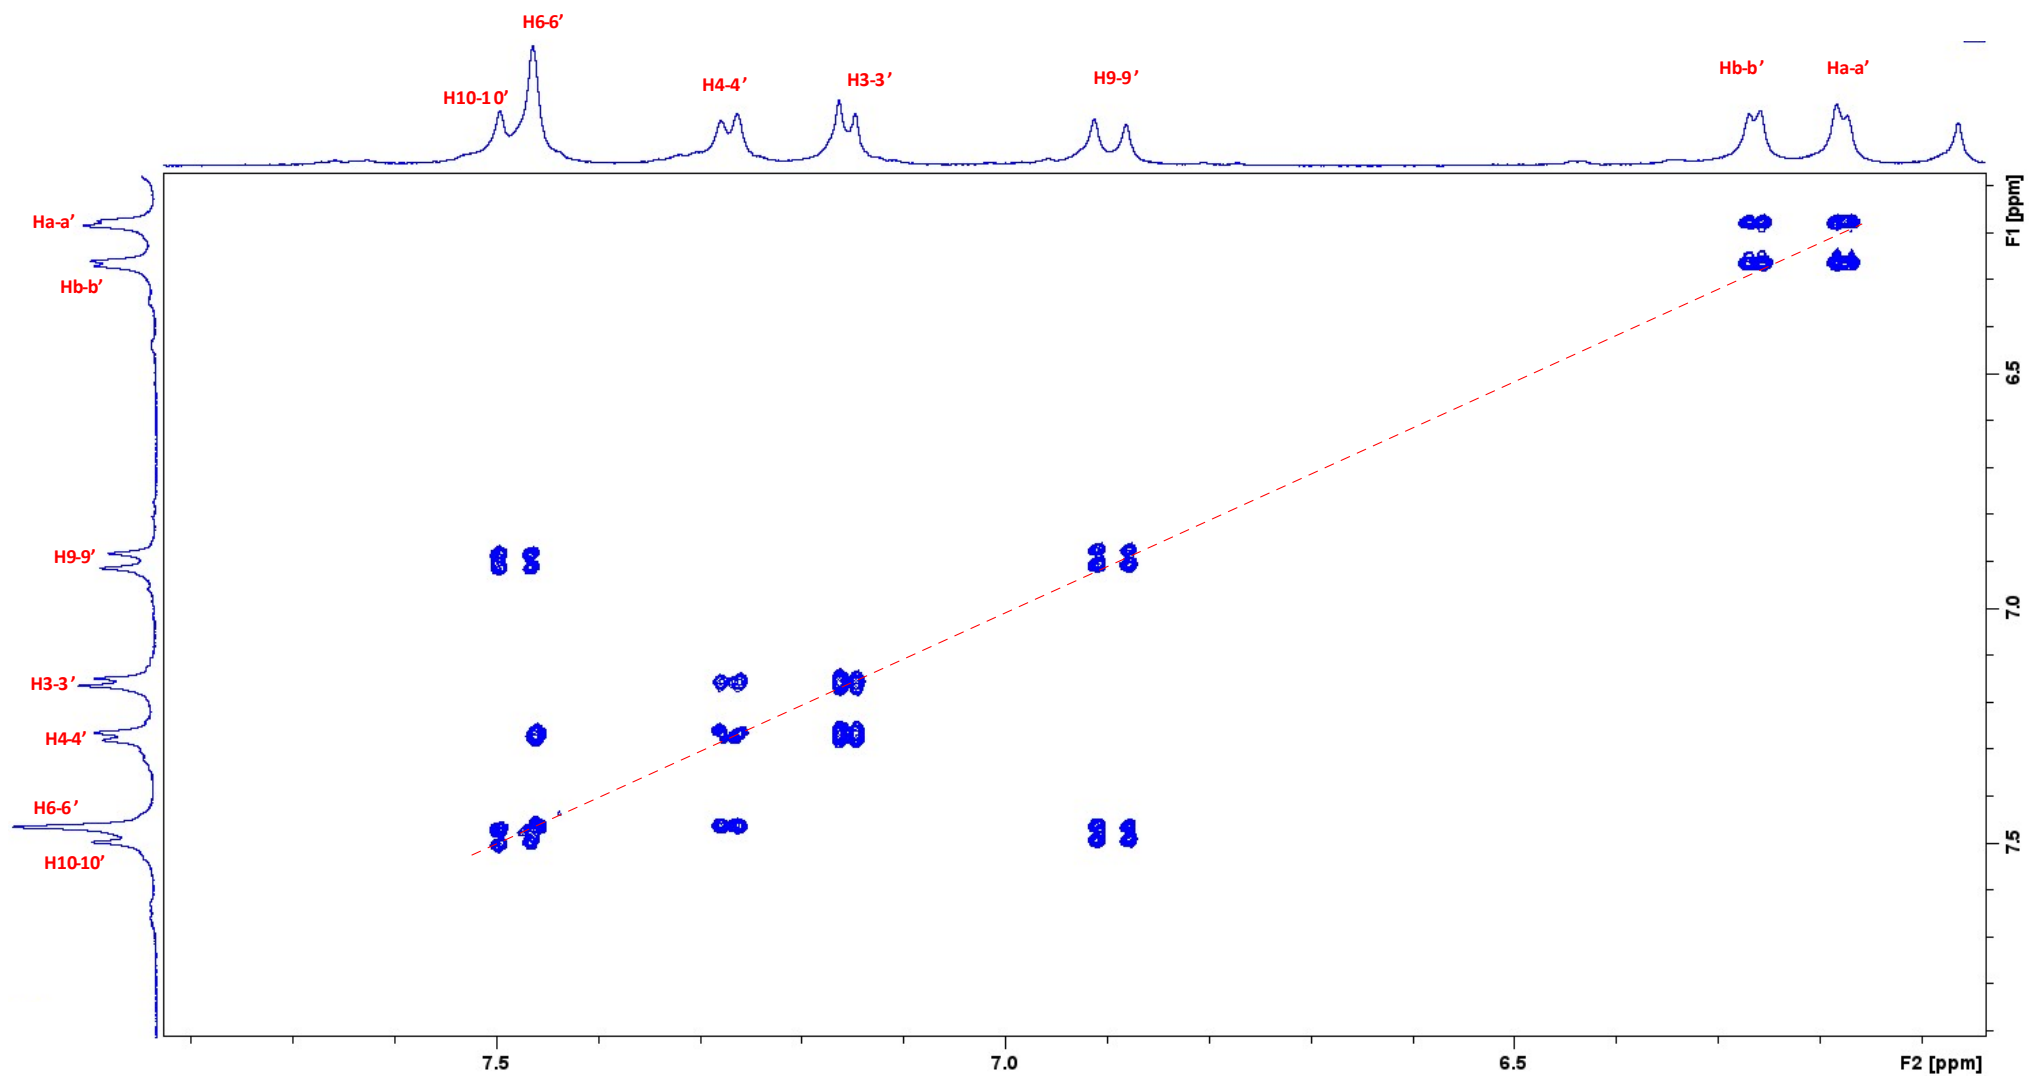

Figure S38 (b). Magnification of  $\{^1\text{H}-^1\text{H}\}$ -COSY NMR

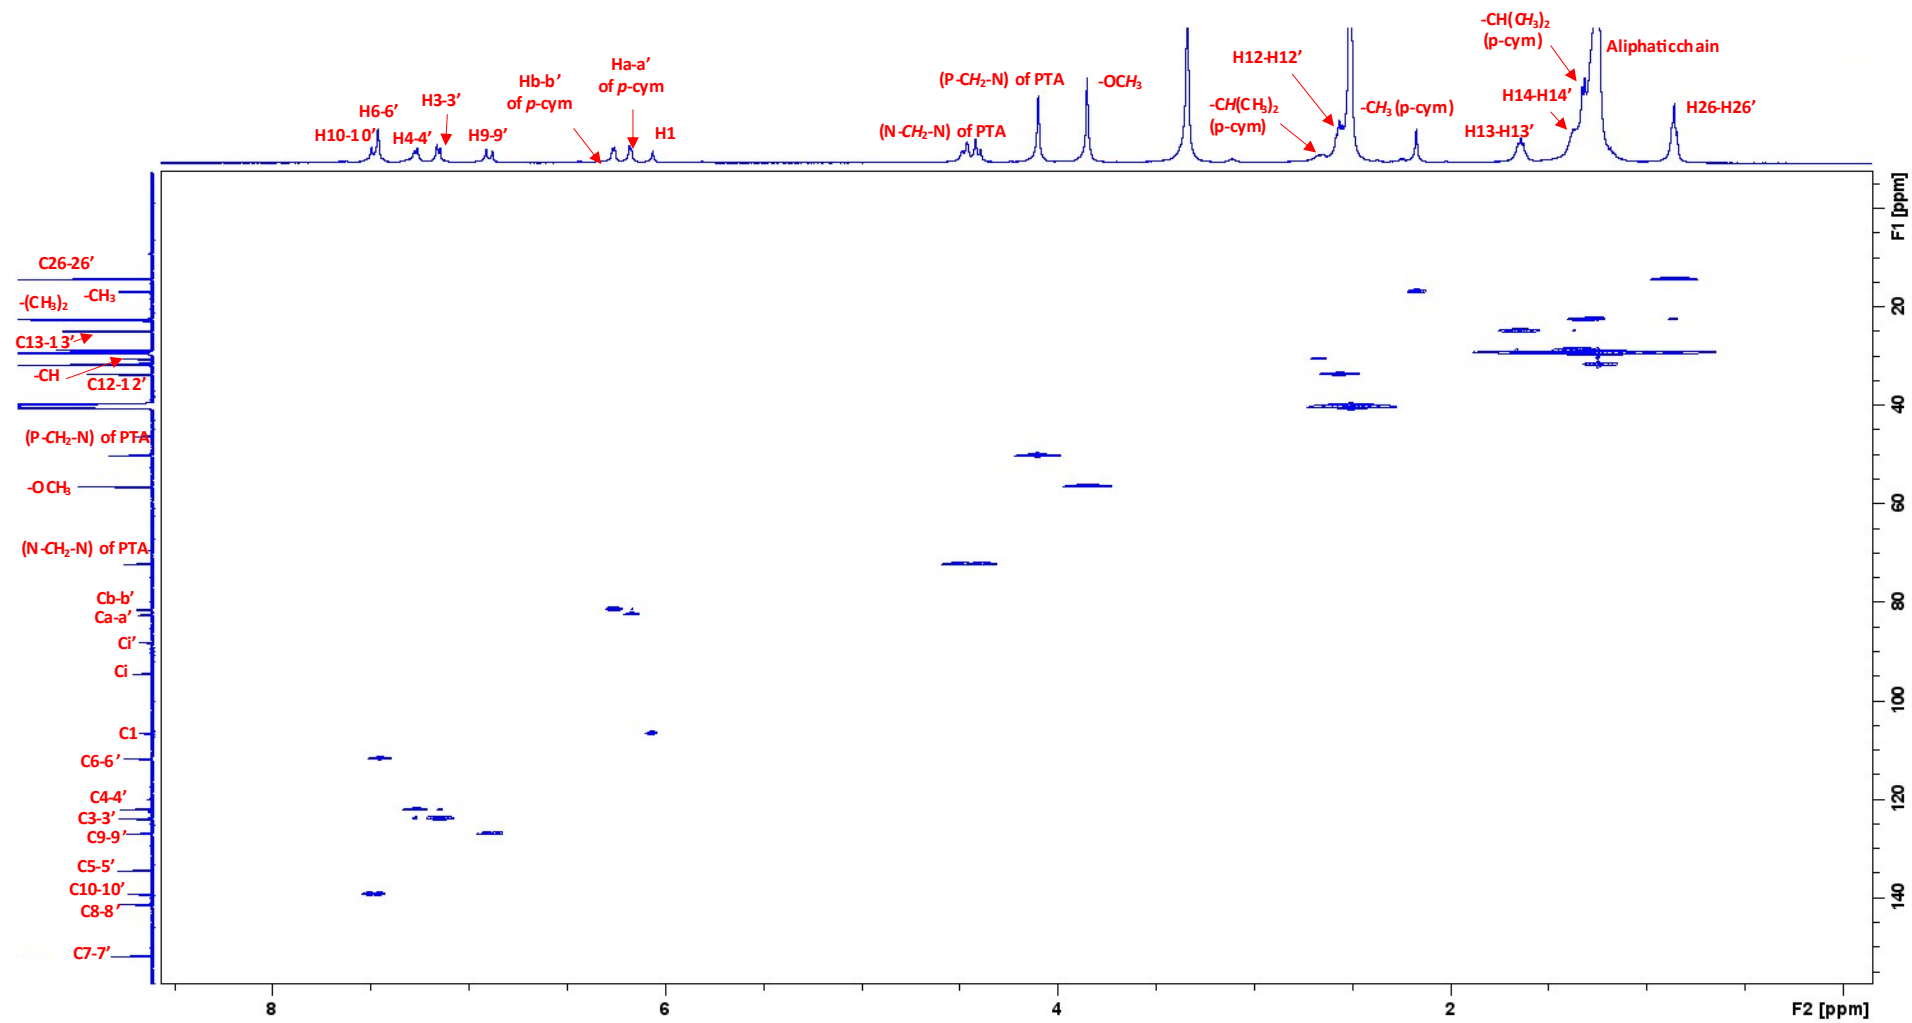

Figure S39.  $\{^1\text{H}-^{13}\text{C}\}$ -HSQC NMR of **7** in DMSO at 293 K

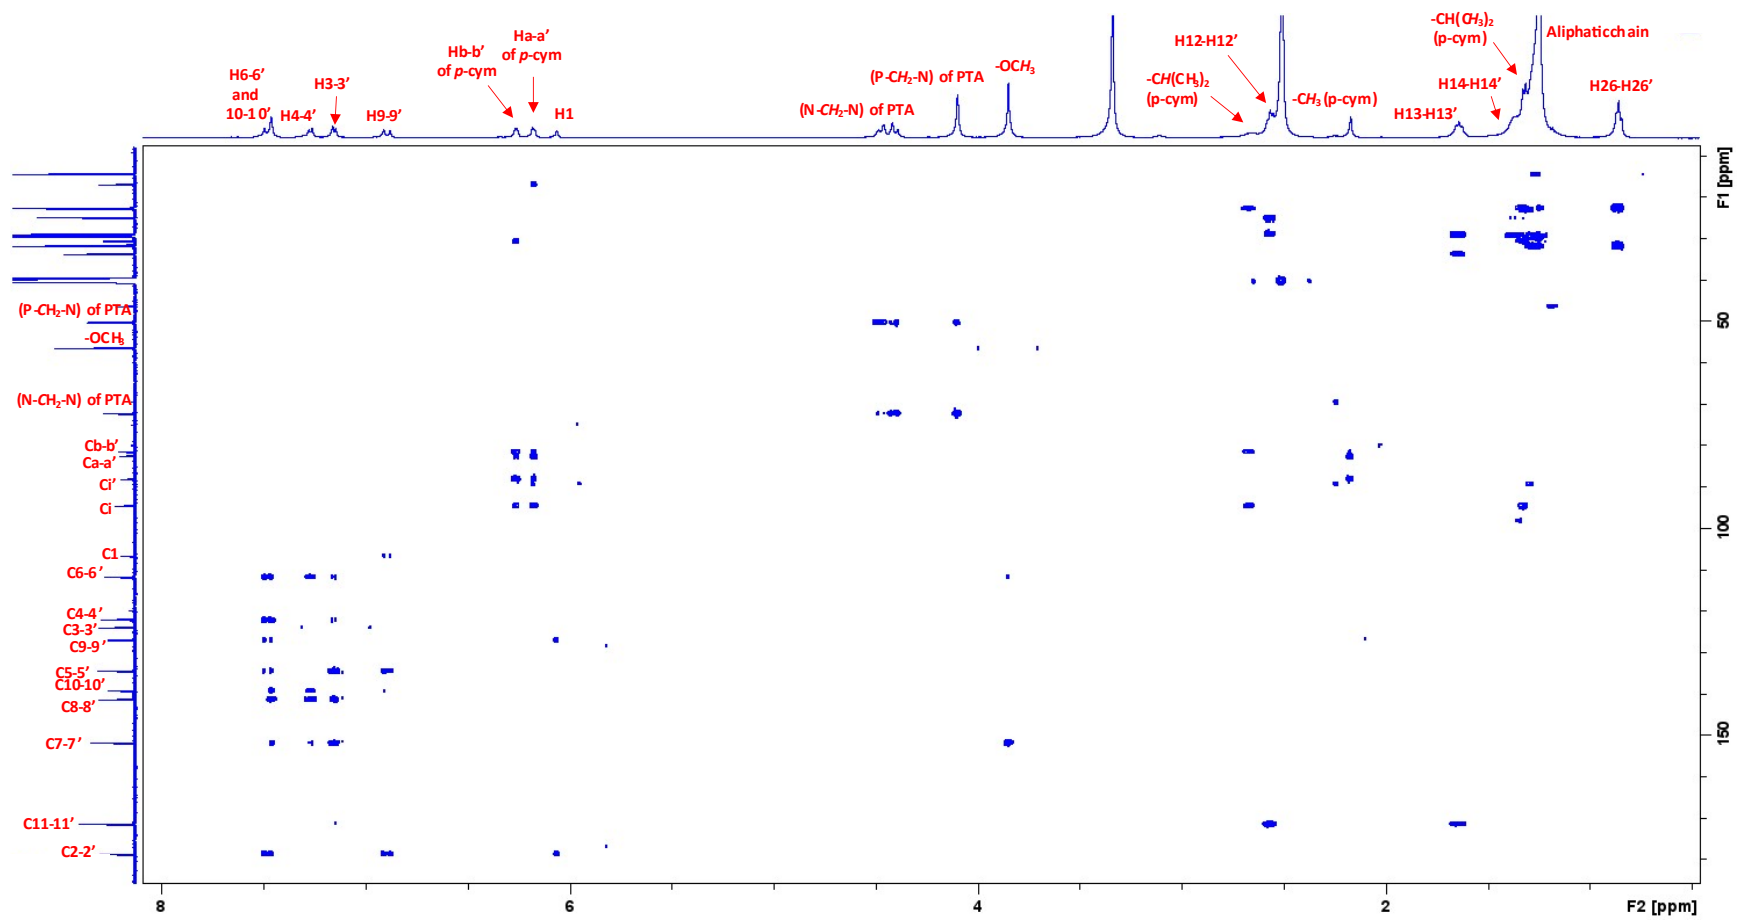

Figure S40.  $\{^1\text{H}-^{13}\text{C}\}$ -HMBC NMR of **7** in DMSO at 293 K

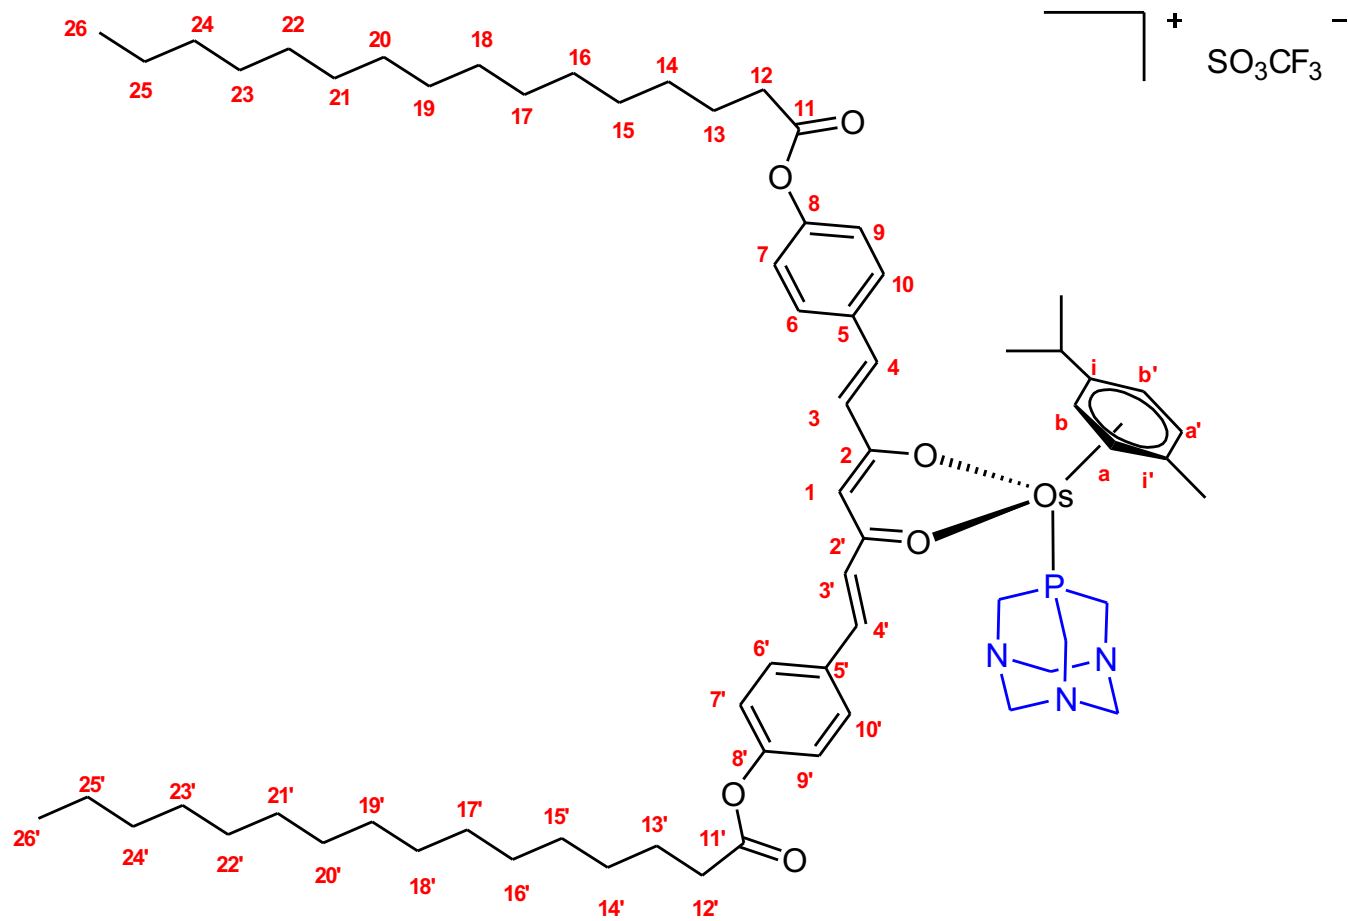

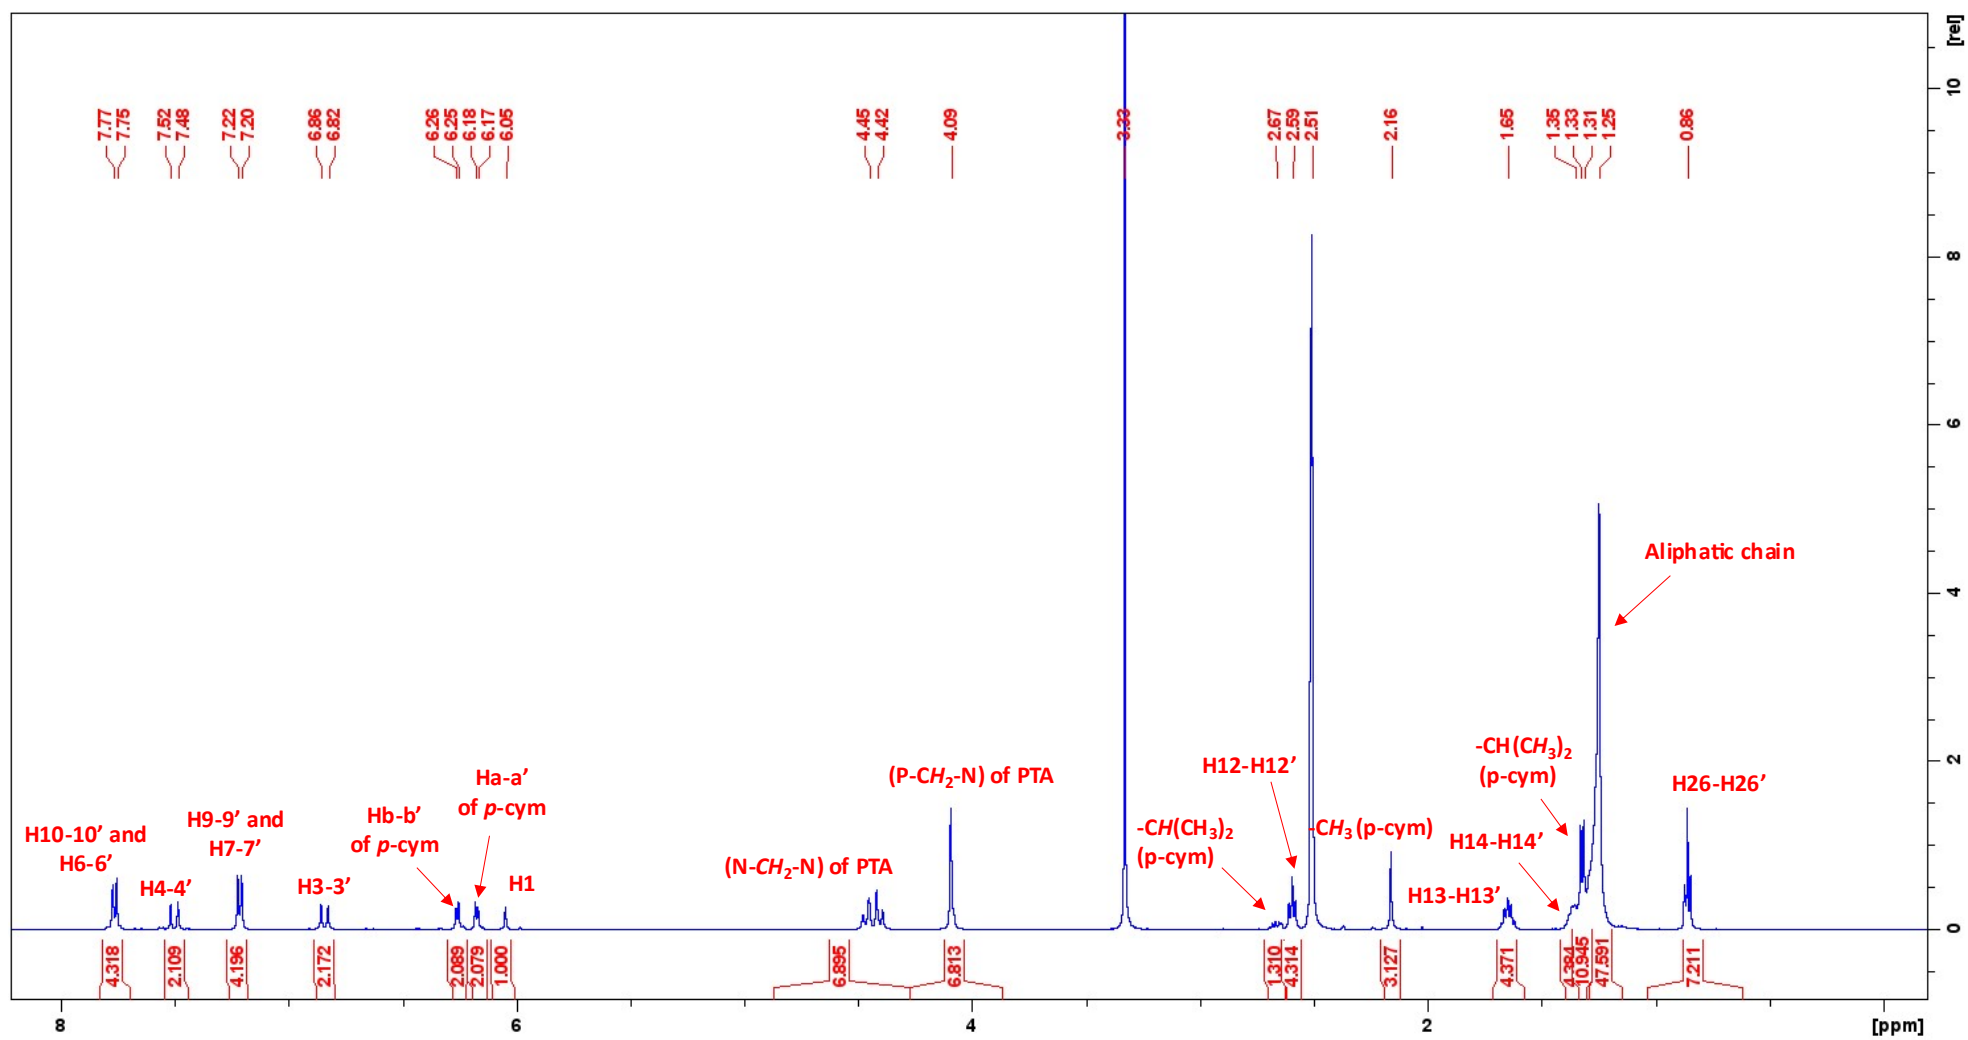

**Figure S41.**  $^1\text{H-NMR}$  of **8** in DMSO at 293 K

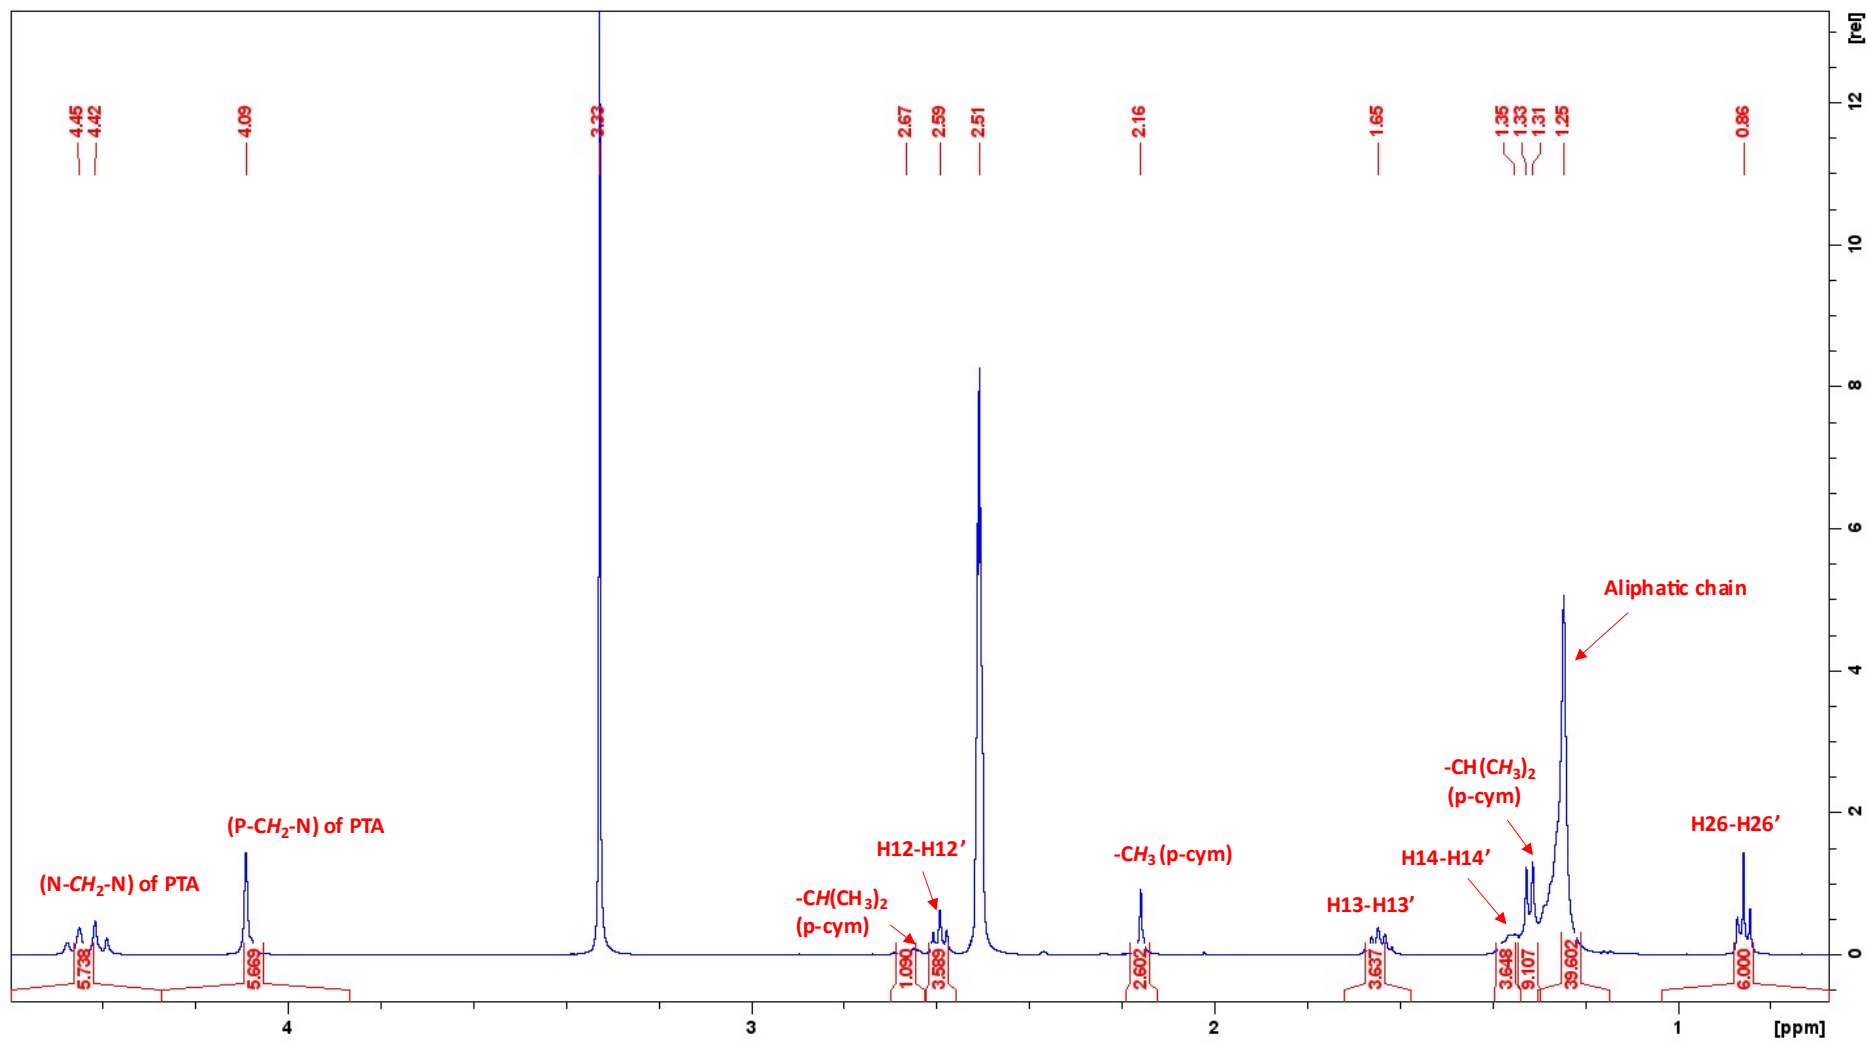

Figure S41 (a). Magnification of <sup>1</sup>H-NMR (1-5 ppm)



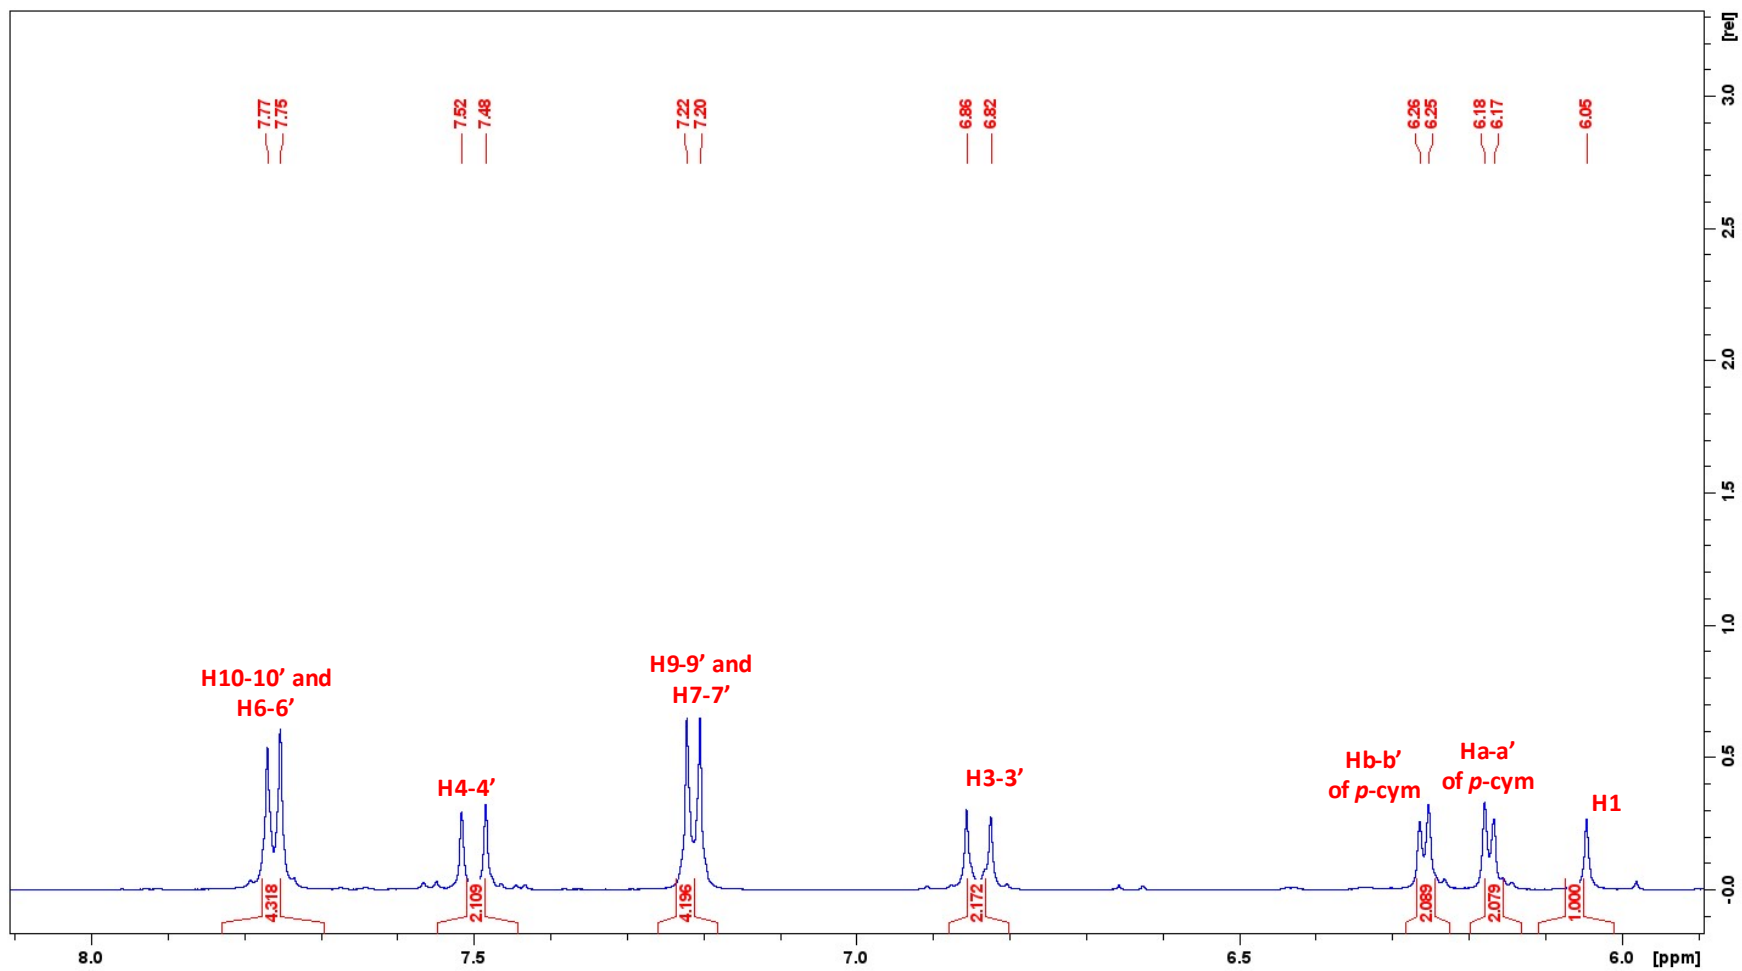

Figure S41 (b). Magnification of <sup>1</sup>H-NMR (5-8 ppm)

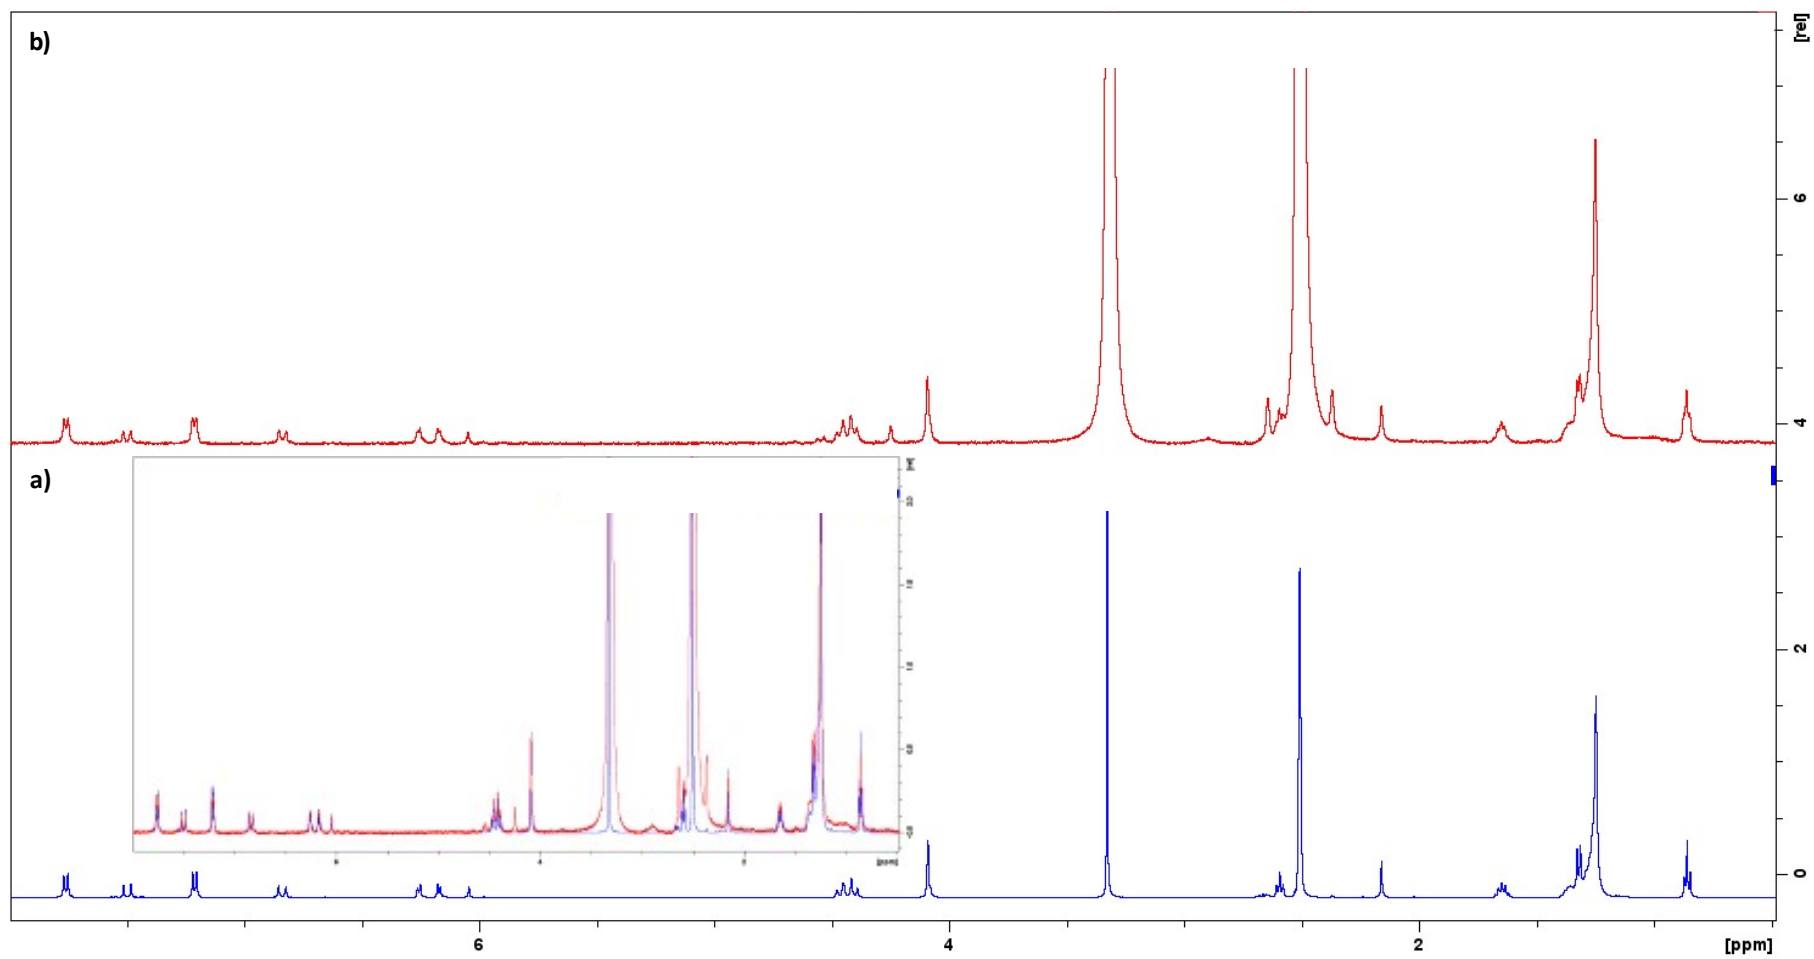

**Figure S41 (c).** Comparison of <sup>1</sup>H-NMR spectra of complex **8** at t=0 (a) and after 5 days (b)

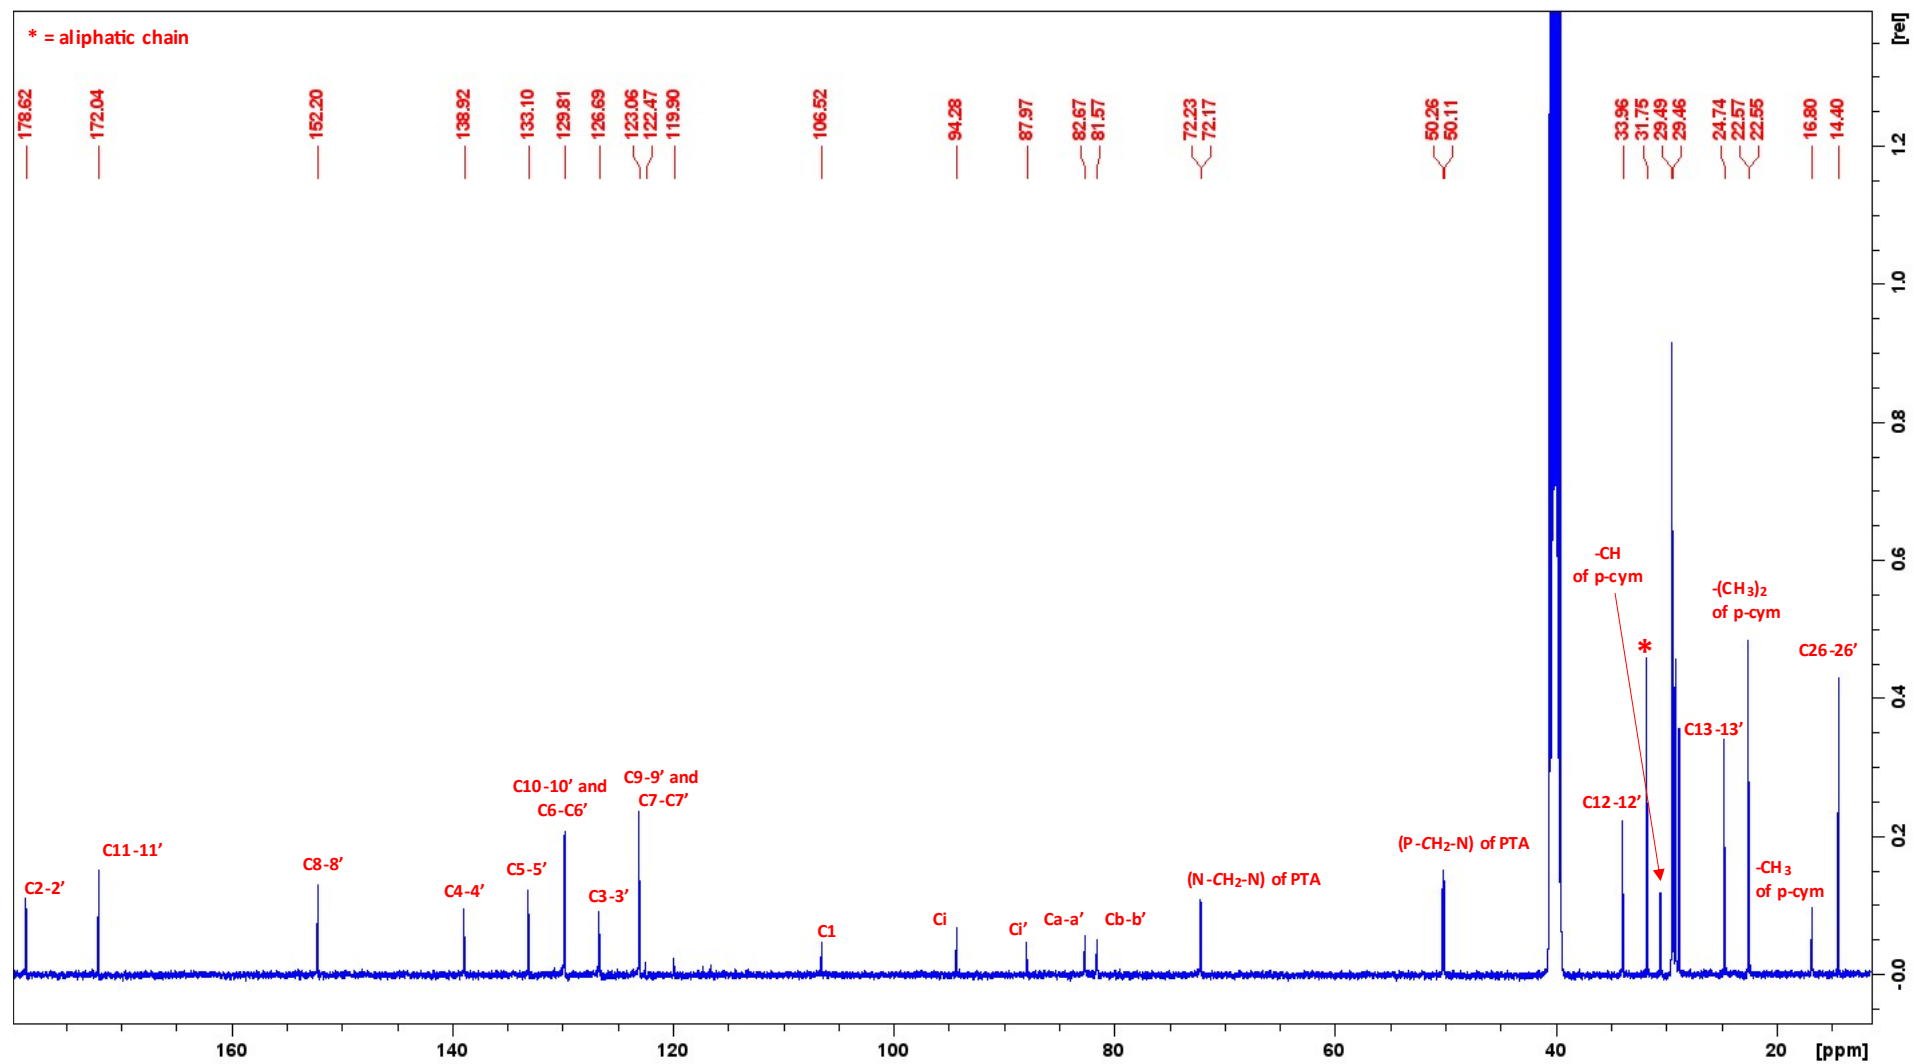

Figure S42. <sup>13</sup>C-NMR of **8** in DMSO at 293 K

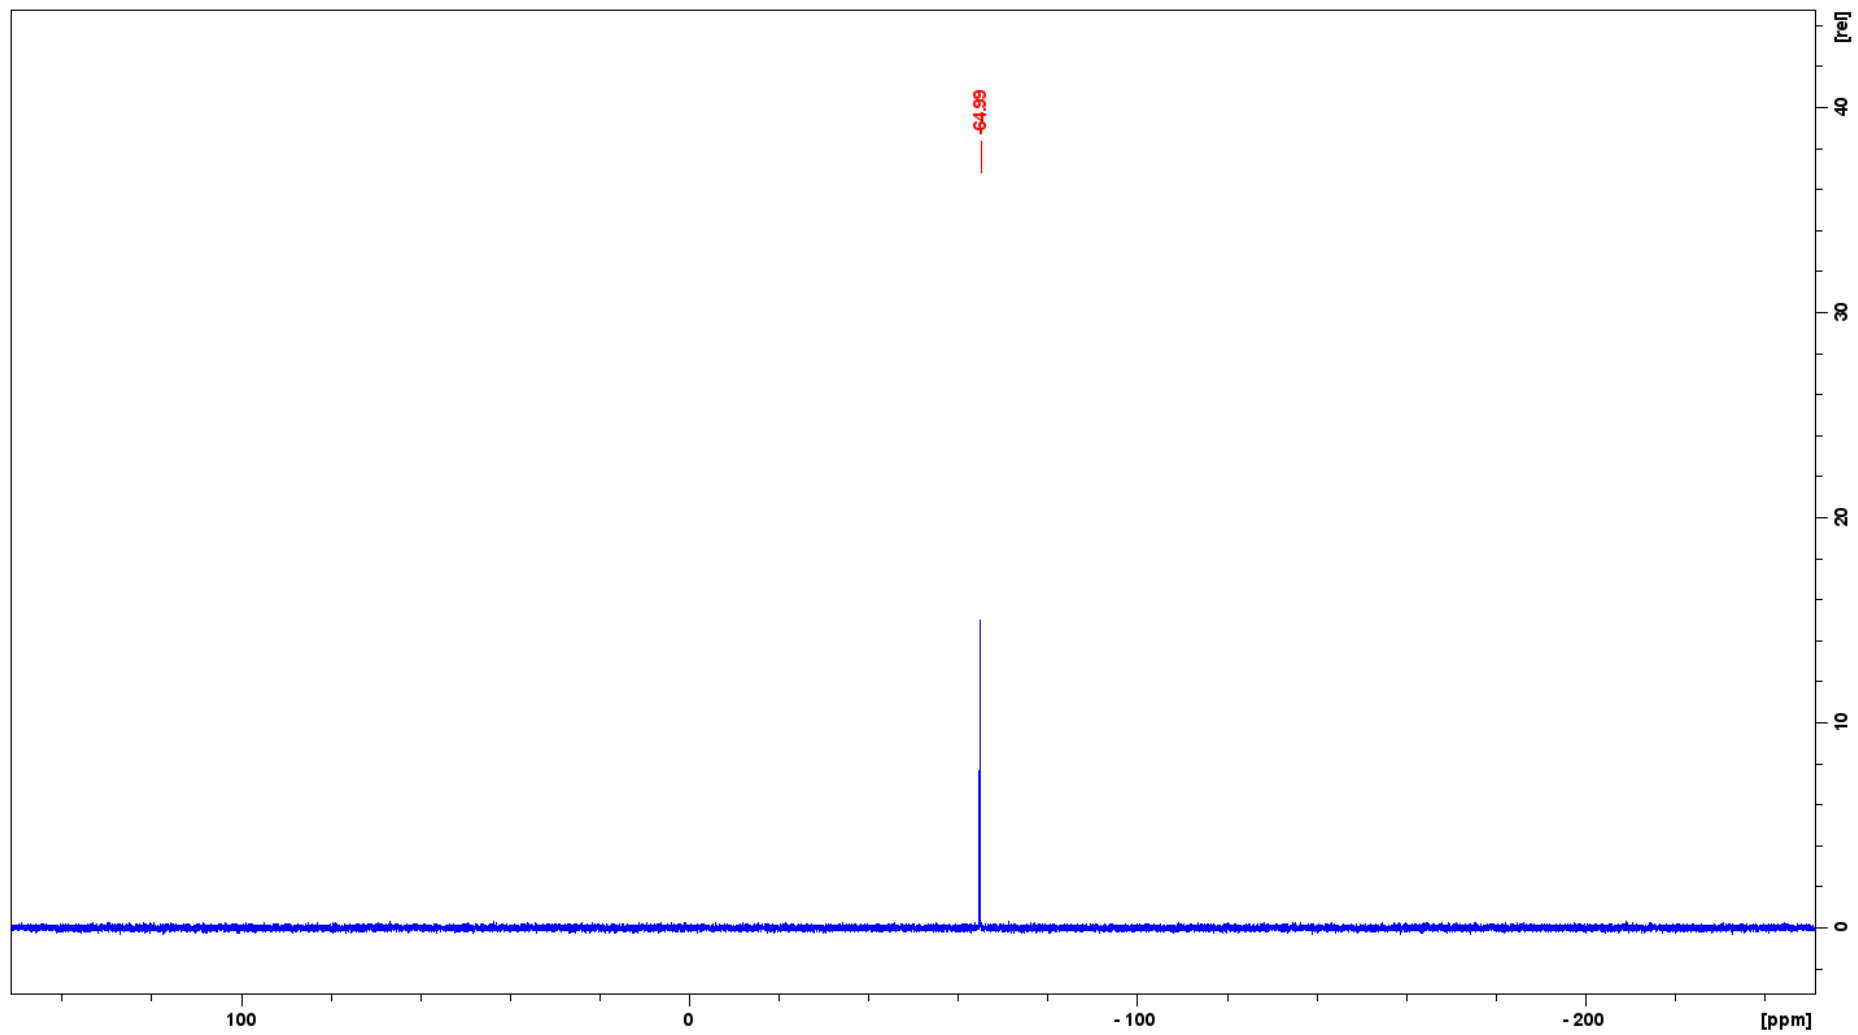

**Figure S43.**  $^{31}\text{P}$ -NMR of **8** in DMSO at 293 K

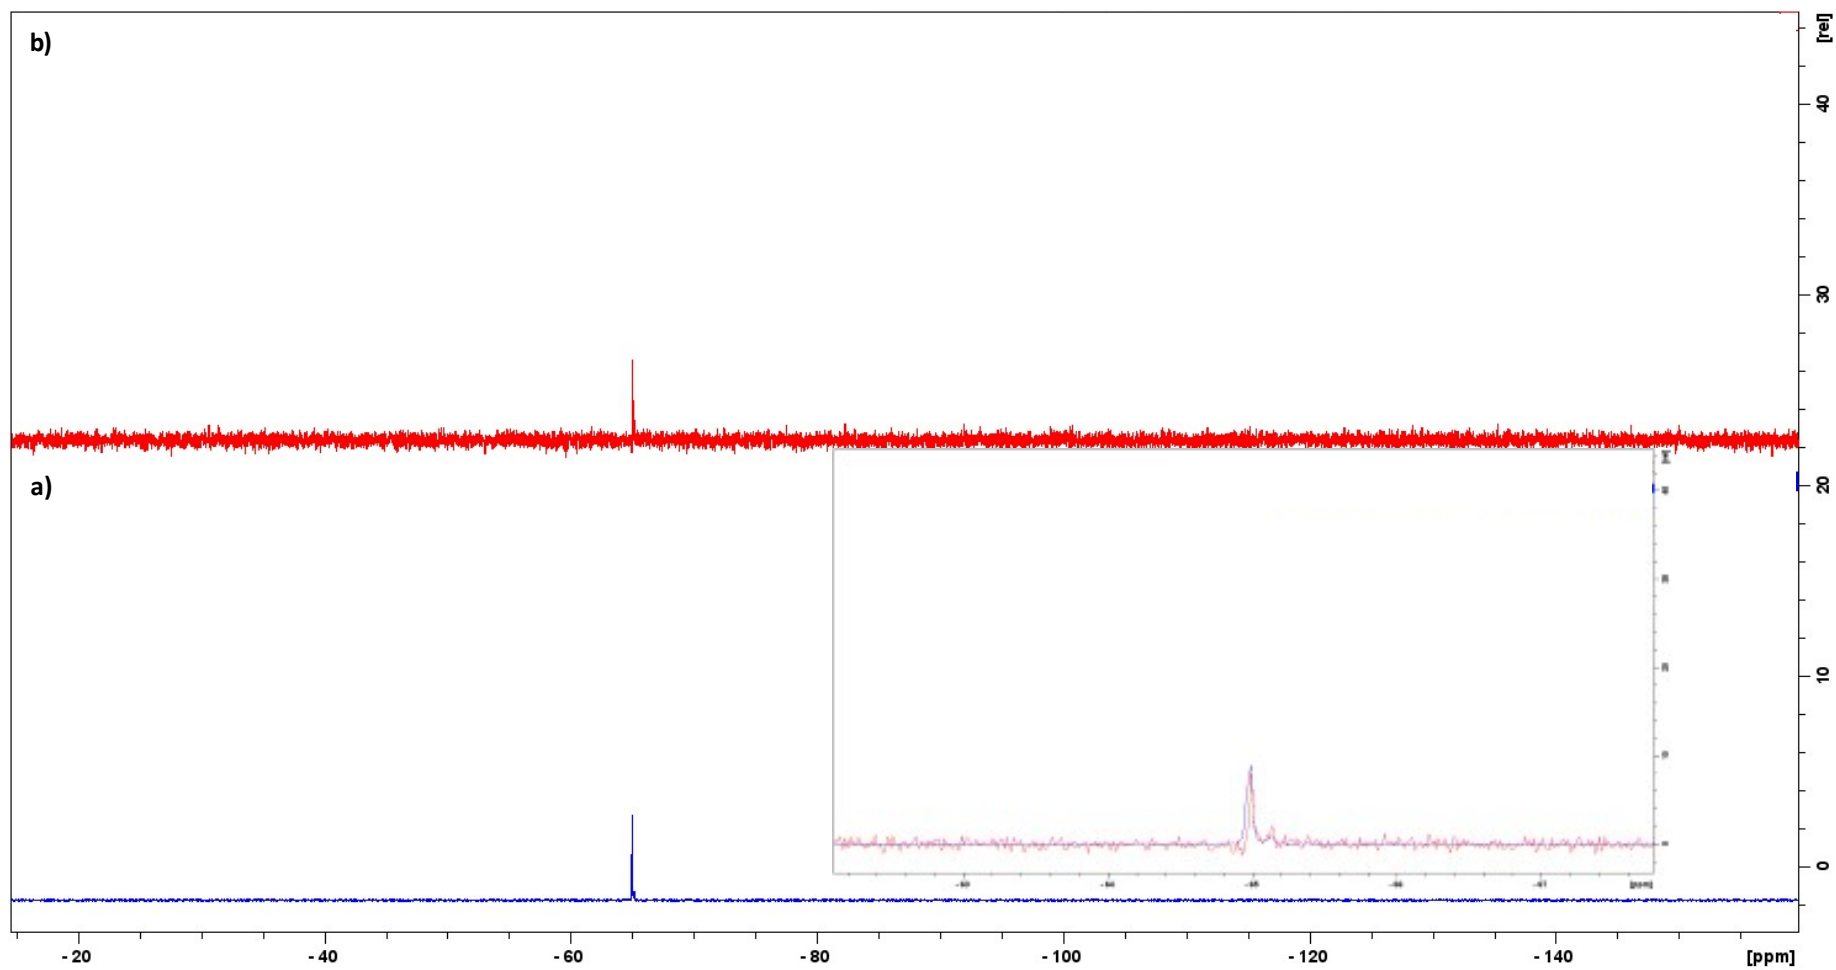

**Figure S43 (a).** Comparison of  $^{31}\text{P}$ -NMR spectra of complex **8** at  $t=0$  (a) and after 5 days (b)

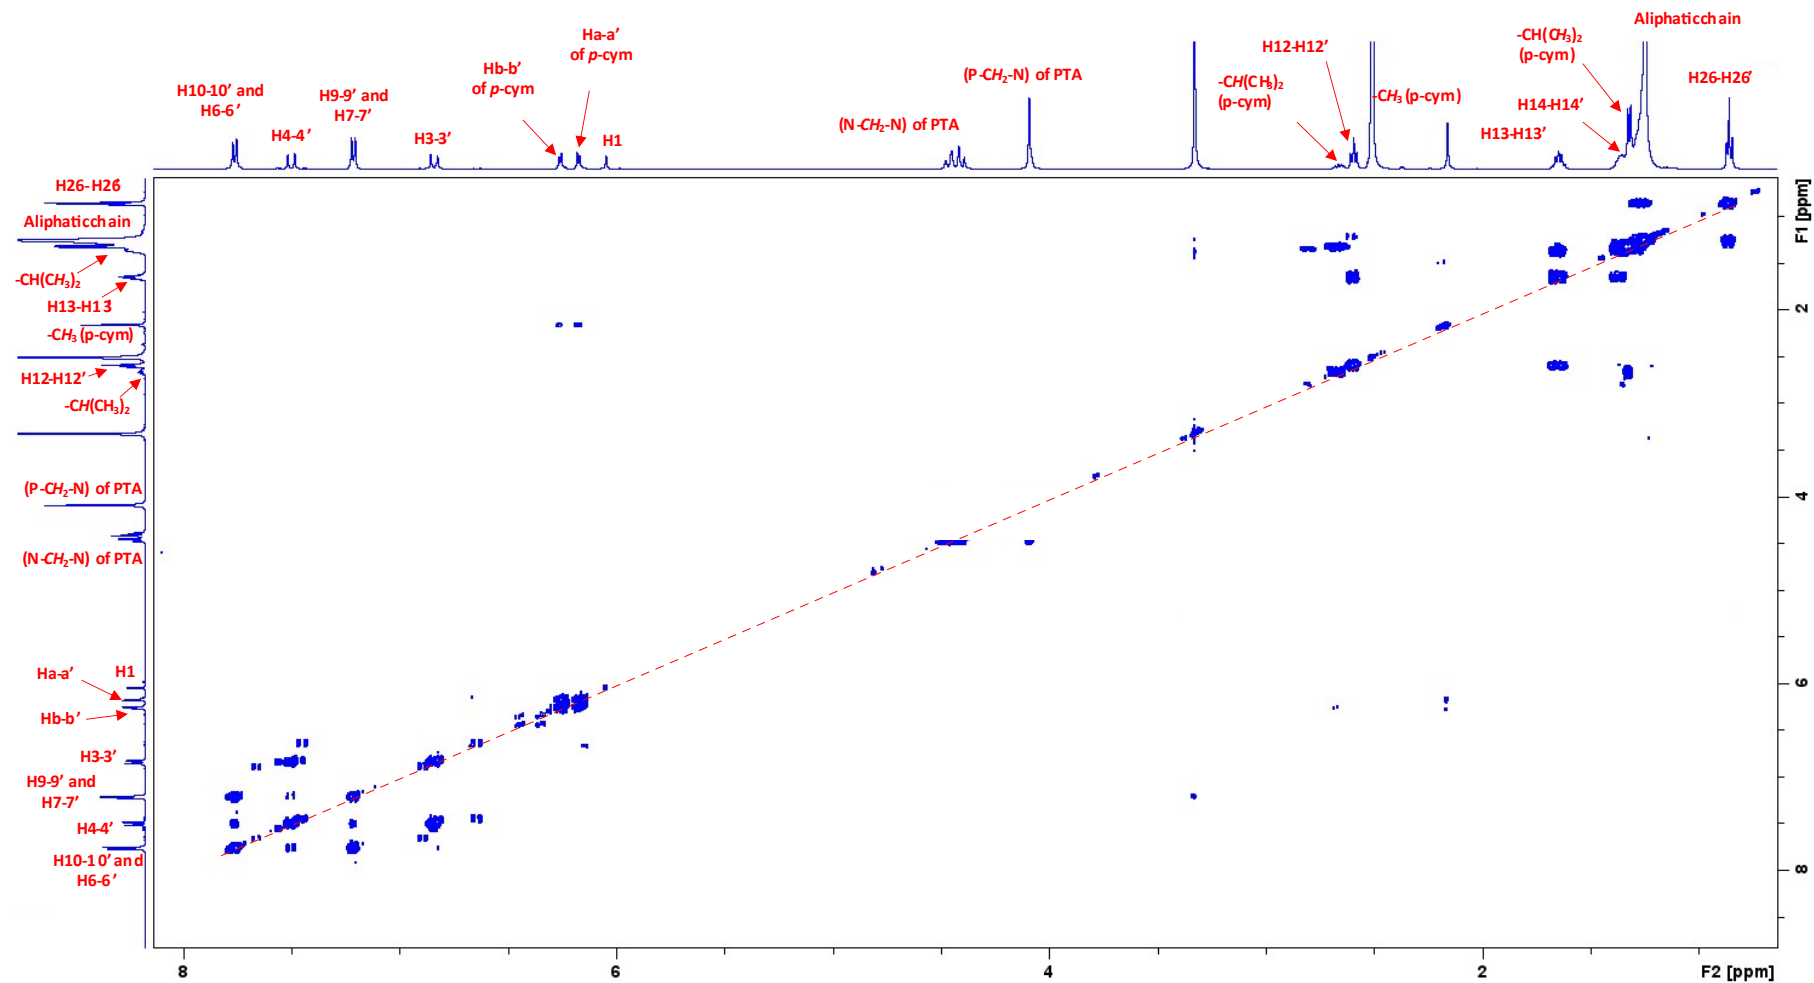

Figure S44.  $\{^1\text{H}-^1\text{H}\}$ - COSY NMR of **8** in DMSO at 293 K

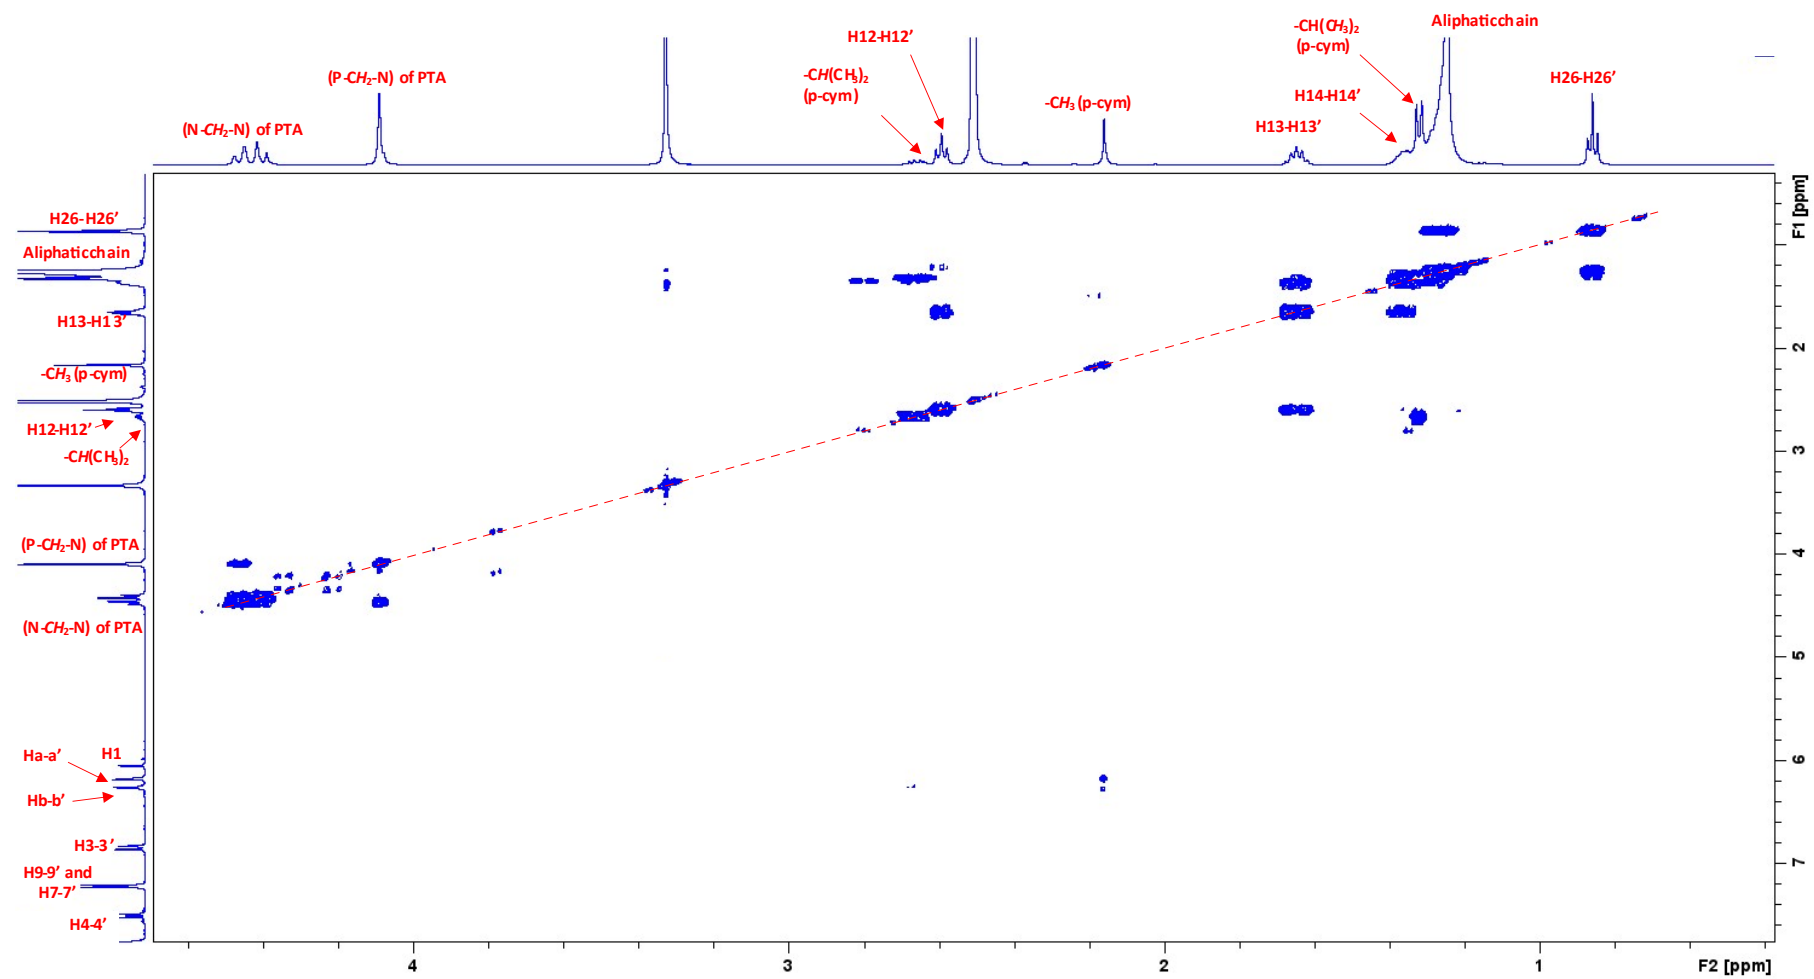

Figure S44 (a). Magnification of  $\{^1\text{H}-^1\text{H}\}$ - COSY NMR

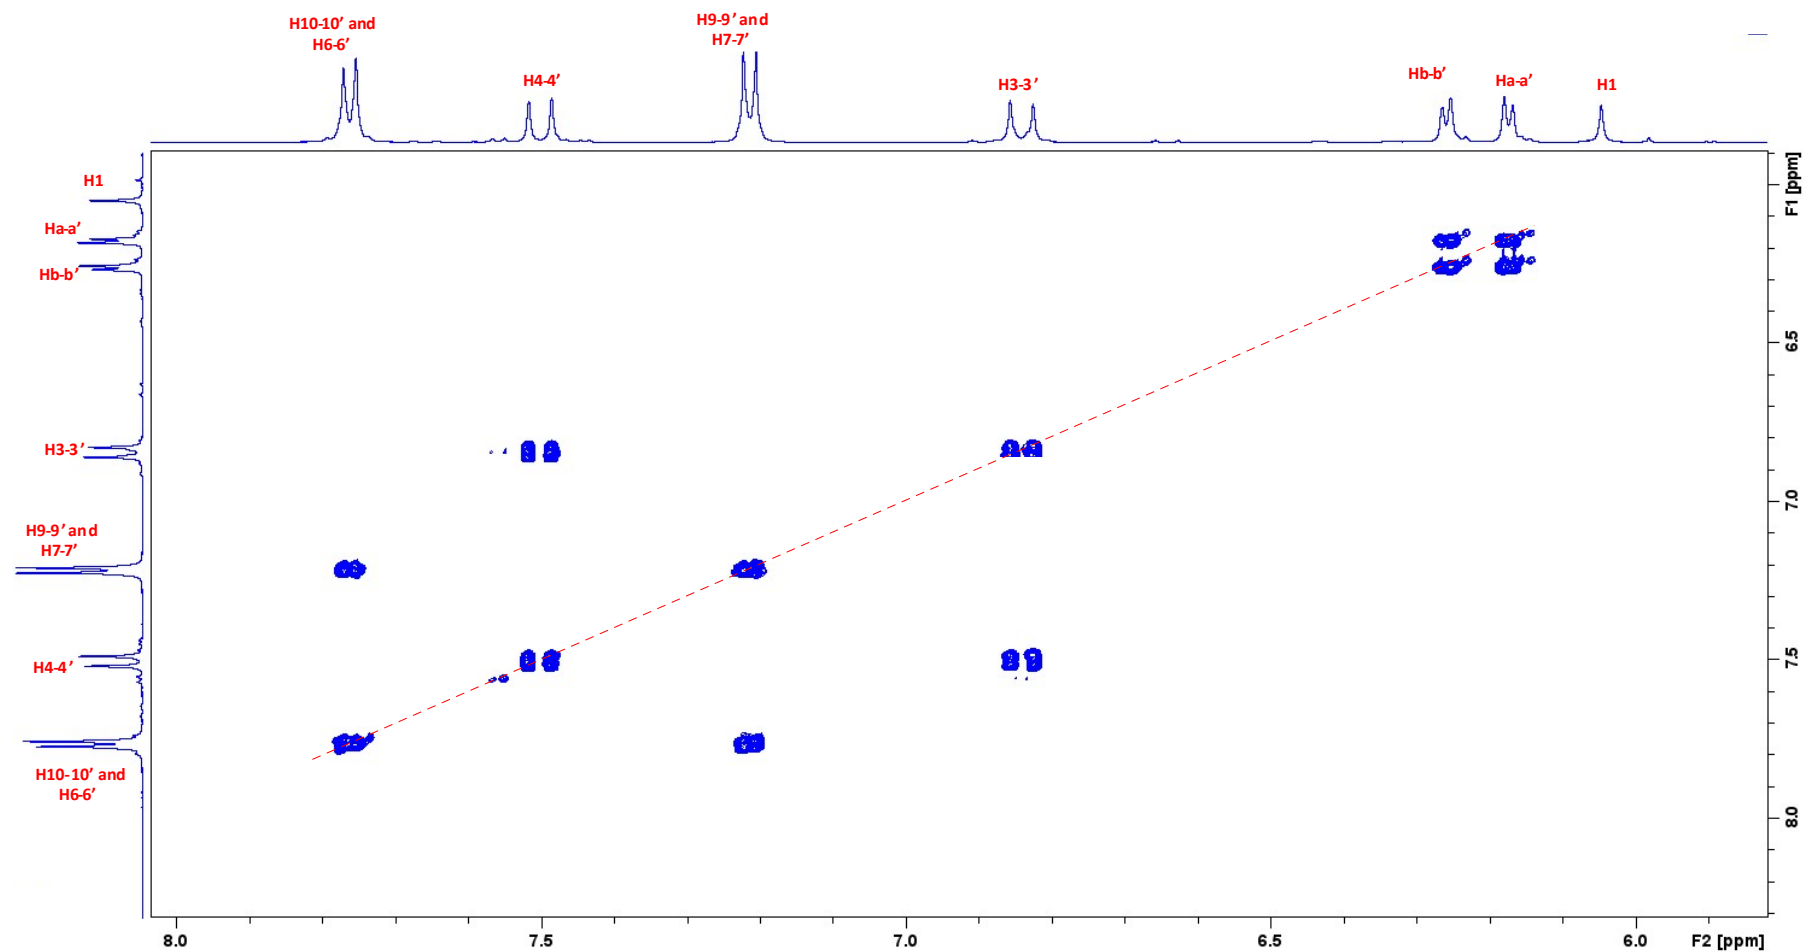

Figure S44 (b). Magnification of  $\{^1\text{H}-^1\text{H}\}$ - COSY NMR



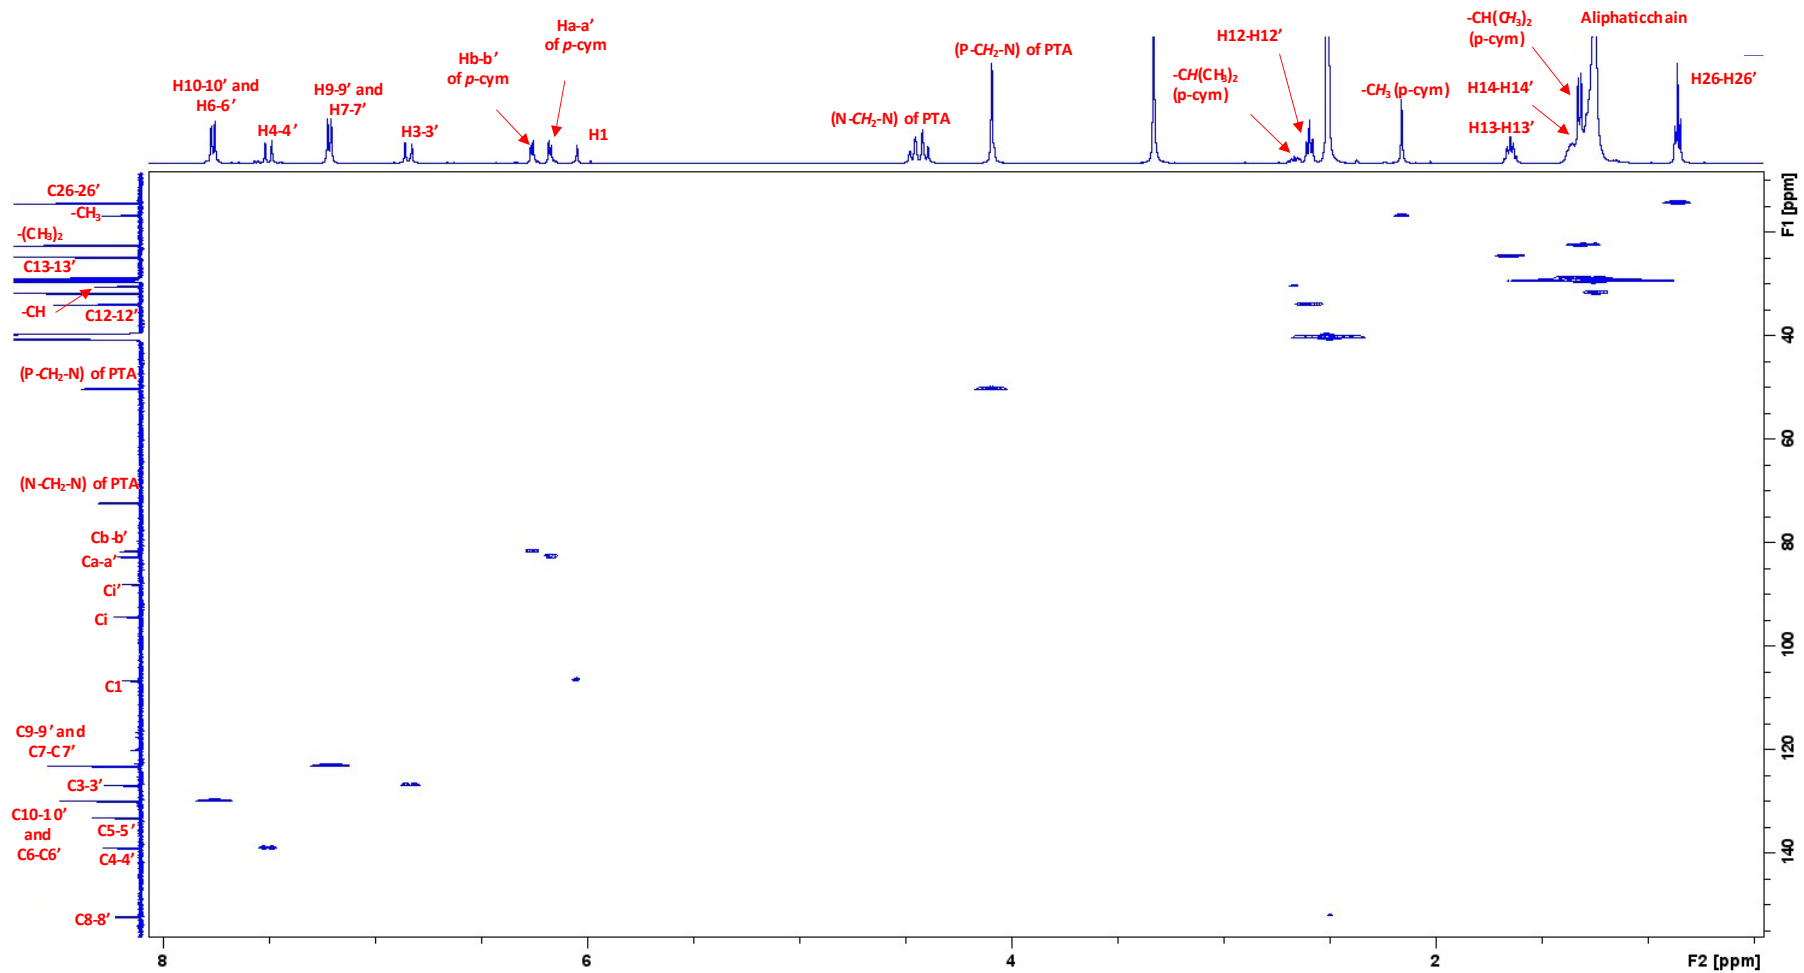

Figure S45.  $\{^1\text{H}-^{13}\text{C}\}$ - HSQC NMR of **8** in DMSO at 293 K

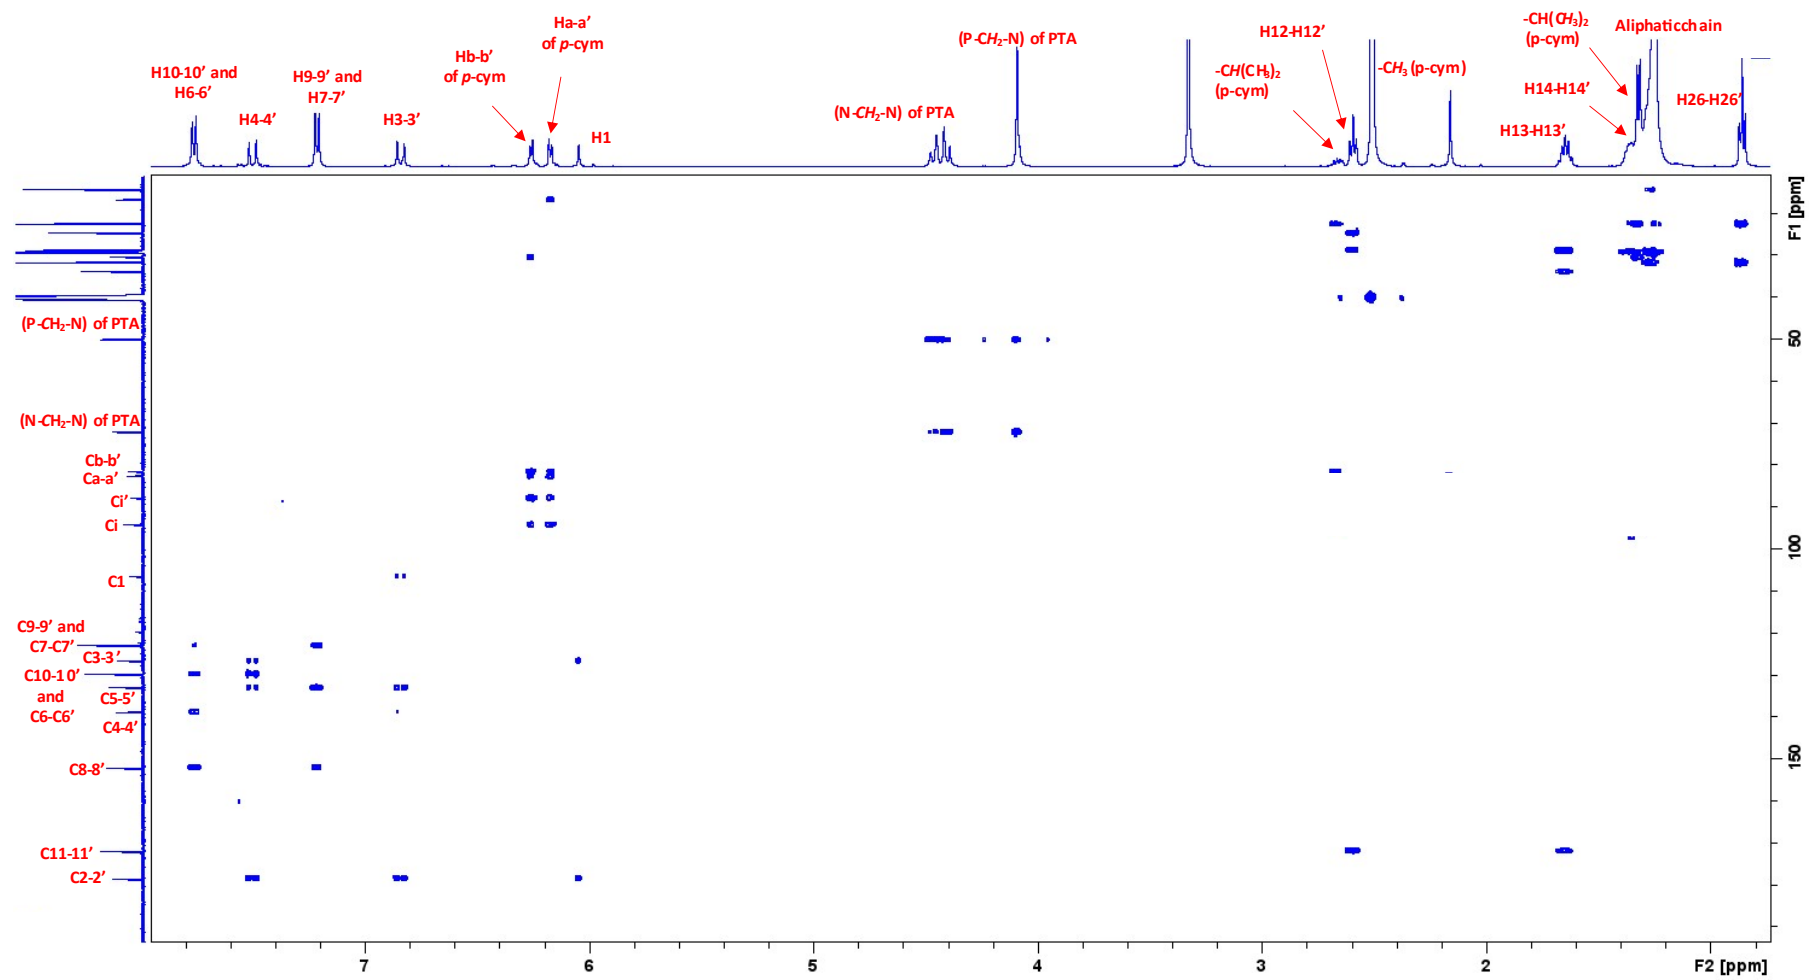

Figure S46.  $\{^1\text{H}-^{13}\text{C}\}$ - HMBC NMR of **8** in DMSO at 293 K

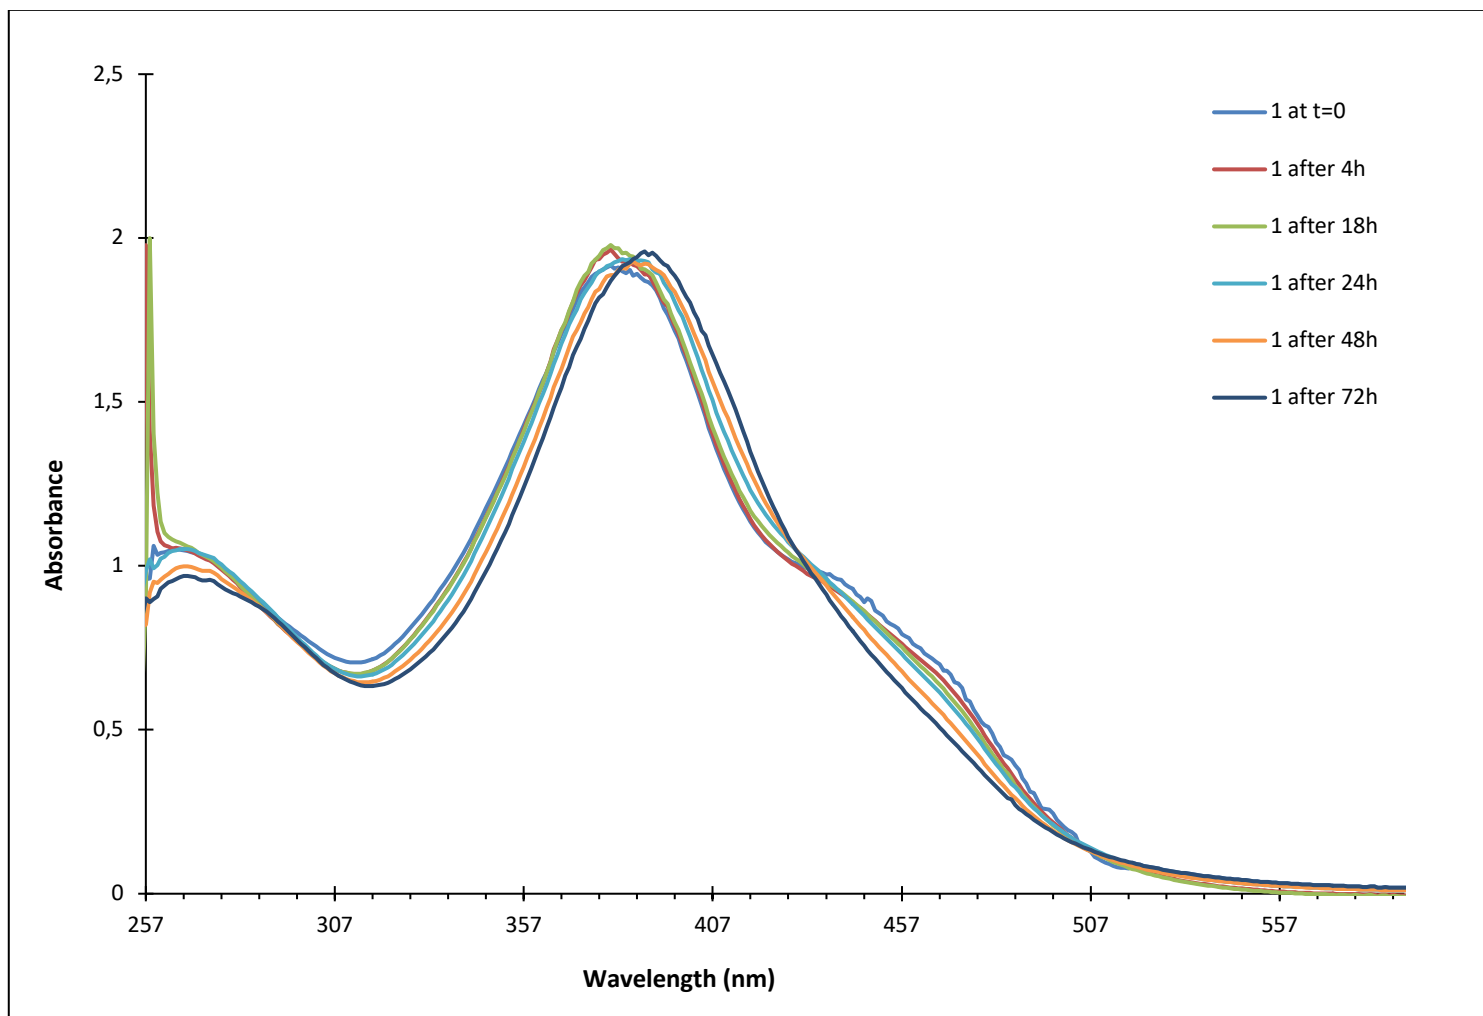

**Figure S47.** UV-vis spectrum of **1** in DMSO at 293 K

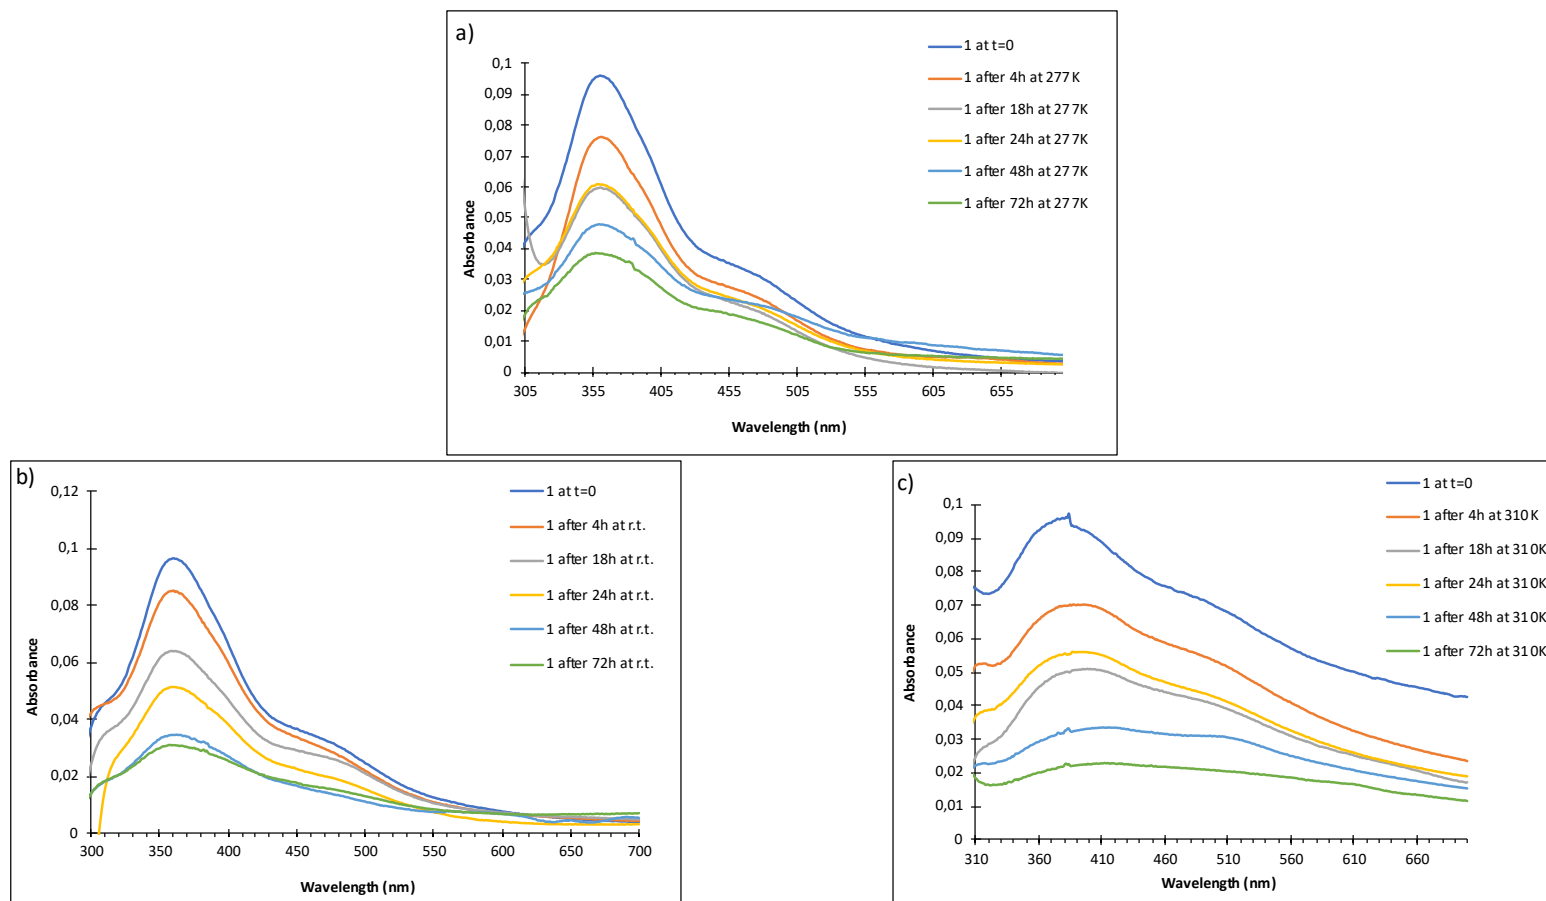

**Figure S48.** UV-vis spectrum of **1** in DMSO-PBS (5%) at : 277 K (a), room temperature (b) and 310 K(c).

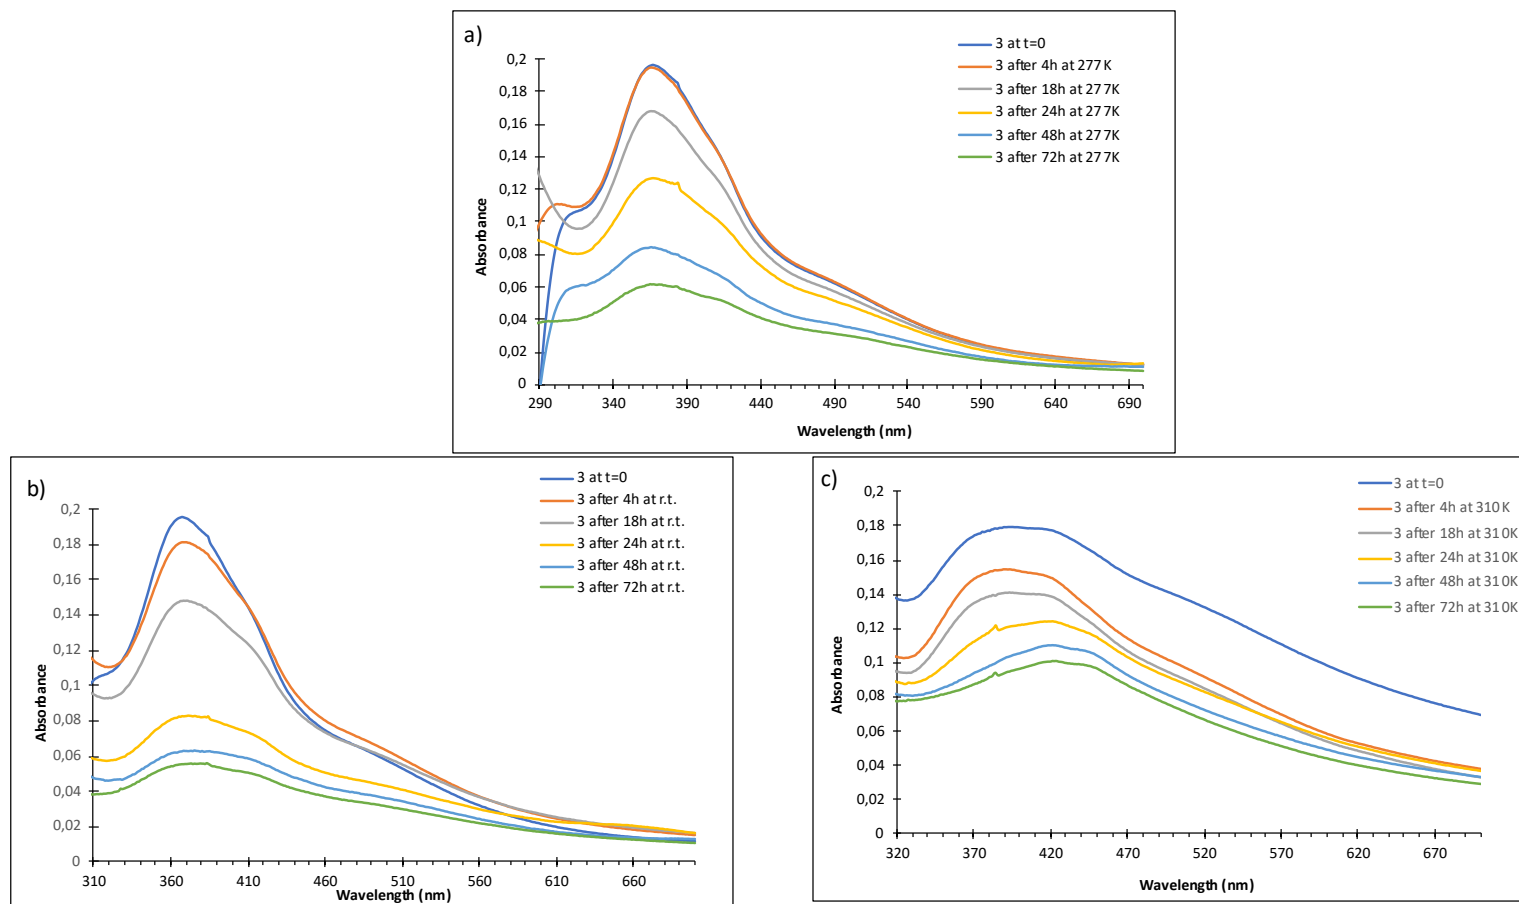

**Figure S49.** UV-vis spectrum of **3** in DMSO-PBS (5%) at : 277 K (**a**), room temperature (**b**) and 310 K(**c**).

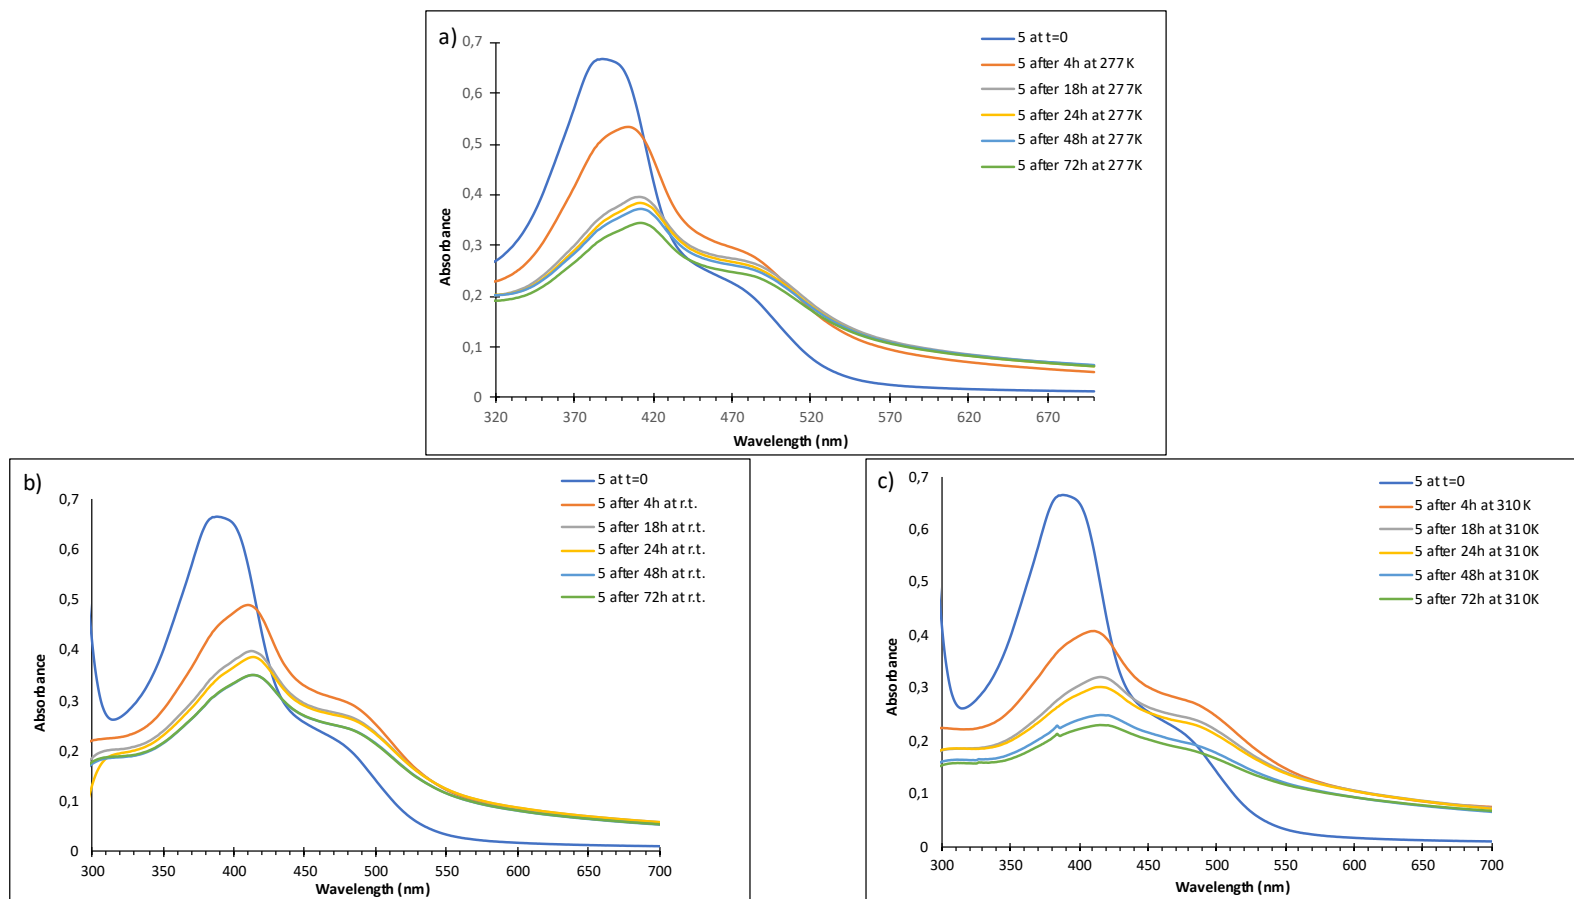

**Figure S50.** UV-vis spectrum of **5** in DMSO-PBS (5%) at : 277 K **(a)**, room temperature **(b)** and 310 K**(c)**.

|                   | Compound                                                | A2780         | A2780cis    | HEK 293T  |
|-------------------|---------------------------------------------------------|---------------|-------------|-----------|
| Ref. <sup>1</sup> | [Ru(cym)(bdcurc)(PTA)]PF <sub>6</sub>                   | 0.14 ± 0.05   | 0.51 ± 0.10 | 2.0 ± 0.1 |
| 4                 | [Os(cym)(p-bdcurc)Cl]                                   | 0.4 ± 0.1     | >50         | >50       |
| Ref. <sup>1</sup> | [Ru(cym)(curc)(PTA)]SO <sub>3</sub> CF <sub>3</sub>     | 0.39 ± 0.16   | 0.36 ± 0.02 | 4.5 ± 0.5 |
| 2                 | [Ru(cym)(p-bdcurc)Cl]                                   | 0.5 ± 0.2     | 6.3 ± 7.7   | >50       |
| Ref. <sup>1</sup> | [Ru(cym)(bdcurc)(PTA)]SO <sub>3</sub> CF <sub>3</sub>   | 0.81 ± 0.14   | 0.95 ± 0.21 | 22 ± 4.0  |
| Ref. <sup>1</sup> | [Ru(cym)(curc)(PTA)]PF <sub>6</sub>                     | 1.15 ± 0.05   | 1.18 ± 0.02 | 30 ± 1.0  |
| Ref. <sup>2</sup> | [Os(cym)(bdcurc)(PTA)]SO <sub>3</sub> CF <sub>3</sub>   | 1.9 ± 0.3     | 2.9 ± 0.2   | 34±4.0    |
| 8                 | [Os(cym)(p-bdcurc)(PTA)]SO <sub>3</sub> CF <sub>3</sub> | 3.7 ± 2.2     | 2.3 ± 0.4   | 3.7 ± 0.8 |
| 5                 | [Ru(cym)(p-curc)(PTA)]SO <sub>3</sub> CF <sub>3</sub>   | 6.1 ± 1.7     | 11.2 ± 0.6  | 24 ± 80   |
| 7                 | [Os(cym)(p-curc)(PTA)]SO <sub>3</sub> CF <sub>3</sub>   | 10.3 ± 2.9    | 14.9 ± 2.6  | 21 ± 10   |
| 6                 | [Ru(cym)(p-bdcurc)(PTA)]SO <sub>3</sub> CF <sub>3</sub> | 11.8 ± 2.6    | 14.4 ± 5.7  | 21 ± 19   |
| Ref. <sup>3</sup> | [Ru(cym)(curc)Cl]                                       | 23.38 ± 3.334 | -           | -         |
| Ref. <sup>2</sup> | [Os(cym)(curc)(PTA)]SO <sub>3</sub> CF <sub>3</sub>     | 32±2.0        | 35±2.0      | 69±7.0    |
| Ref. <sup>2</sup> | [Os(cym)(curc)Cl]                                       | 36±3.0        | 39±3.0      | 70±9.0    |
| 3                 | [Os(cym)(p-curc)Cl]                                     | 49 ± 6.0      | >50         | >50       |
| 1                 | [Ru(cym)(p-curc)Cl]                                     | 43 ± 5.0      | >50         | >50       |
| Ref. <sup>2</sup> | [Os(cym)(bdcurc)Cl]                                     | 169 ± 17.0    | 169 ± 17.0  | >200      |
|                   | RAPTA-C                                                 | >100          | >100        | >100      |
|                   | Cisplatin                                               | 1.1 ± 0.5     | 7.7 ± 0.9   | 3.4 ± 1.7 |

**Table S1.** IC<sub>50</sub> values of all curcuminoid complexes for A2780, A2780R and HEK

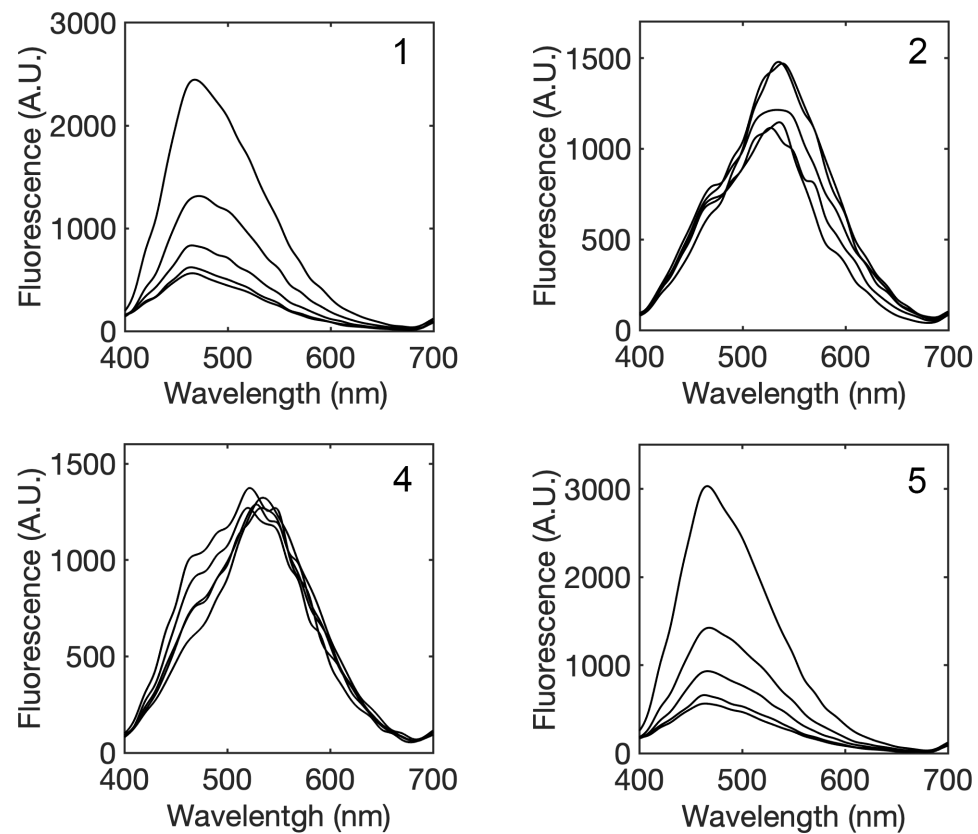

**Figure S51.** Changes in fluorescence emission spectra of DAPI-DNA complex upon excitation at 338 nm in the presence of increasing concentrations of complexes **1**, **2**, **4** and **5**.



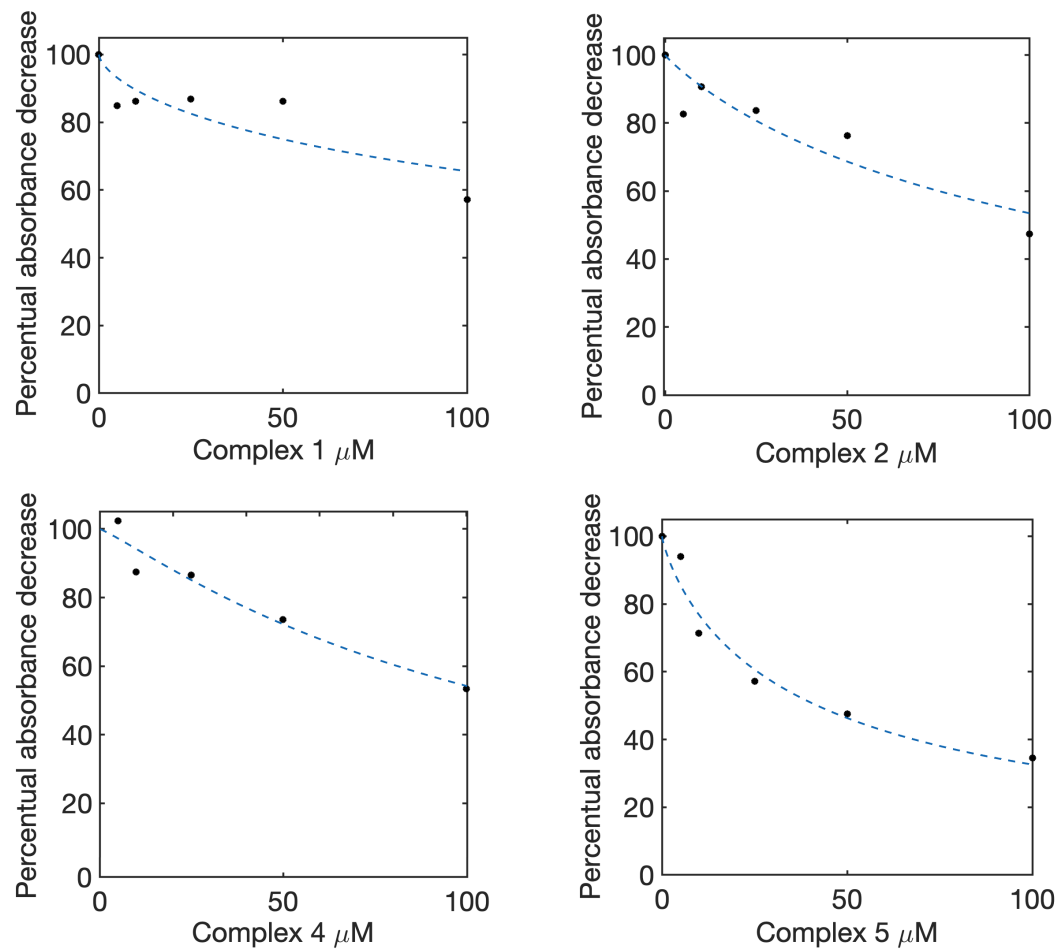

**Figure S52.** Decrease in absorbance at 600 nm of the MethylGreen-DNA complex in the presence of increasing concentrations of complexes **1**, **2**, **4** and **5**.

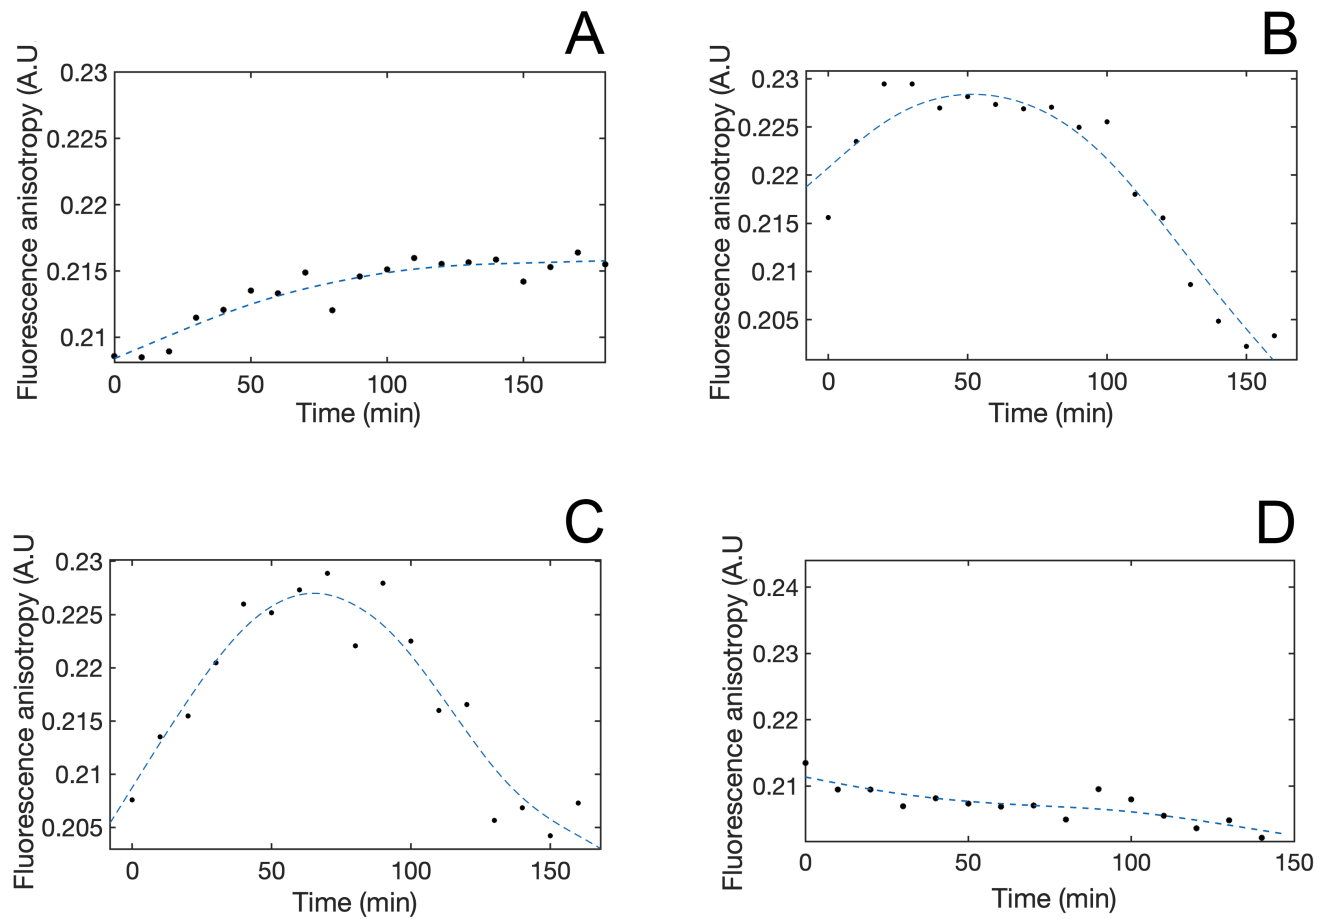

**Figure S53.** Comparative changes in emission anisotropy with time observed upon cell membrane passage of **1** (Panel A), **2** (Panel B), **4** (Panel C) and **5** (Panel D).

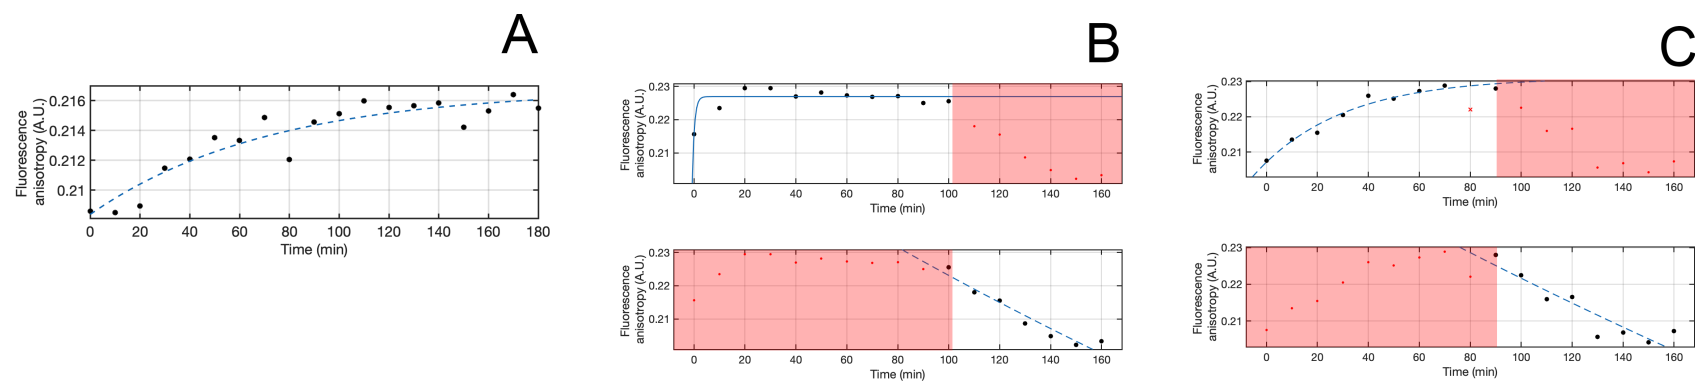

**Figure S54.** Detailed kinetic analyses of individual membrane entry/release stages of complex **1** (Panel A), complex **2** (Panel B) and complex **4** (Panel C).

|                  | $k_{in} (s^{-1})$ | $k_{out} (s^{-1})$  |
|------------------|-------------------|---------------------|
| <b>Complex 1</b> | $0.01 \pm 0.005$  | n/a                 |
| <b>Complex 2</b> | $0.16 \pm 0.05$   | $0.002 \pm 0.001$   |
| <b>Complex 4</b> | $0.03 \pm 0.01$   | $0.0015 \pm 0.0008$ |
| <b>Complex 5</b> | n/a               | n/a                 |

**Table S2** - Kinetic rate constants corresponding to the main steps of the drug internalization event for complexes **1**, **2**, **4** and **5**.

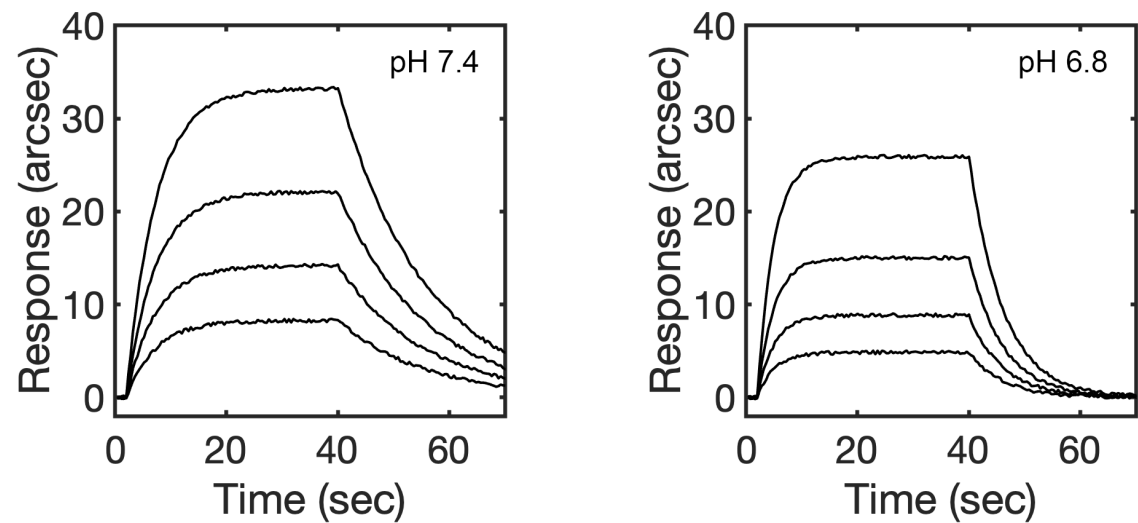

**Figure S55.** Effect of pH on the serum albumin binding. Representative comparison of the kinetics of binding of complex 5 to surface blocked BSA under different pH conditions.

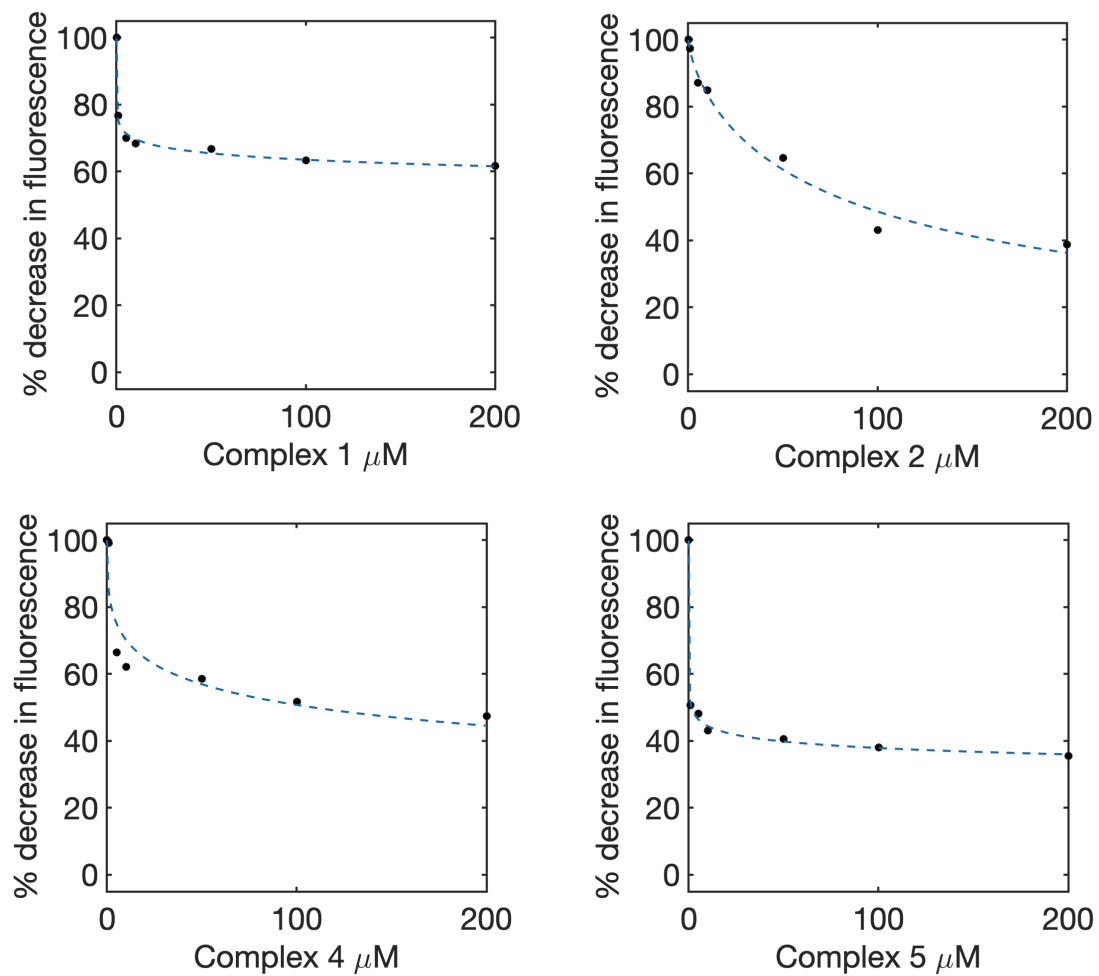

**Figure S56.** Decrease in intrinsic emission of BSA at 360 nm upon quenching of Trp fluorescence in the presence of increasing concentrations of complexes **1**, **2**, **4** and **5**.

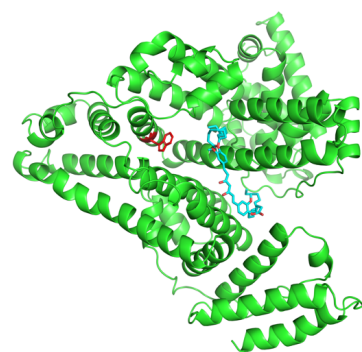

Complex 1

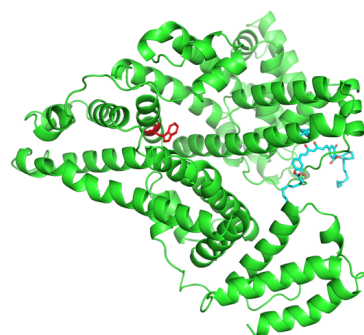

Complex 2

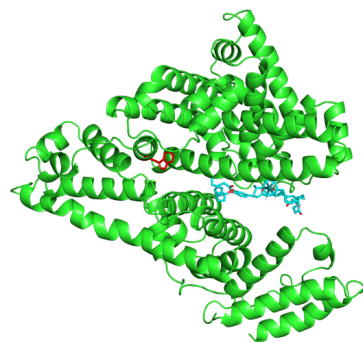

Complex 4

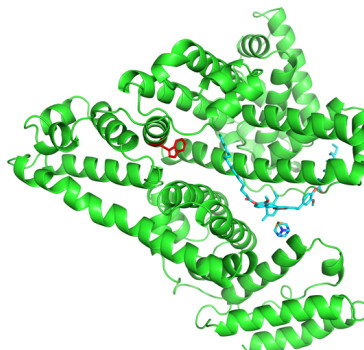

Complex 5

**Figure S57.** Comparison of the computed binding modes of complexes 1, 2, 4 and 5 to crystallographic structure of HSA. Trp residue responsible for the intrinsic fluorescence of HSA is rendered as red stick.

## References

- (1) Pettinari, R.; Marchetti, F.; Condello, F.; Pettinari, C.; Lupidi, G.; Scopelliti, R.; Mukhopadhyay, S.; Riedel, T.; Dyson, P. J. Ruthenium(II)-Arene RAPTA Type Complexes Containing Curcumin and Bisdemethoxycurcumin Display Potent and Selective Anticancer Activity. *Organometallics* **2014**, *33* (14), 3709–3715.
- (2) Pettinari, R.; Marchetti, F.; Di Nicola, C.; Pettinari, C.; Cuccioloni, M.; Bonfili, L.; Eleuteri, A. M.; Therrien, B.; Batchelor, L. K.; Dyson, P. J. Novel Osmium(Ii)-Cymene Complexes Containing Curcumin and Bisdemethoxycurcumin Ligands. *Inorg. Chem. Front.* **2019**, *6* (9), 2448–2457.
- (3) Caruso, F.; Rossi, M.; Benson, A.; Opazo, C.; Freedman, D.; Monti, E.; Gariboldi, M. B.; Shaulky, J.; Marchetti, F.; Pettinari, R.; Pettinari, C. Ruthenium-Arene Complexes of Curcumin: X-Ray and Density Functional Theory Structure, Synthesis, and Spectroscopic Characterization, in Vitro Antitumor Activity, and DNA Docking Studies of (p-Cymene)Ru(Curcuminato)Chloro. *J. Med. Chem.* **2012**, *55* (3), 1072–1081.
